# Supplementary material for: Ferrocene- and ruthenium arene-containing glycomimetics as selective inhibitors of human galectin-1 and -3
Source: Royal Society of Chemistry journal article supplement (doi:10.1039/d4qi01555j), 2024-01-01

## Ferrocene- and ruthenium arene-containing glycomimetics as selective inhibitors of human galectin-1 and -3

Vojtěch Hamala,<sup>a,b</sup> Martin Kurfíř,<sup>a,b</sup> Lucie Červenková Šťastná,<sup>a</sup> Hedvika Hujerová,<sup>a</sup> Jana Bernášková,<sup>a</sup> Kamil Parkan,<sup>c,d</sup> Jakub Kaminský,<sup>d</sup> Nina Habanová,<sup>d,e</sup> Jaroslav Kozák,<sup>d</sup> Alžběta Magdolenová,<sup>d</sup> Martin Zavřel,<sup>d</sup> Tatiana Staroňová,<sup>f,g</sup> Veronika Ostatná,<sup>g</sup> Lucie Žaloudková,<sup>f,g</sup> Aleš Daňhel,<sup>g</sup> Jitka Holčáková,<sup>h</sup> Petr Voňka,<sup>h</sup> Roman Hrstka,<sup>\*,h</sup> Jindřich Karban,<sup>\*,a</sup>

<sup>a</sup> Institute of Chemical Process Fundamentals of the CAS, v. v. i., Rozvojová 1/135, 165 00 Praha, Czech Republic. E-mail: karban@icpf.cas.cz.

<sup>b</sup> Department of Organic Chemistry, University of Chemistry and Technology, Technická 5, 166 28 Praha, Czech Republic.

<sup>c</sup> Department of Chemistry of Natural Compounds, University of Chemistry and Technology, Prague, Technická 5, 166 28, Prague, Czech Republic

<sup>d</sup> Institute of Organic Chemistry and Biochemistry of the CAS, v. v. i., Flemingovo nám. 542, 160 00 Praha, Czech Republic

<sup>e</sup> Department of Analytical Chemistry, University of Chemistry and Technology, Technická 5, 166 28 Praha, Czech Republic.

<sup>f</sup> Department of Biochemistry, Faculty of Science, Masaryk University, Kotlářská 2, 602 00, Brno, Czech Republic

<sup>g</sup> Institute of Biophysics of the CAS, v. v. i., Královopolská 135, 612 00 Brno, Czech Republic

<sup>h</sup> Research Centre for Applied Molecular Oncology, Masaryk Memorial Cancer Institute, Žlutý kopec 7, 656 53 Brno, Czech Republic.

\*E-mail: [hrstka@mou.cz](mailto:hrstka@mou.cz), [karban@icpf.cas.cz](mailto:karban@icpf.cas.cz)

## SUPPORTING INFORMATION II

### Copies of NMR Spectra

|                       |    |
|-----------------------|----|
| NMR COMPOUND 6 .....  | 3  |
| NMR COMPOUND 7 .....  | 9  |
| NMR COMPOUND 8 .....  | 15 |
| NMR COMPOUND 10 ..... | 21 |
| NMR COMPOUND 13 ..... | 27 |
| NMR COMPOUND 14 ..... | 33 |
| NMR COMPOUND 15 ..... | 35 |
| NMR COMPOUND 16 ..... | 41 |
| NMR COMPOUND 18 ..... | 47 |

|                       |     |
|-----------------------|-----|
| NMR COMPOUND 19 ..... | 49  |
| NMR COMPOUND 22 ..... | 55  |
| NMR COMPOUND 23 ..... | 57  |
| NMR COMPOUND 24 ..... | 63  |
| NMR COMPOUND 25 ..... | 68  |
| NMR COMPOUND 26 ..... | 73  |
| NMR COMPOUND 27 ..... | 79  |
| NMR COMPOUND 28 ..... | 85  |
| NMR COMPOUND 29 ..... | 92  |
| NMR COMPOUND 30 ..... | 97  |
| NMR COMPOUND 33 ..... | 103 |
| NMR COMPOUND 34 ..... | 105 |
| NMR COMPOUND 36 ..... | 111 |
| NMR COMPOUND 36 ..... | 116 |
| NMR COMPOUND 37 ..... | 121 |
| NMR COMPOUND 38 ..... | 123 |
| NMR COMPOUND 41 ..... | 128 |
| NMR COMPOUND 42 ..... | 135 |
| NMR COMPOUND S3.....  | 142 |

# NMR COMPOUND 6

<sup>1</sup>H NMR (400 MHz, MeOD) 6

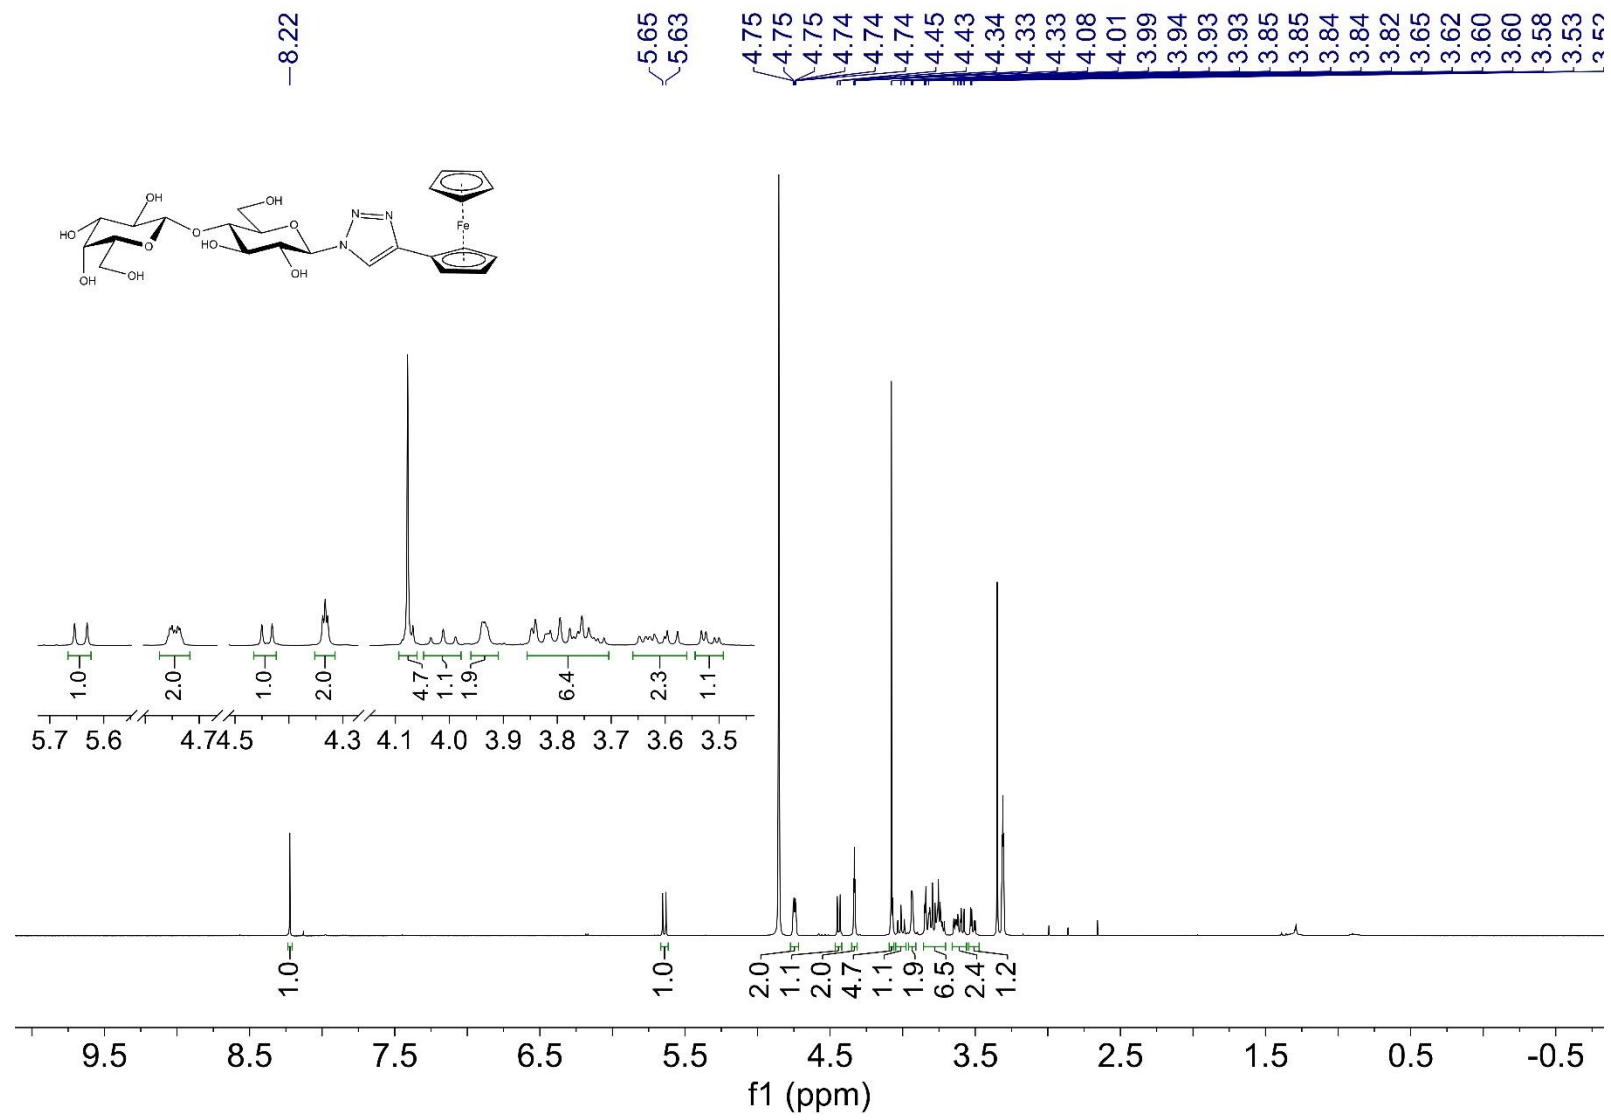

<sup>13</sup>C NMR (101 MHz, MeOD) 6

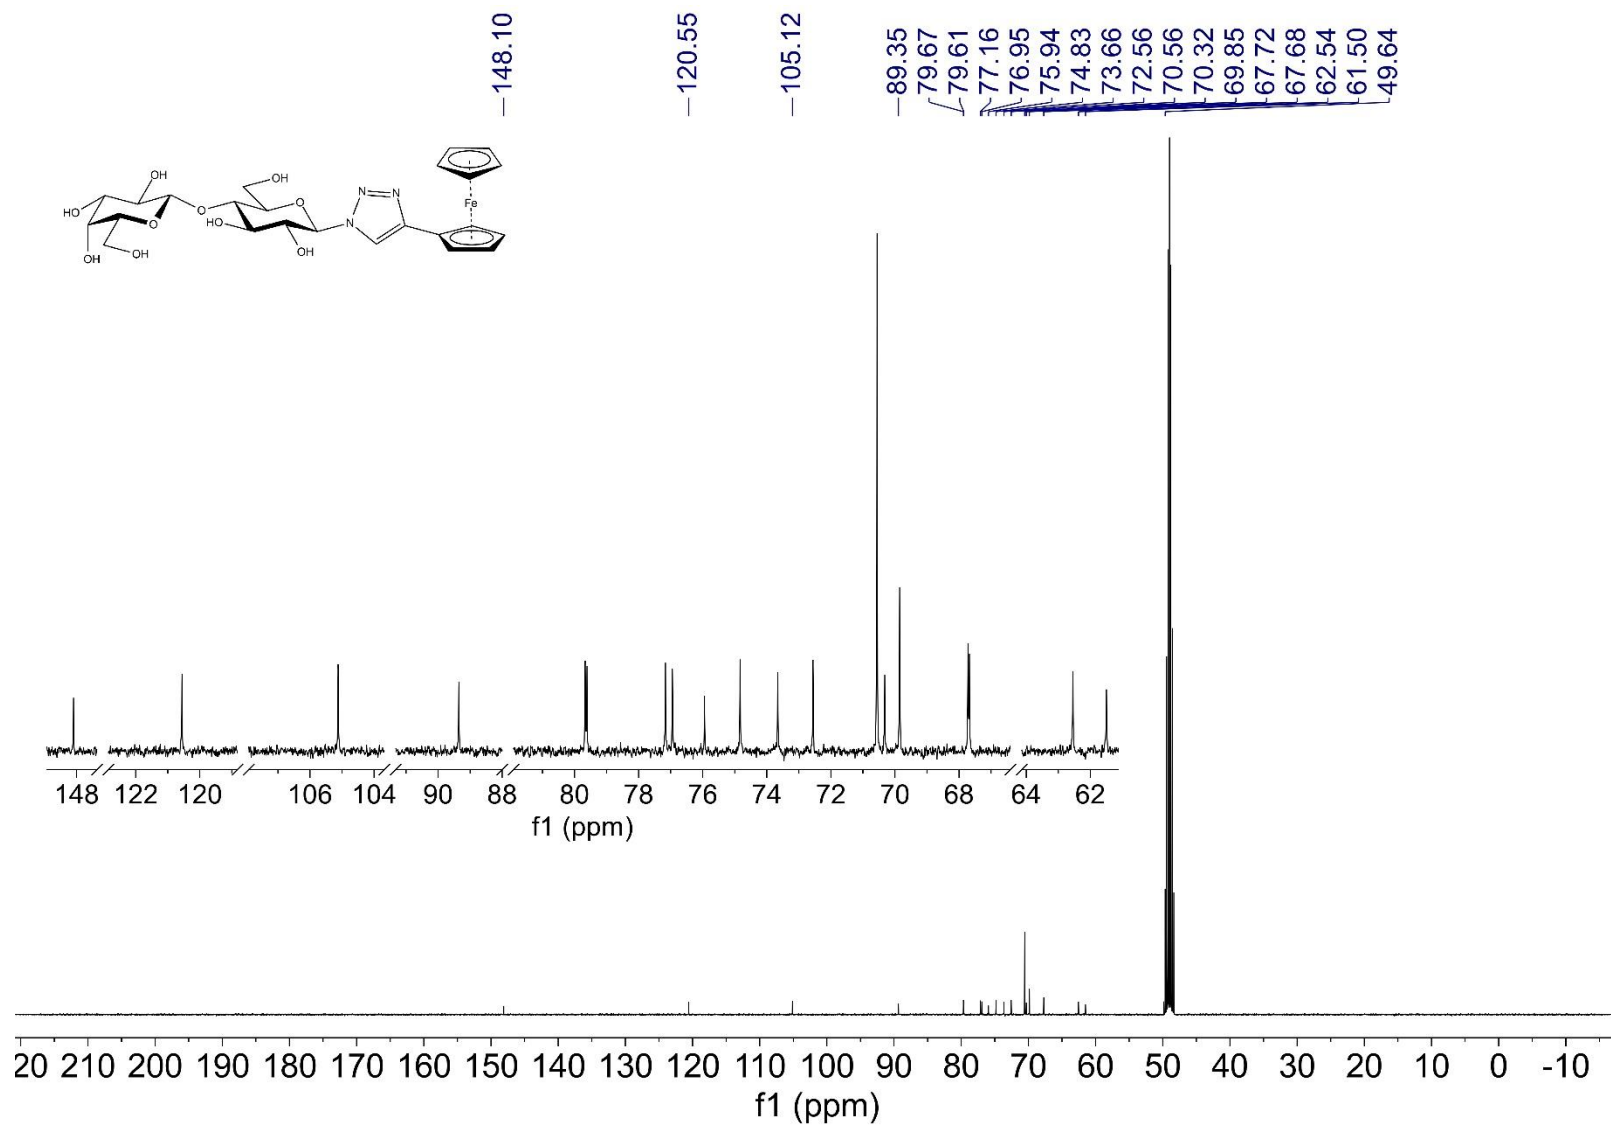

**<sup>1</sup>H-<sup>1</sup>H COSY 6**

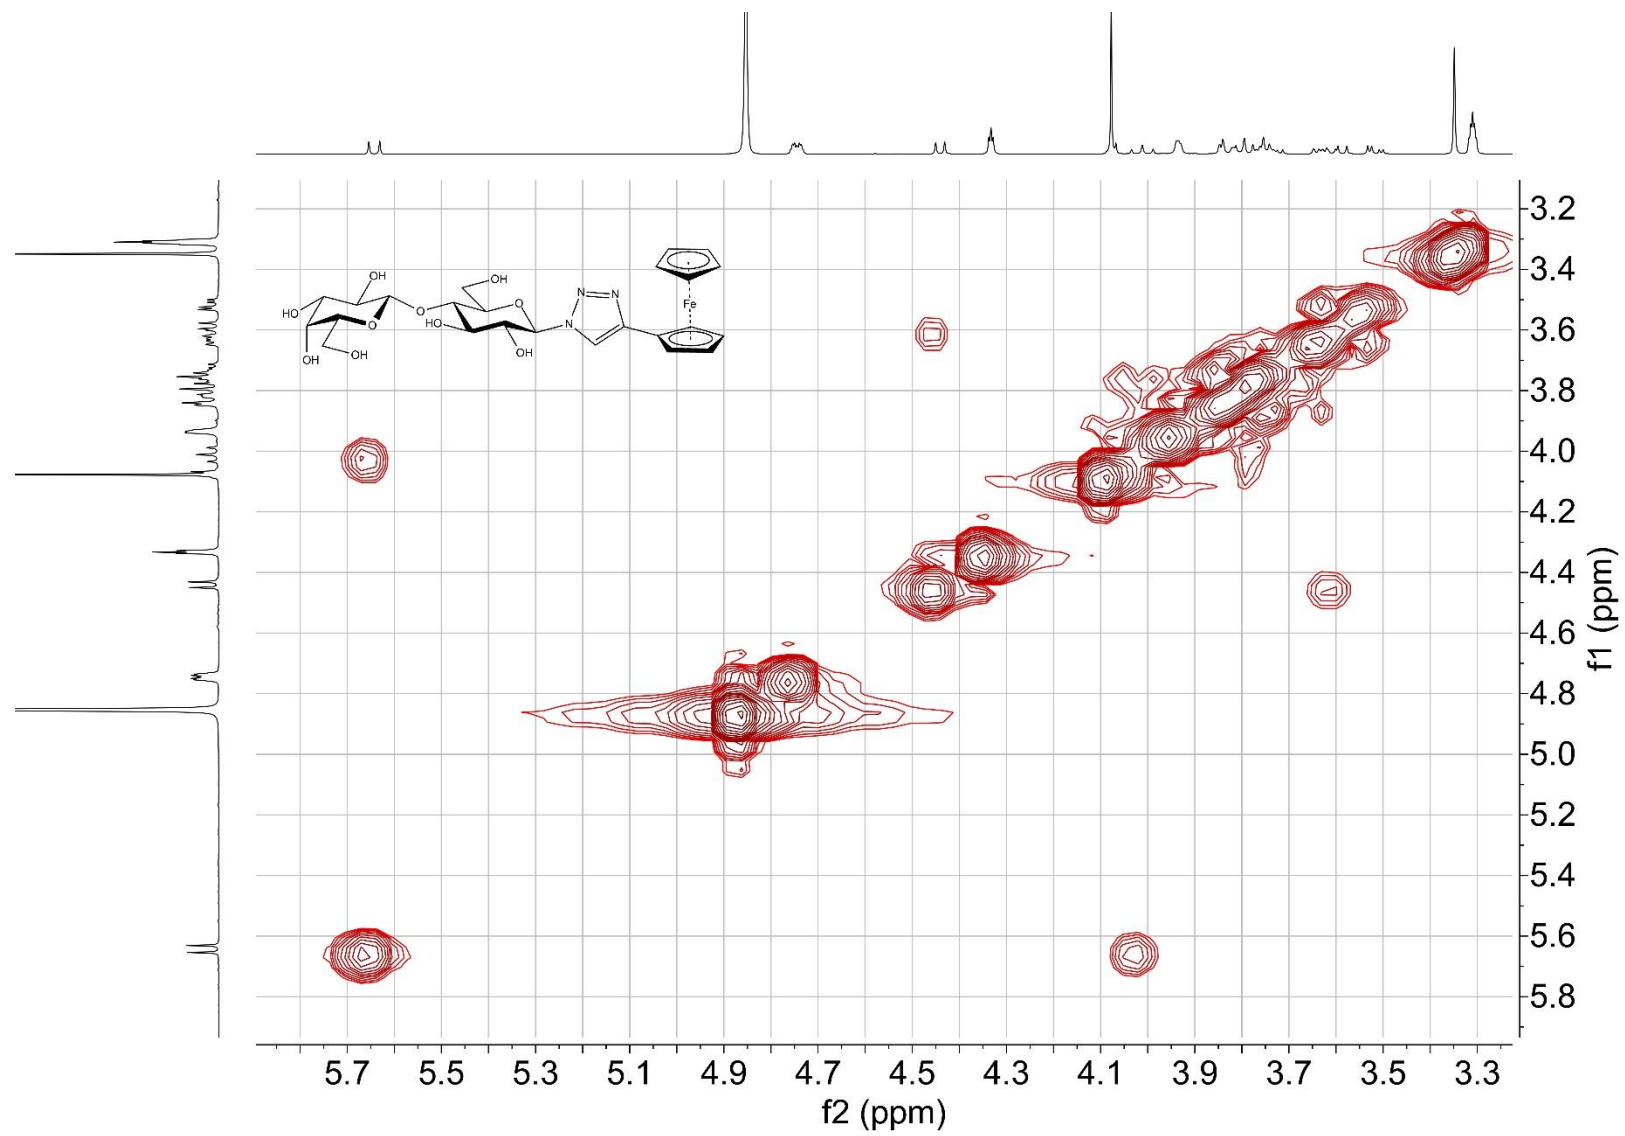

$^1\text{H}$ - $^{13}\text{C}$  HSQC 6

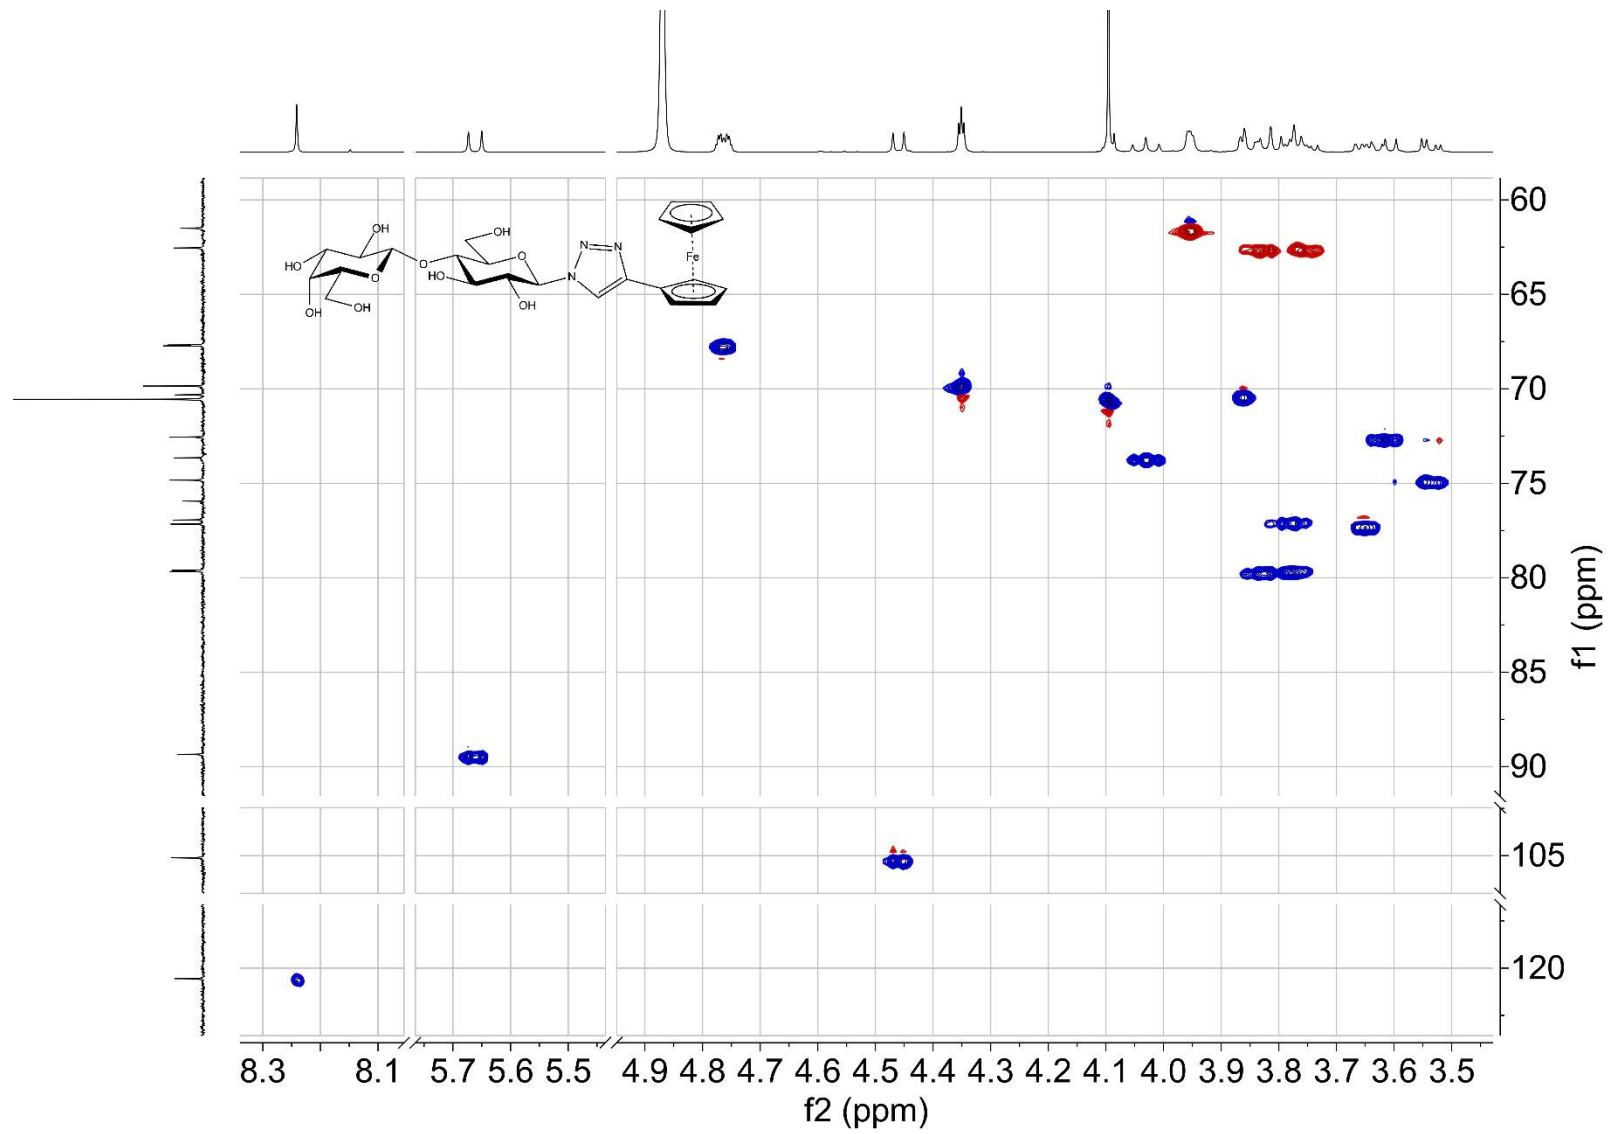

**$^1\text{H}$ - $^{13}\text{C}$  HMBC 6**

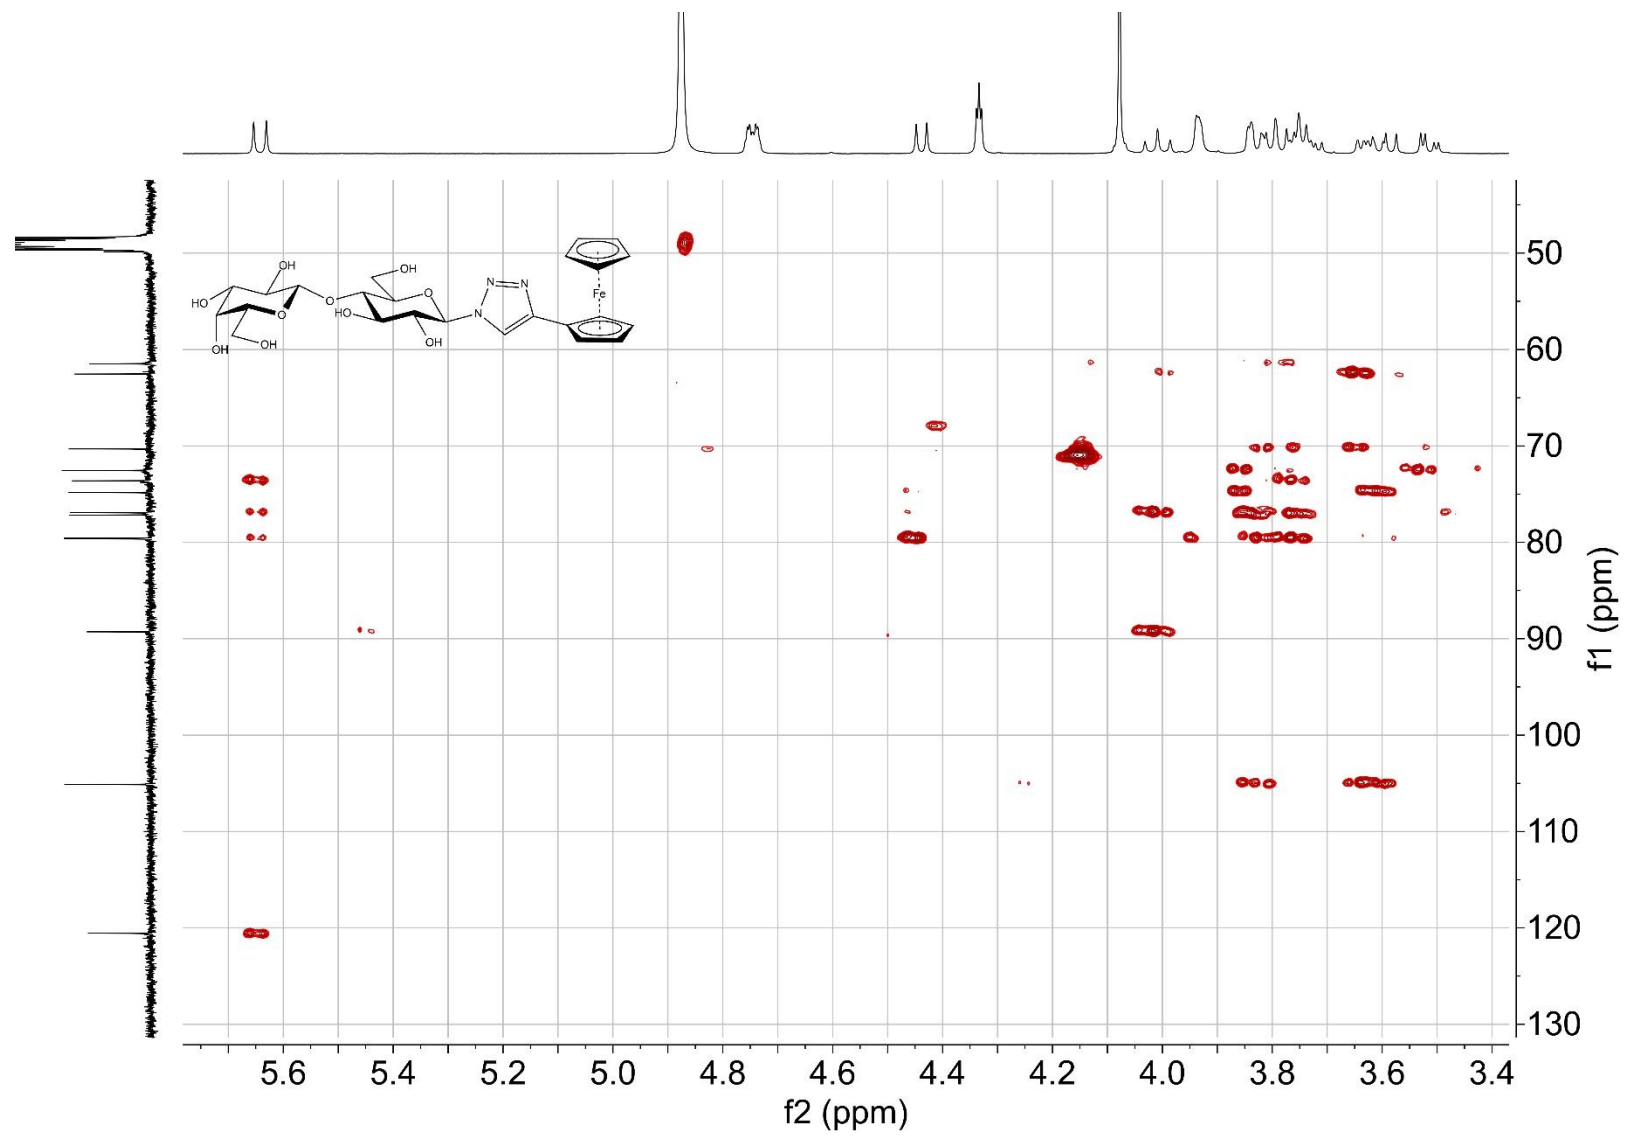

$^1\text{H}$ - $^{13}\text{C}$  HSQTOCSY 6

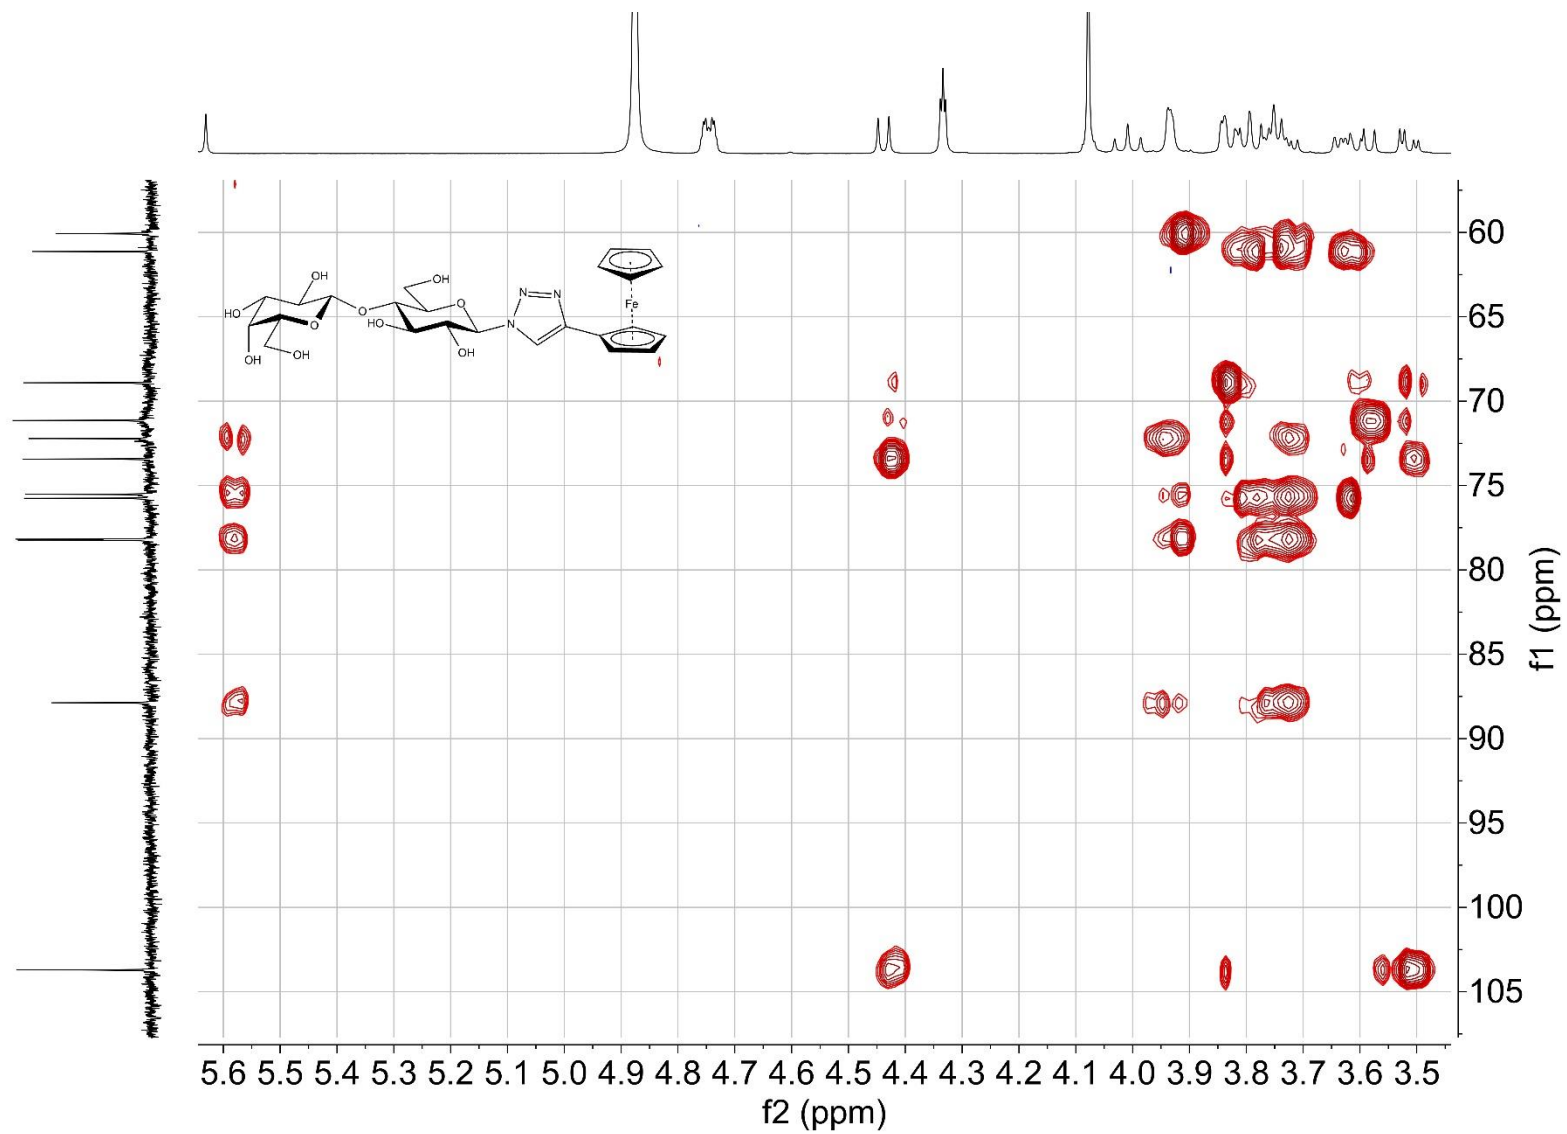



# NMR COMPOUND 7

<sup>1</sup>H NMR (400 MHz, DMSO-d<sub>6</sub>) 7

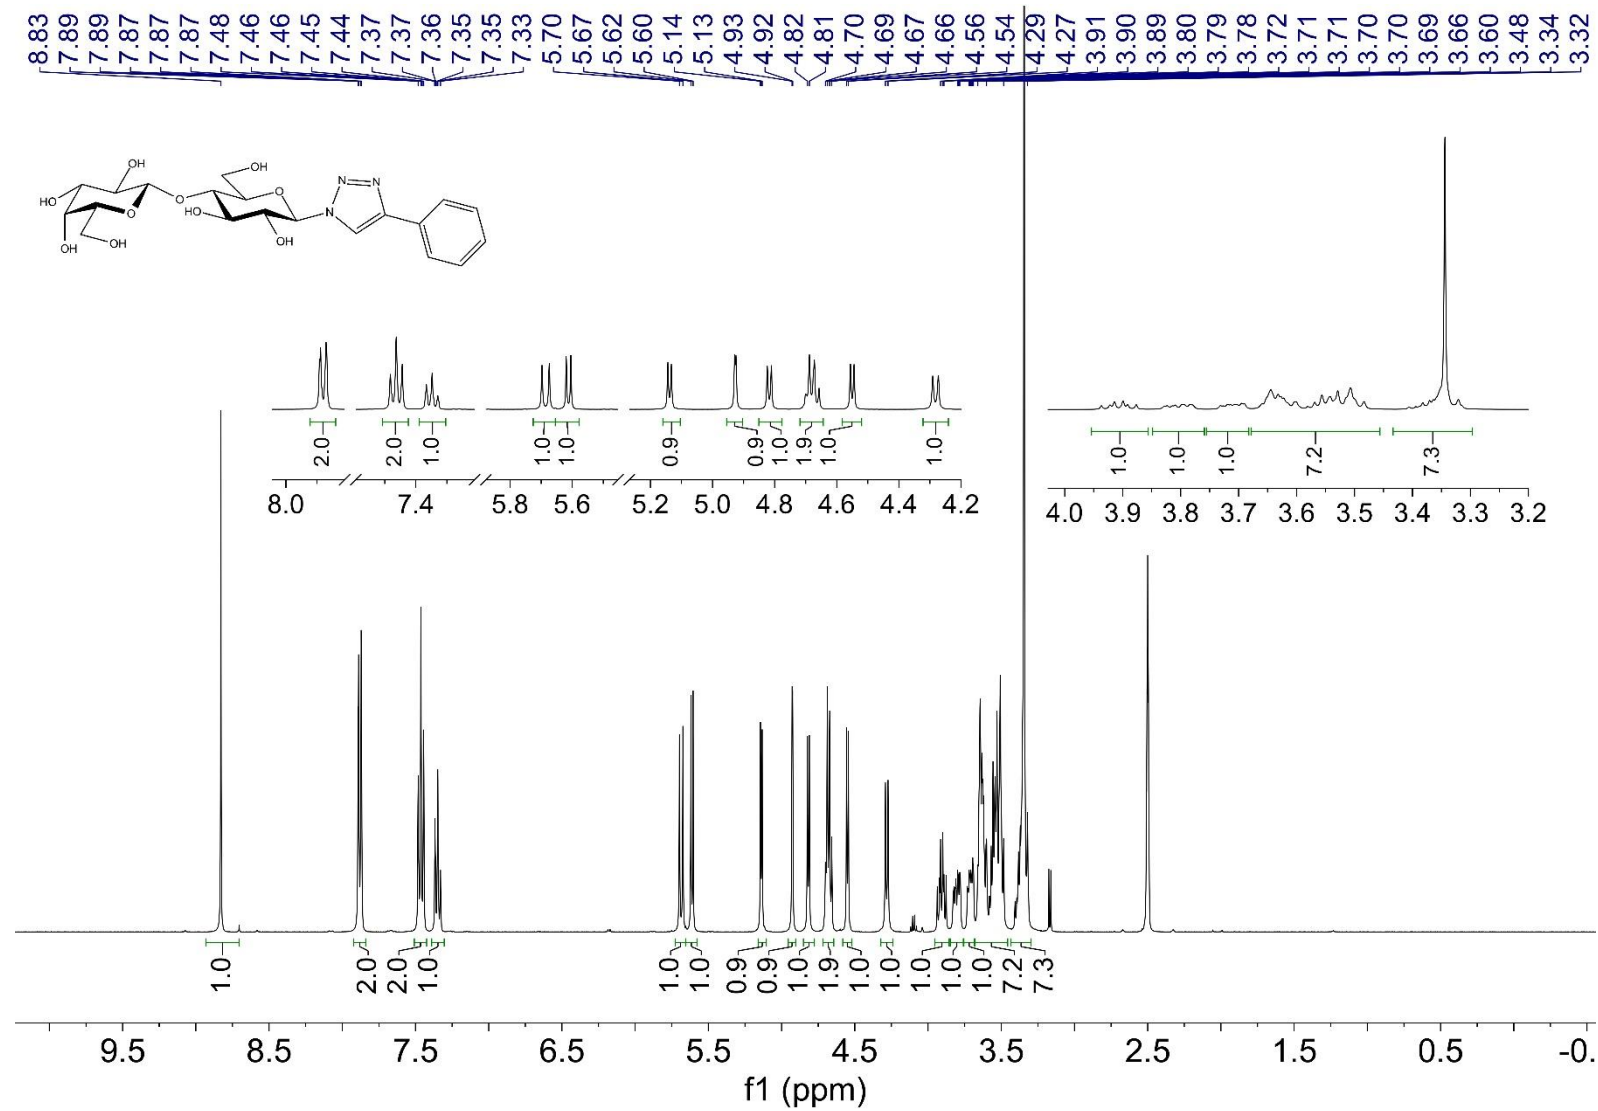

<sup>13</sup>C NMR (101 MHz, CDCl<sub>3</sub>) 7

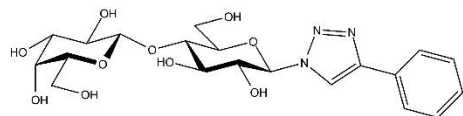

—146.39

130.58  
128.97  
128.02  
125.20  
120.49

—103.80

87.19  
79.77  
77.78  
75.63  
75.11  
73.27  
71.96  
70.56  
68.19  
60.46  
60.07

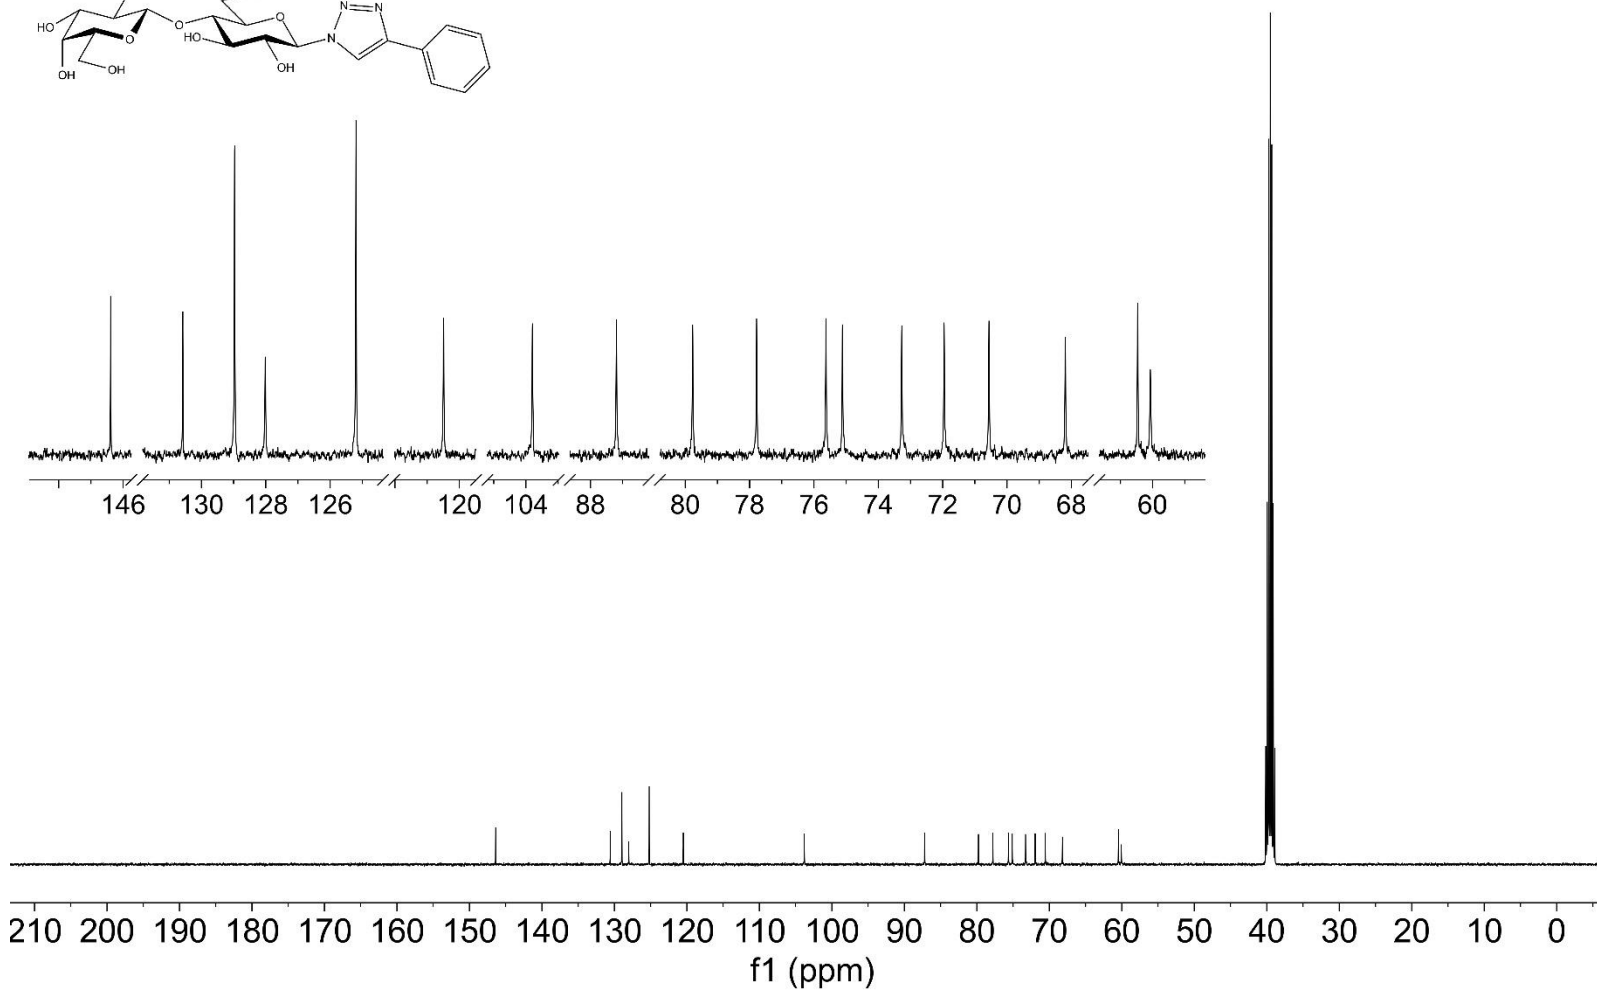

<sup>1</sup>H-<sup>1</sup>H COSY 7

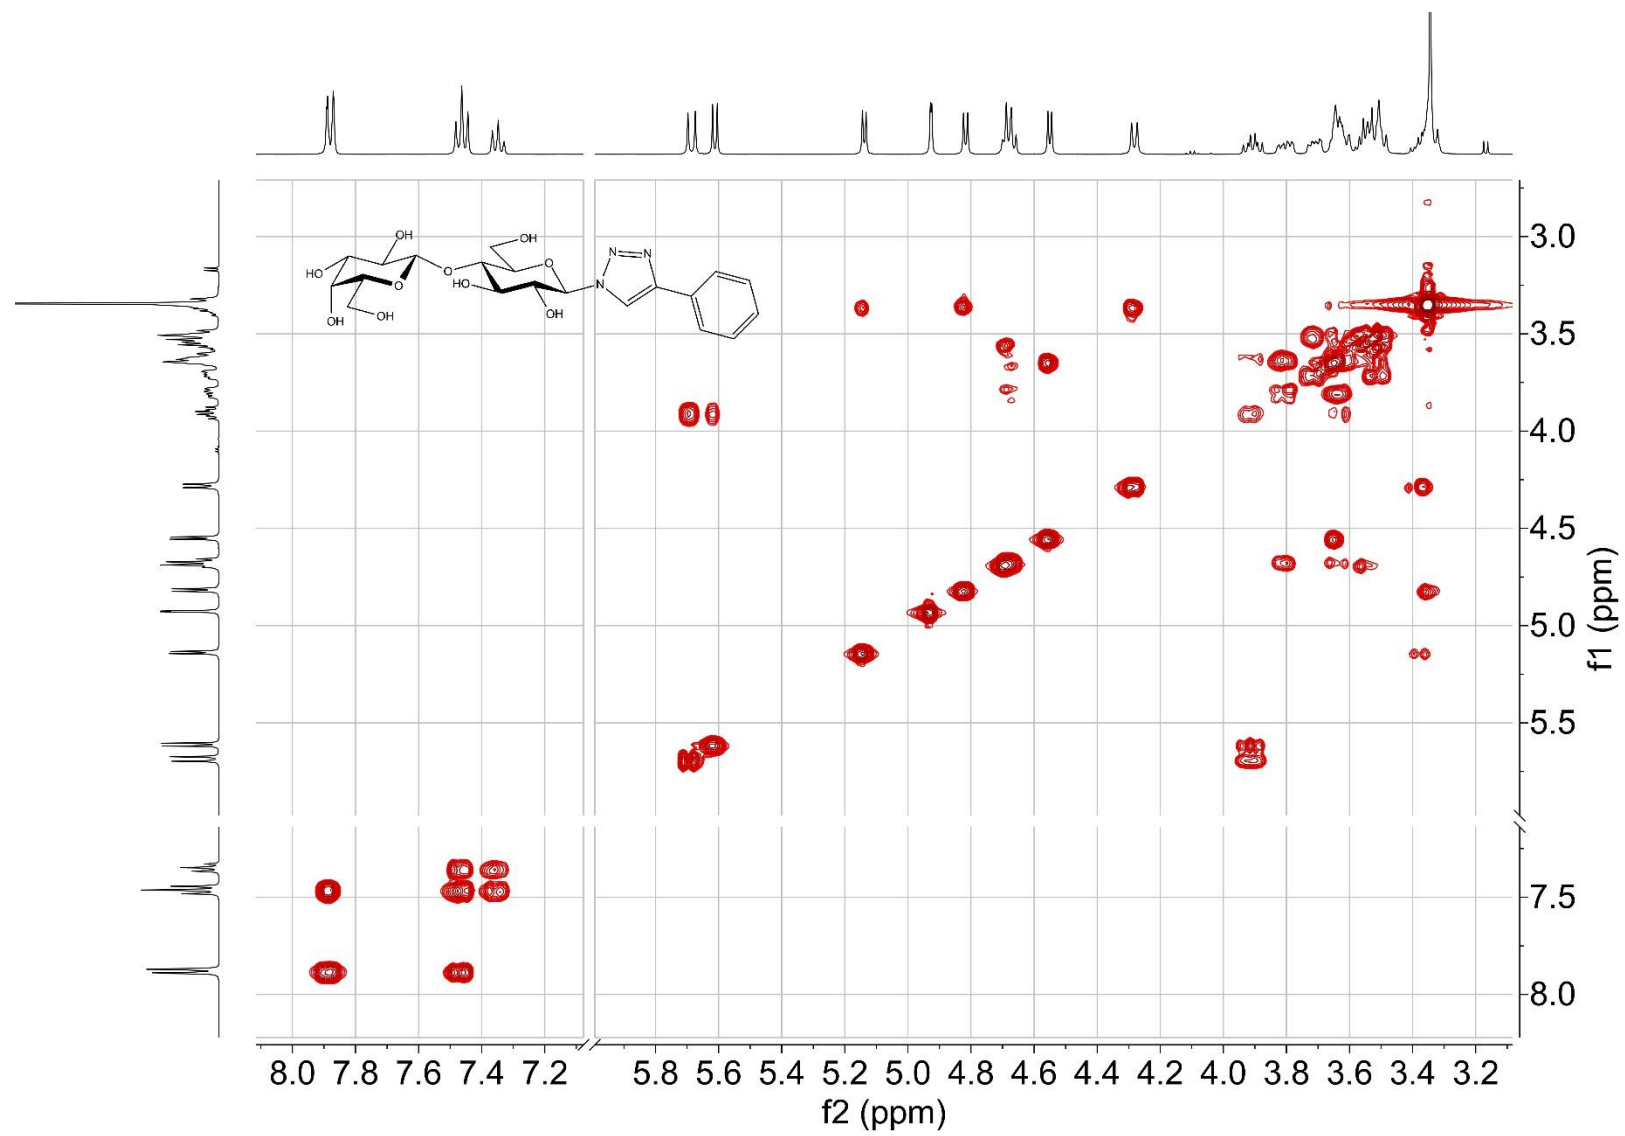

$^1\text{H}$ - $^{13}\text{C}$  HSQC 7

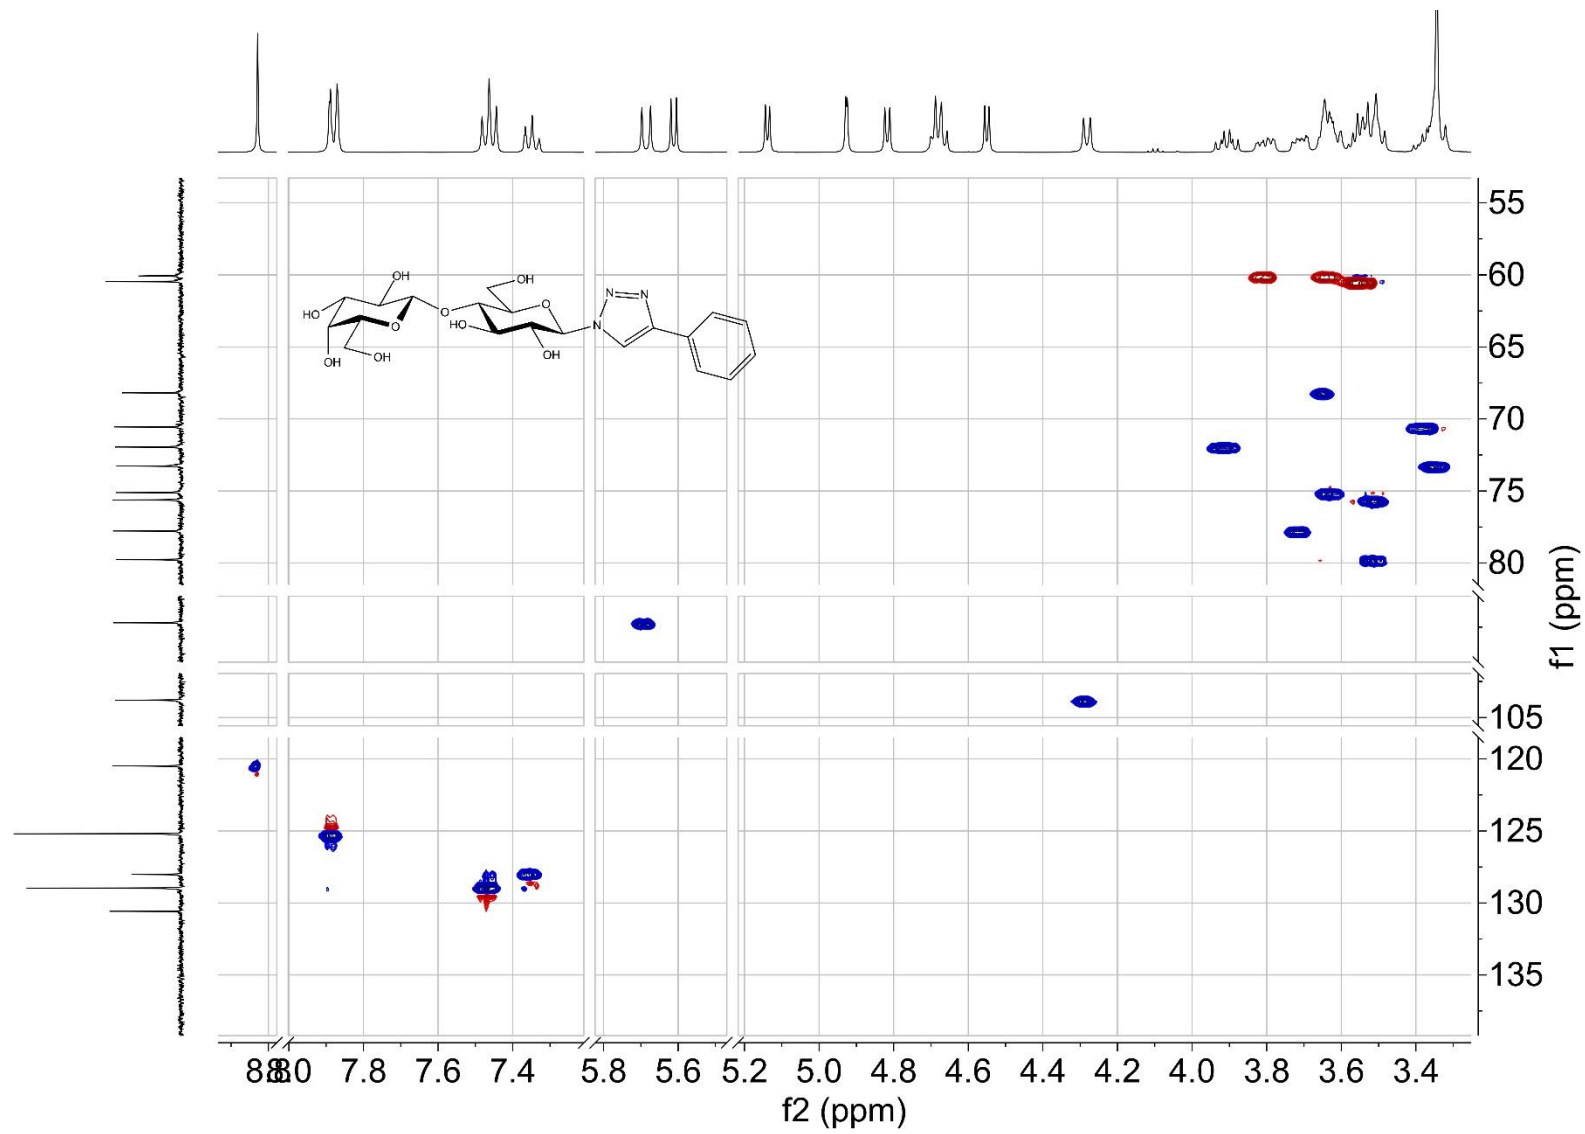

$^1\text{H}$ - $^{13}\text{C}$  HMBC 7

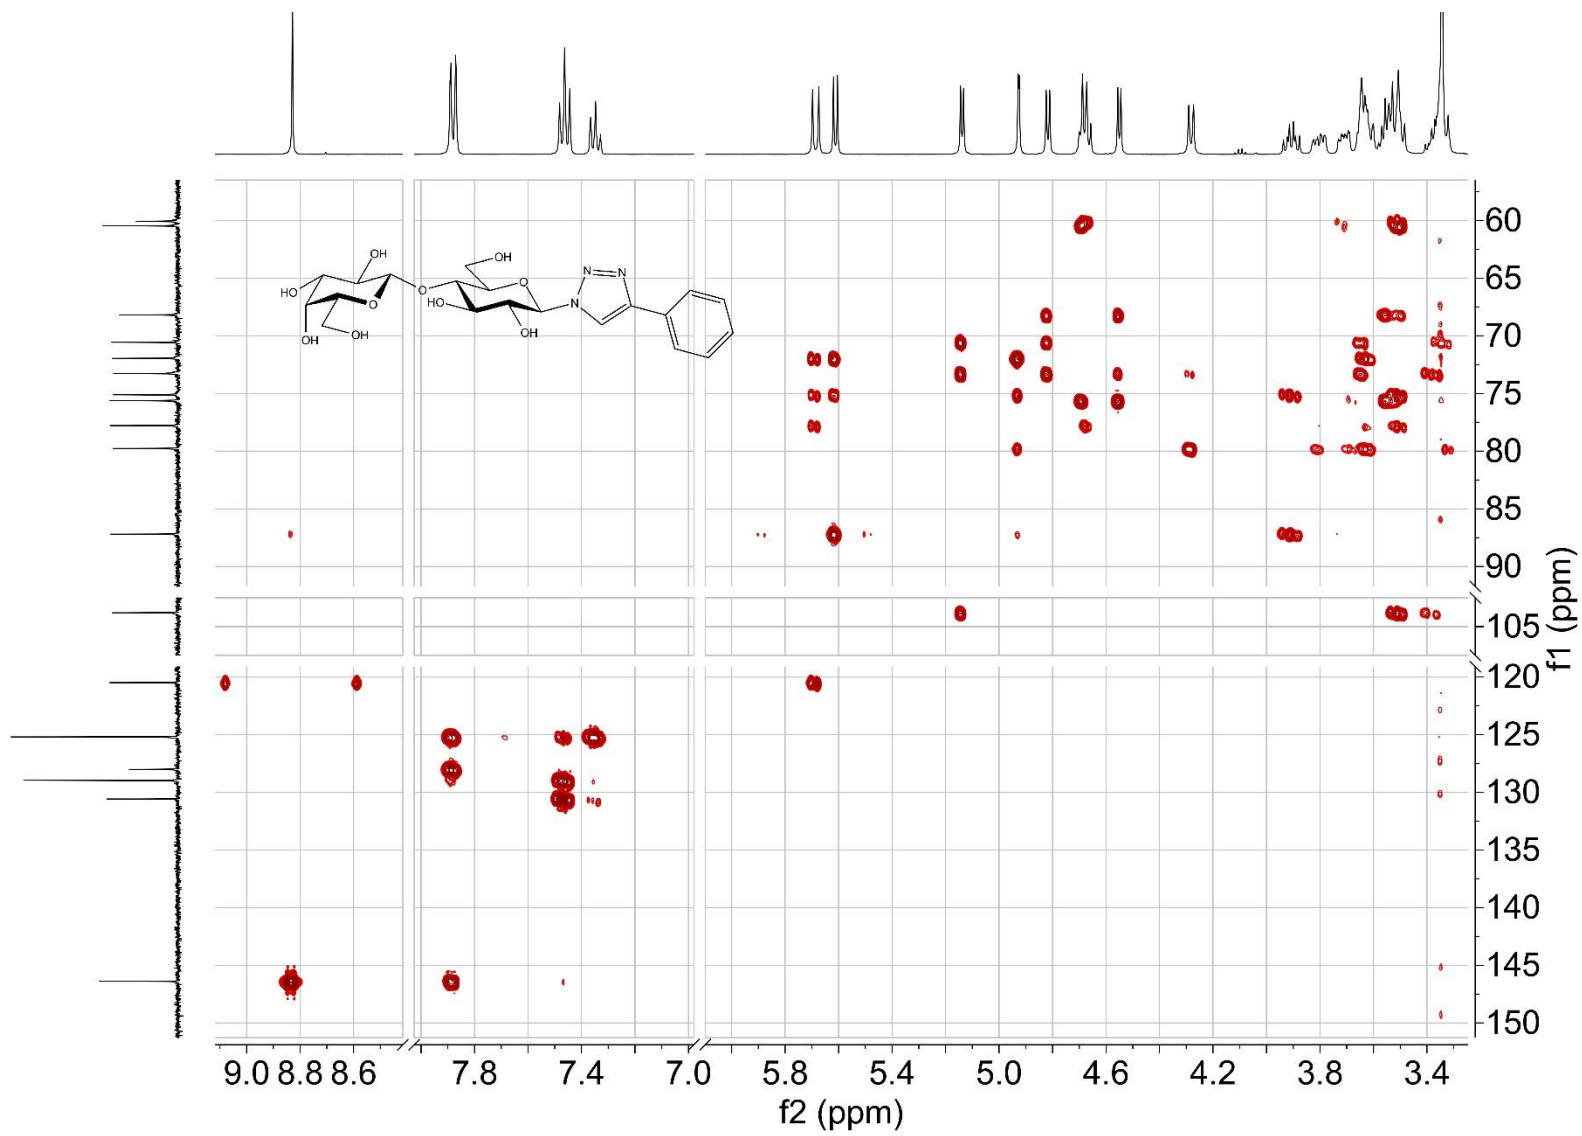

$^1\text{H}$ - $^{13}\text{C}$  HSQCTOCSY 7

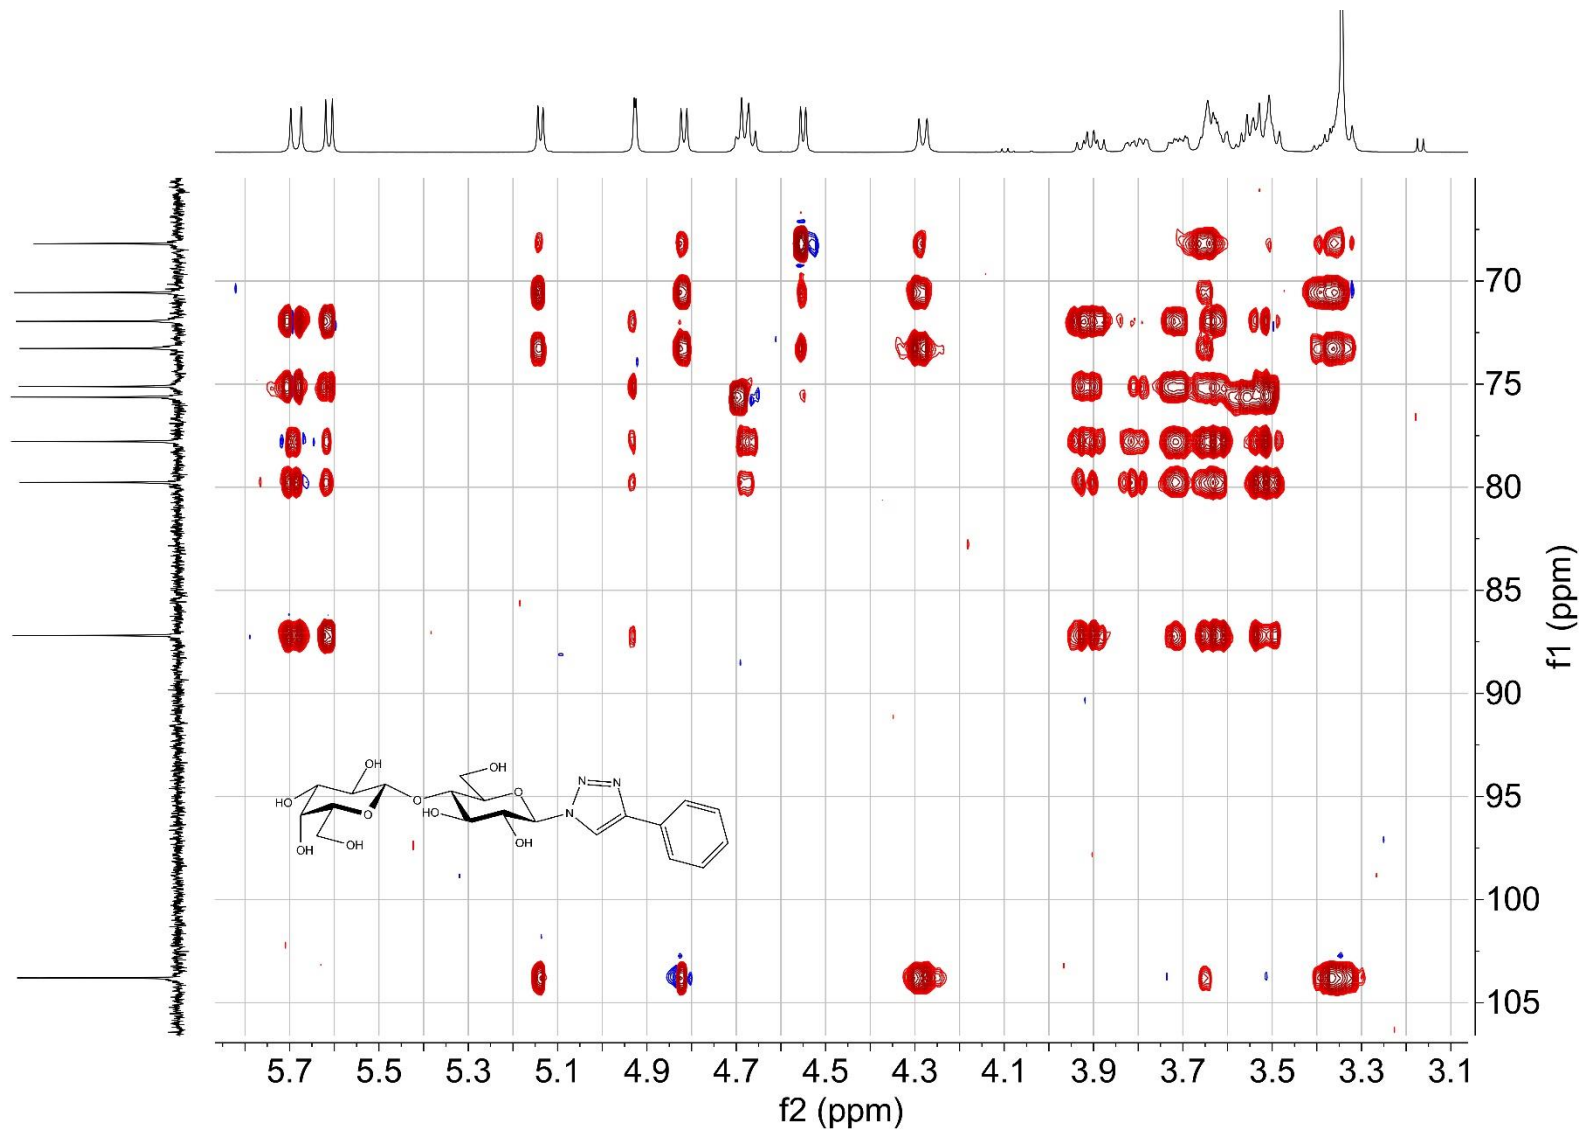

# NMR COMPOUND 8

<sup>1</sup>H NMR (400 MHz, MeOD) 8

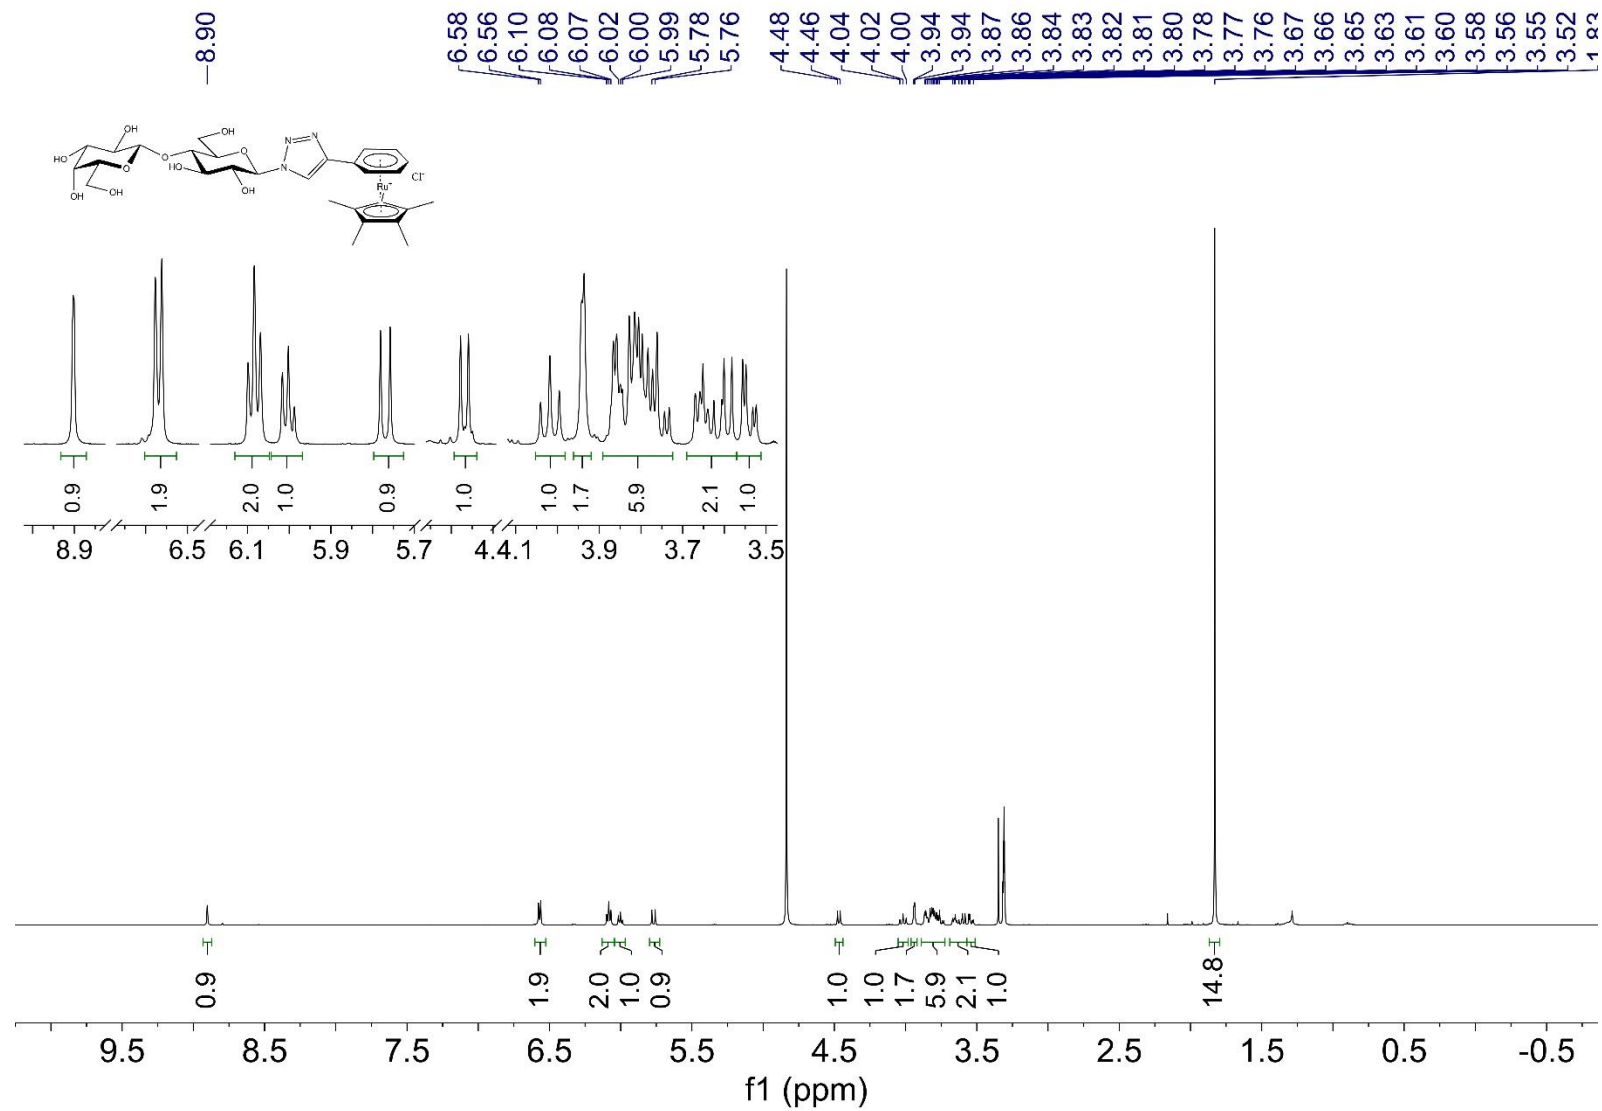

**<sup>13</sup>C NMR (101 MHz, MeOD) 8**

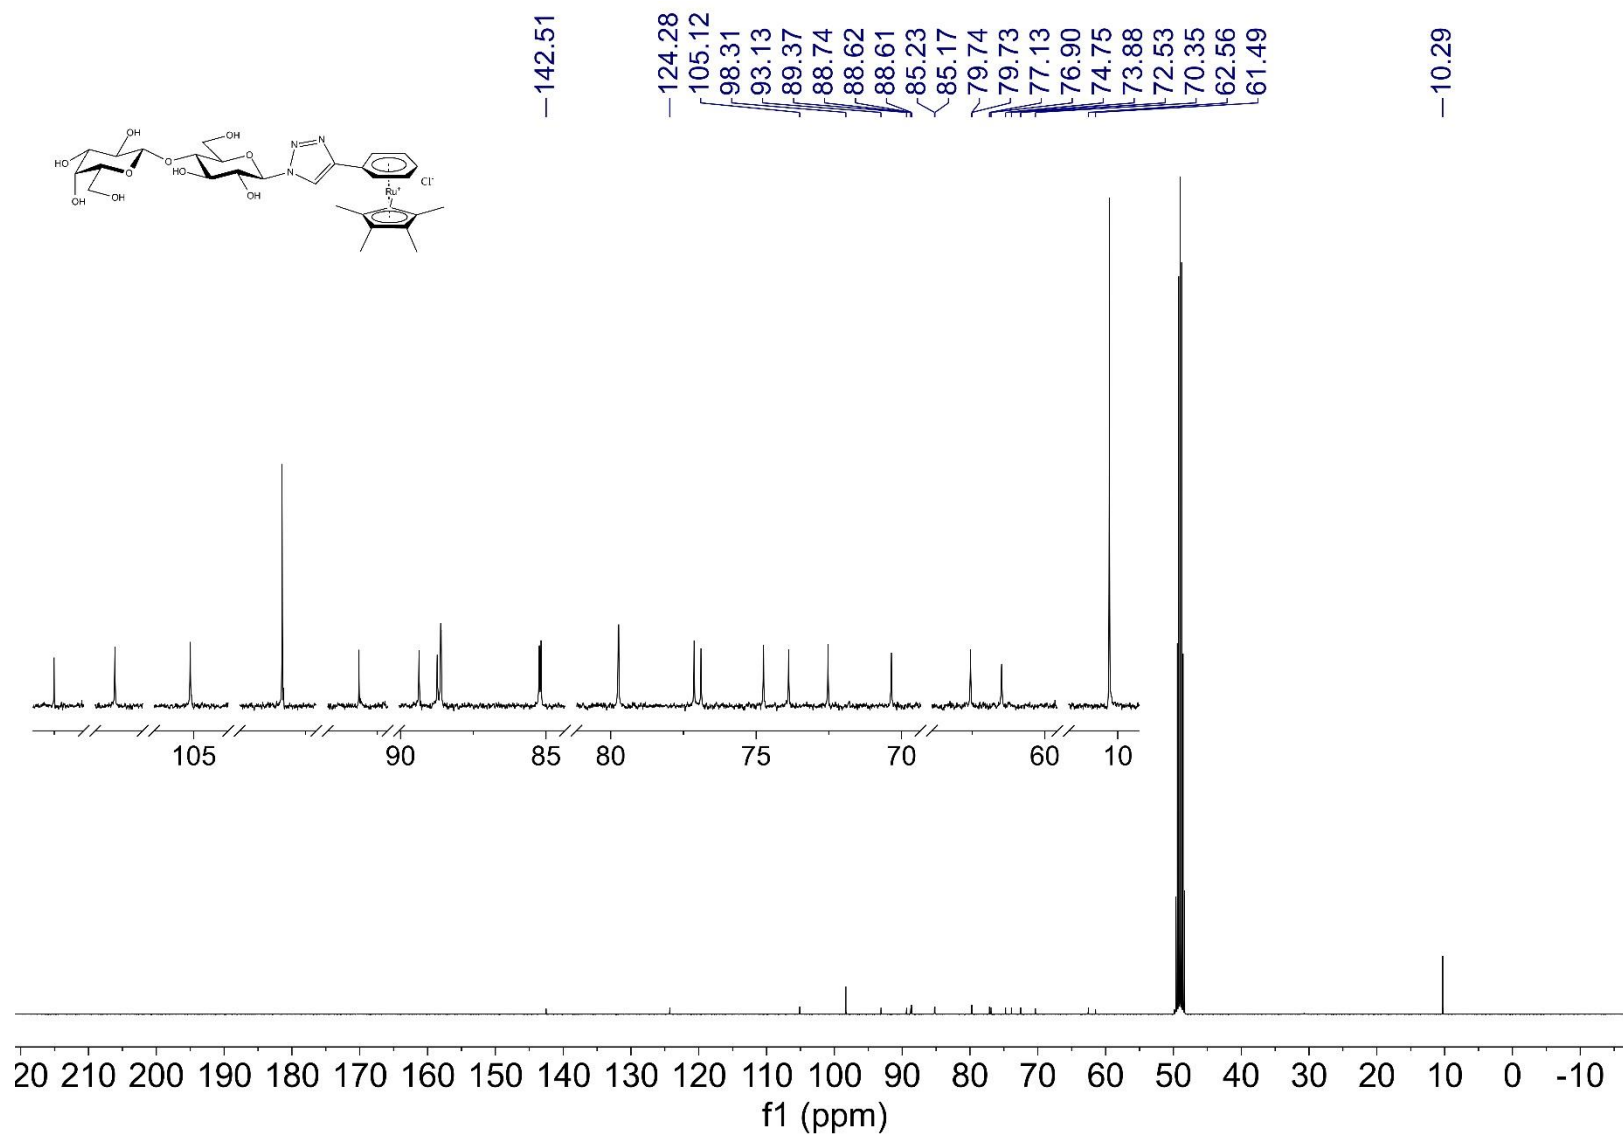



<sup>1</sup>H-<sup>1</sup>H COSY 8

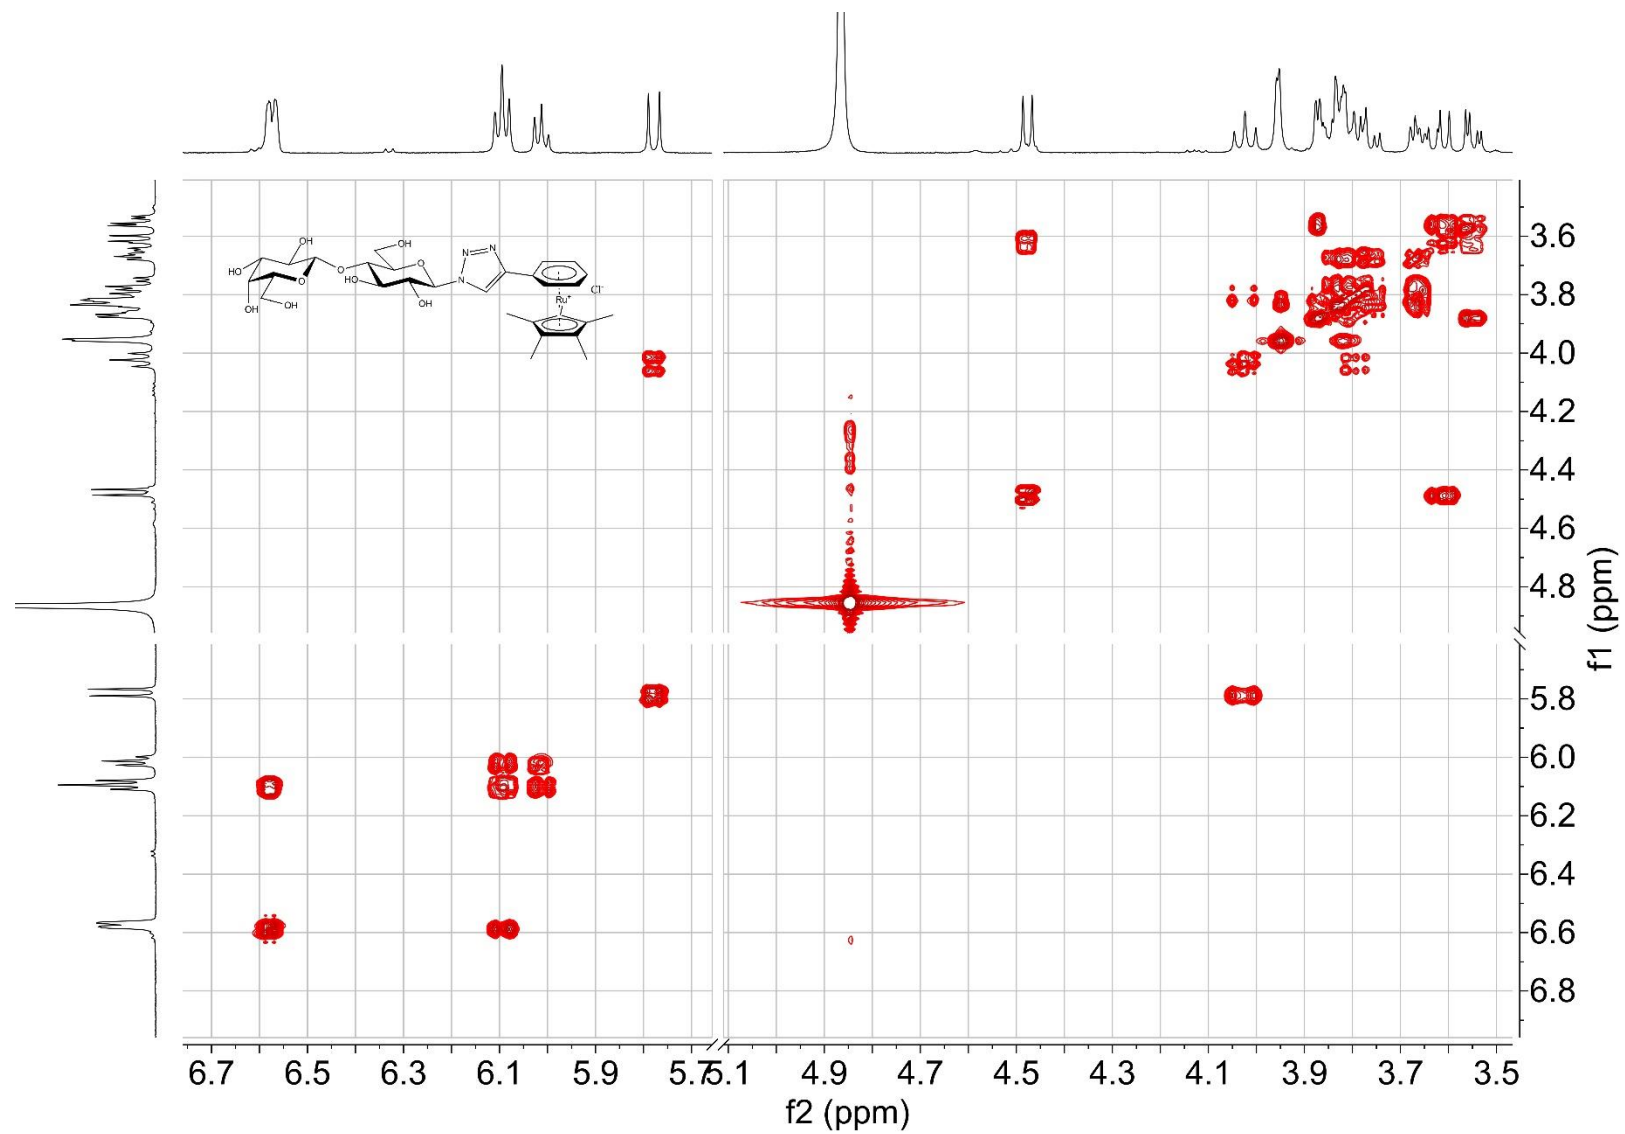

$^1\text{H}$ - $^{13}\text{C}$  HSQC 8

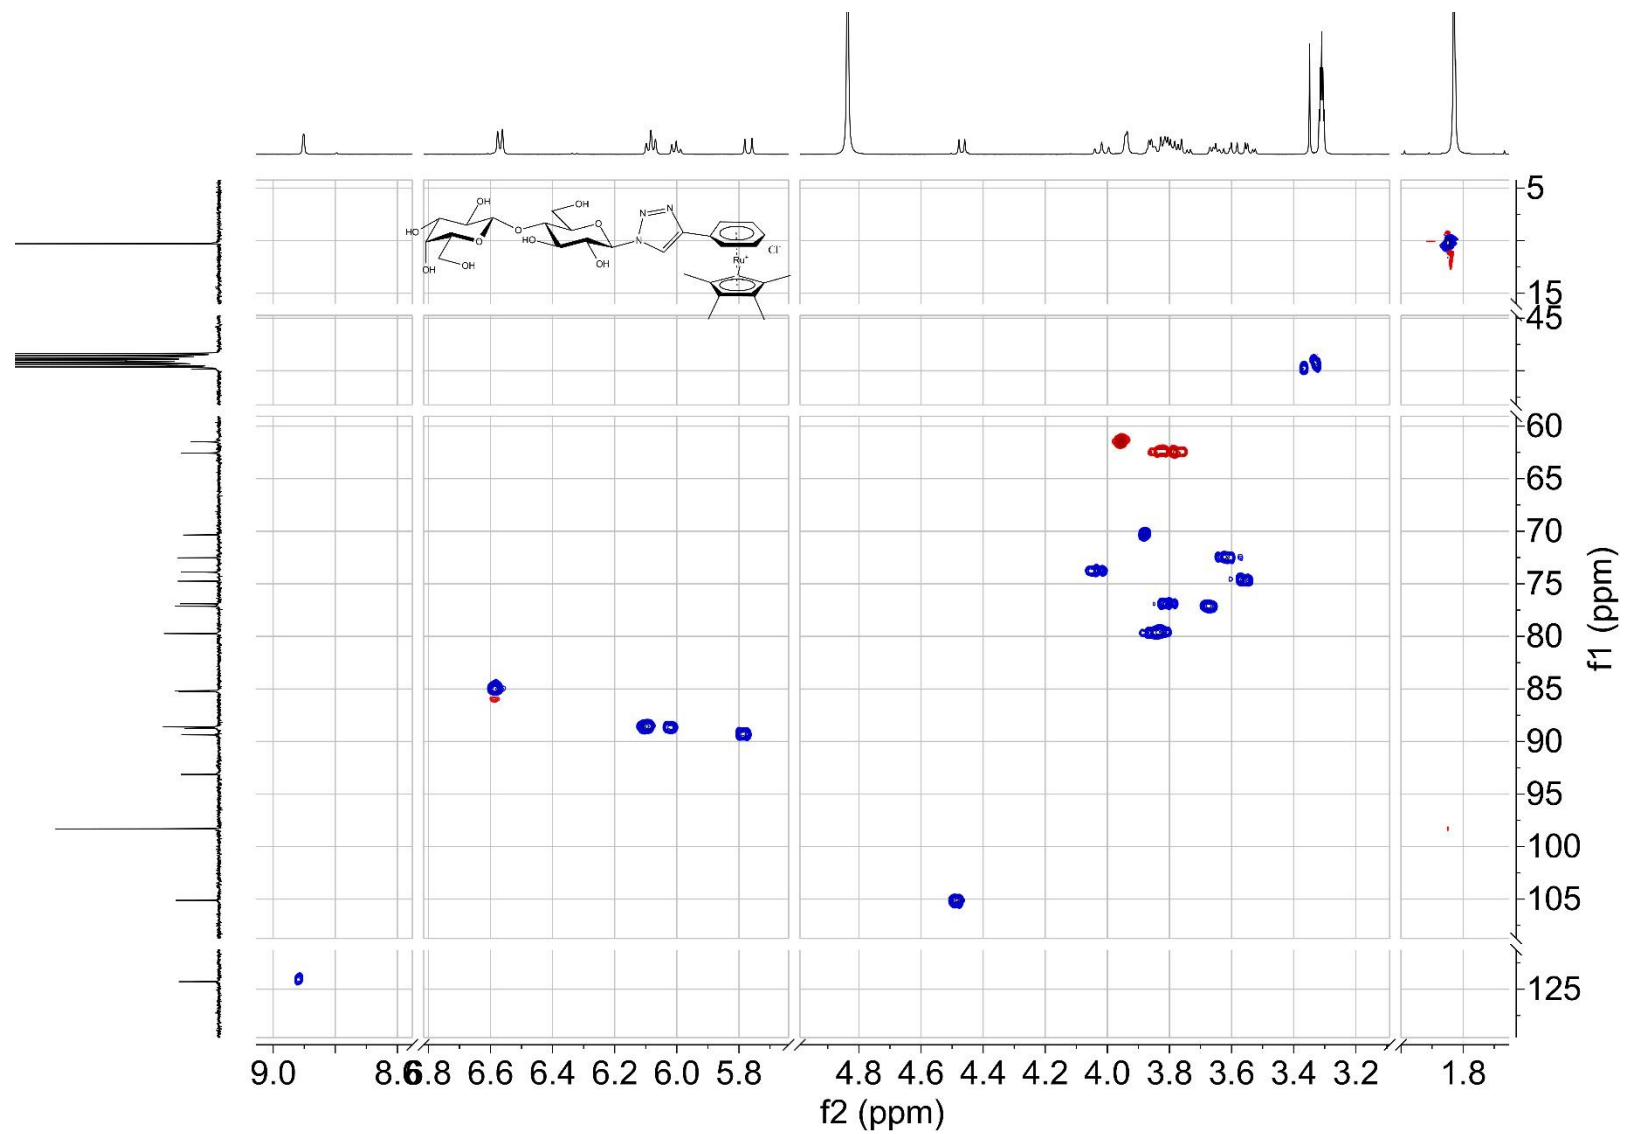

<sup>1</sup>H-<sup>13</sup>C HMBC 8

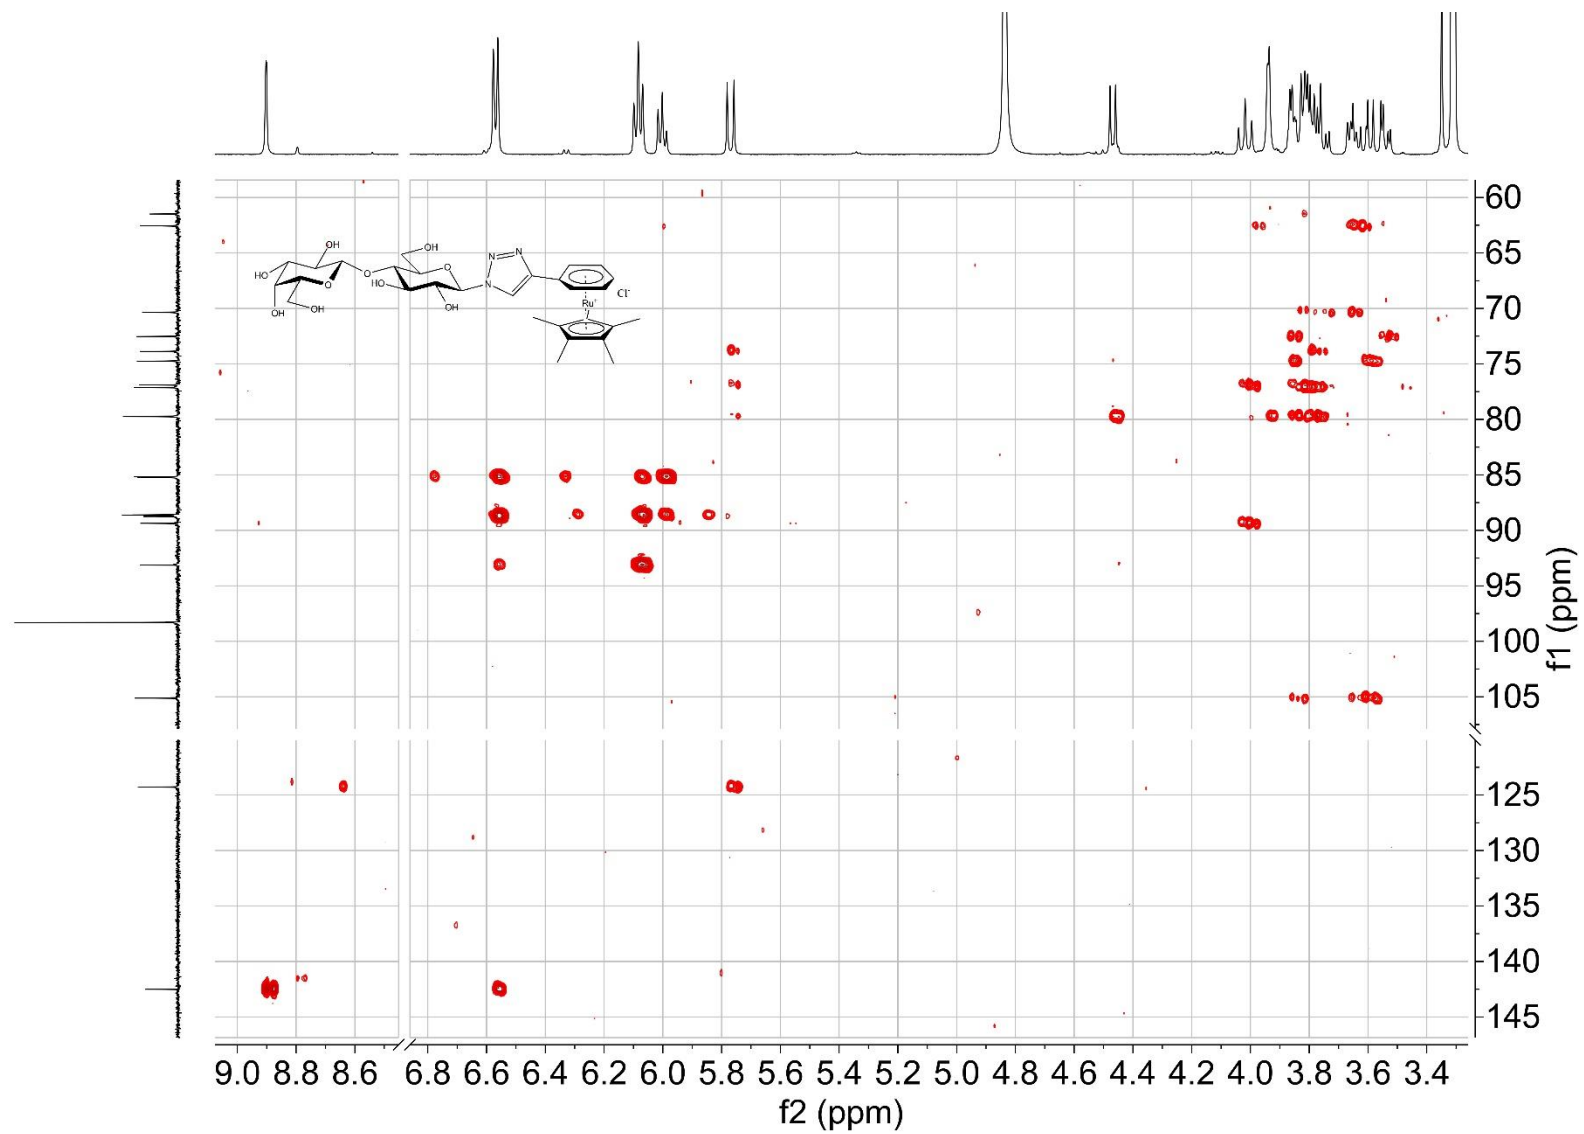

$^1\text{H}$ - $^{13}\text{C}$  HSQCTOCSY 8

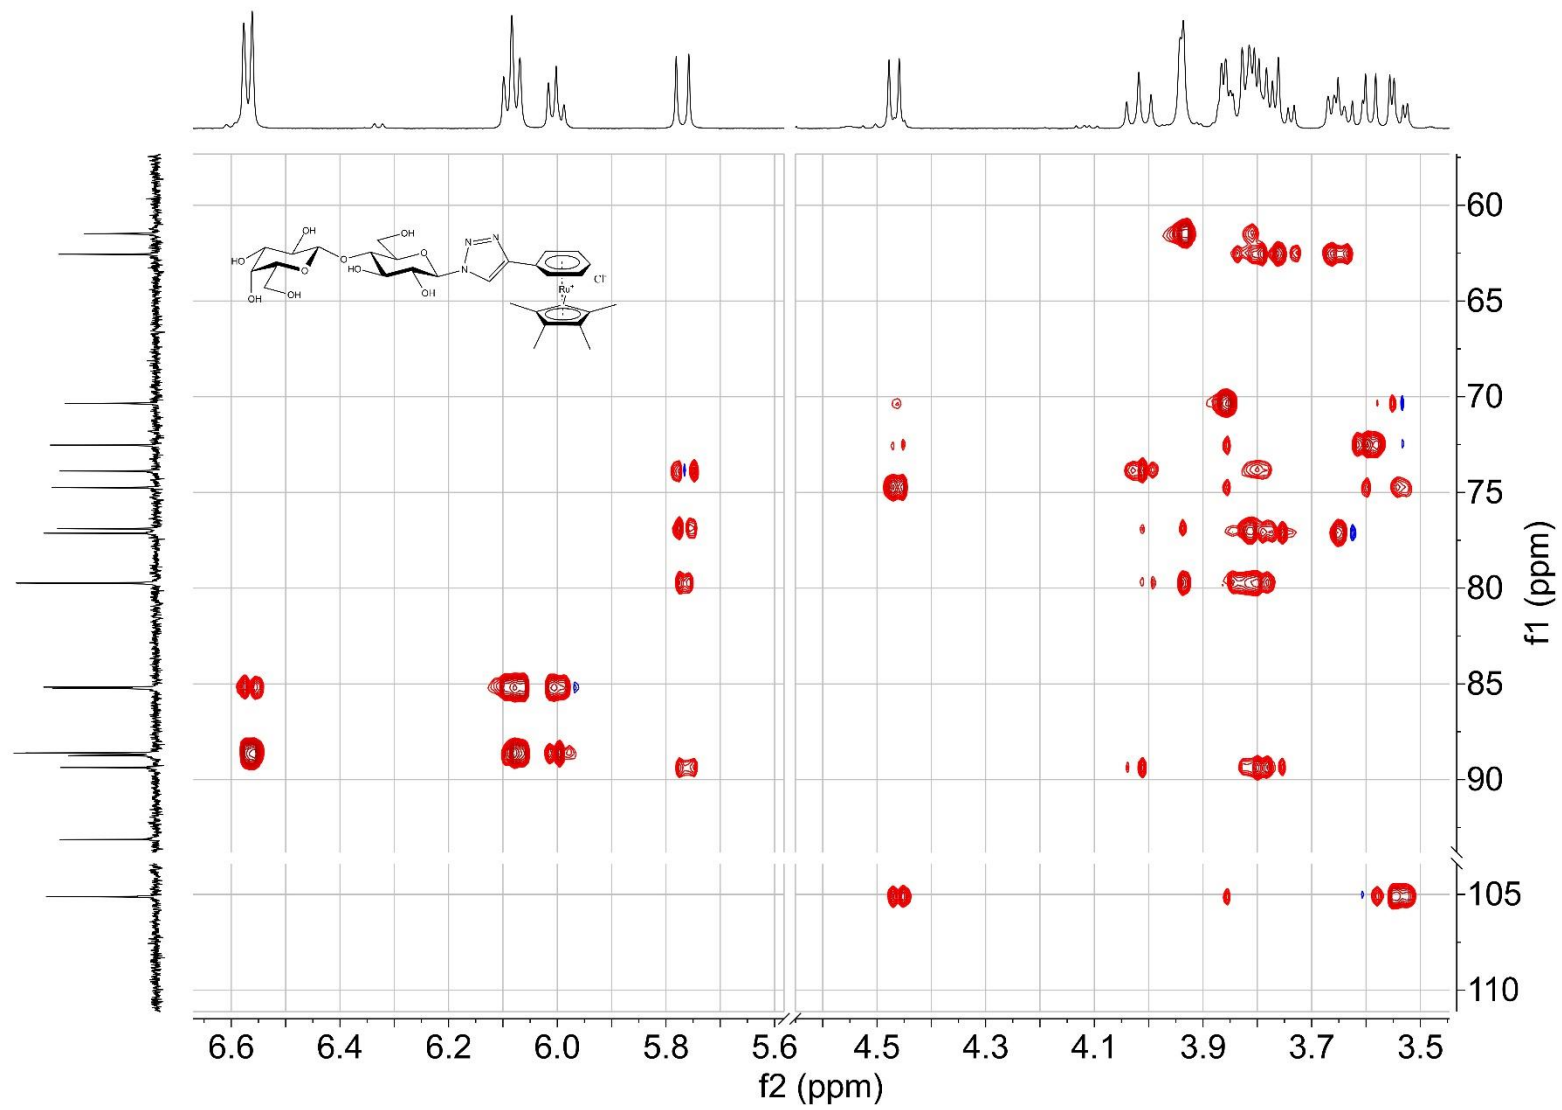

# NMR COMPOUND 10

<sup>1</sup>H NMR (400 MHz, MeOD) 10

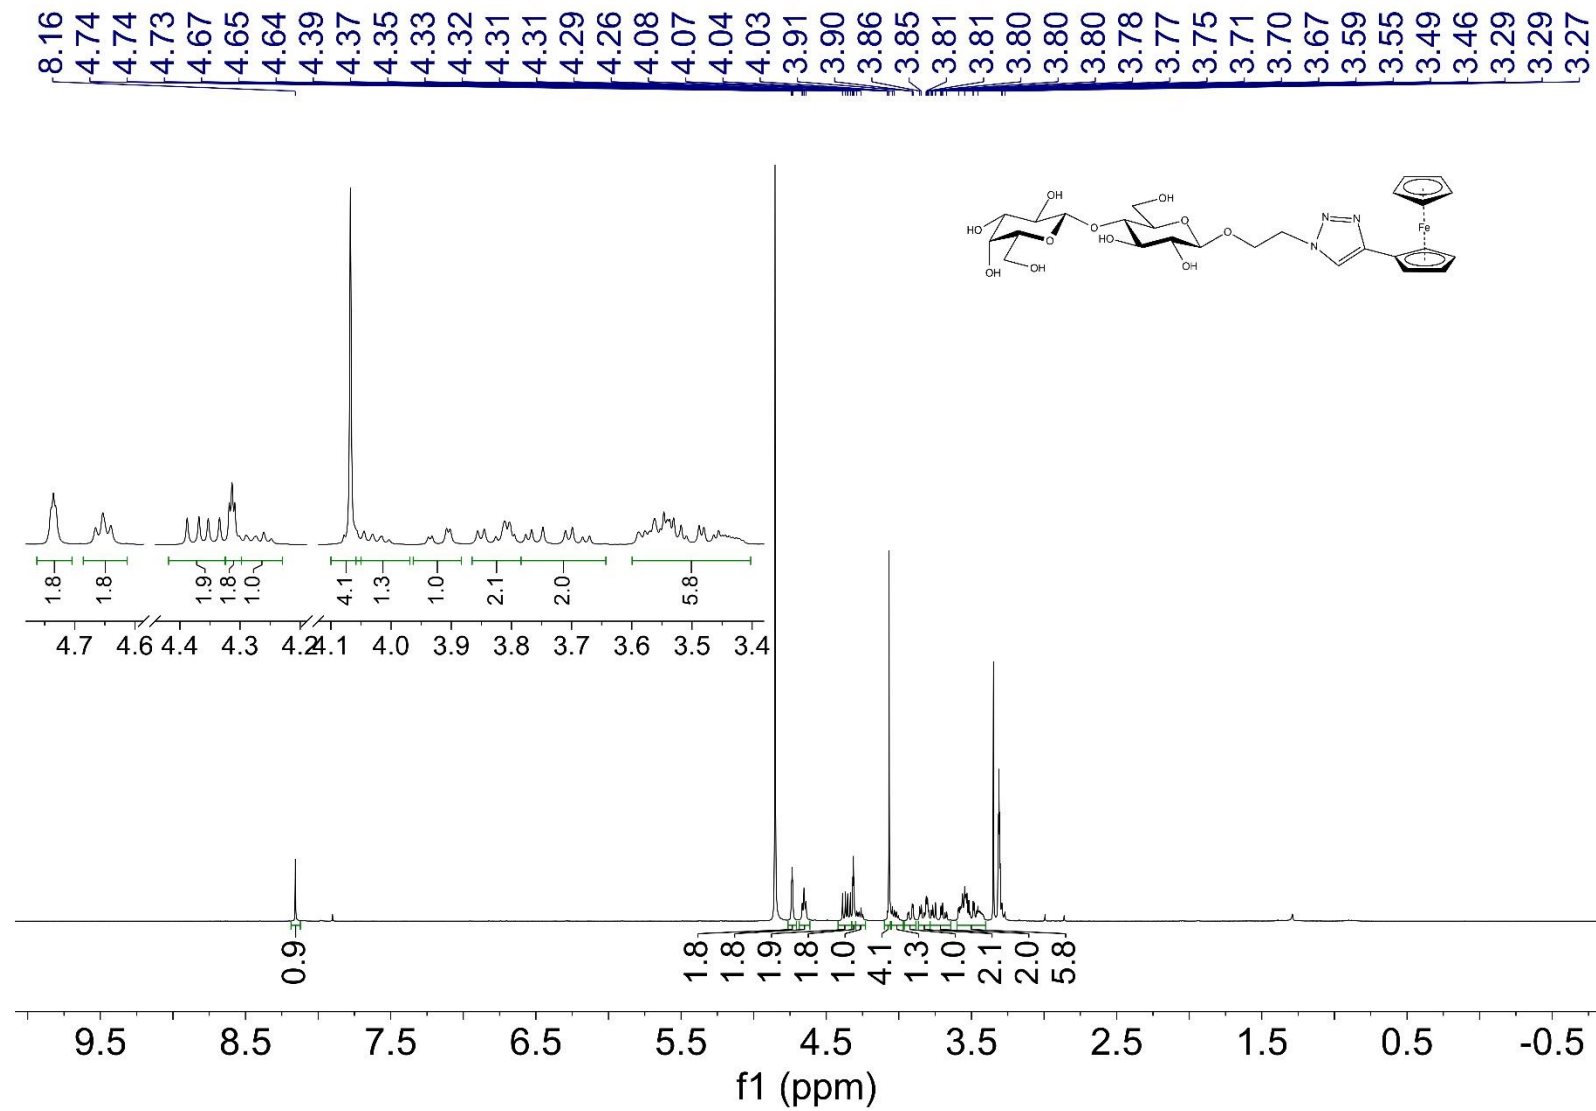

**<sup>13</sup>C NMR (101 MHz, MeOD) 10**

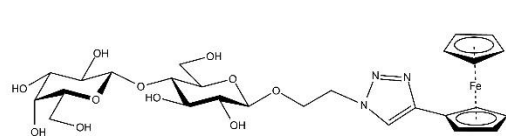

-122.91

105.11  
104.41  
80.58  
77.08  
76.60  
76.35  
74.80  
74.67  
72.53  
71.47  
70.60  
70.29  
69.14  
68.26  
62.49  
61.88  
51.58  
49.85

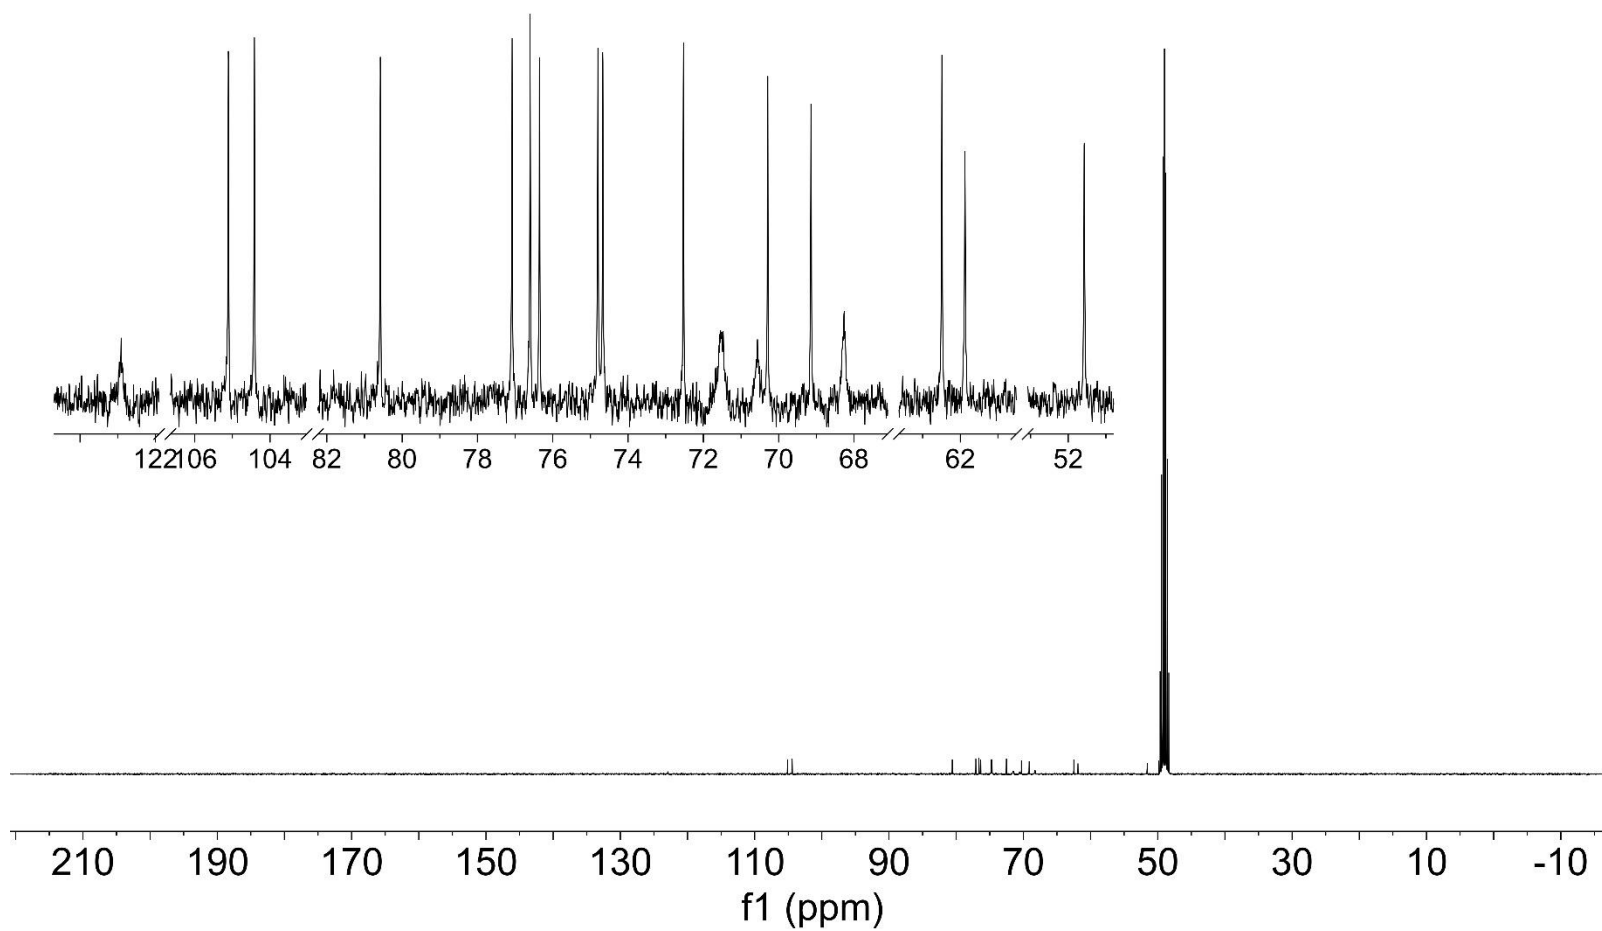

**$^1\text{H}$ - $^1\text{H}$  COSY 10**

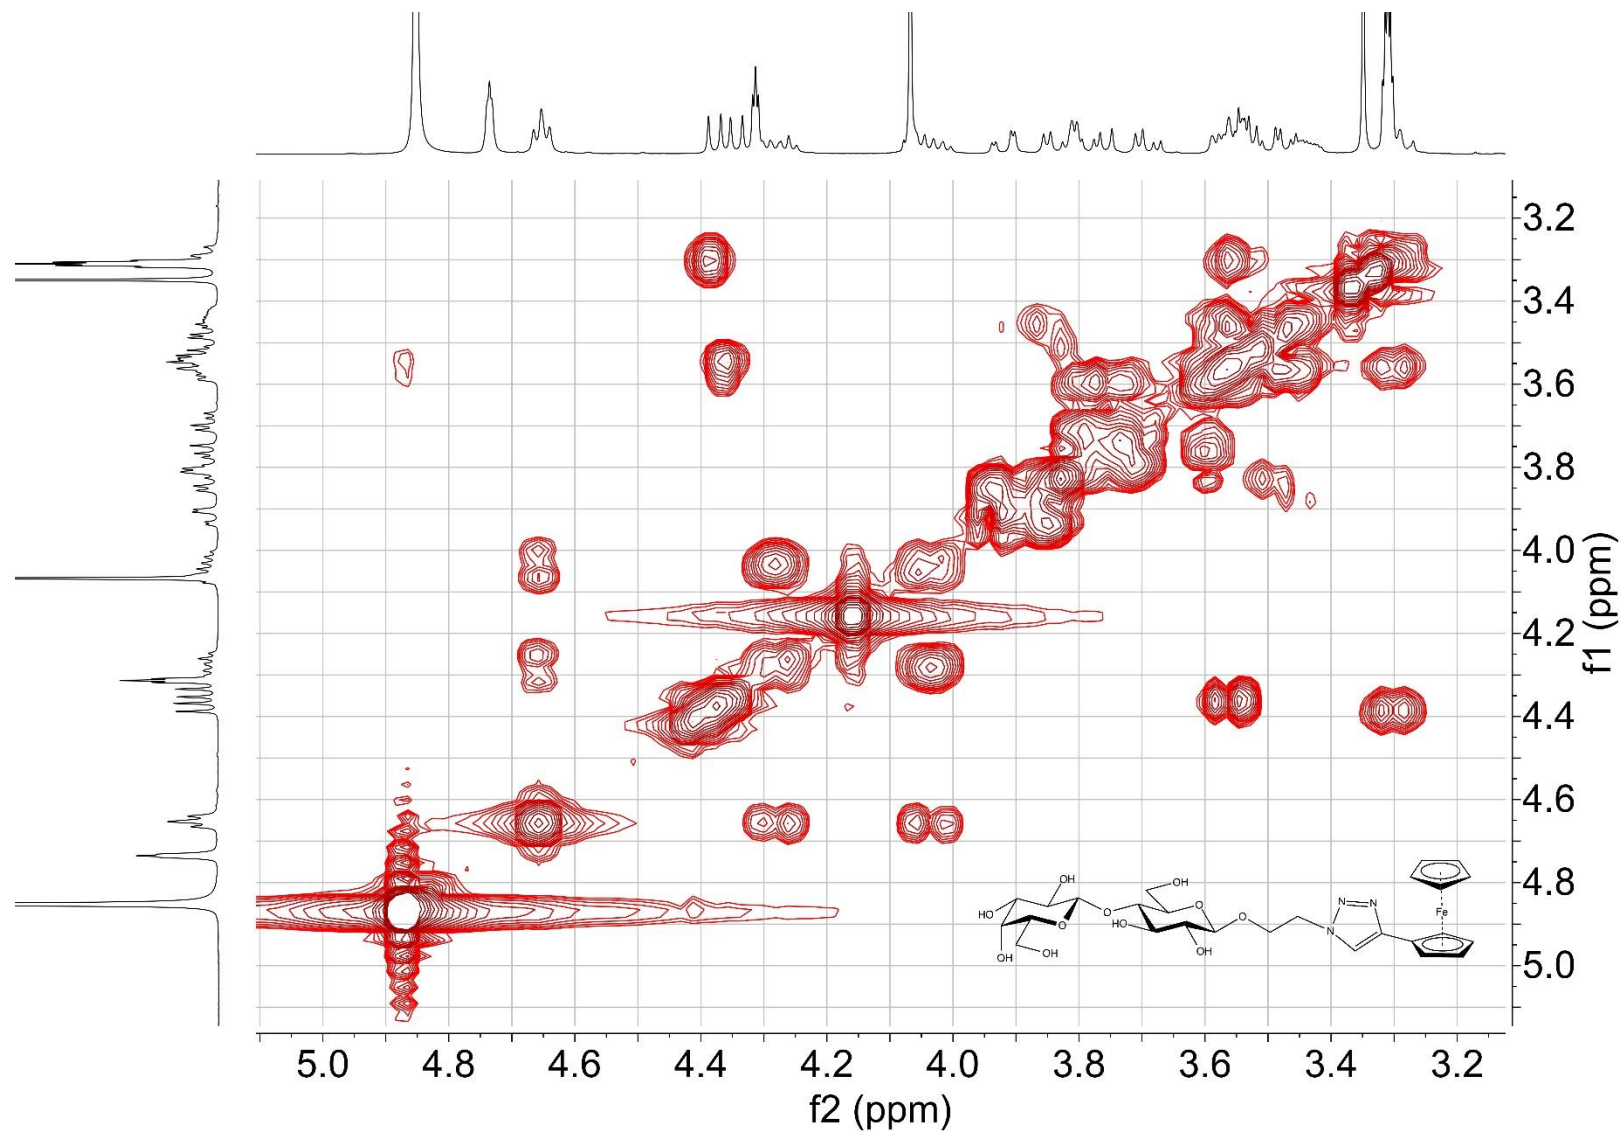

$^1\text{H}$ - $^{13}\text{C}$  HSQC 10

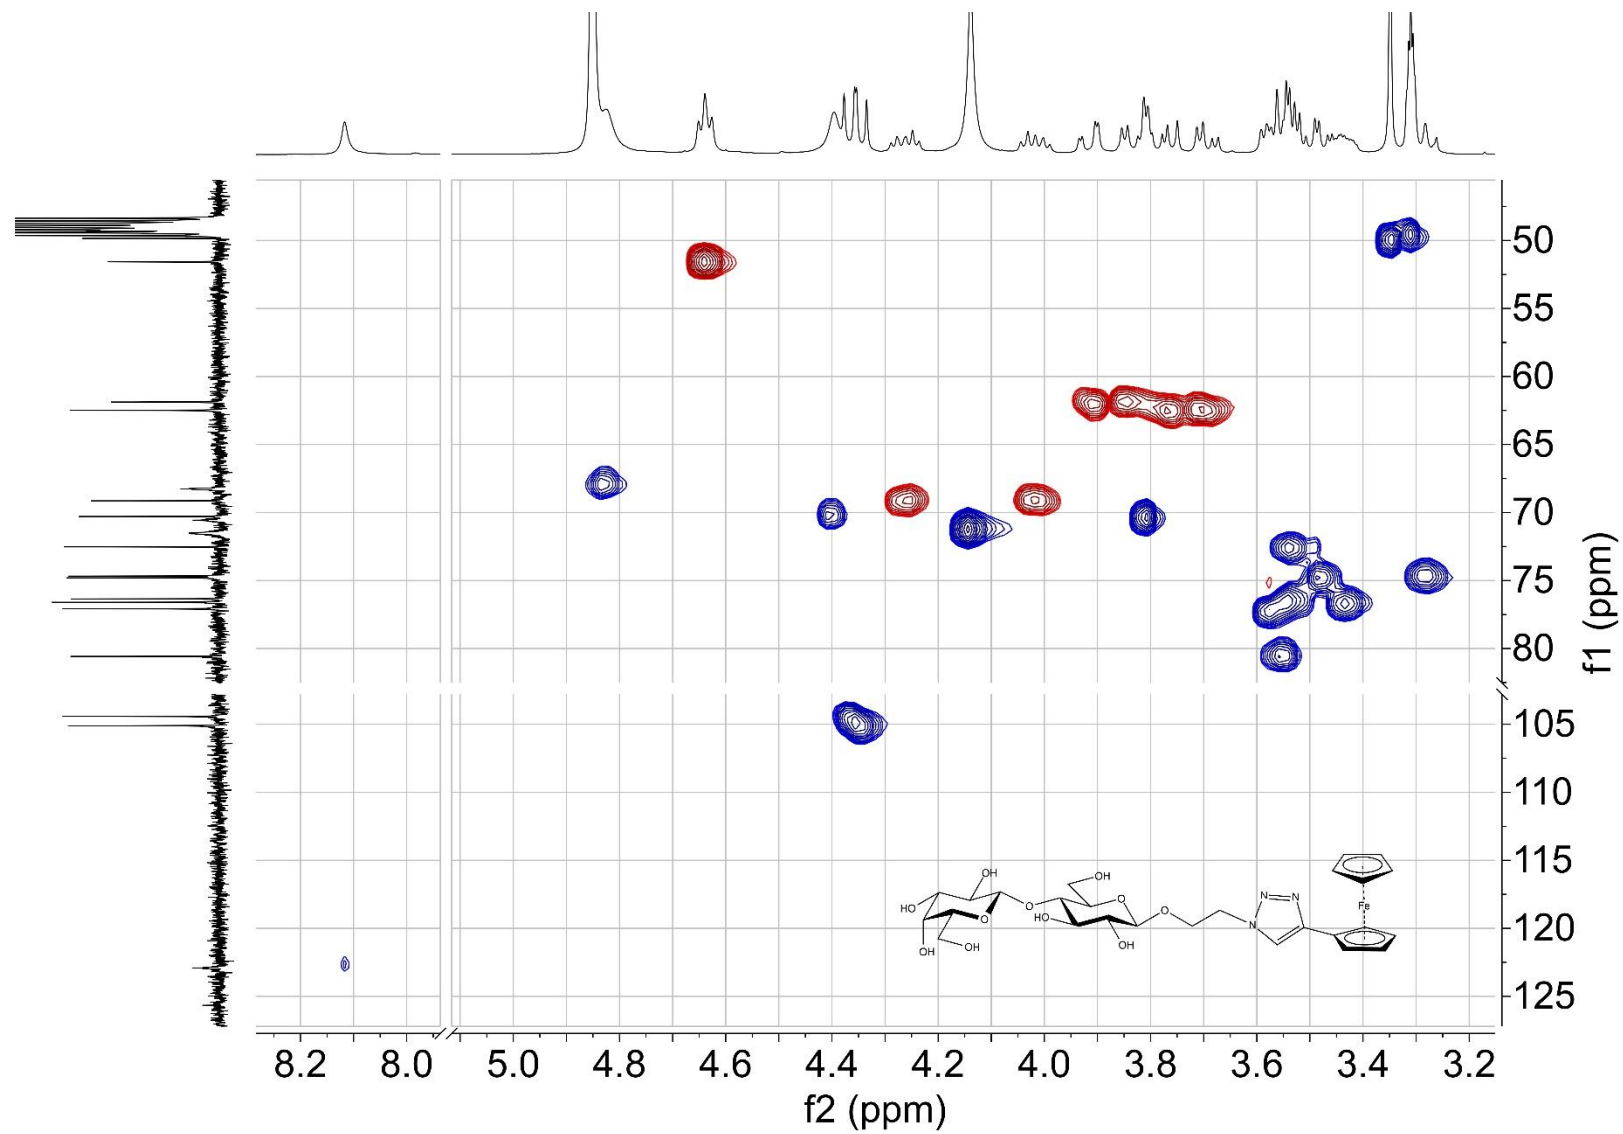



$^1\text{H}$ - $^{13}\text{C}$  HMBC 10

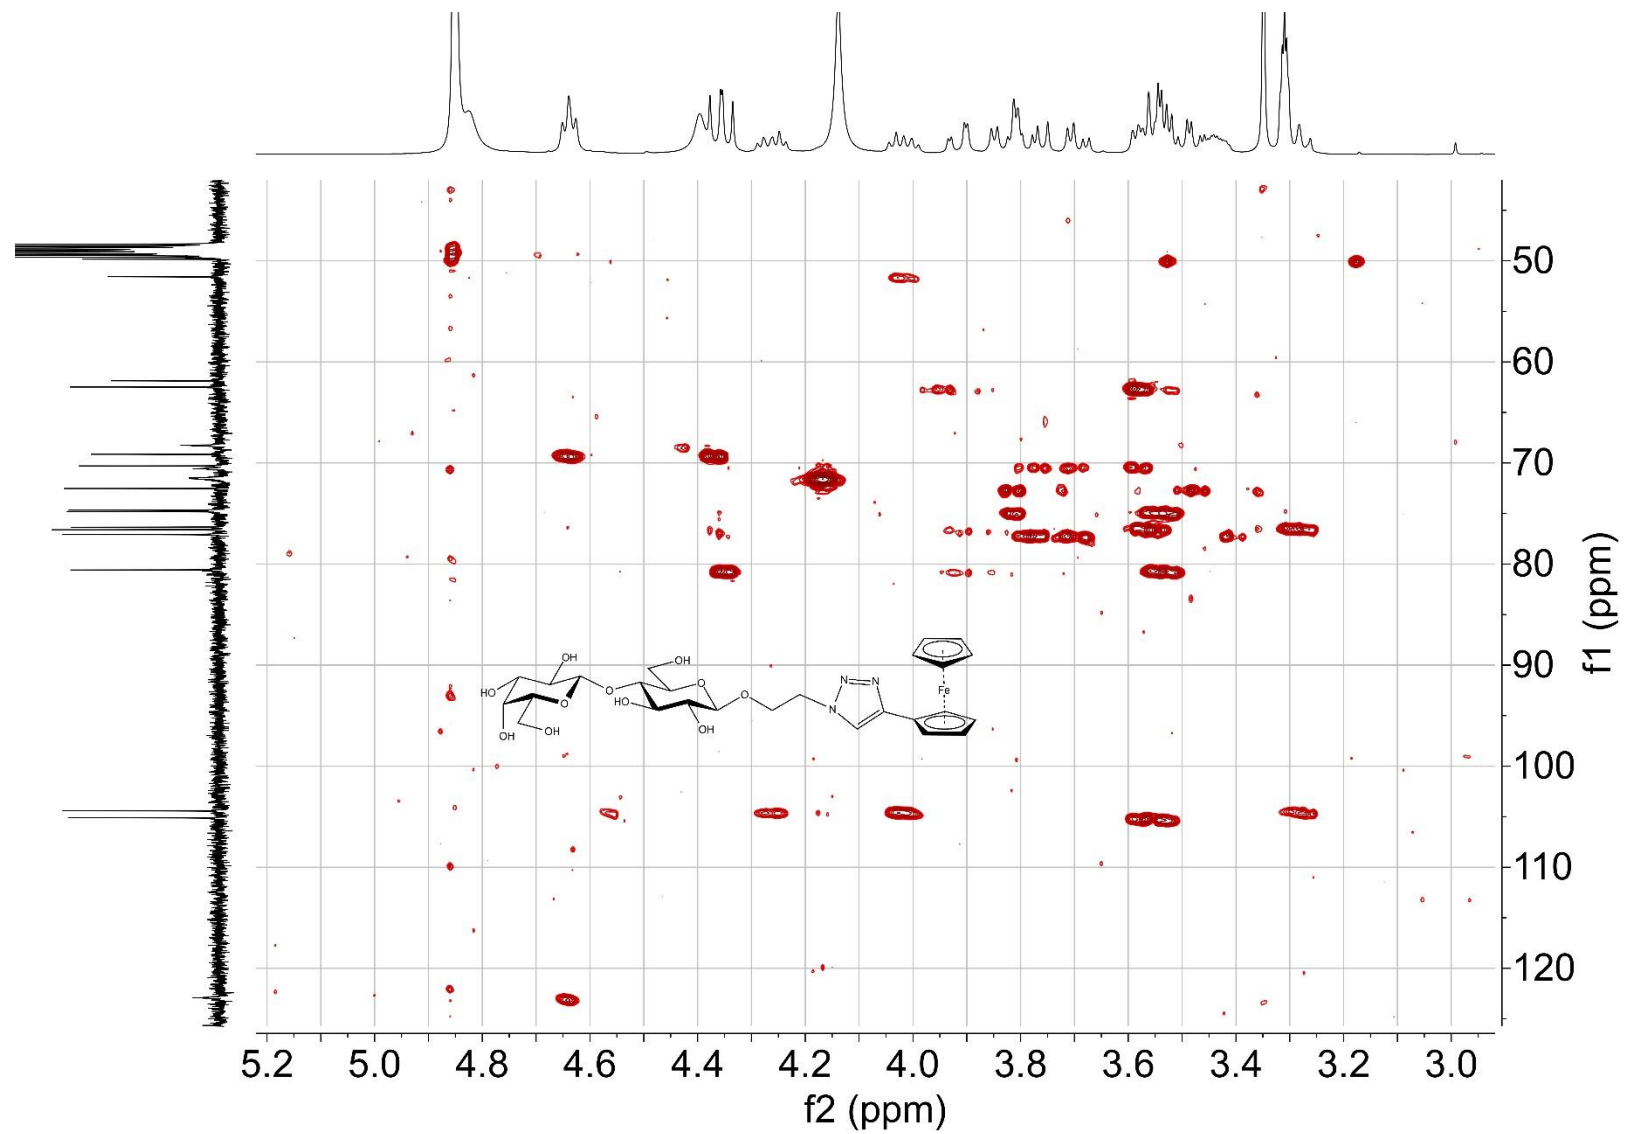

$^1\text{H}$ - $^{13}\text{C}$  HSQCTOCSY 10

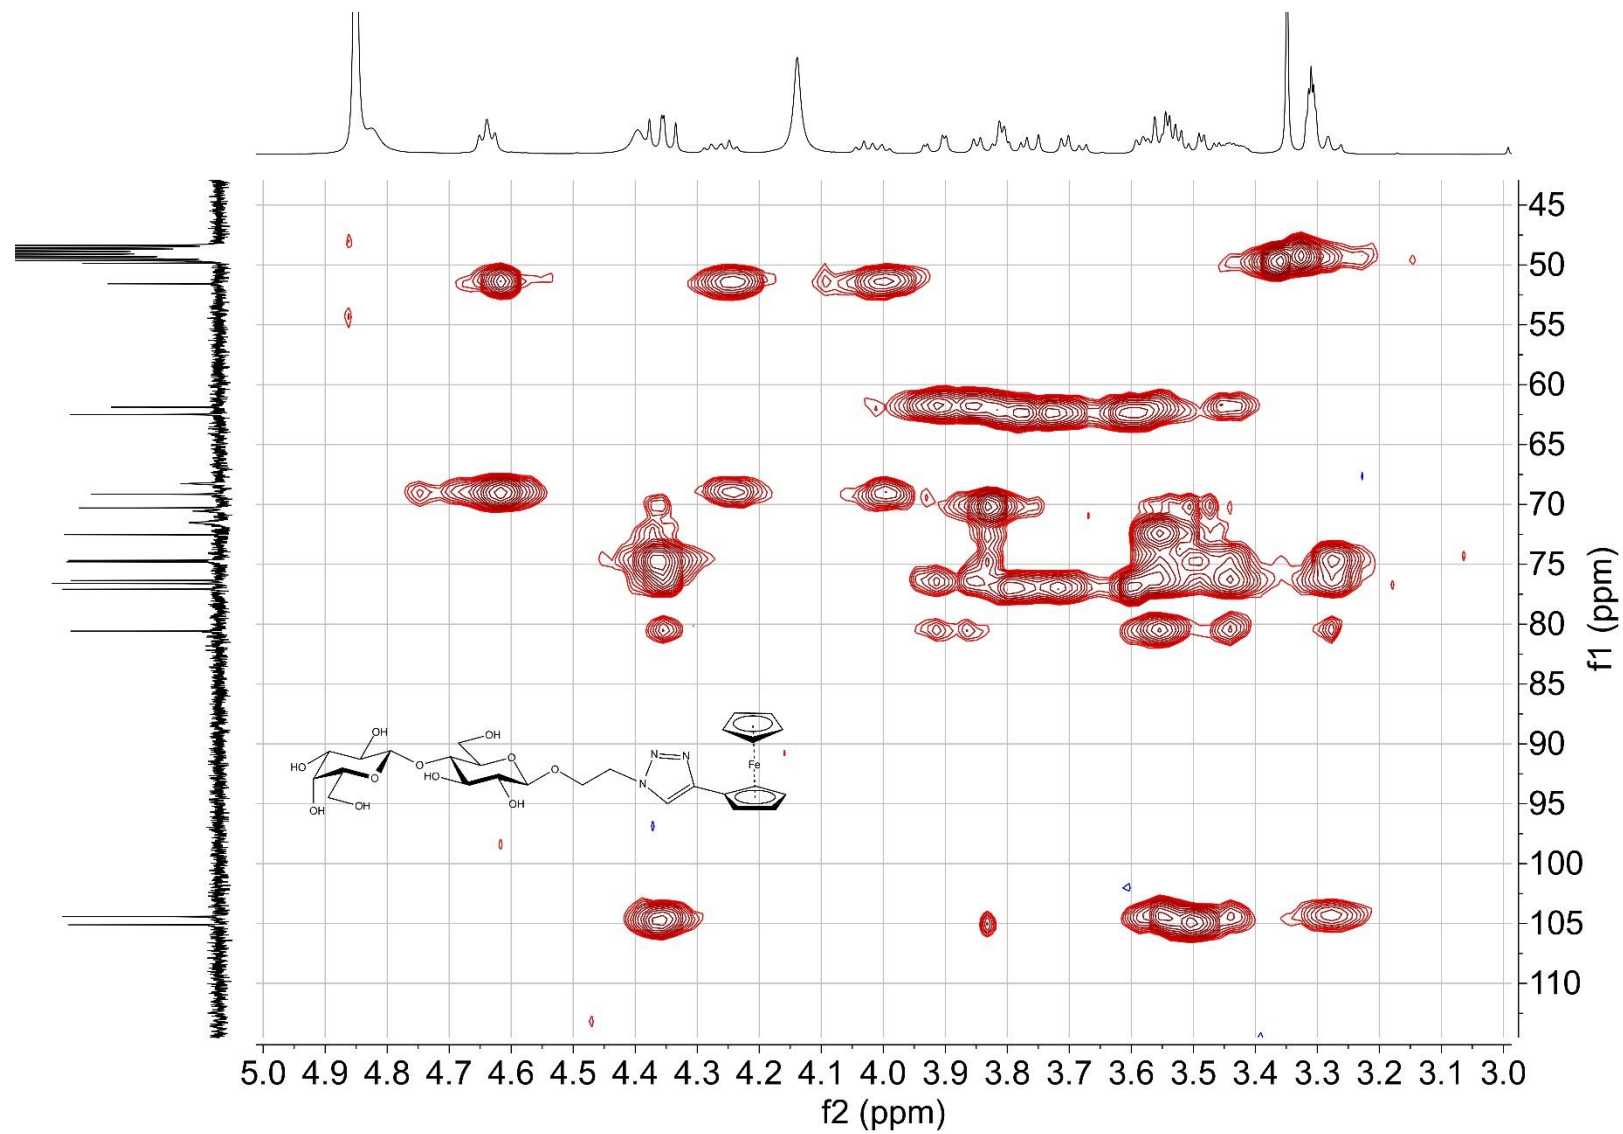

# NMR COMPOUND 13

## <sup>1</sup>H NMR (400 MHz, CDCl<sub>3</sub>) 13

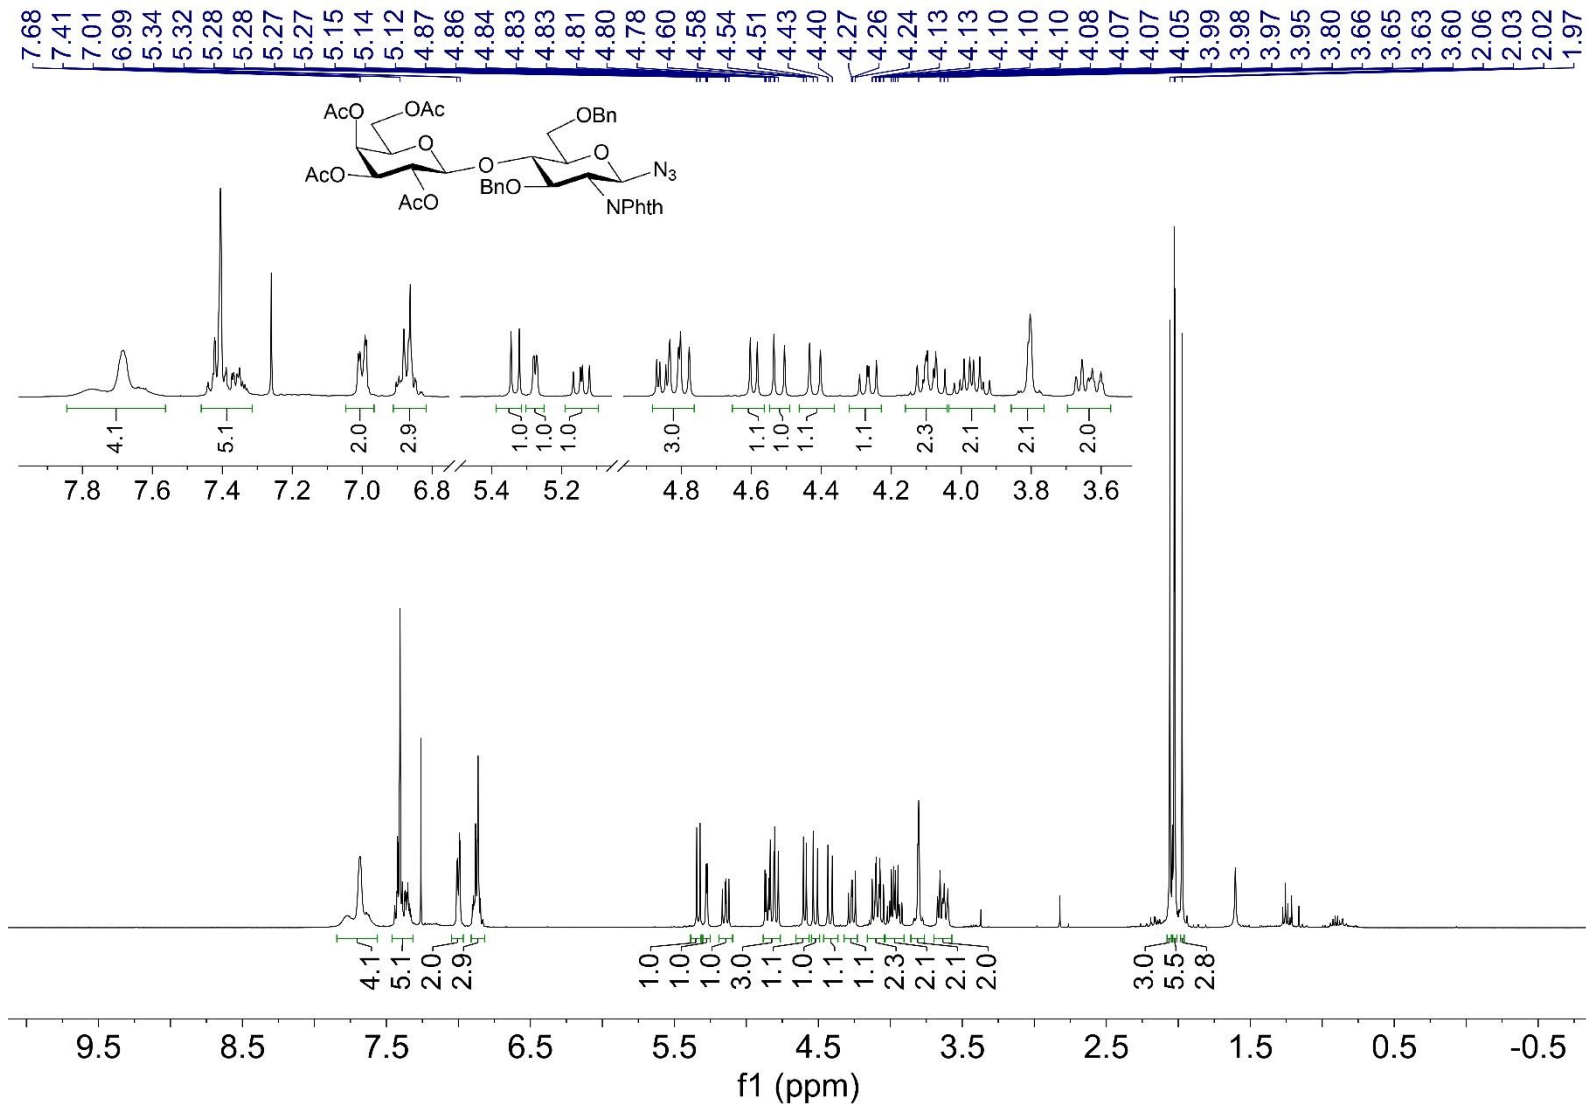

<sup>13</sup>C NMR (101 MHz, CDCl<sub>3</sub>) 13

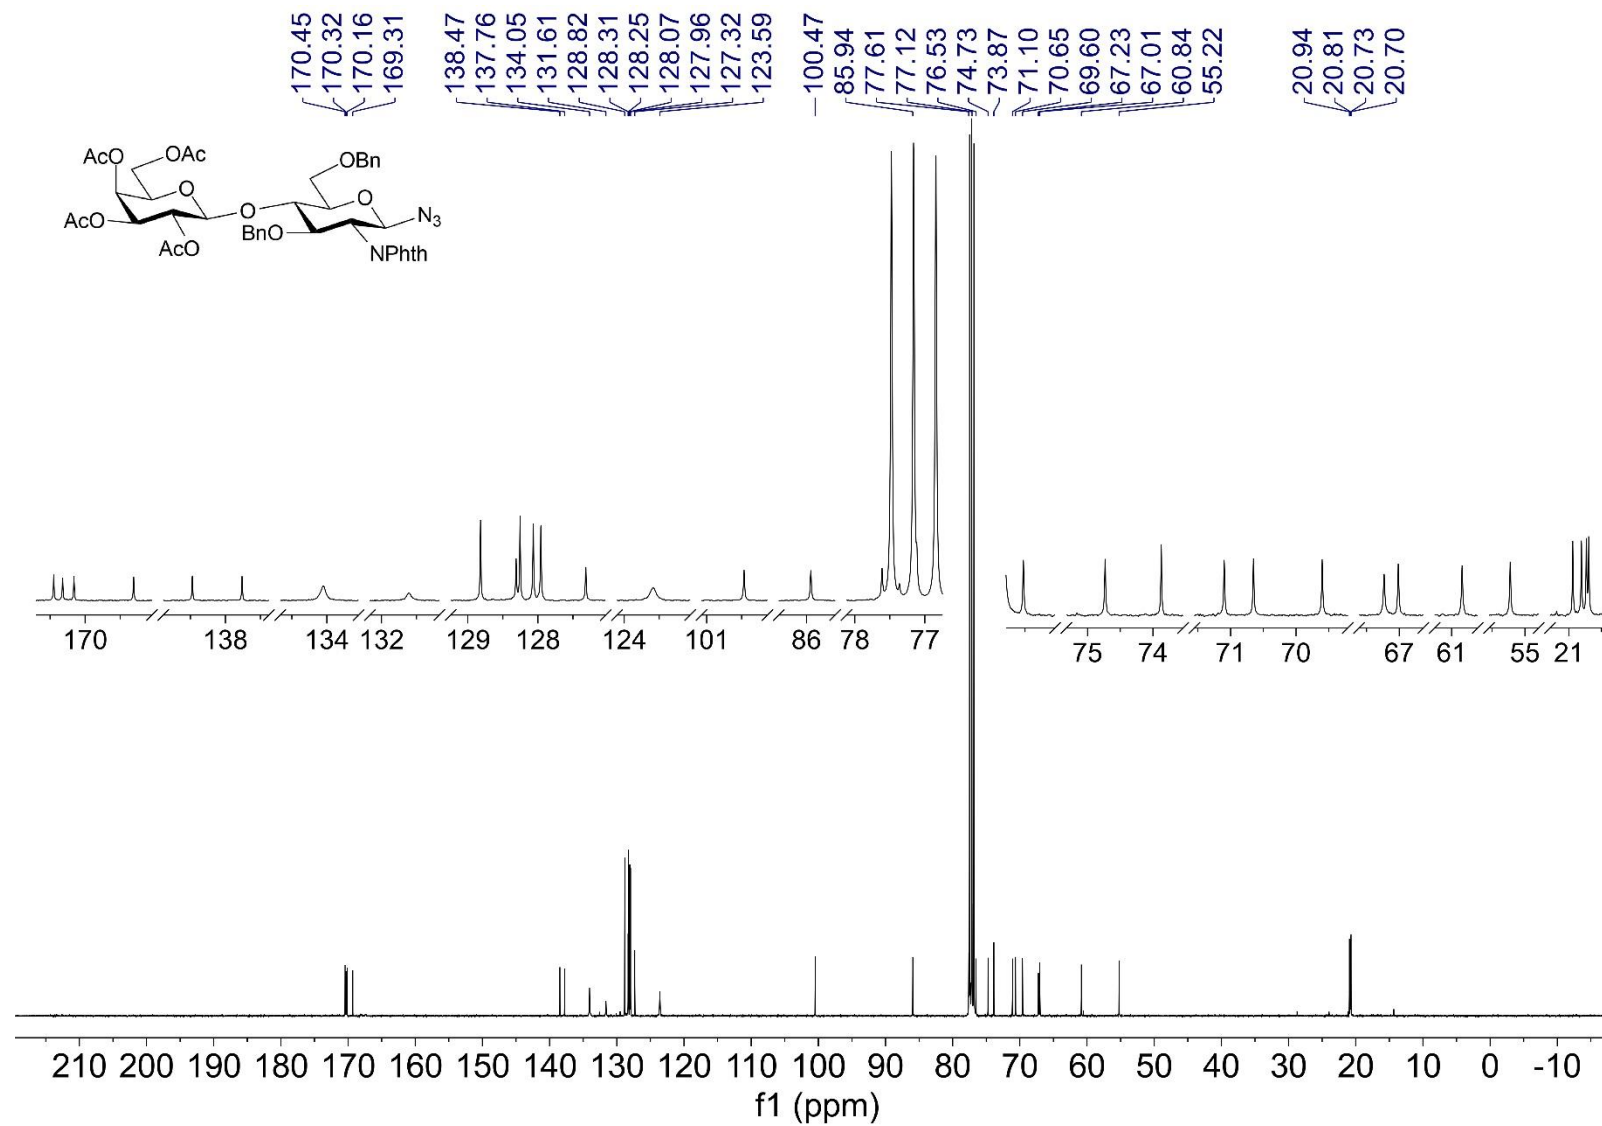

<sup>1</sup>H-<sup>1</sup>H COSY 13

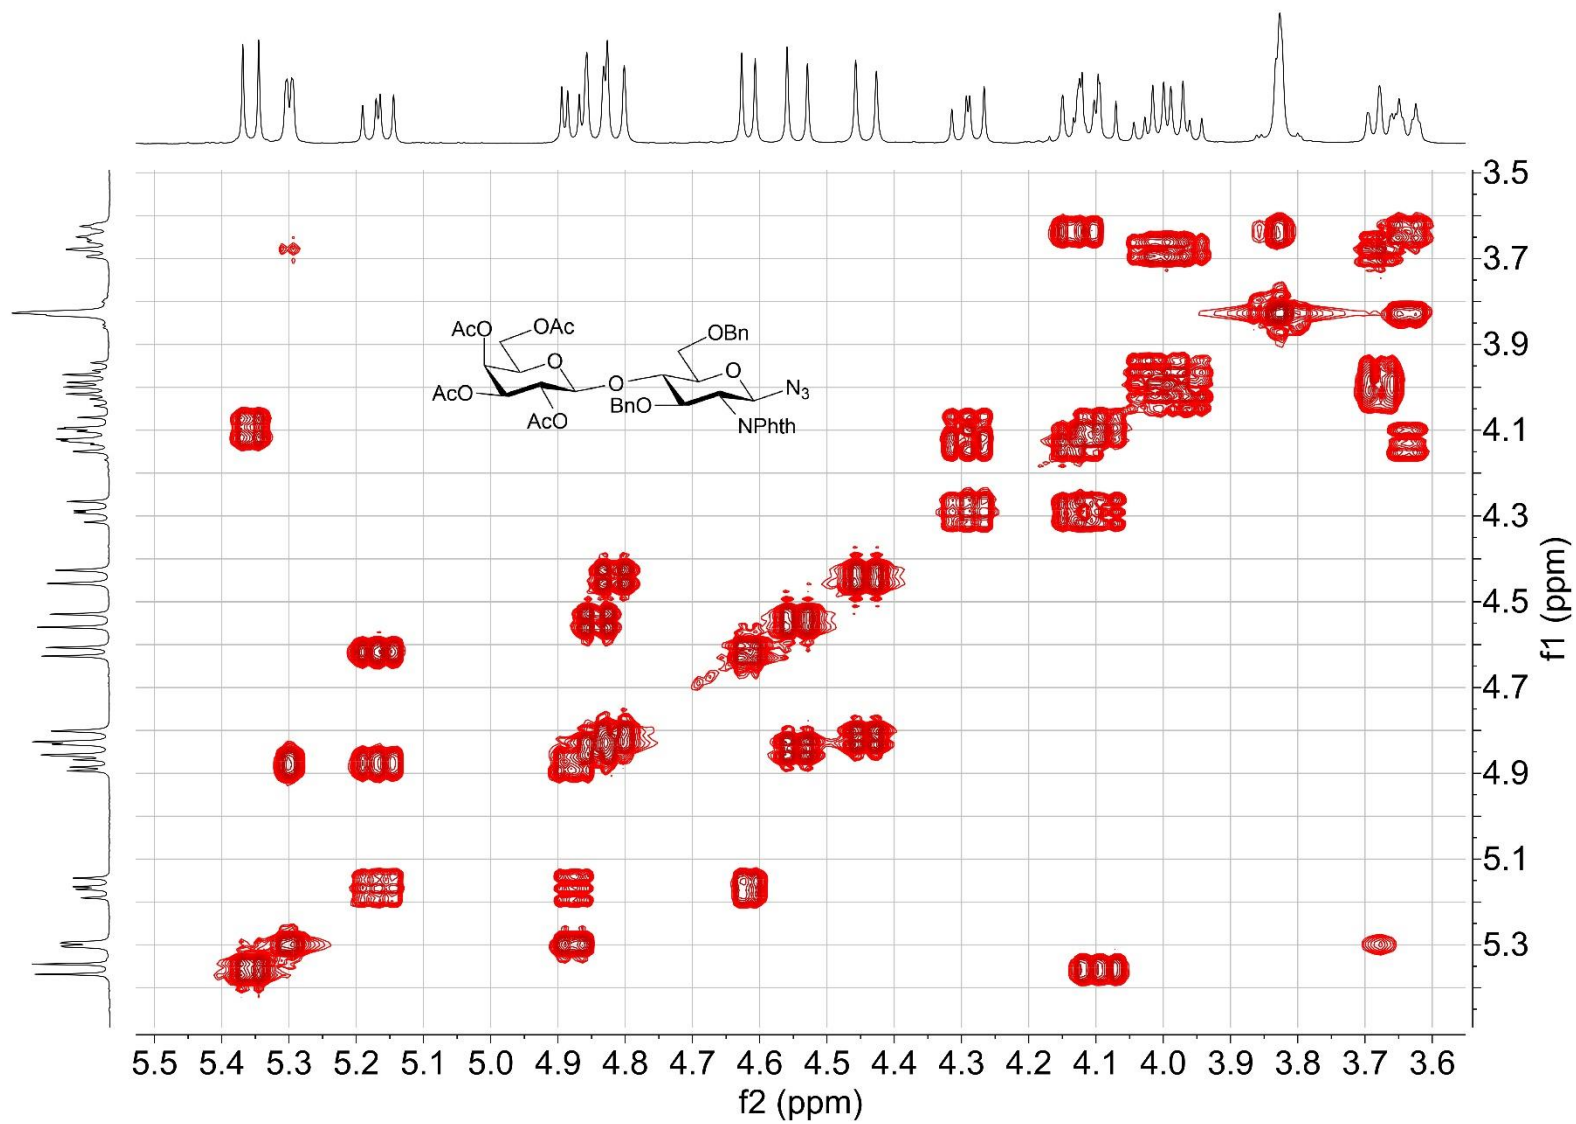

$^1\text{H}$ - $^{13}\text{C}$  HSQC 13

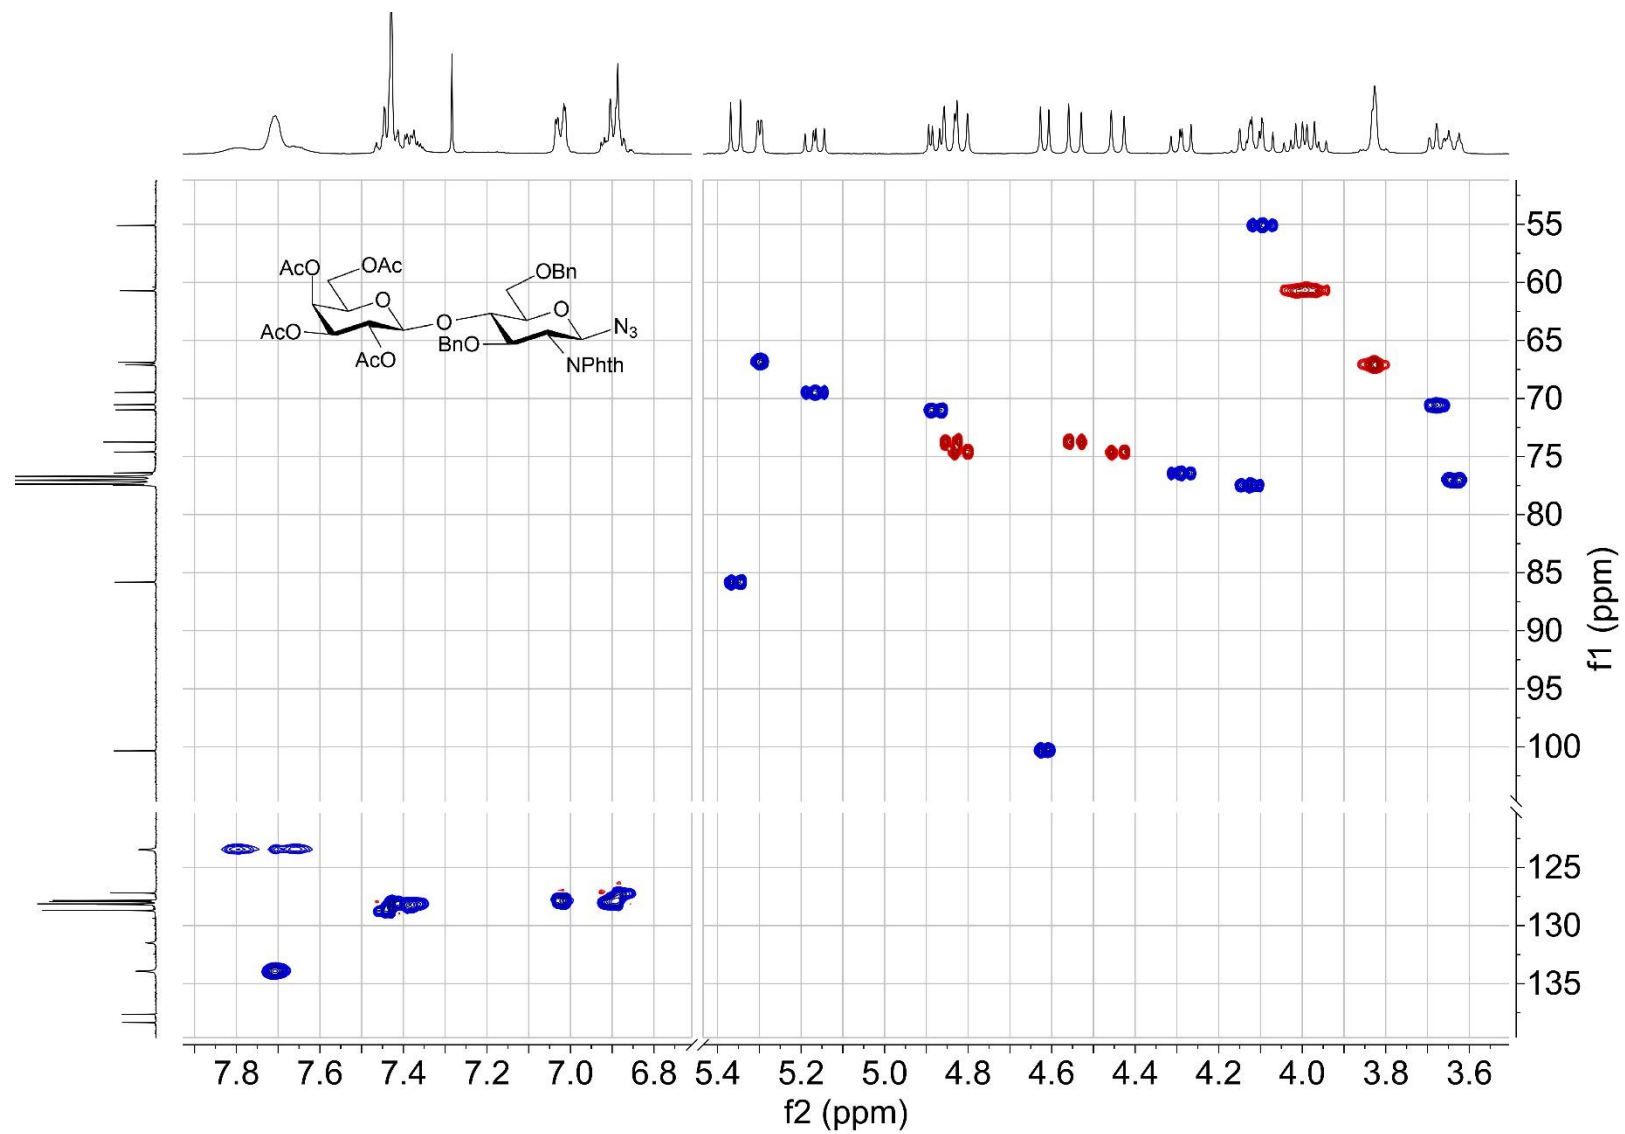

<sup>1</sup>H-<sup>13</sup>C HMBC 13

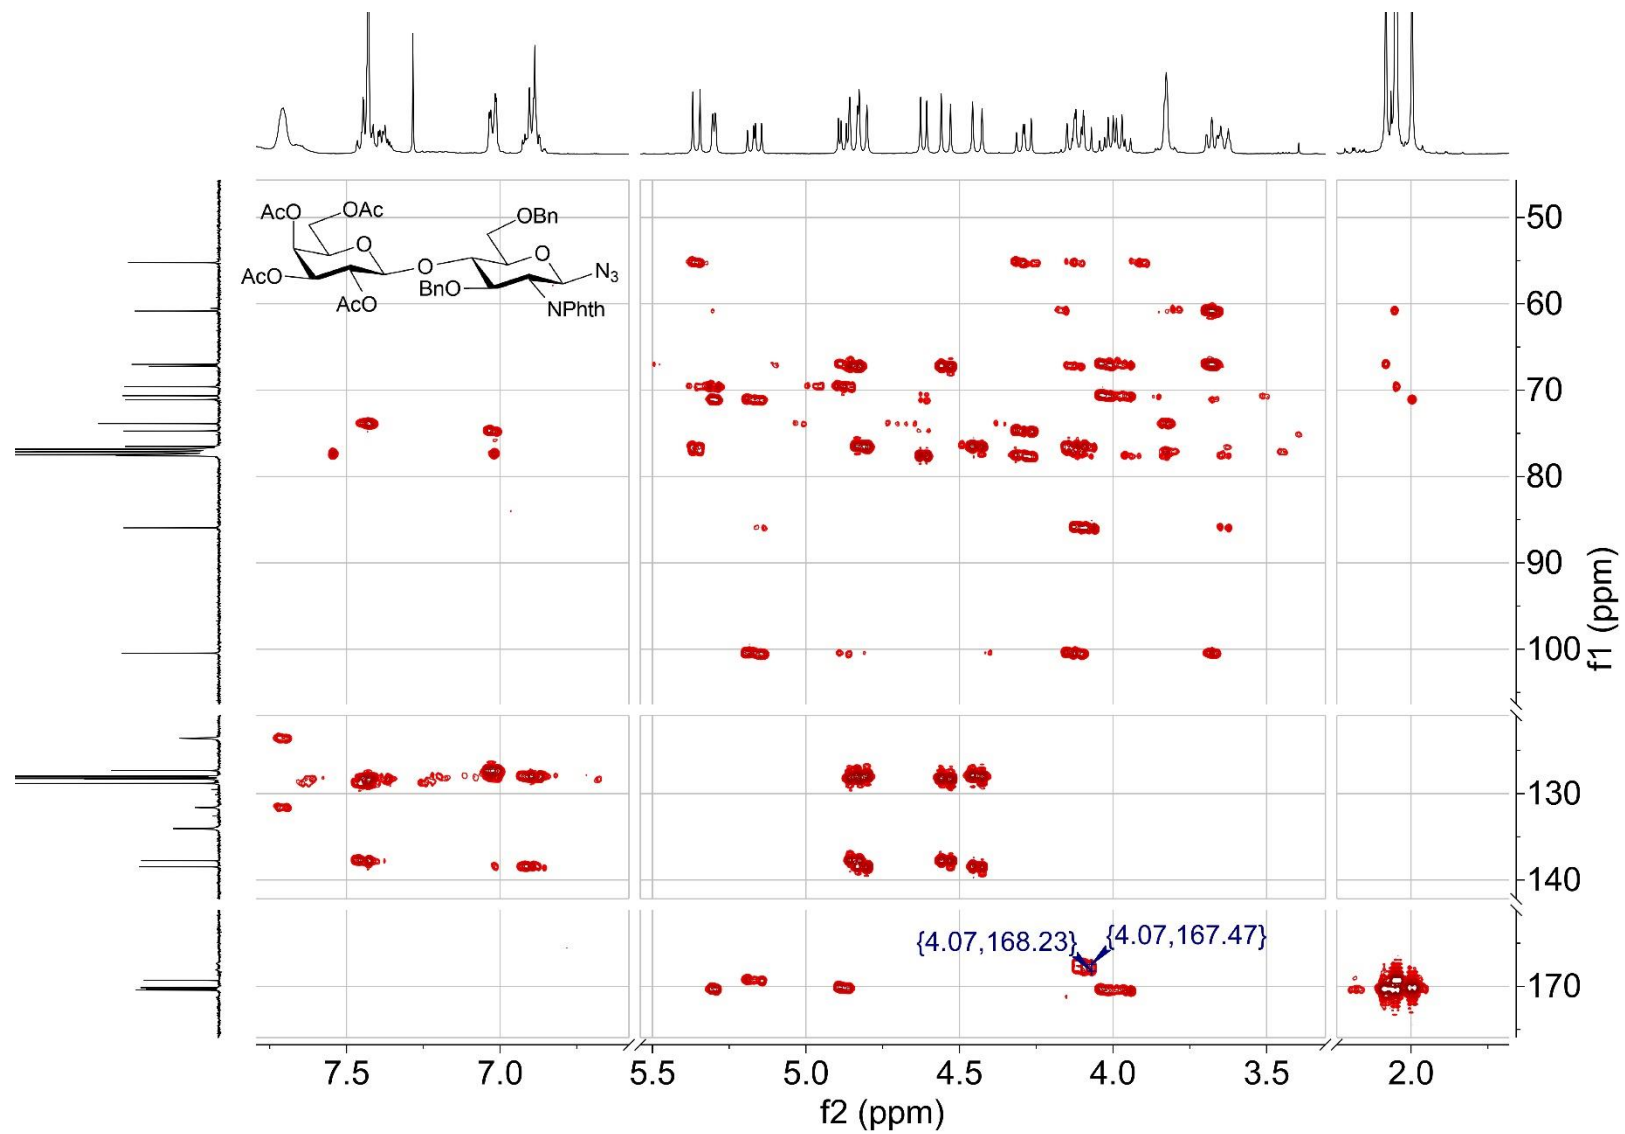

$^1\text{H}$ - $^{13}\text{C}$  HSQCTOCSY 13

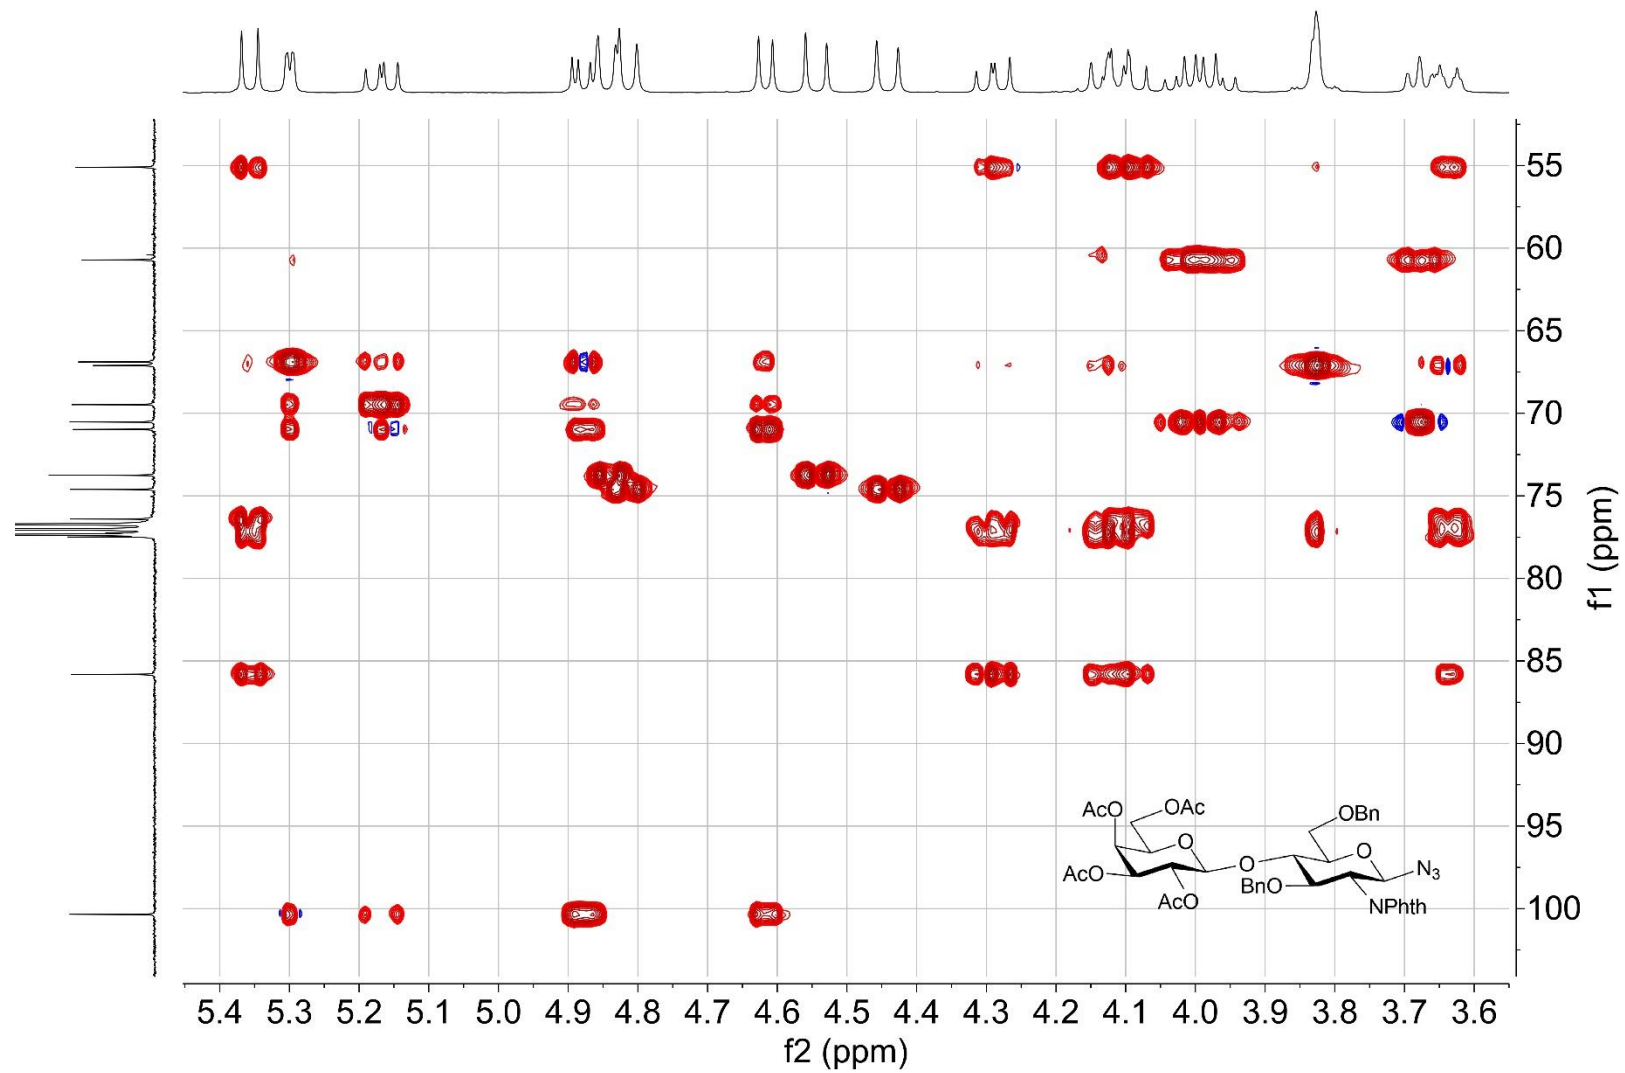



# NMR COMPOUND 14

<sup>1</sup>H NMR (400 MHz, CDCl<sub>3</sub>) 14

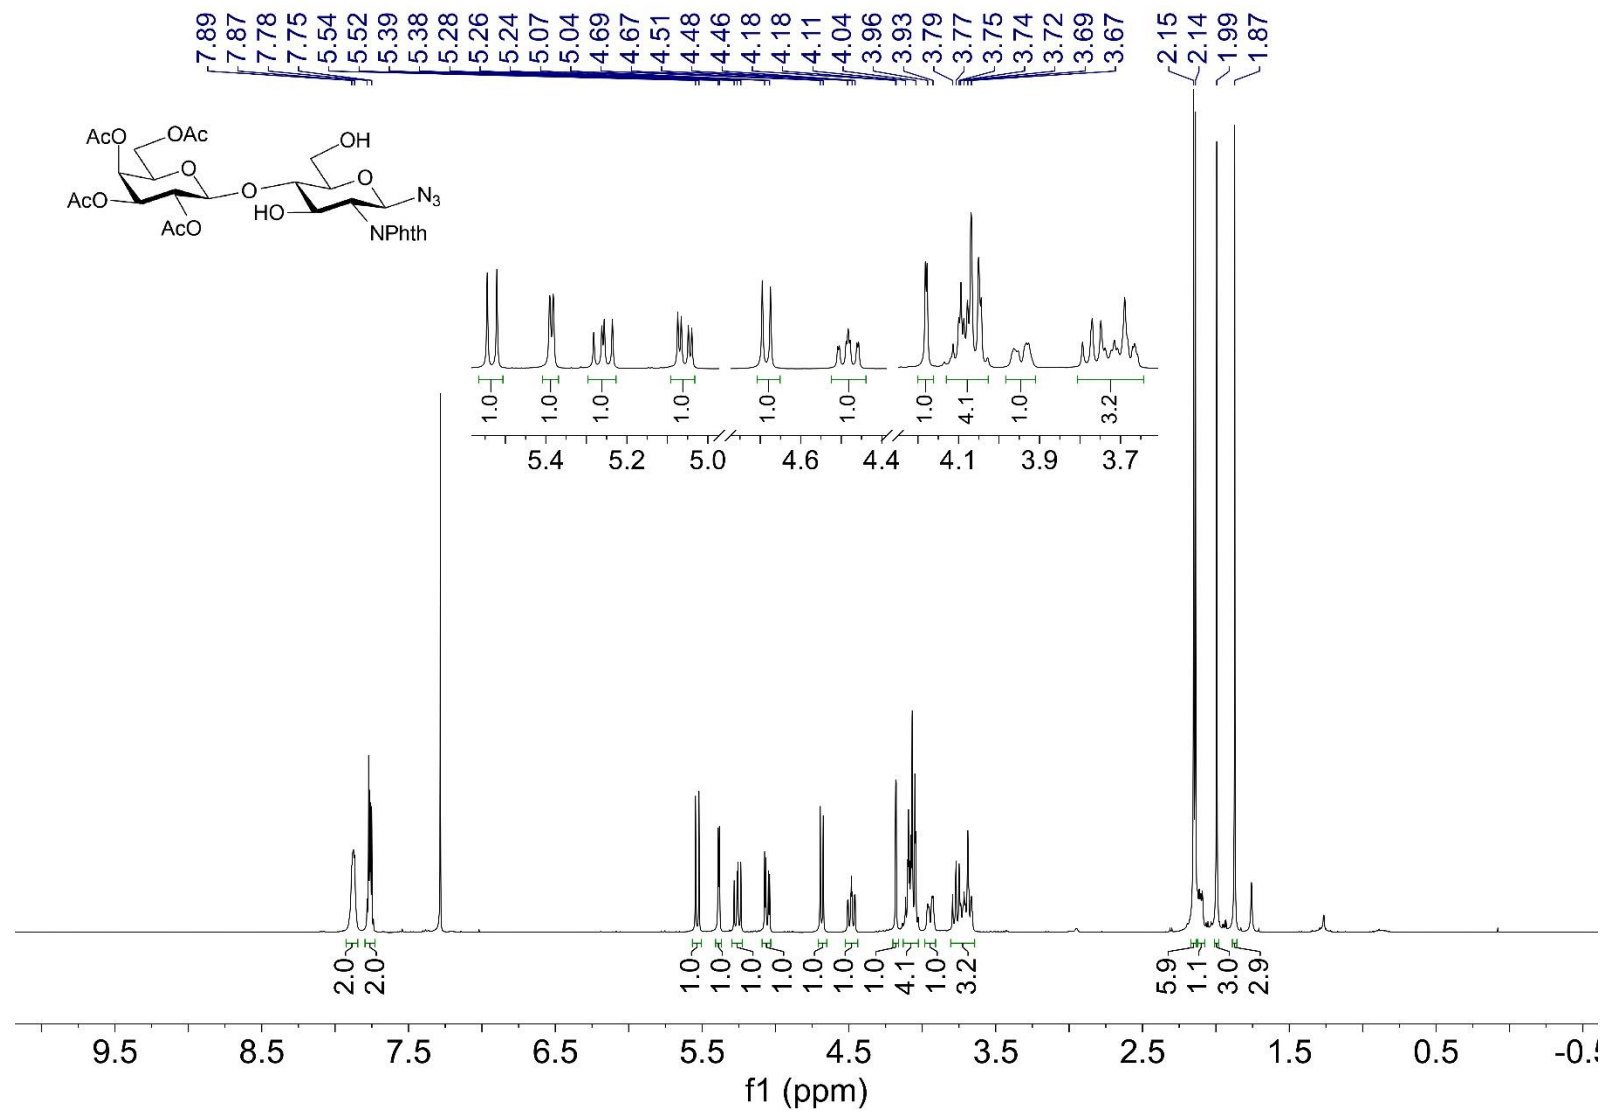

<sup>13</sup>C NMR (101 MHz, CDCl<sub>3</sub>) 14

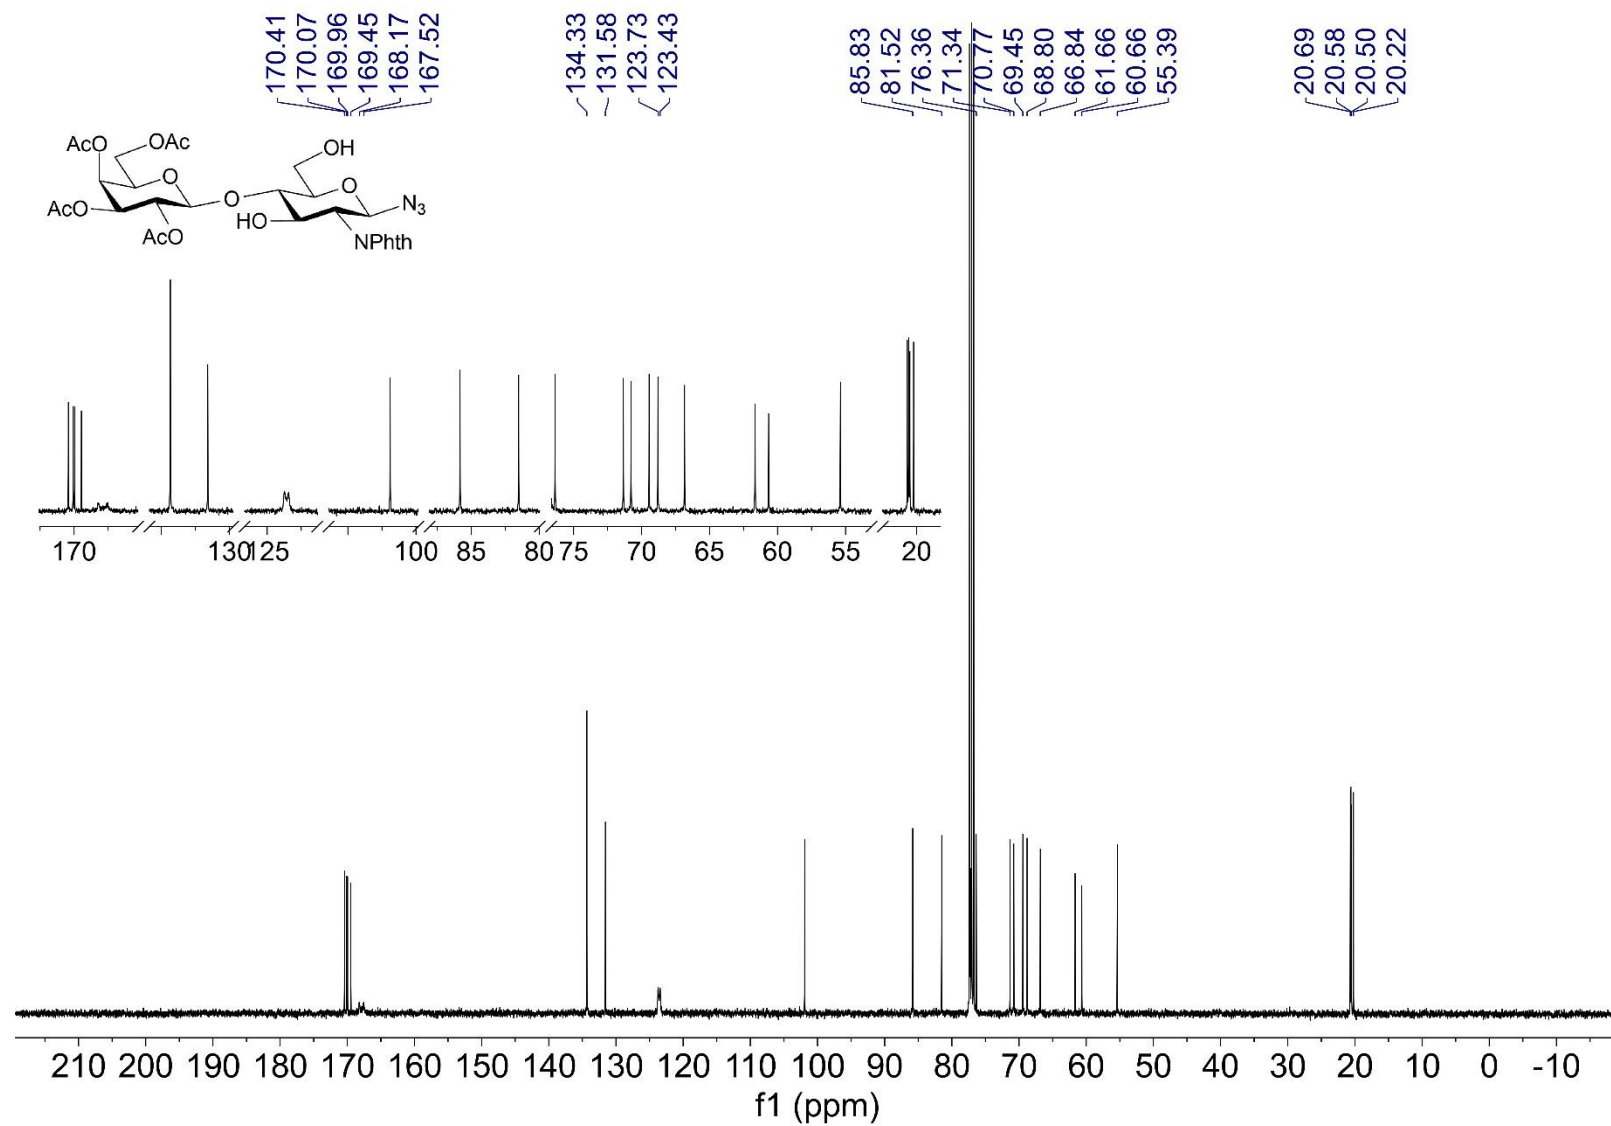

# NMR COMPOUND 15

<sup>1</sup>H NMR (400 MHz, MeOD) 15

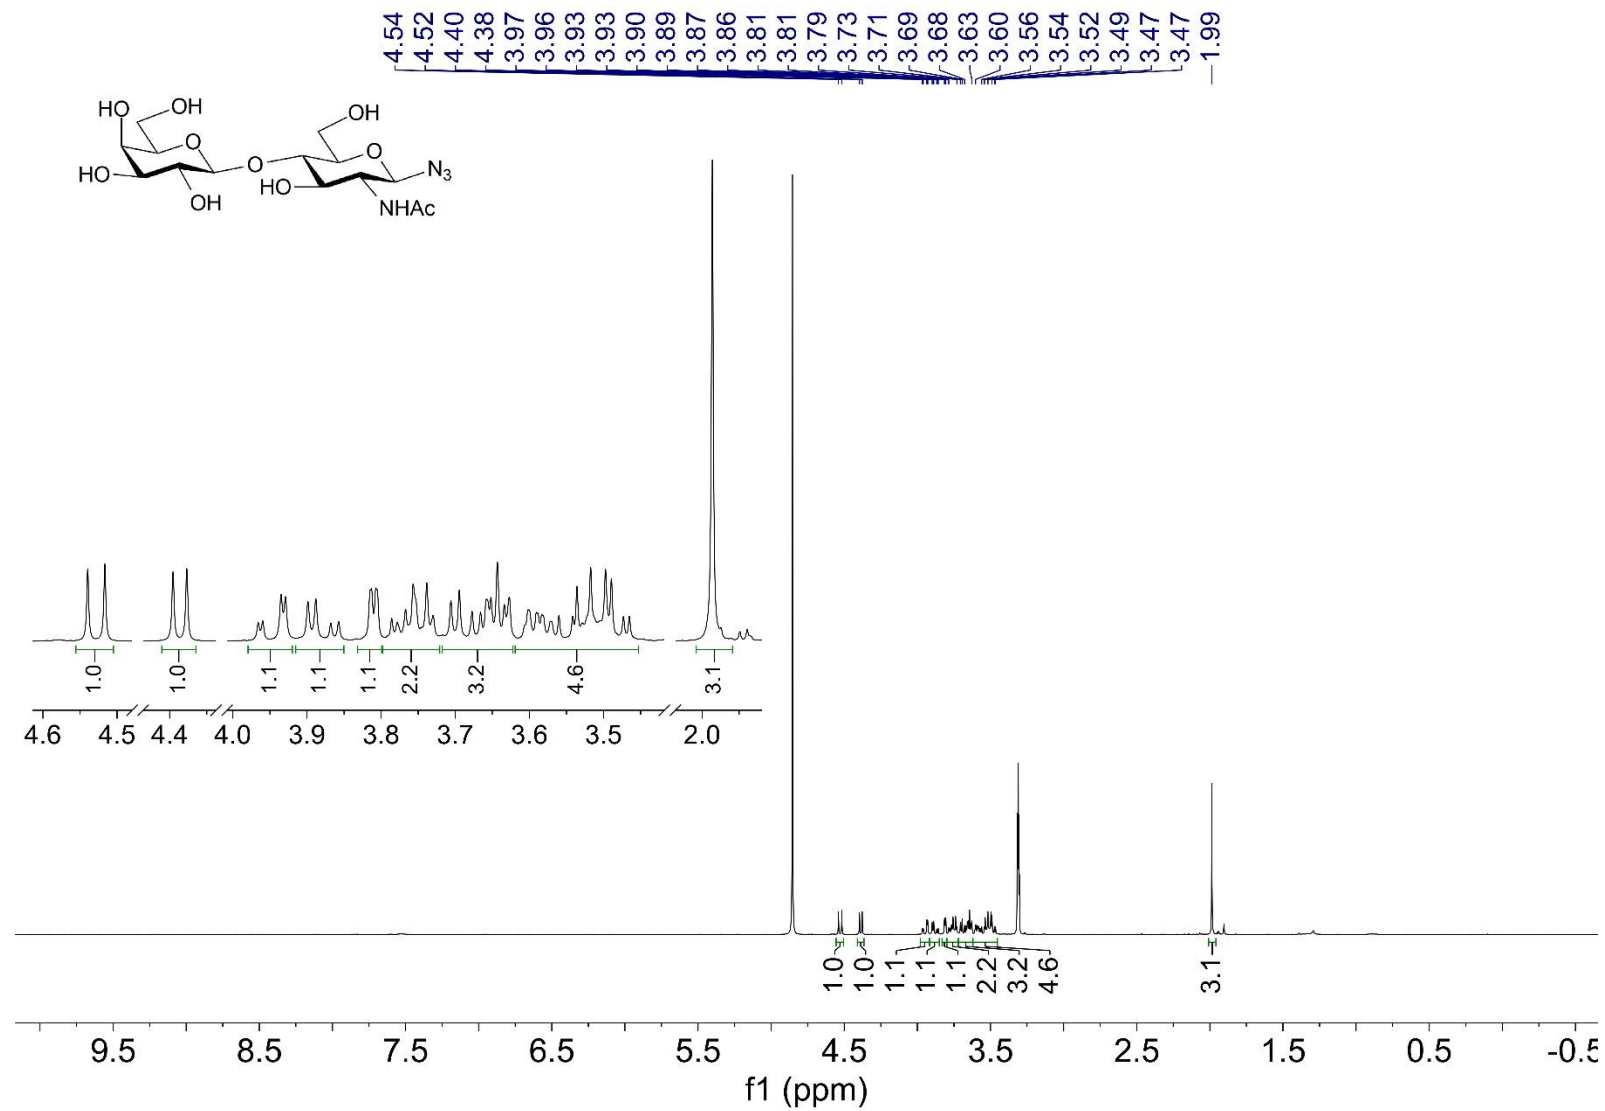

<sup>13</sup>C NMR (101 MHz, MeOD) 15

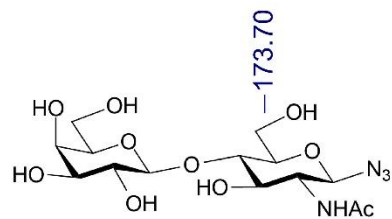

- 105.06
- 90.15
- 80.36
- 78.87
- 77.16
- 74.82
- 74.04
- 72.58
- 70.31
- 62.51
- 61.70
- 56.10
- 22.82

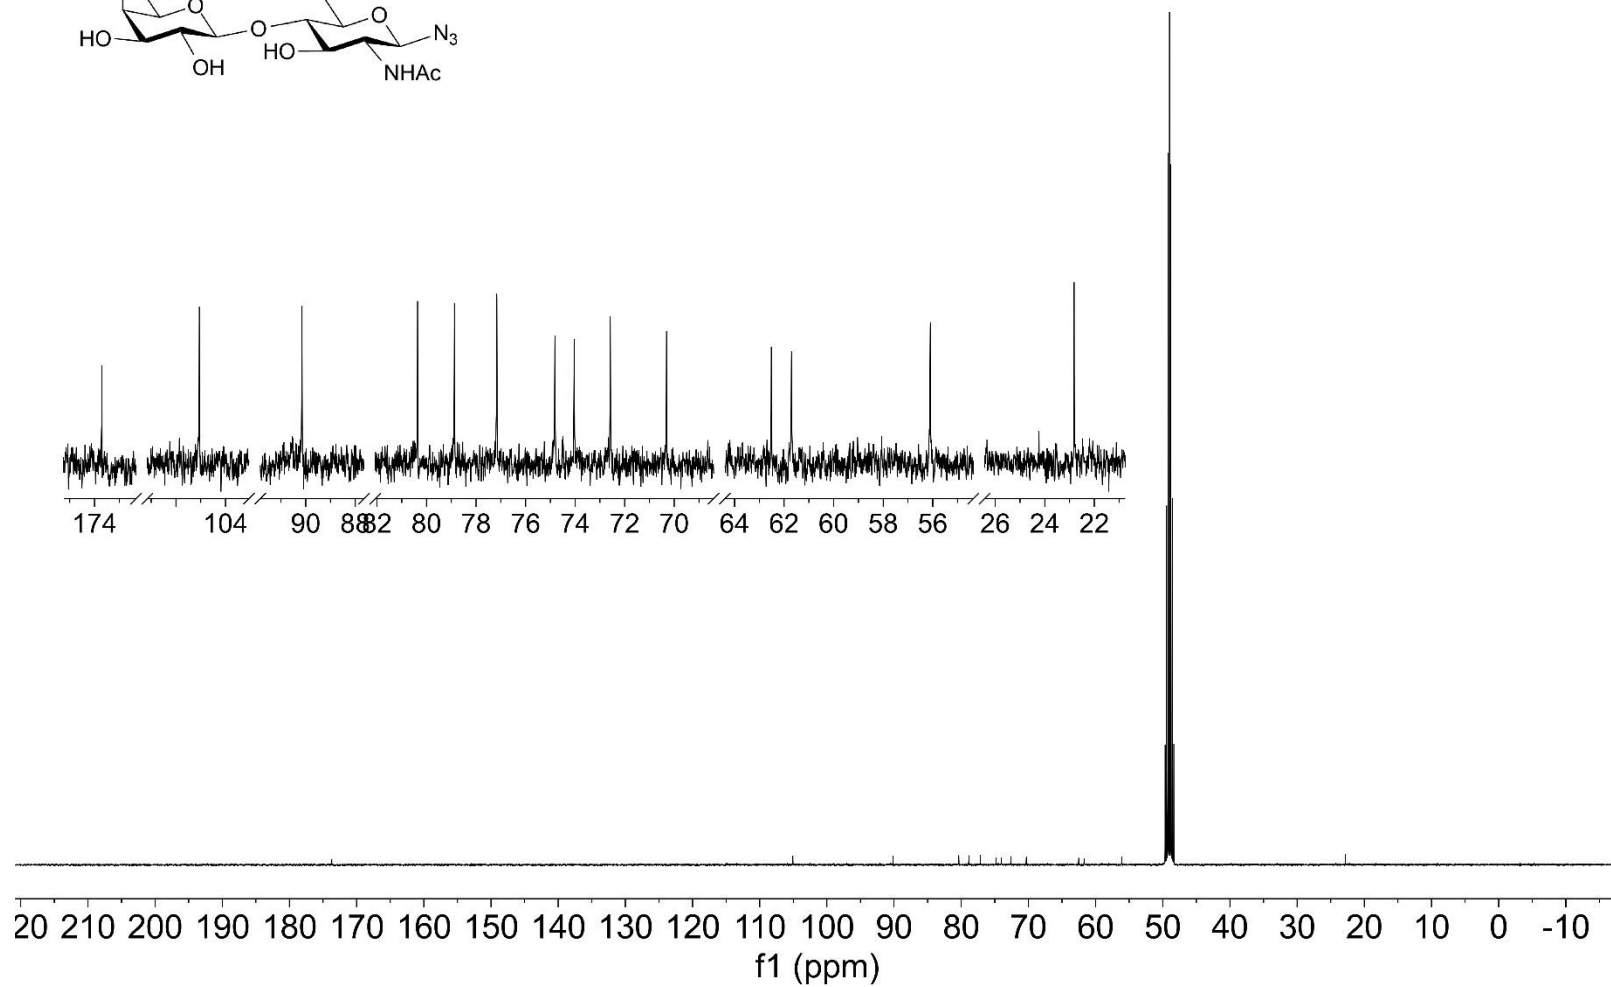

<sup>1</sup>H-<sup>1</sup>H COSY 15

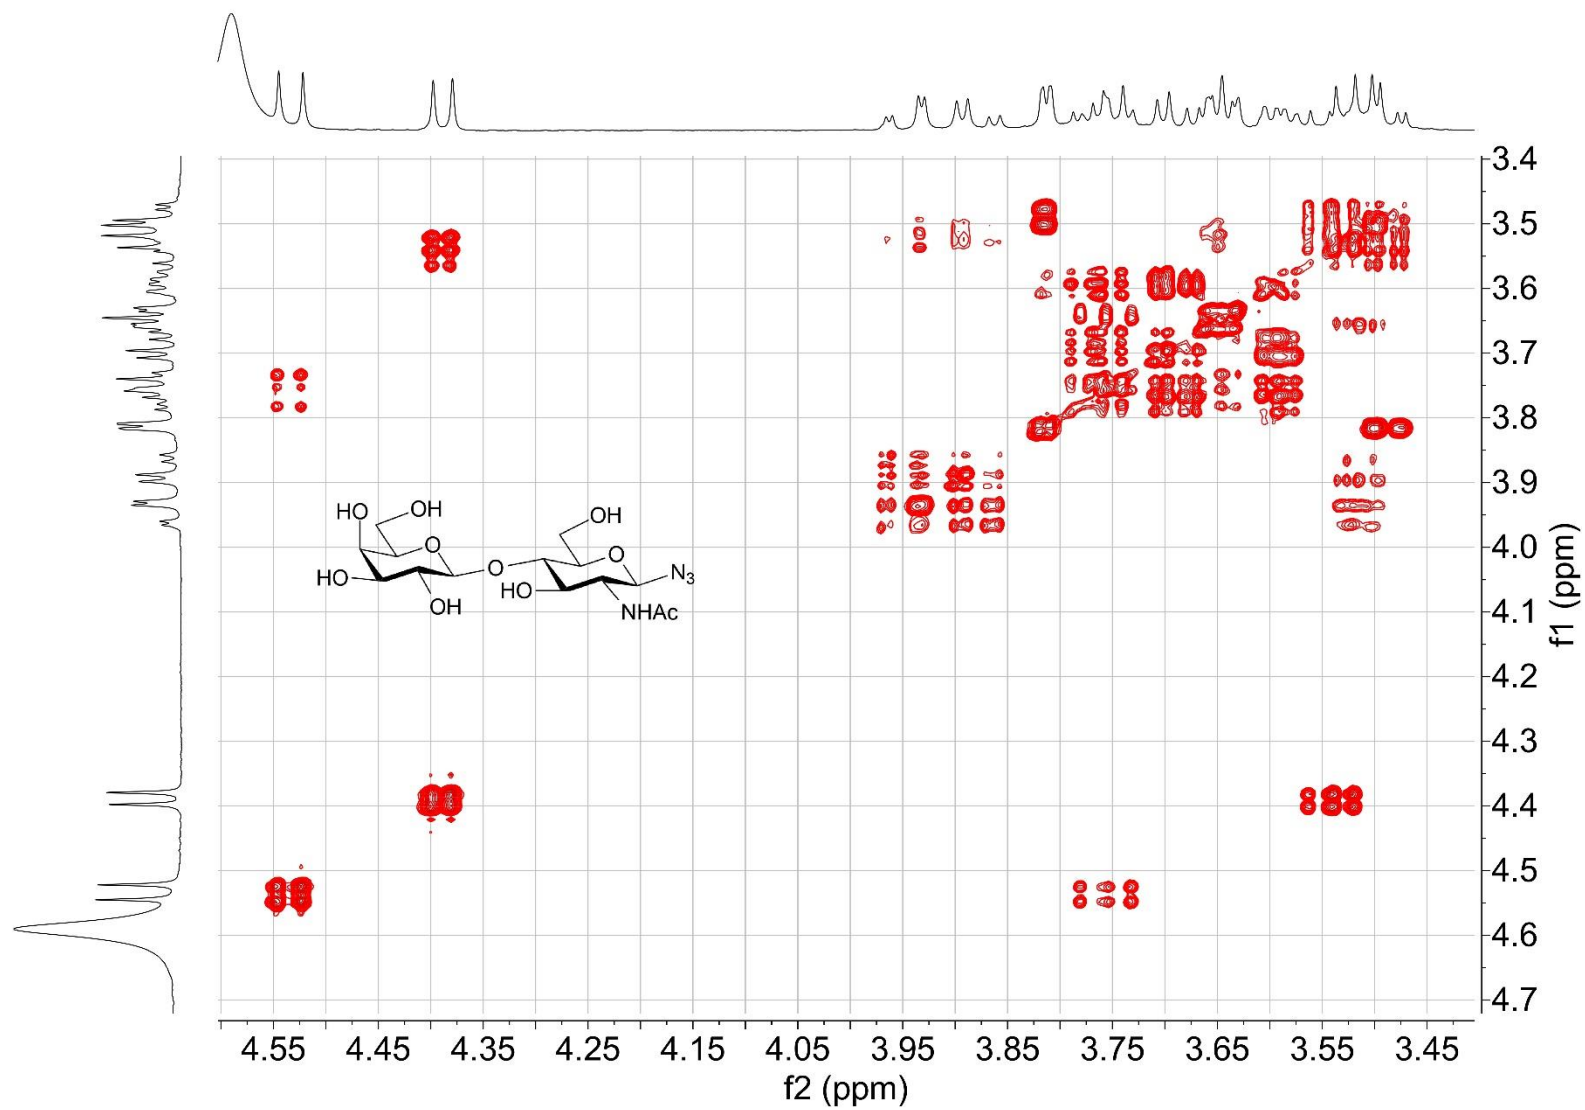

$^1\text{H}$ - $^{13}\text{C}$  HSQC 15

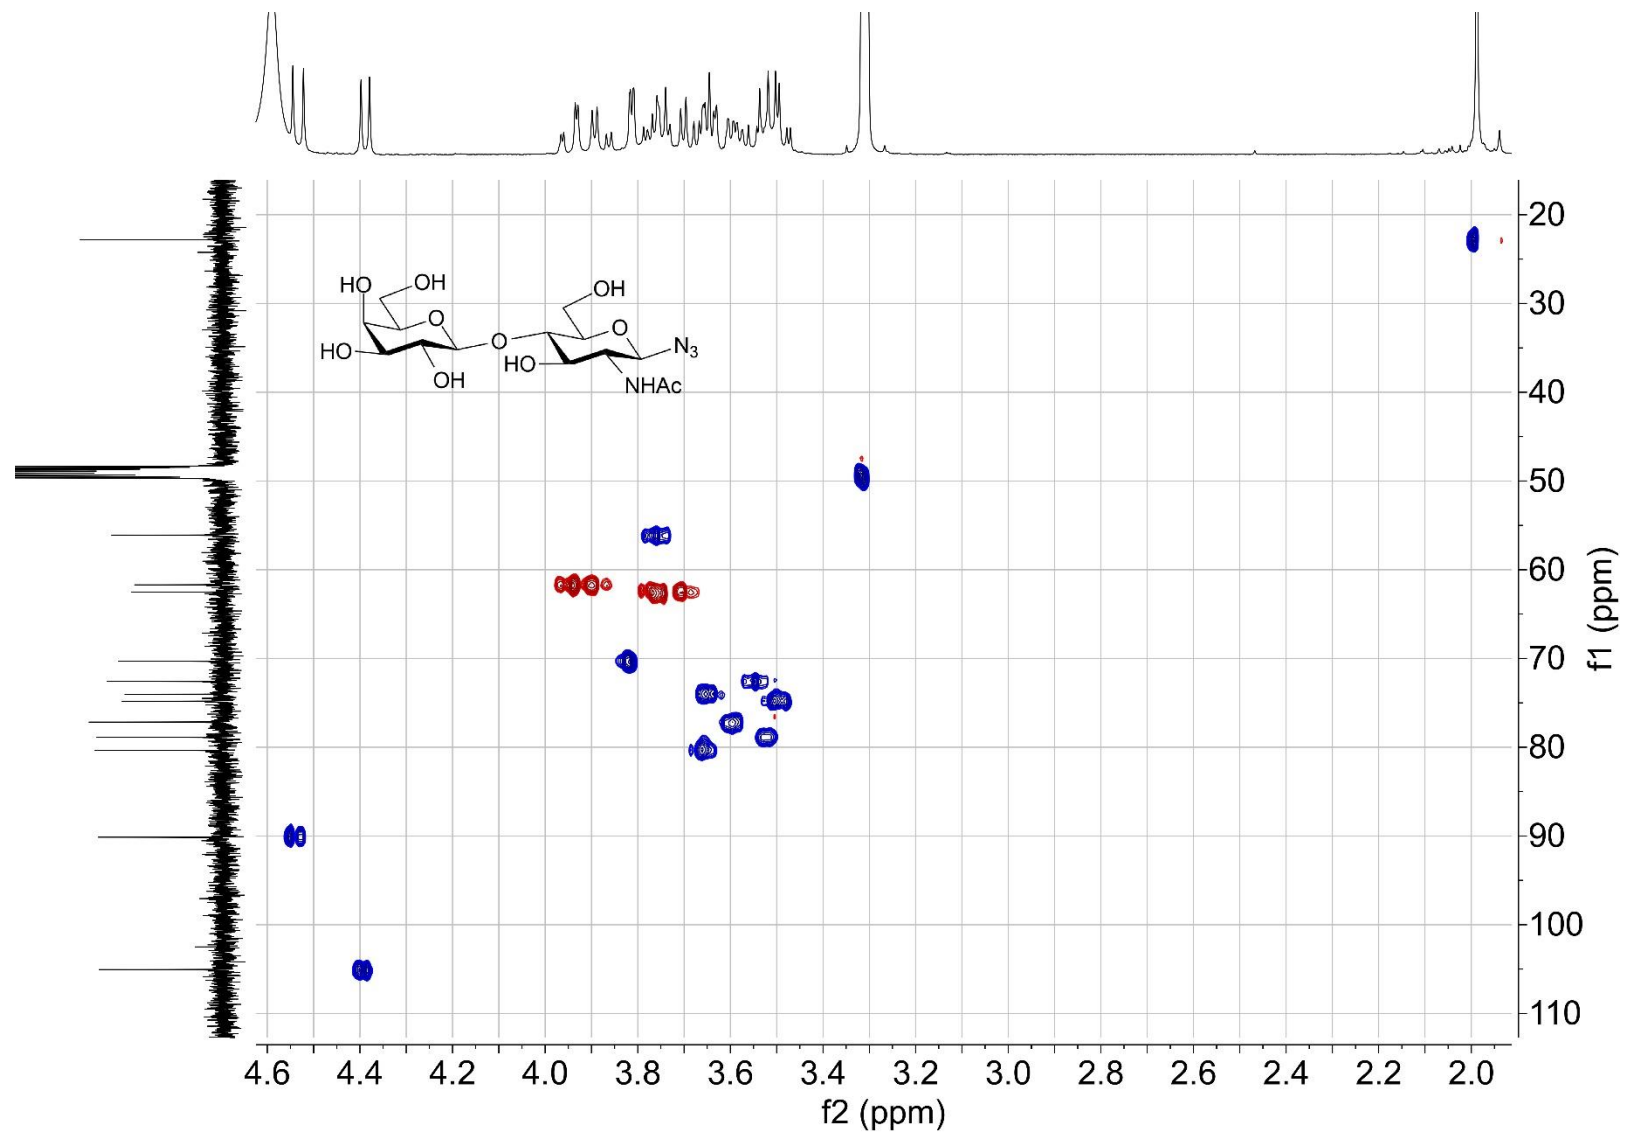

$^1\text{H}$ - $^{13}\text{C}$  HMBC 15

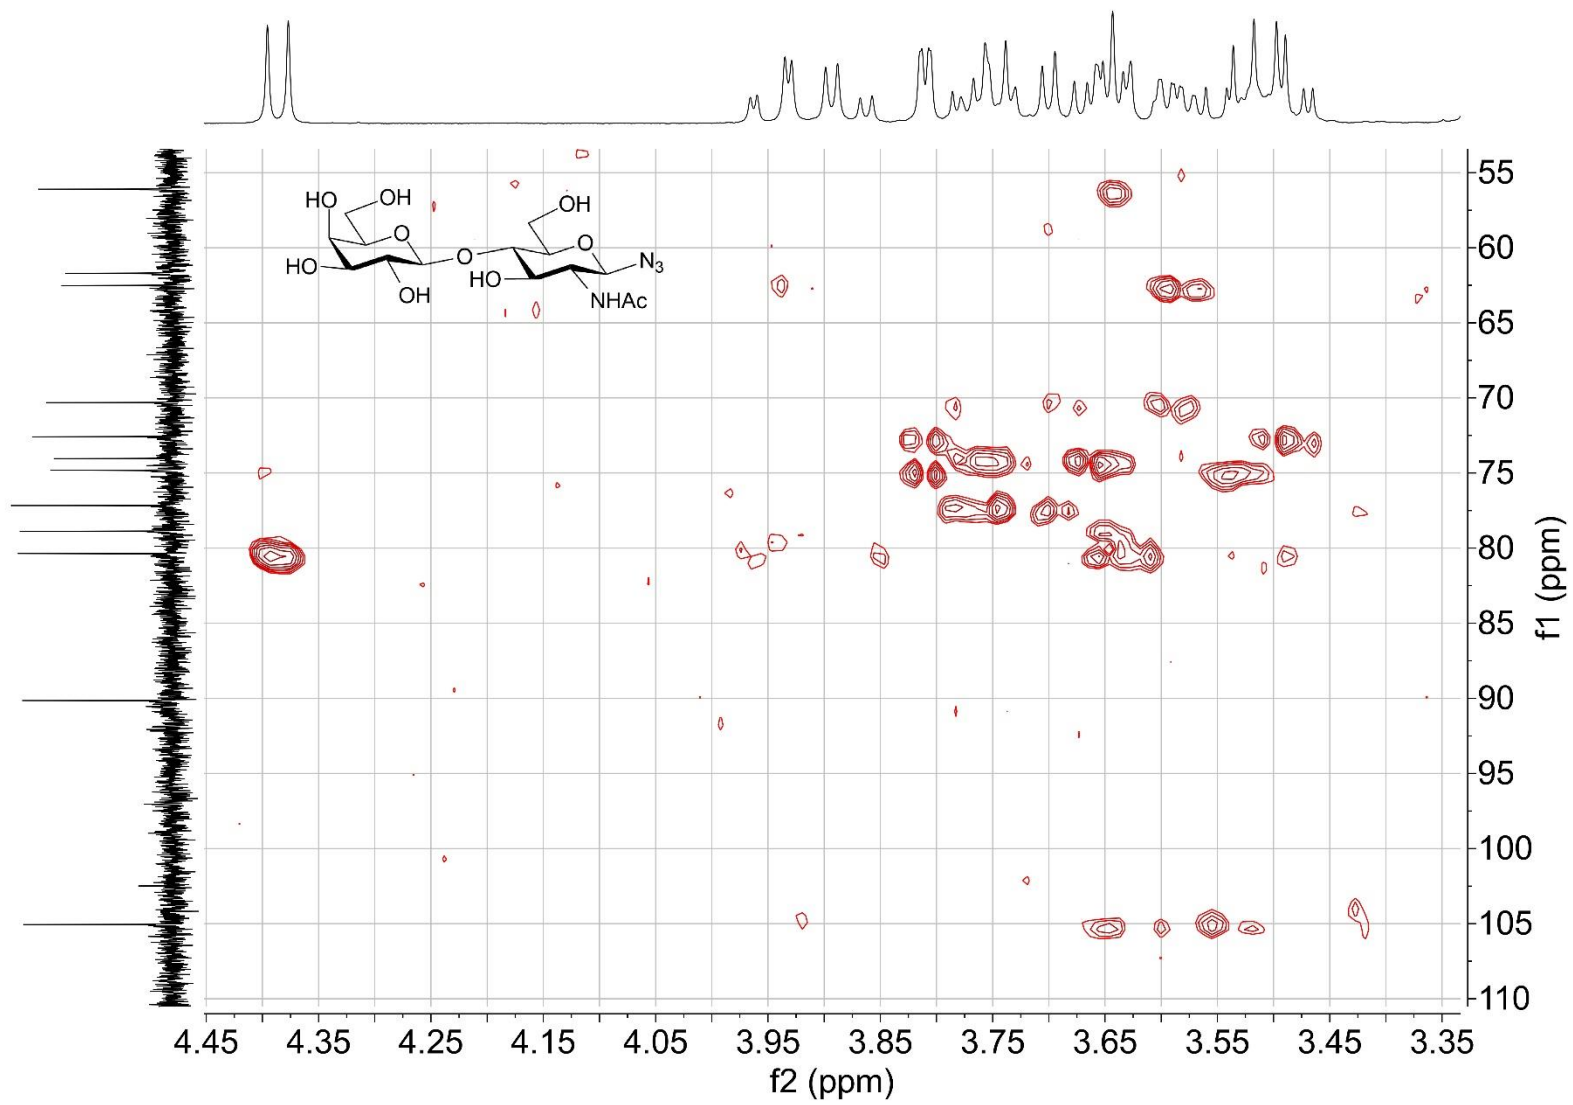

$^1\text{H}$ - $^{13}\text{C}$  HSQCTOCSY 15

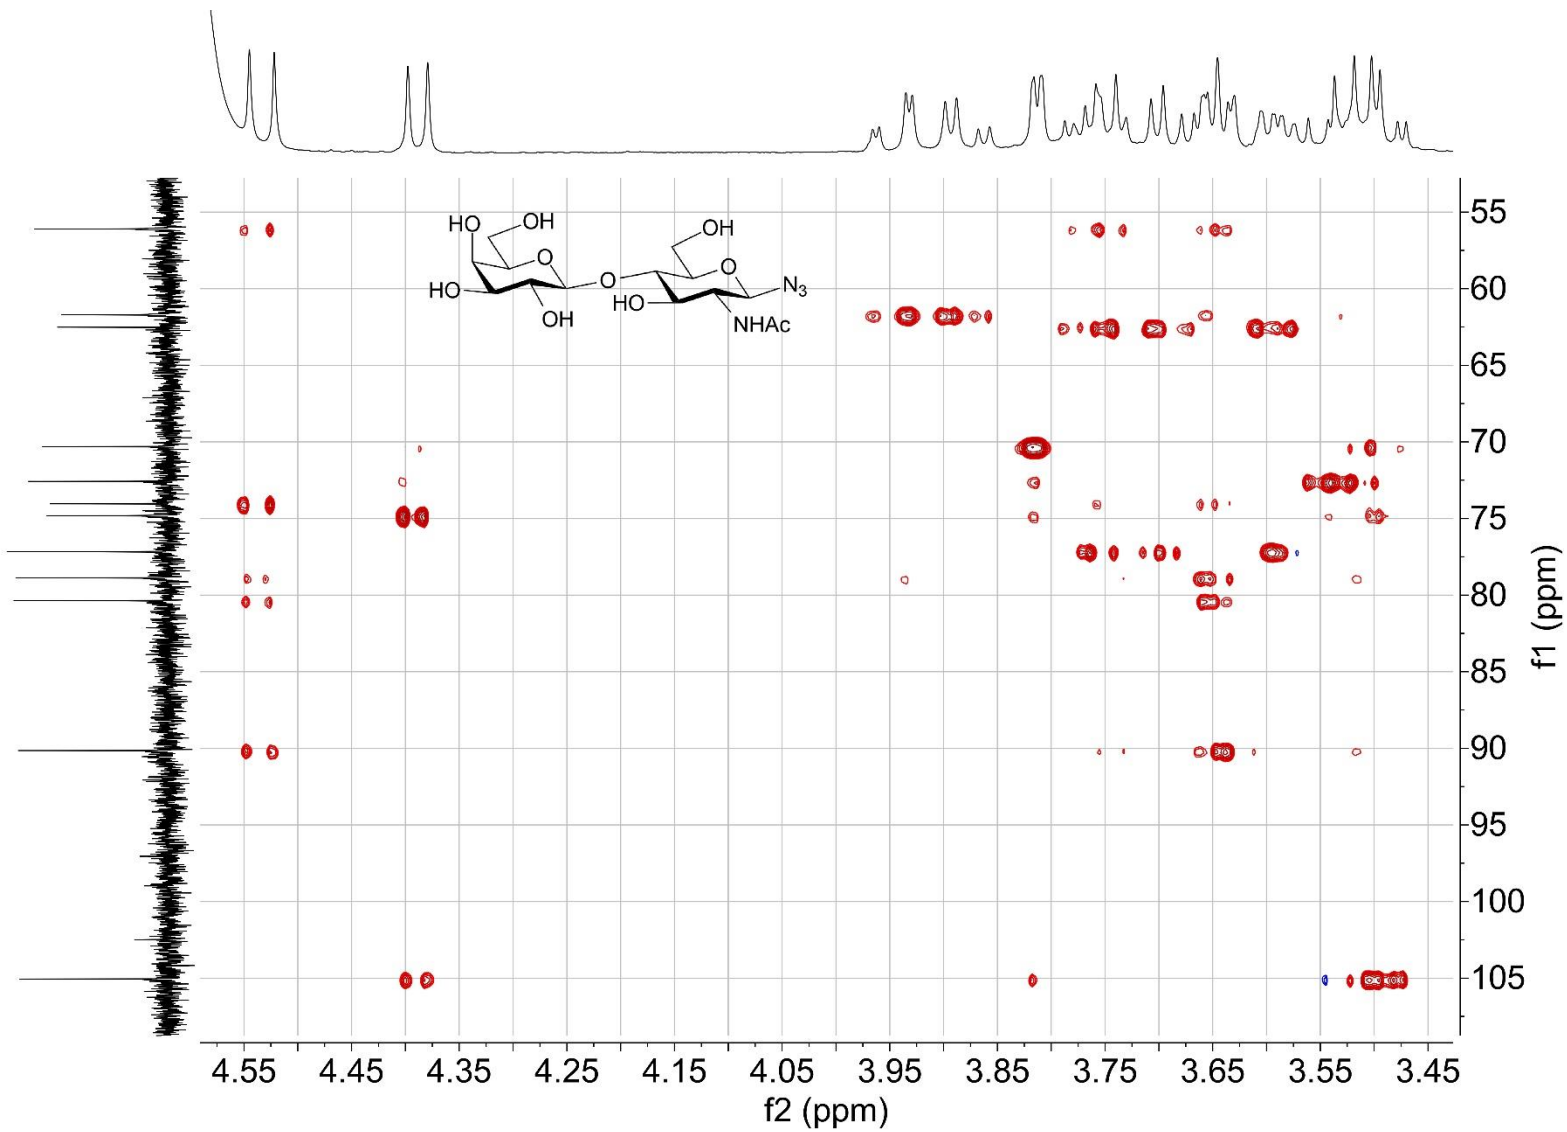



# NMR COMPOUND 16

## <sup>1</sup>H NMR (400 MHz, MeOD) 16

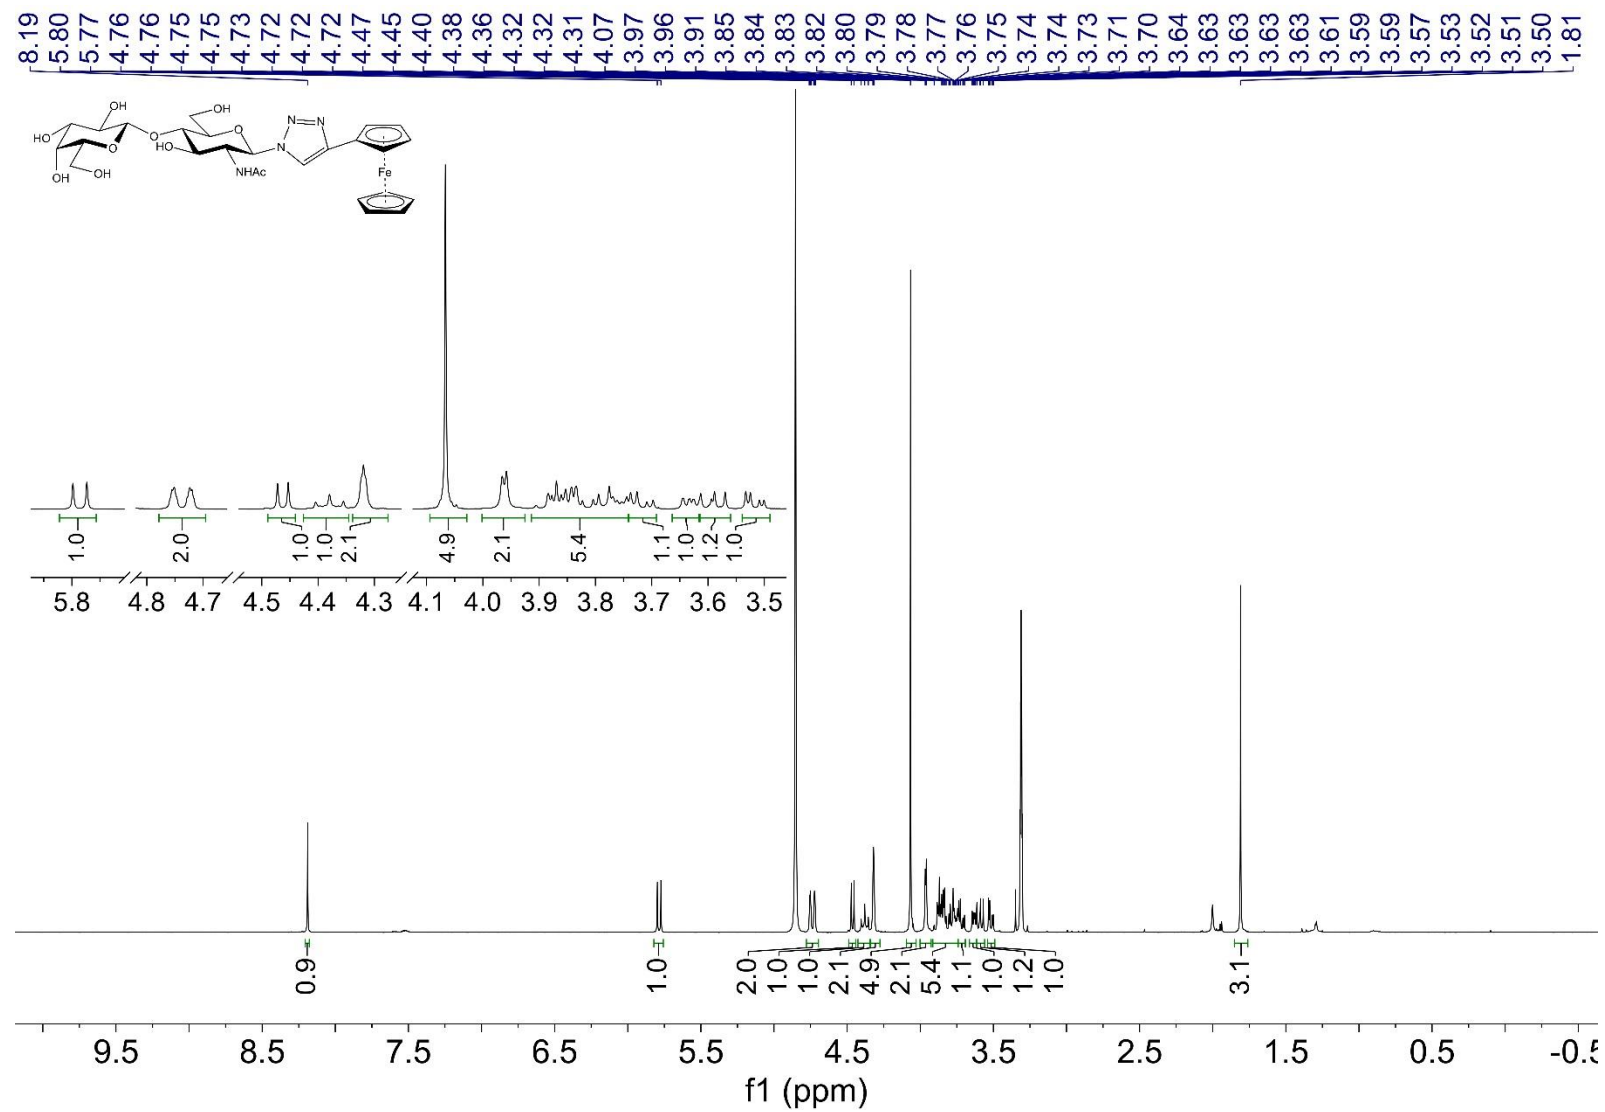

<sup>13</sup>C NMR (101 MHz, MeOD) 16

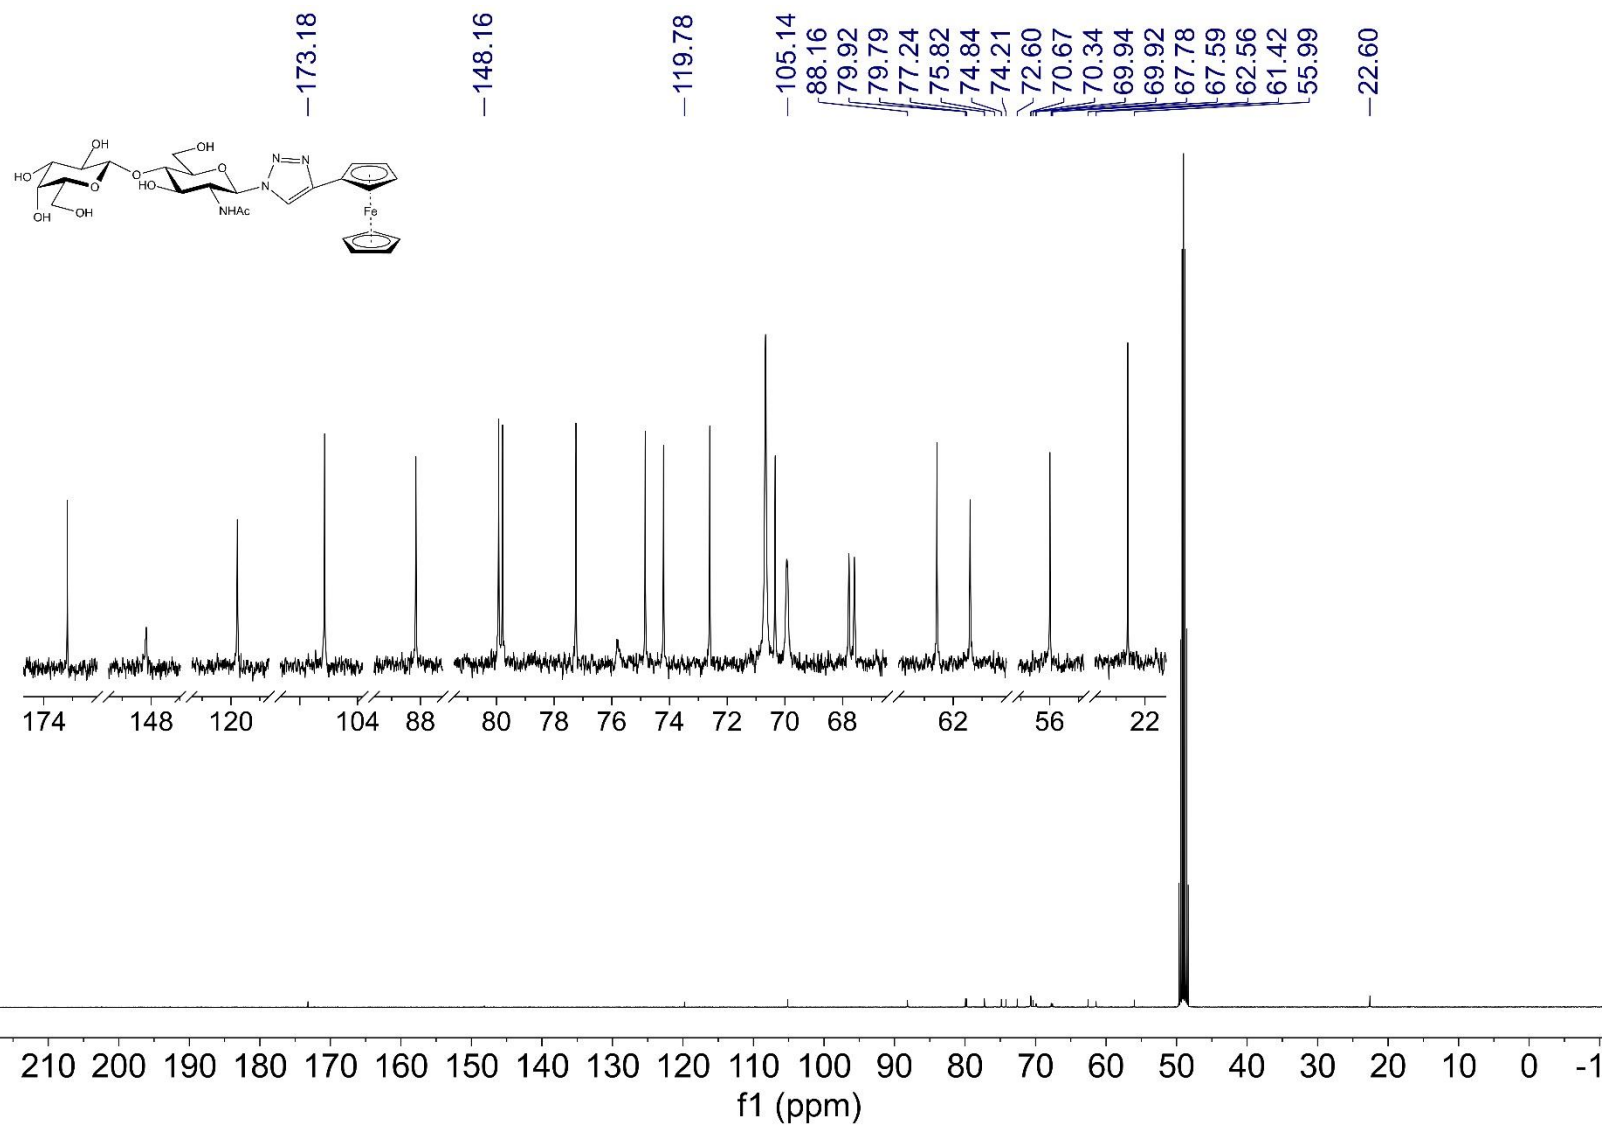

<sup>1</sup>H-<sup>1</sup>H COSY 16

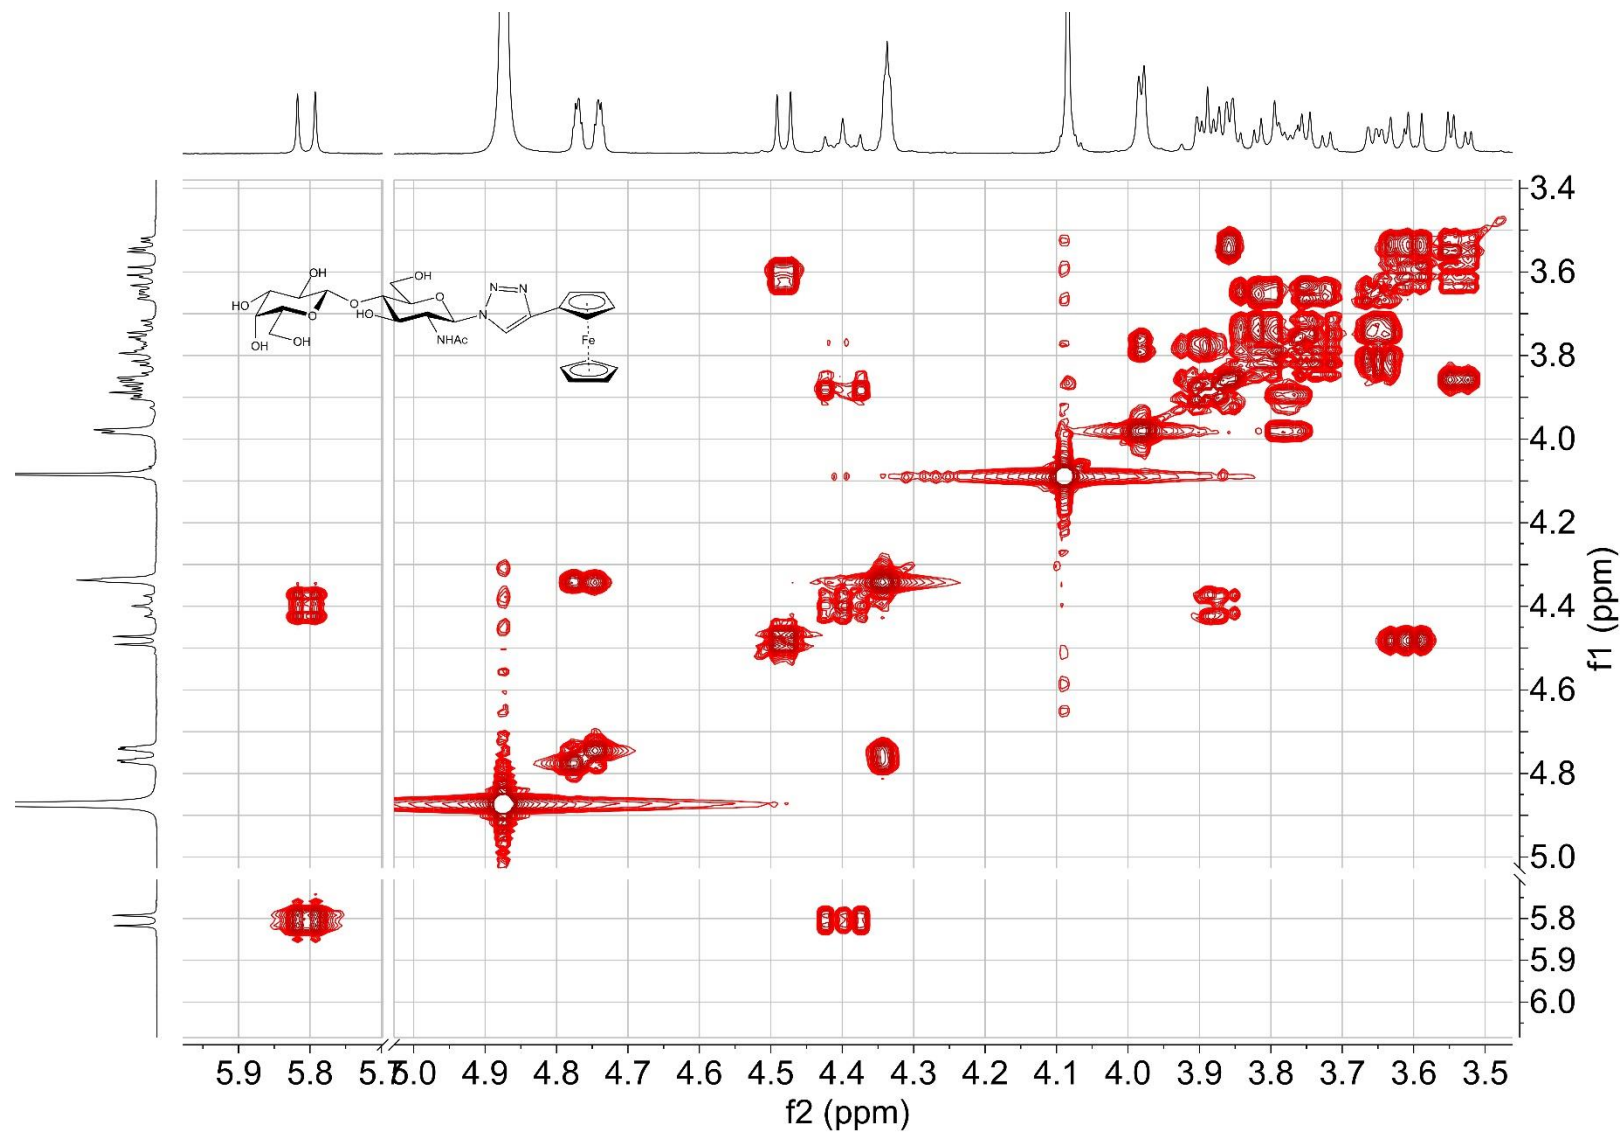

$^1\text{H}$ - $^{13}\text{C}$  HSQC 16

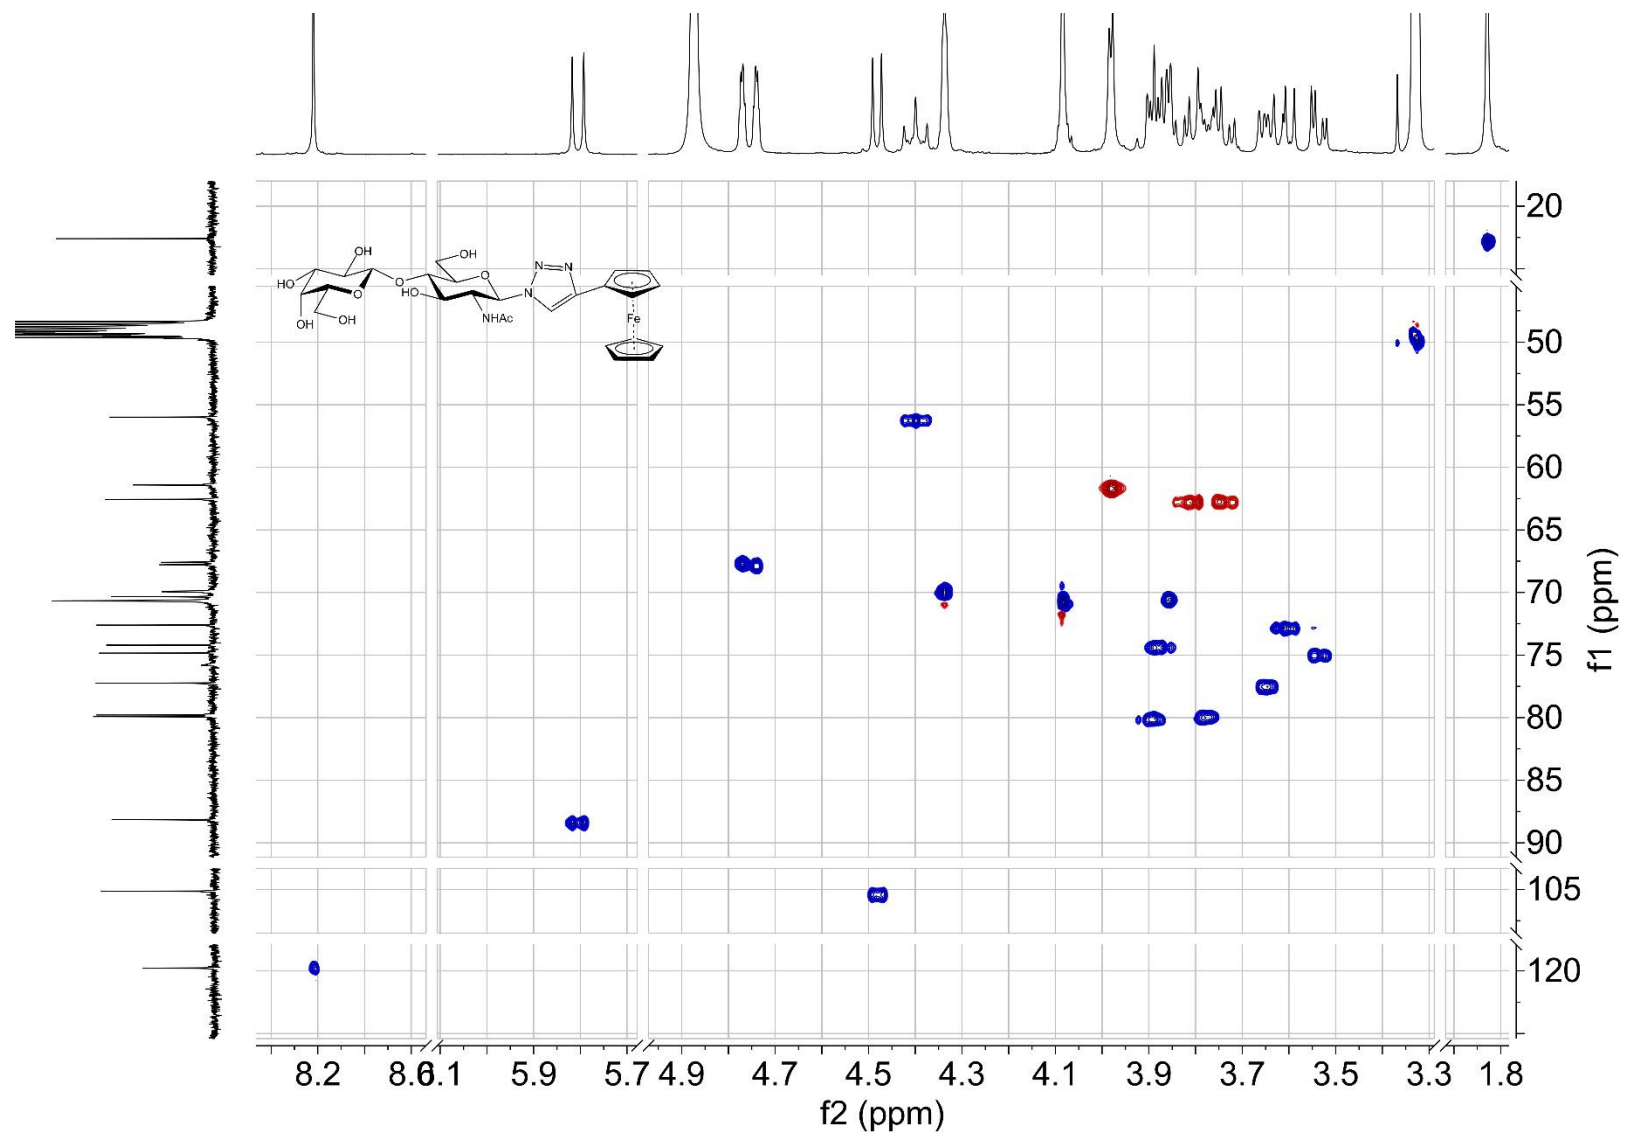

$^1\text{H}$ - $^{13}\text{C}$  HMBC 16

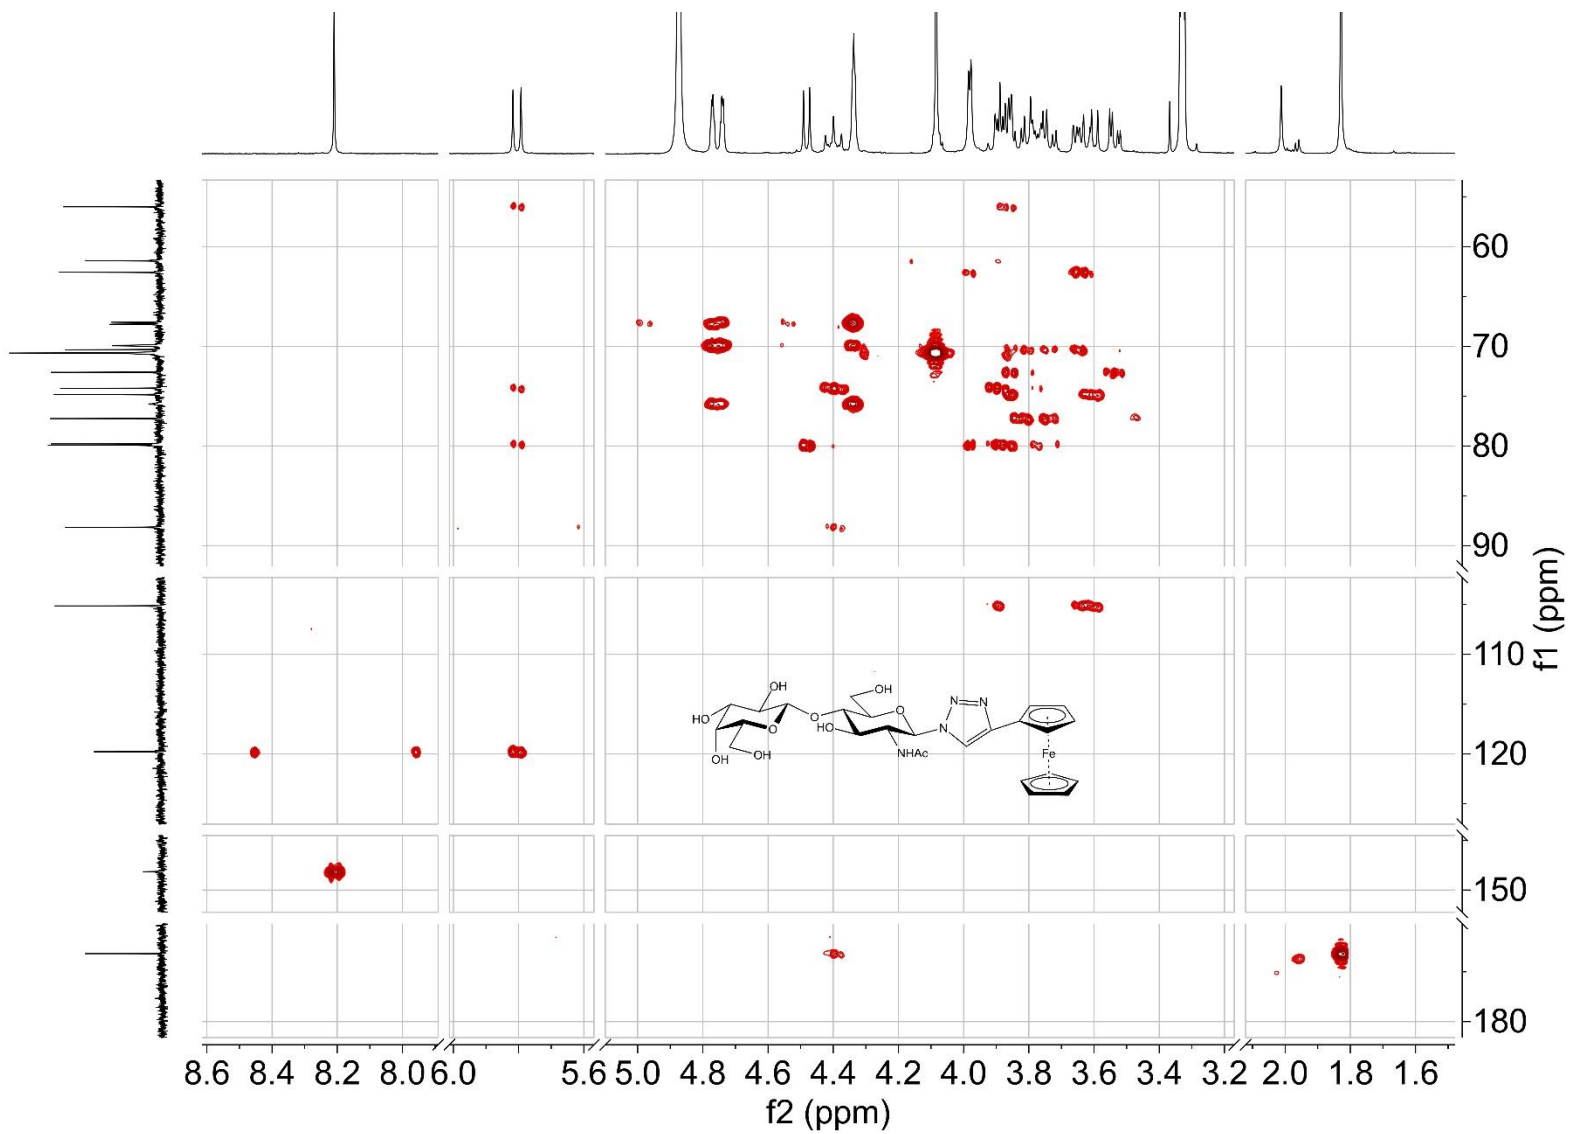

$^1\text{H}$ - $^{13}\text{C}$  HSQCTOCSY 16

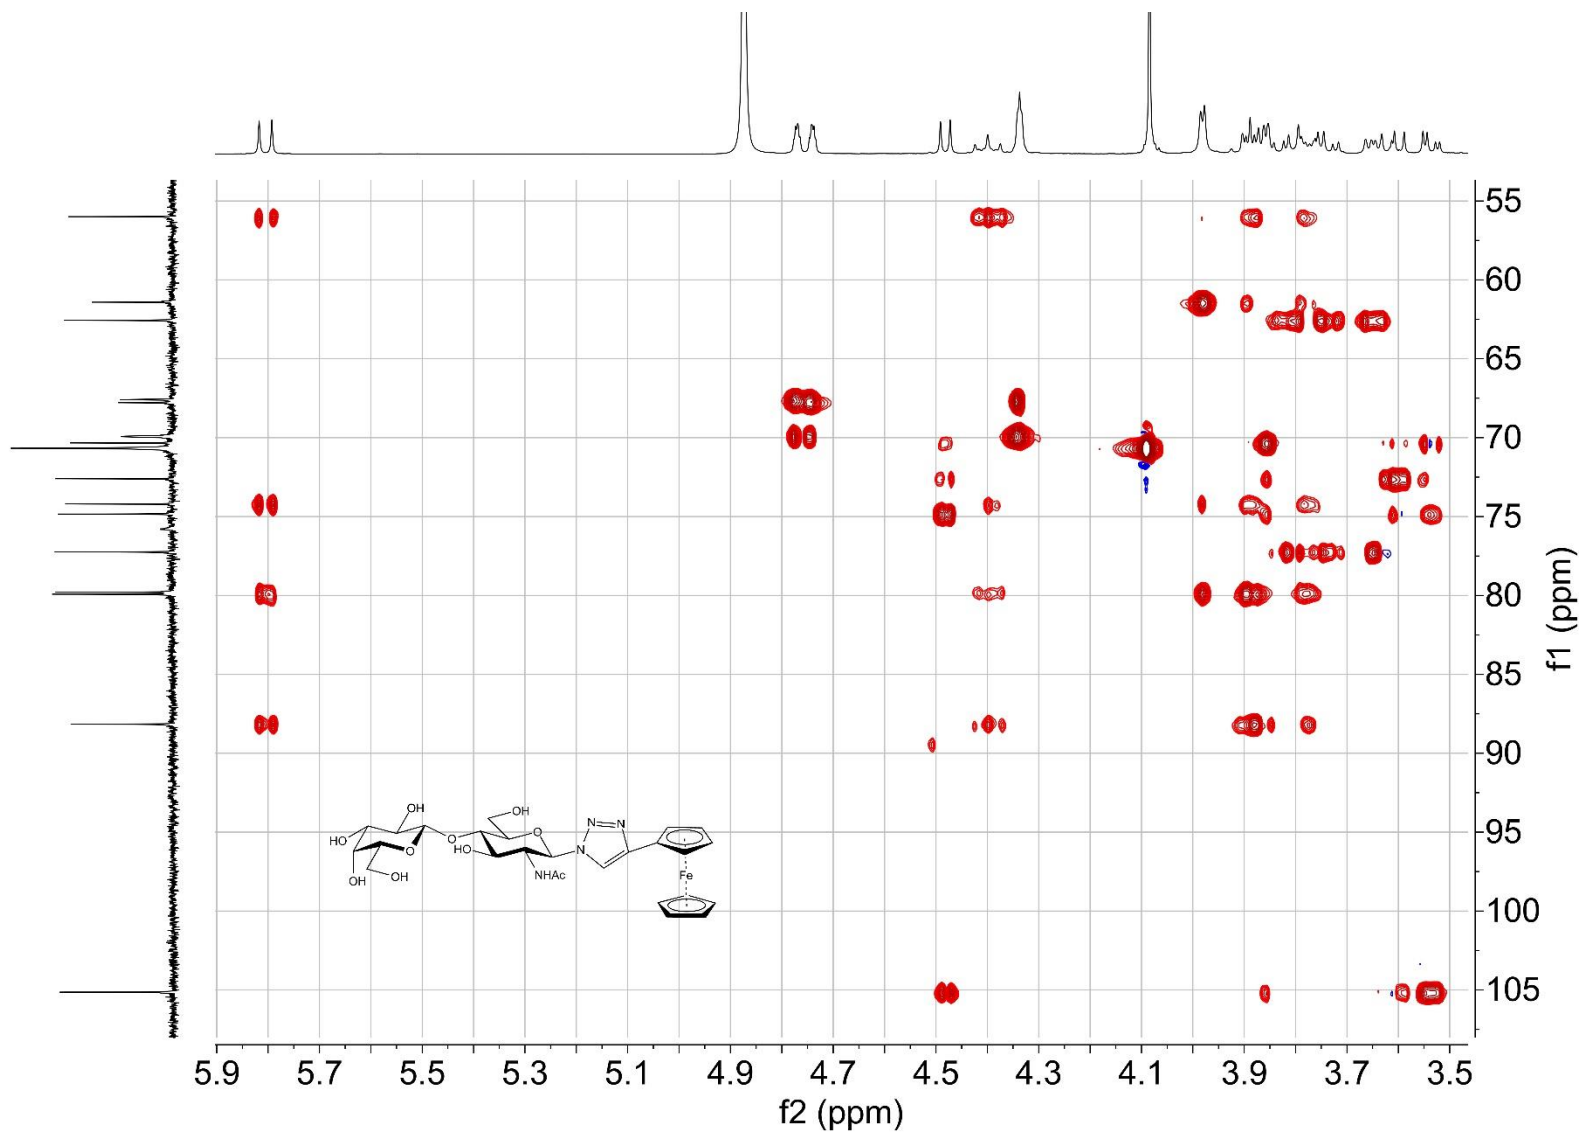

# NMR COMPOUND 18

## <sup>1</sup>H NMR (400 MHz, CDCl<sub>3</sub>) 18

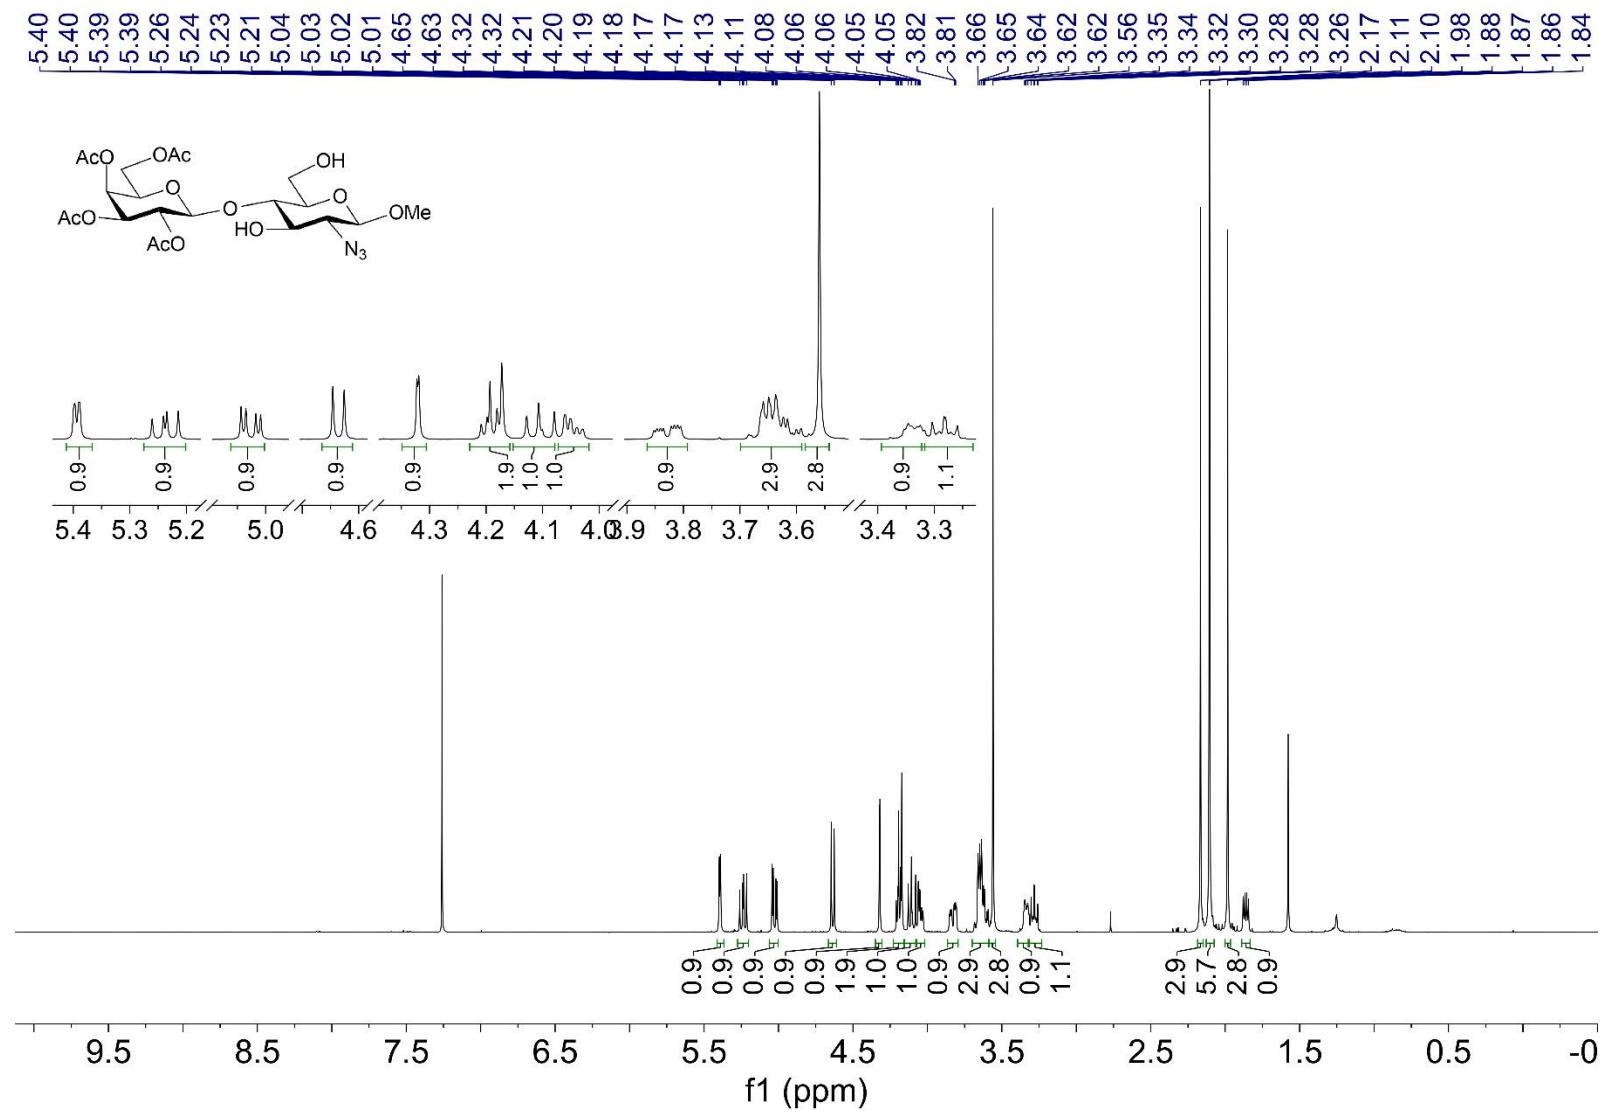

<sup>13</sup>C NMR (101 MHz, CDCl<sub>3</sub>) 18

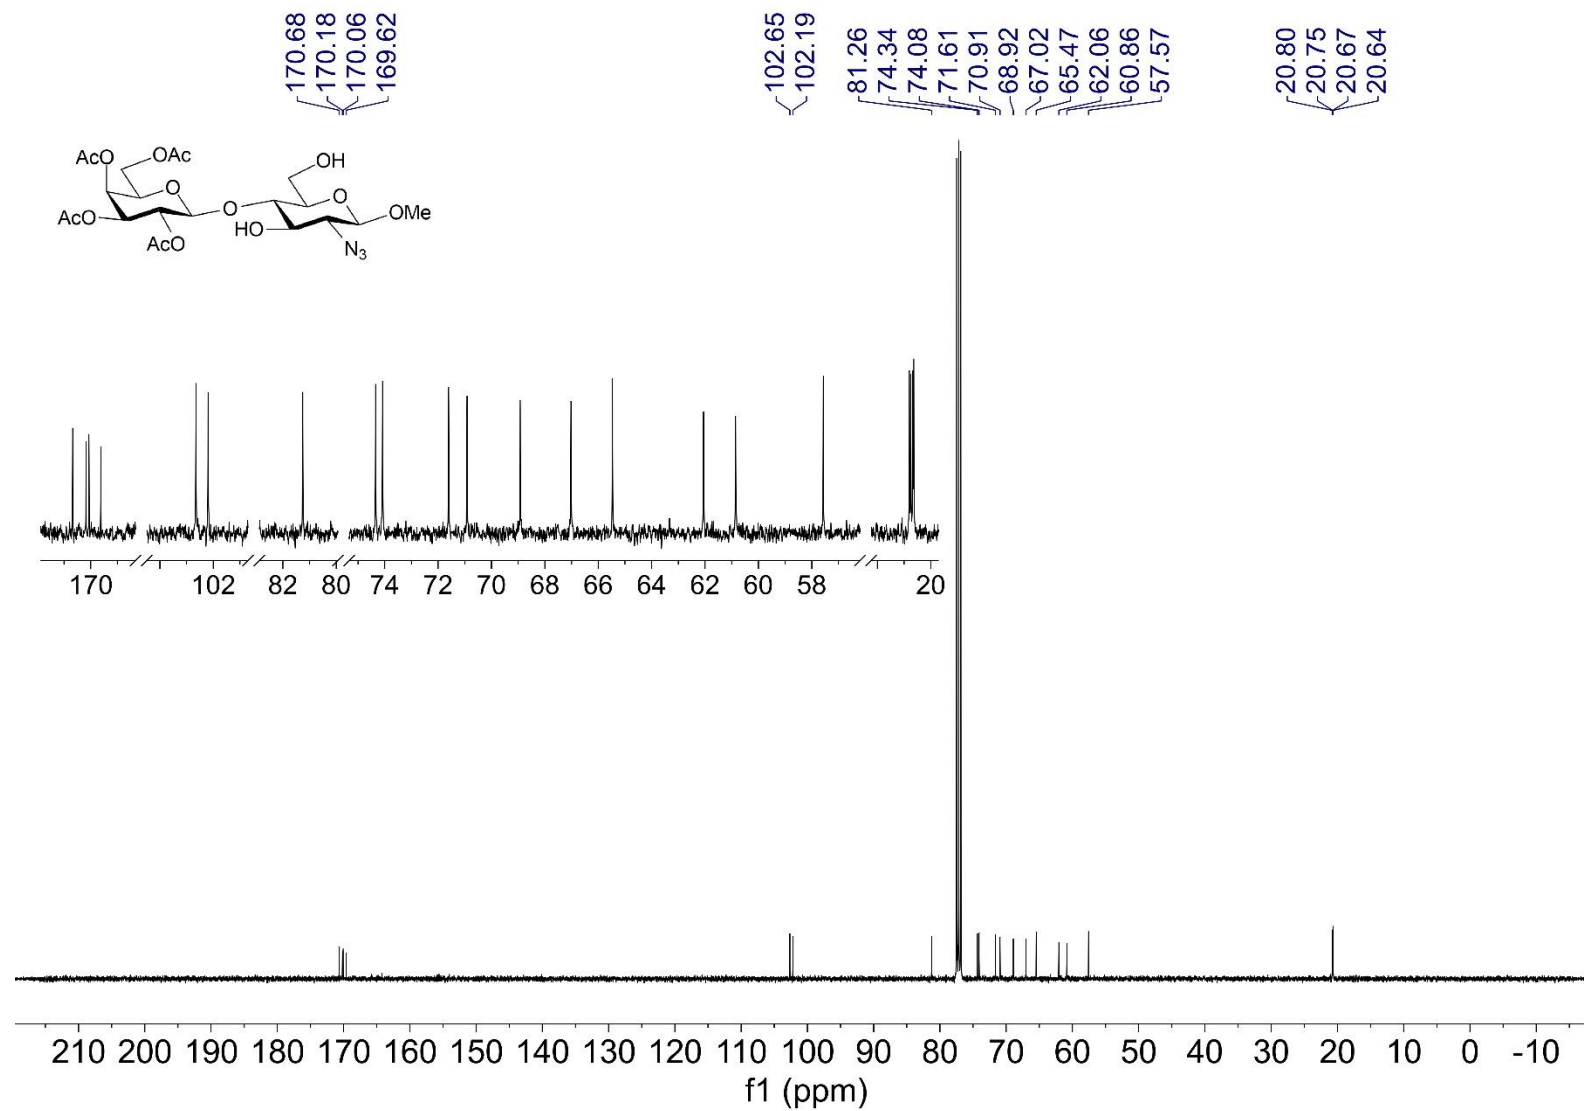



# NMR COMPOUND 19

## <sup>1</sup>H NMR (400 MHz, MeOD) 19

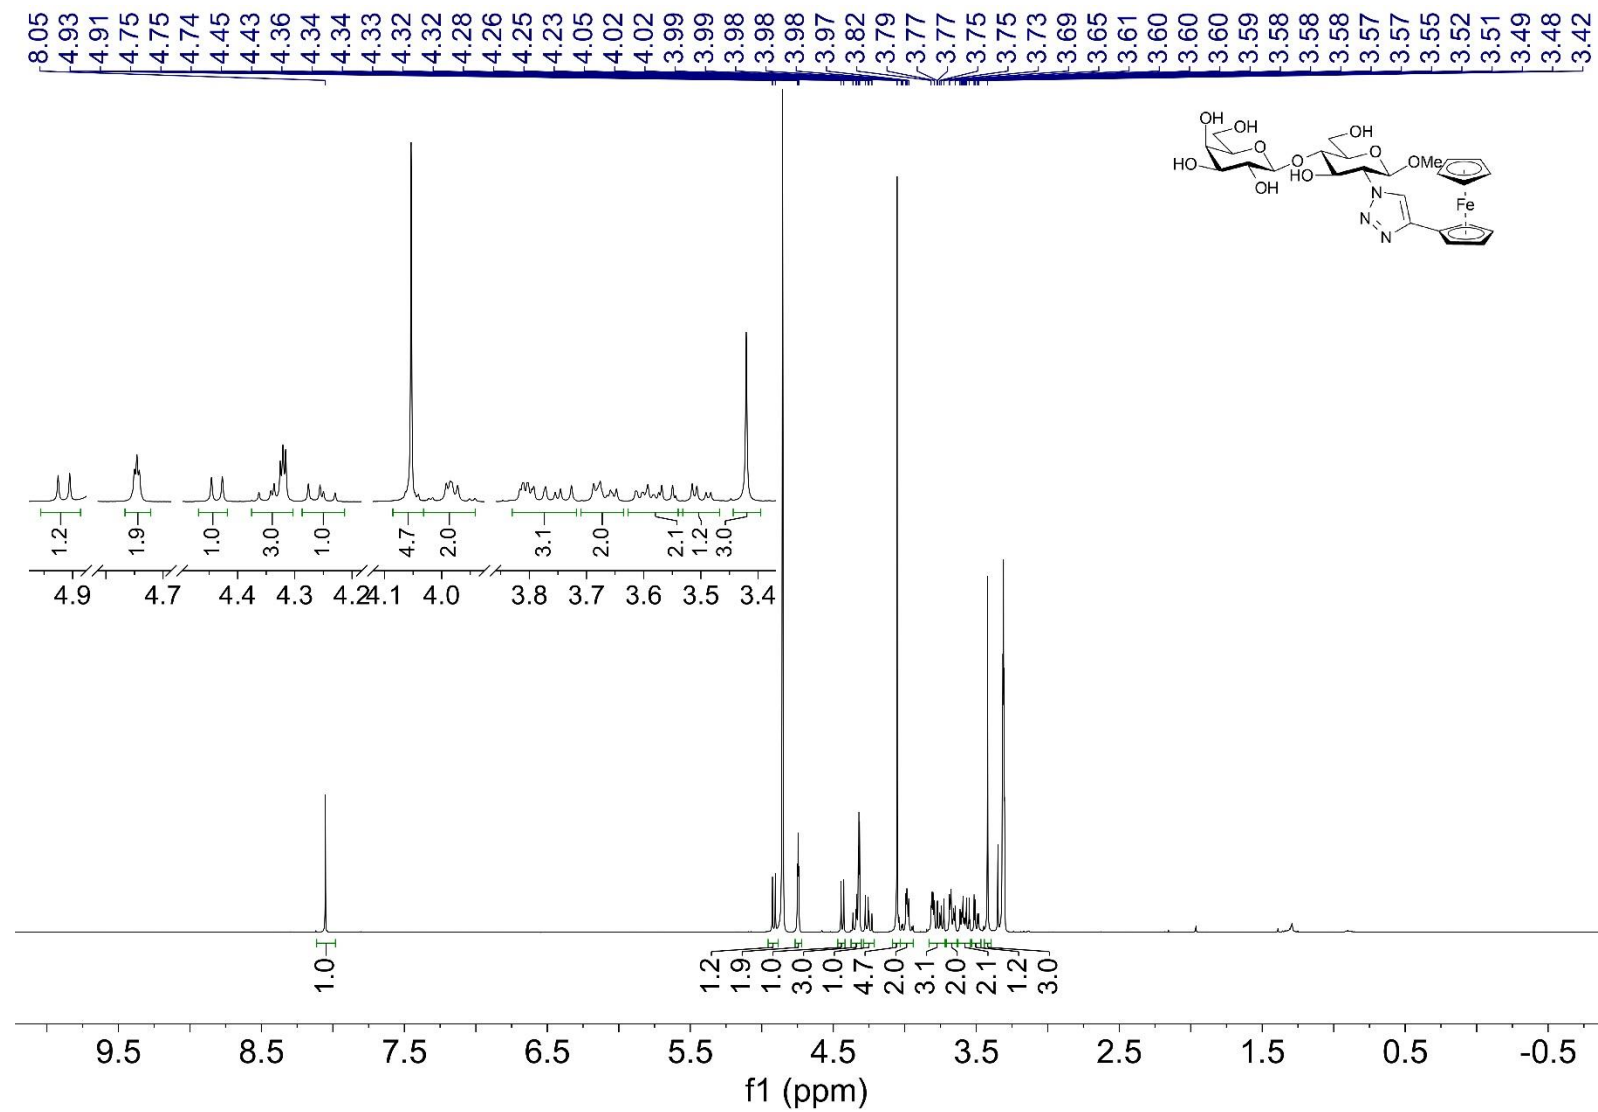

**<sup>13</sup>C NMR (101 MHz, MeOD) 19**

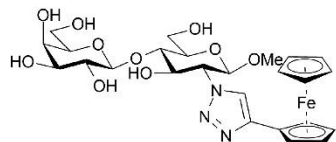

— 147.36

— 122.79

~ 105.29

~ 102.82

81.00

77.14

76.74

76.04

74.85

74.00

72.64

70.59

70.30

69.79

67.64

62.50

61.69

57.43

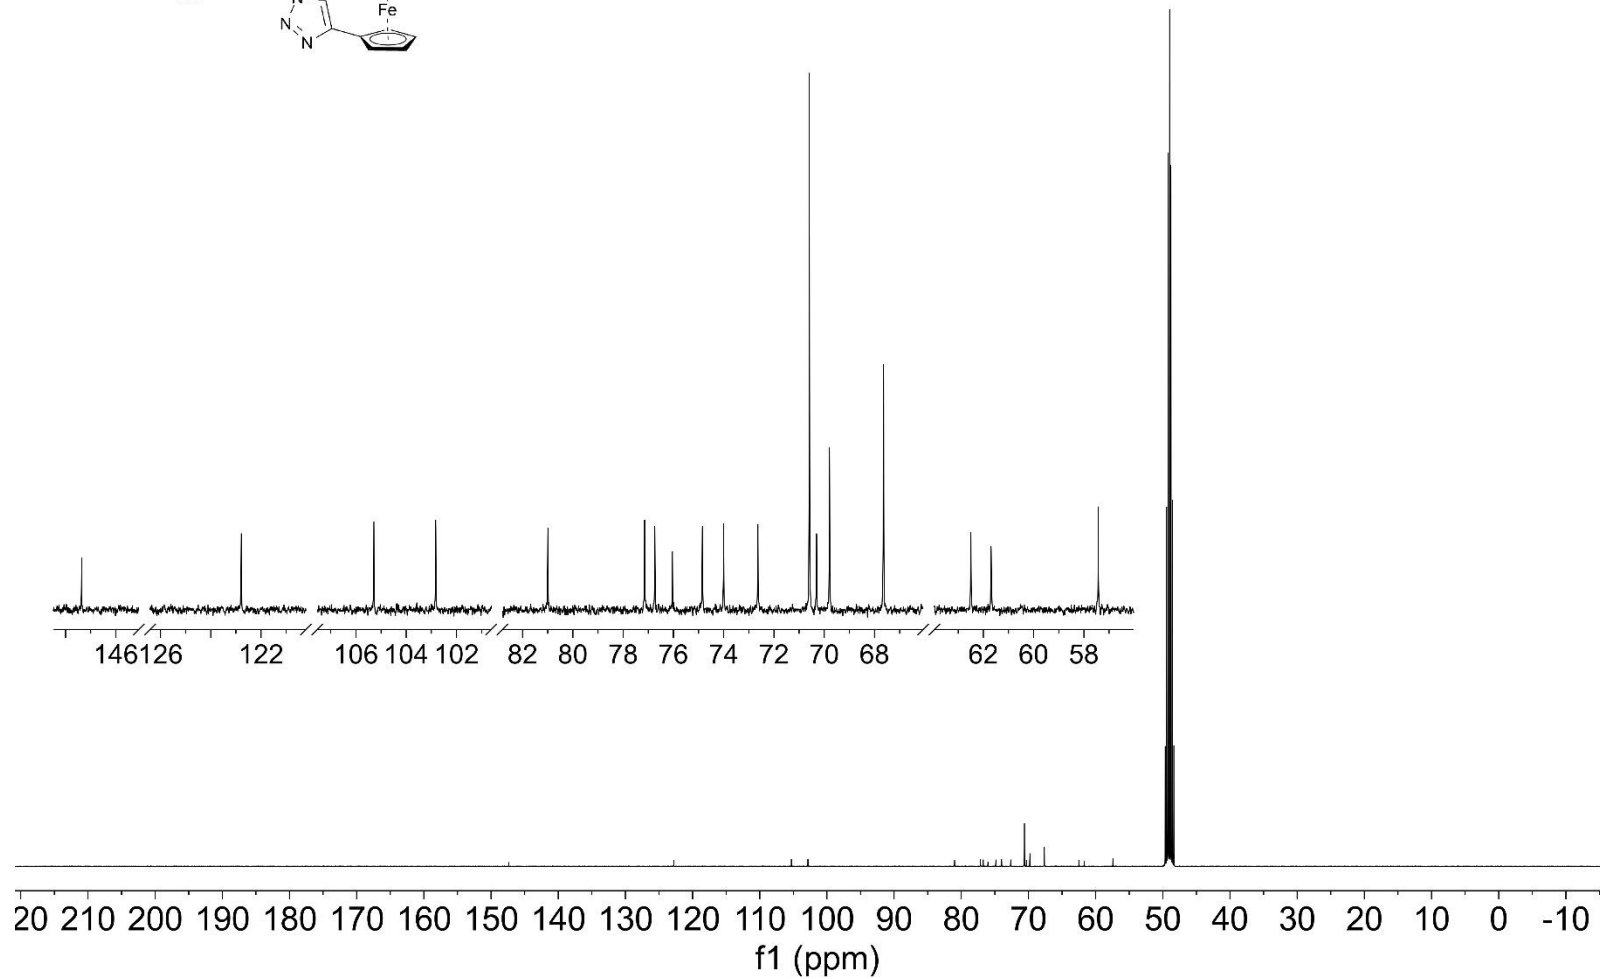

**<sup>1</sup>H-<sup>1</sup>H COSY 19**

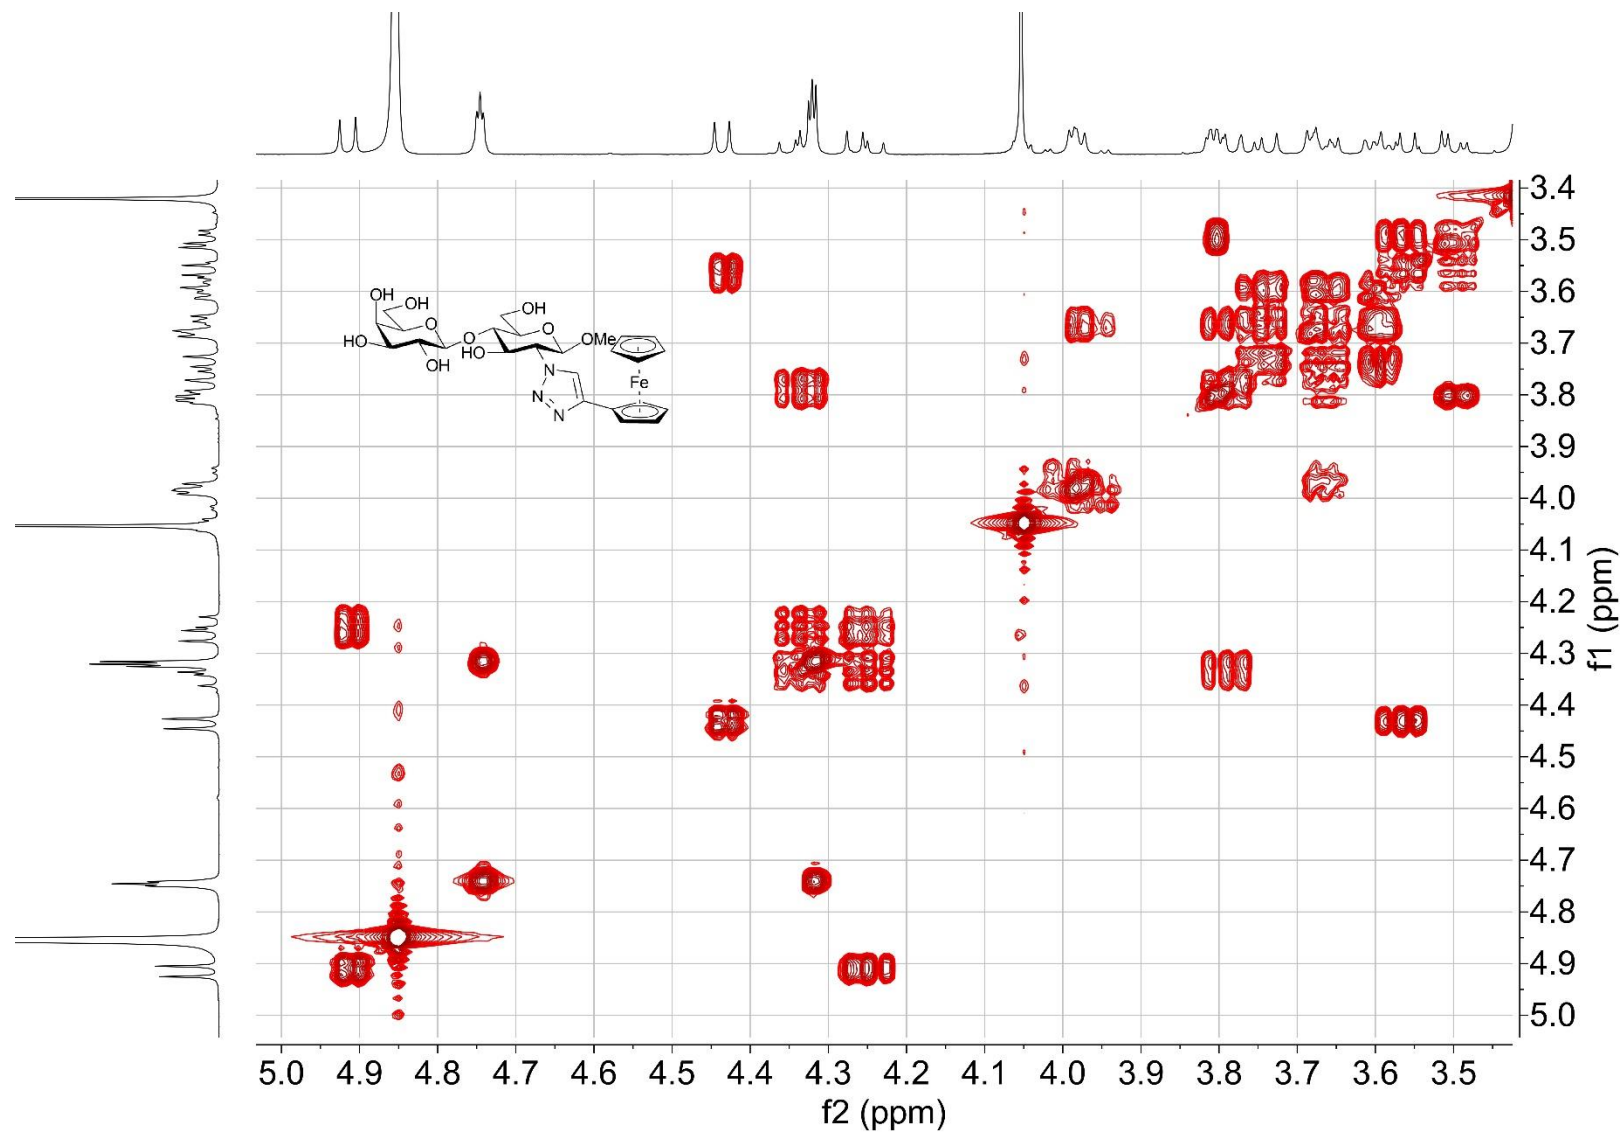

$^1\text{H}$ - $^{13}\text{C}$  HSQC 19

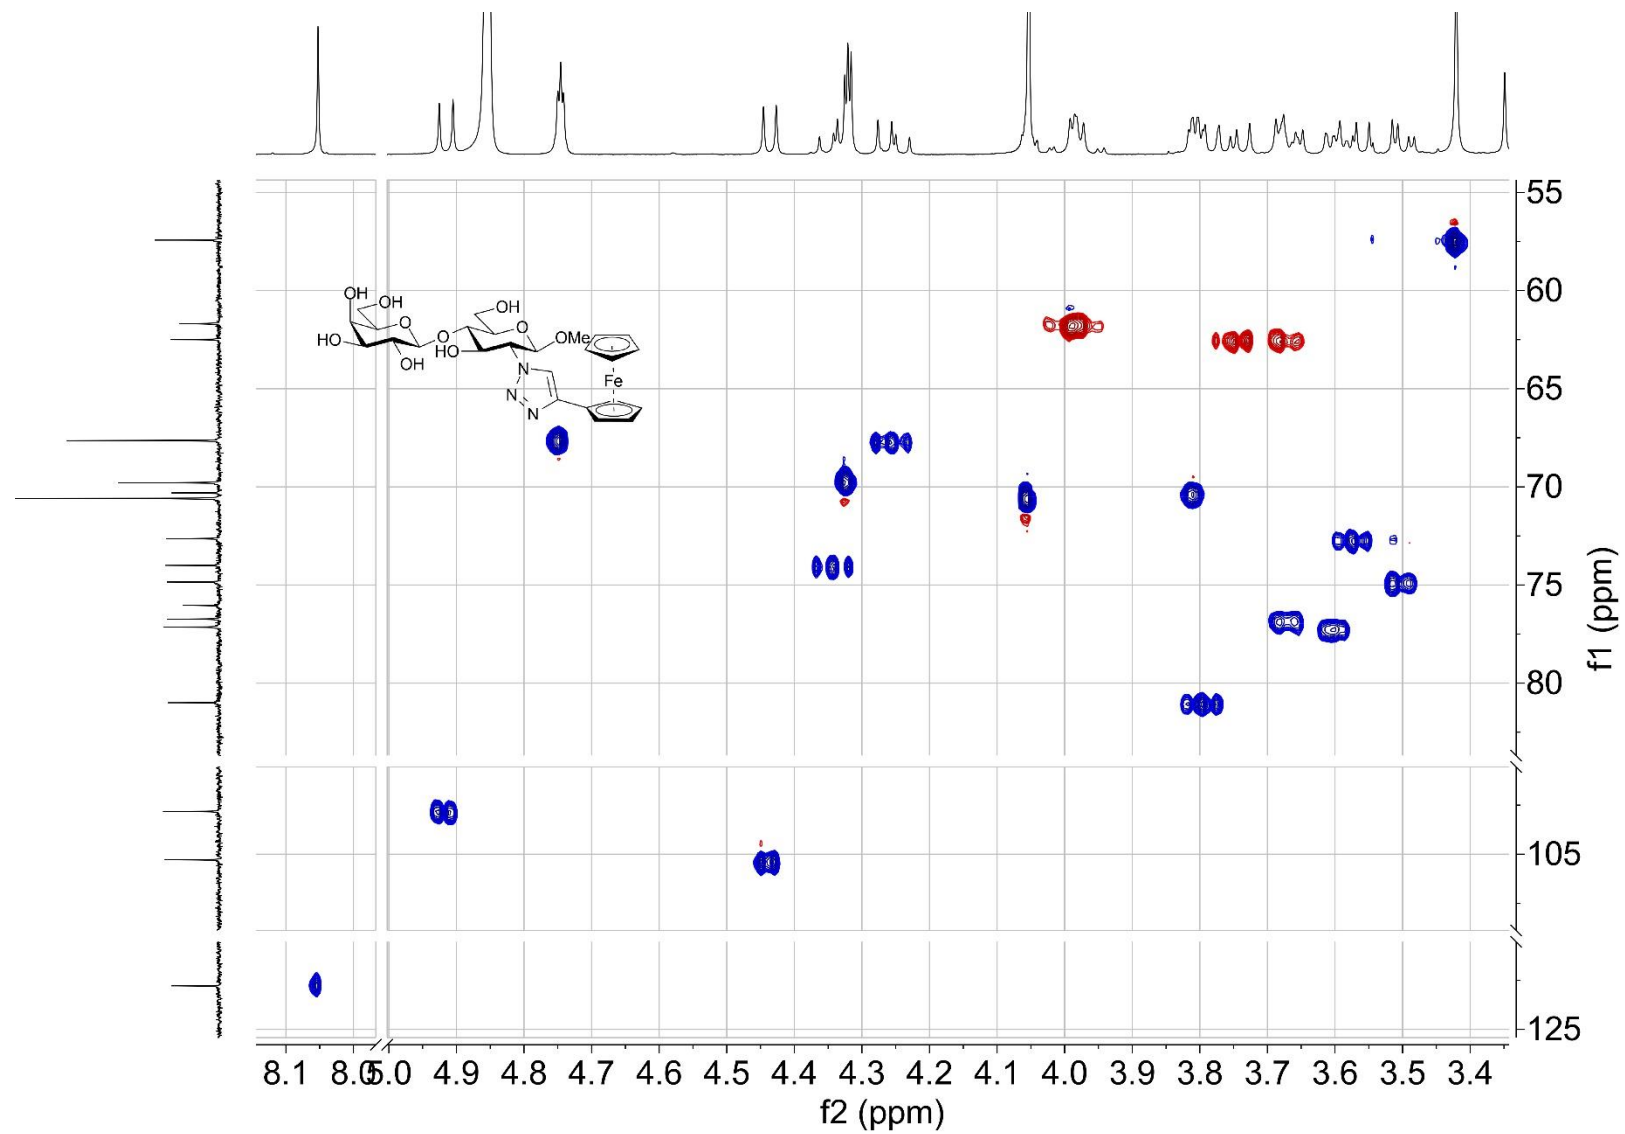

<sup>1</sup>H-<sup>13</sup>C HMBC 19

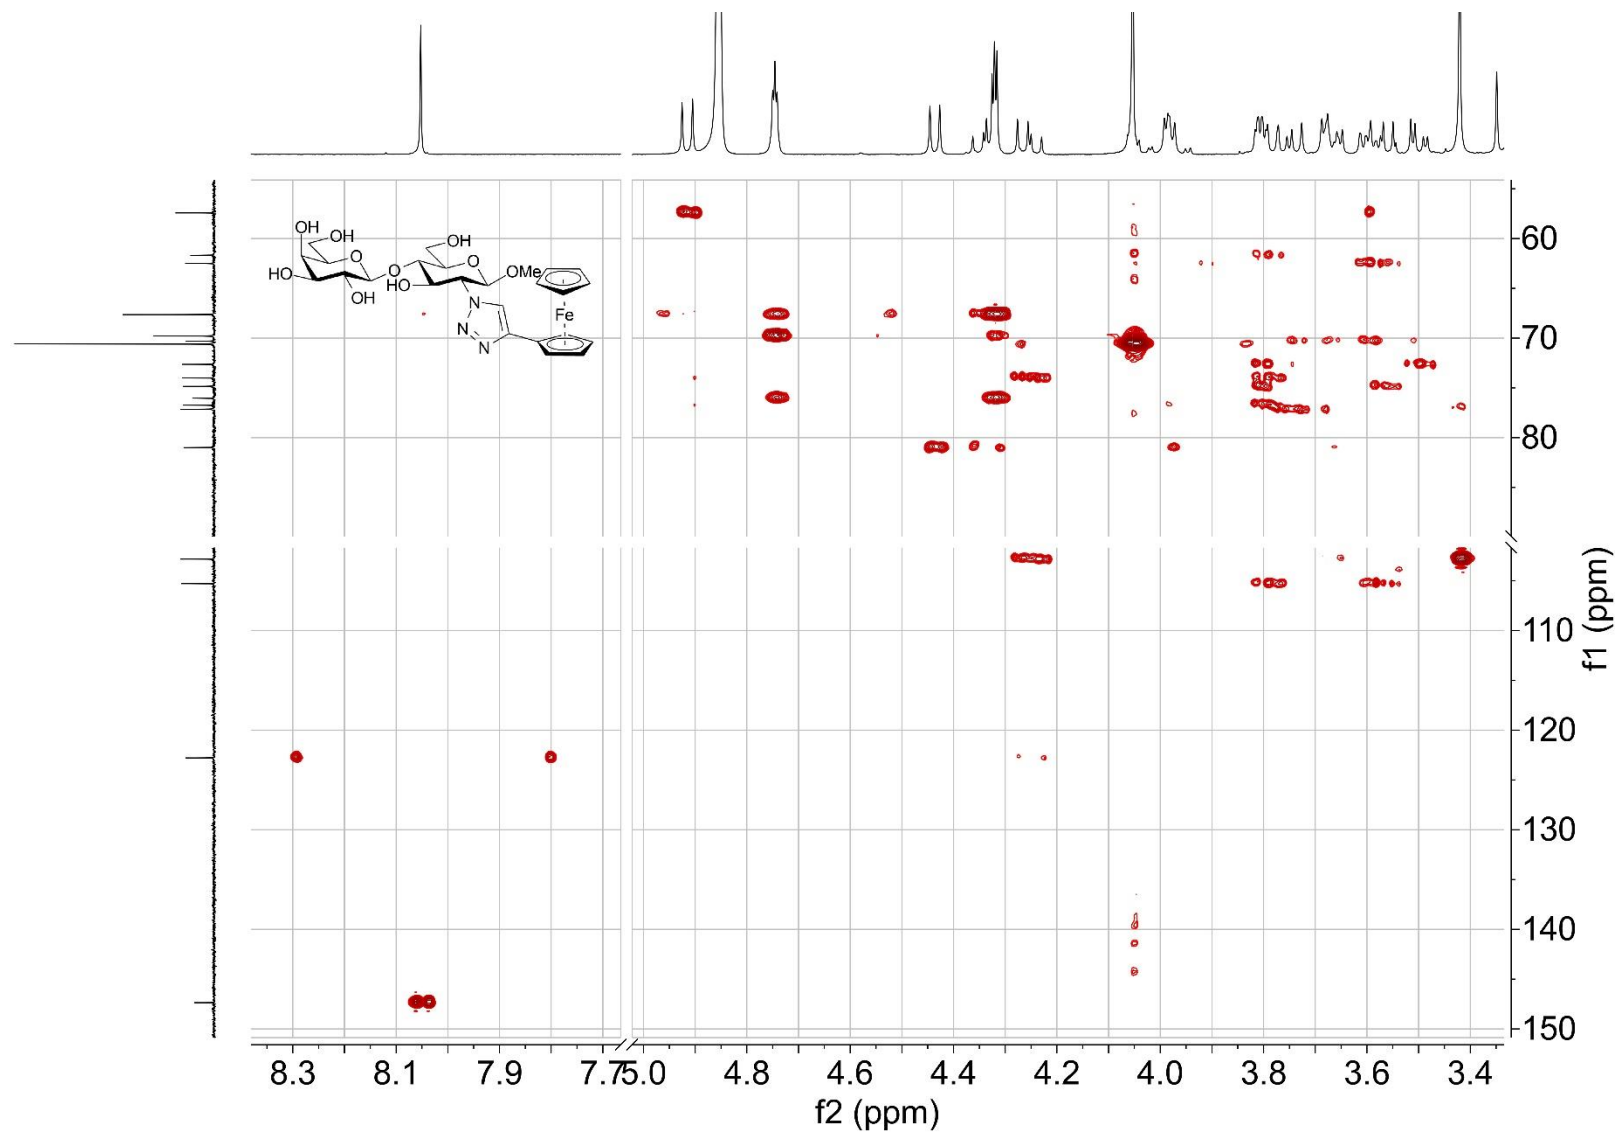

$^1\text{H}$ - $^{13}\text{C}$  HSQTOCSY 19

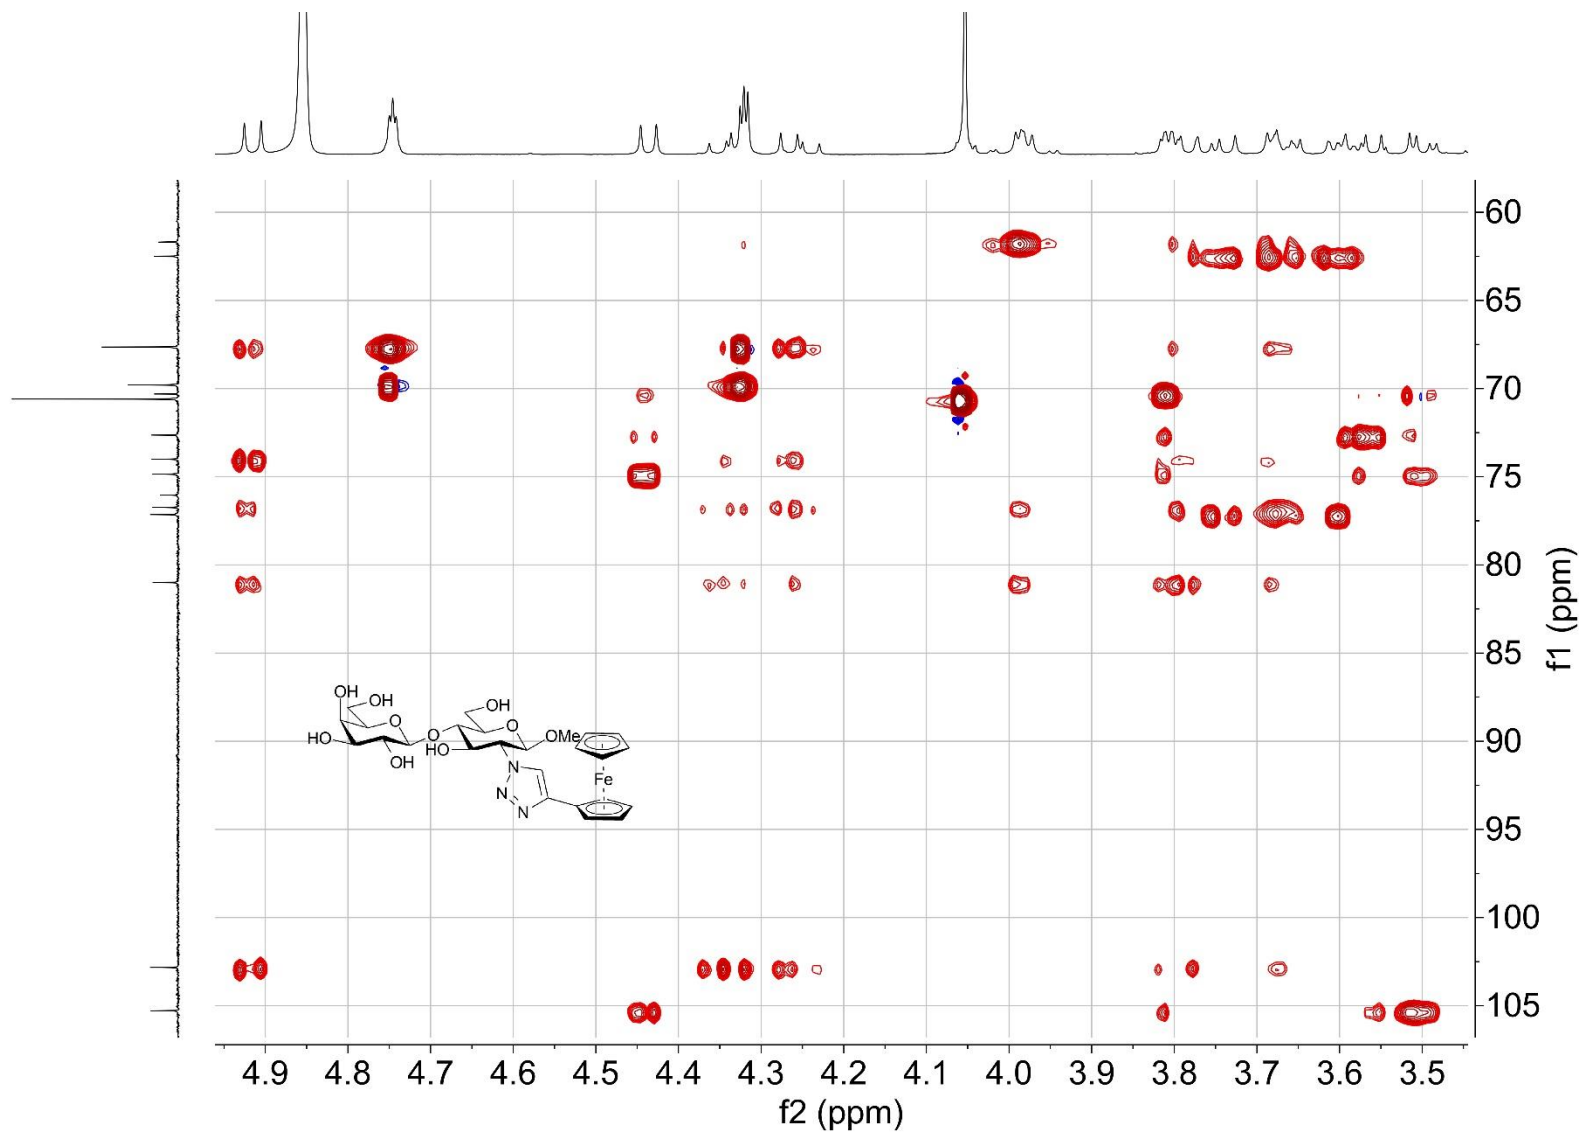

# NMR COMPOUND 22

<sup>1</sup>H NMR (400 MHz, CDCl<sub>3</sub>) 22

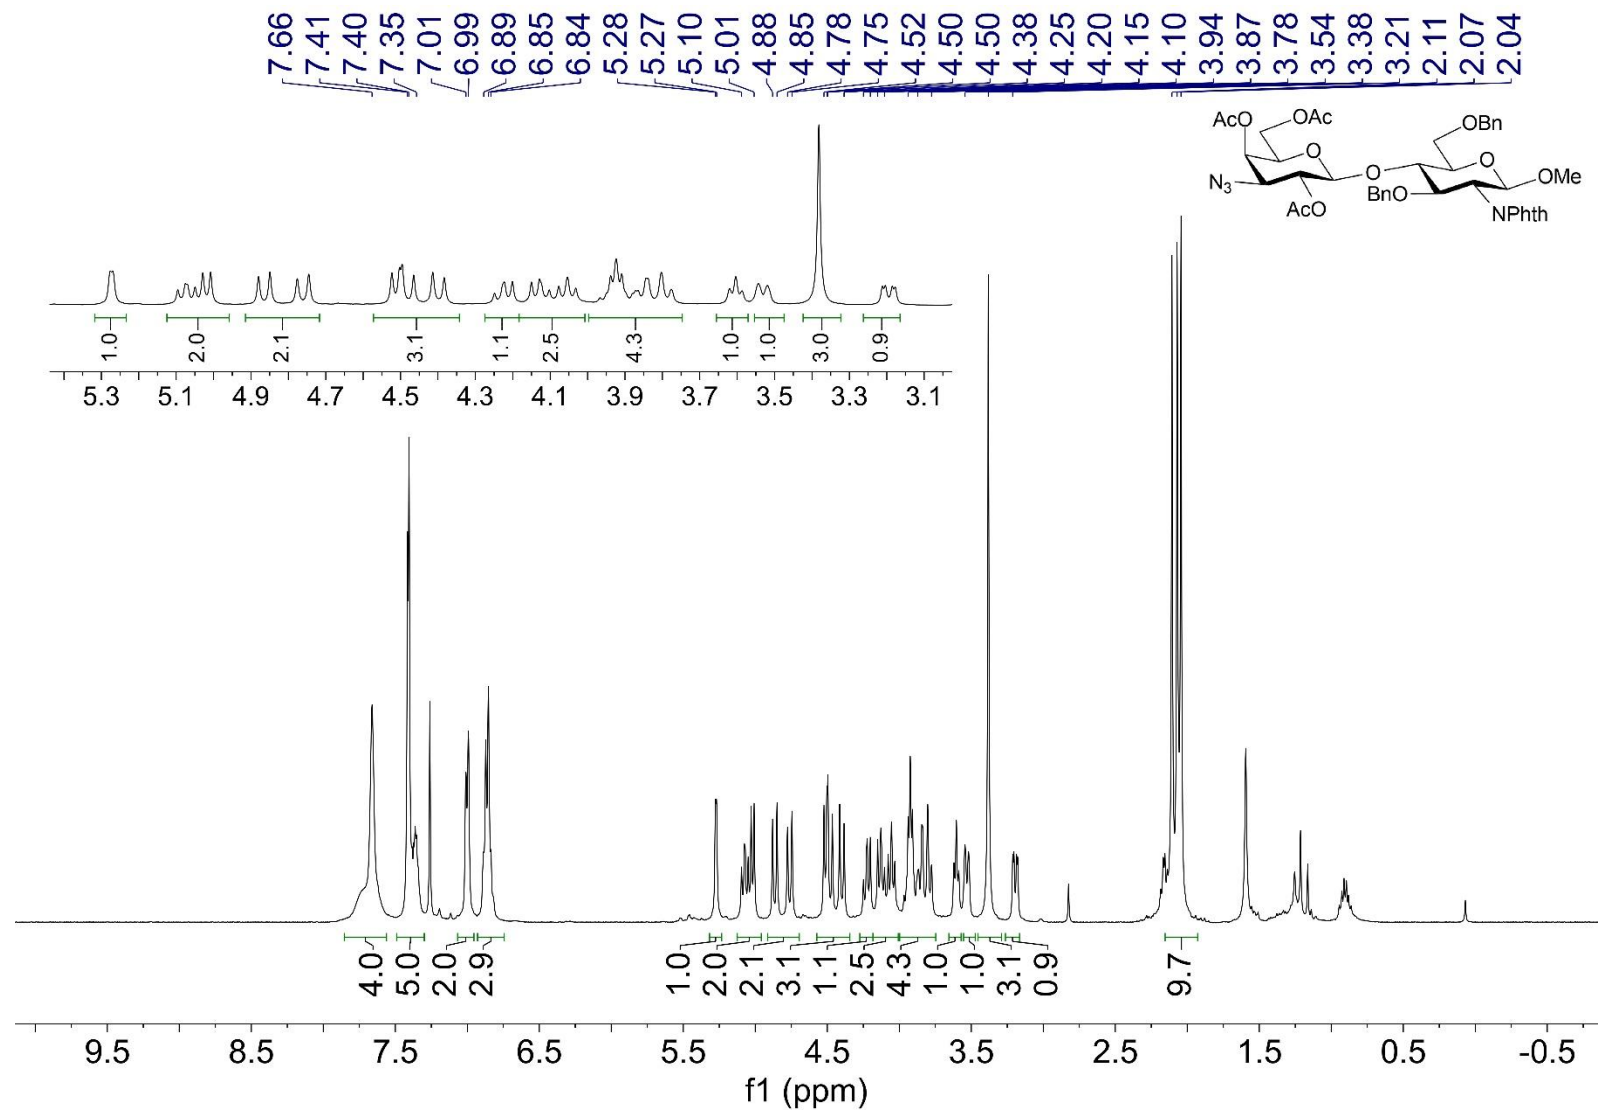

7.66  
7.41  
7.40  
7.35  
7.01  
6.99  
6.89  
6.85  
6.84  
5.28  
5.27  
5.10  
5.01  
4.88  
4.85  
4.78  
4.75  
4.52  
4.50  
4.50  
4.38  
4.25  
4.20  
4.15  
4.10  
3.94  
3.87  
3.78  
3.54  
3.38  
3.21  
2.11  
2.07  
2.04

1.0  
2.0  
2.1  
3.1  
1.1  
2.5  
4.3  
1.0  
1.0  
3.0  
0.9

4.0  
5.0  
2.0  
2.9  
1.0  
2.0  
2.1  
3.1  
1.1  
2.5  
4.3  
1.0  
1.0  
3.1  
0.9  
9.7

<sup>13</sup>C NMR (101 MHz, CDCl<sub>3</sub>) 22

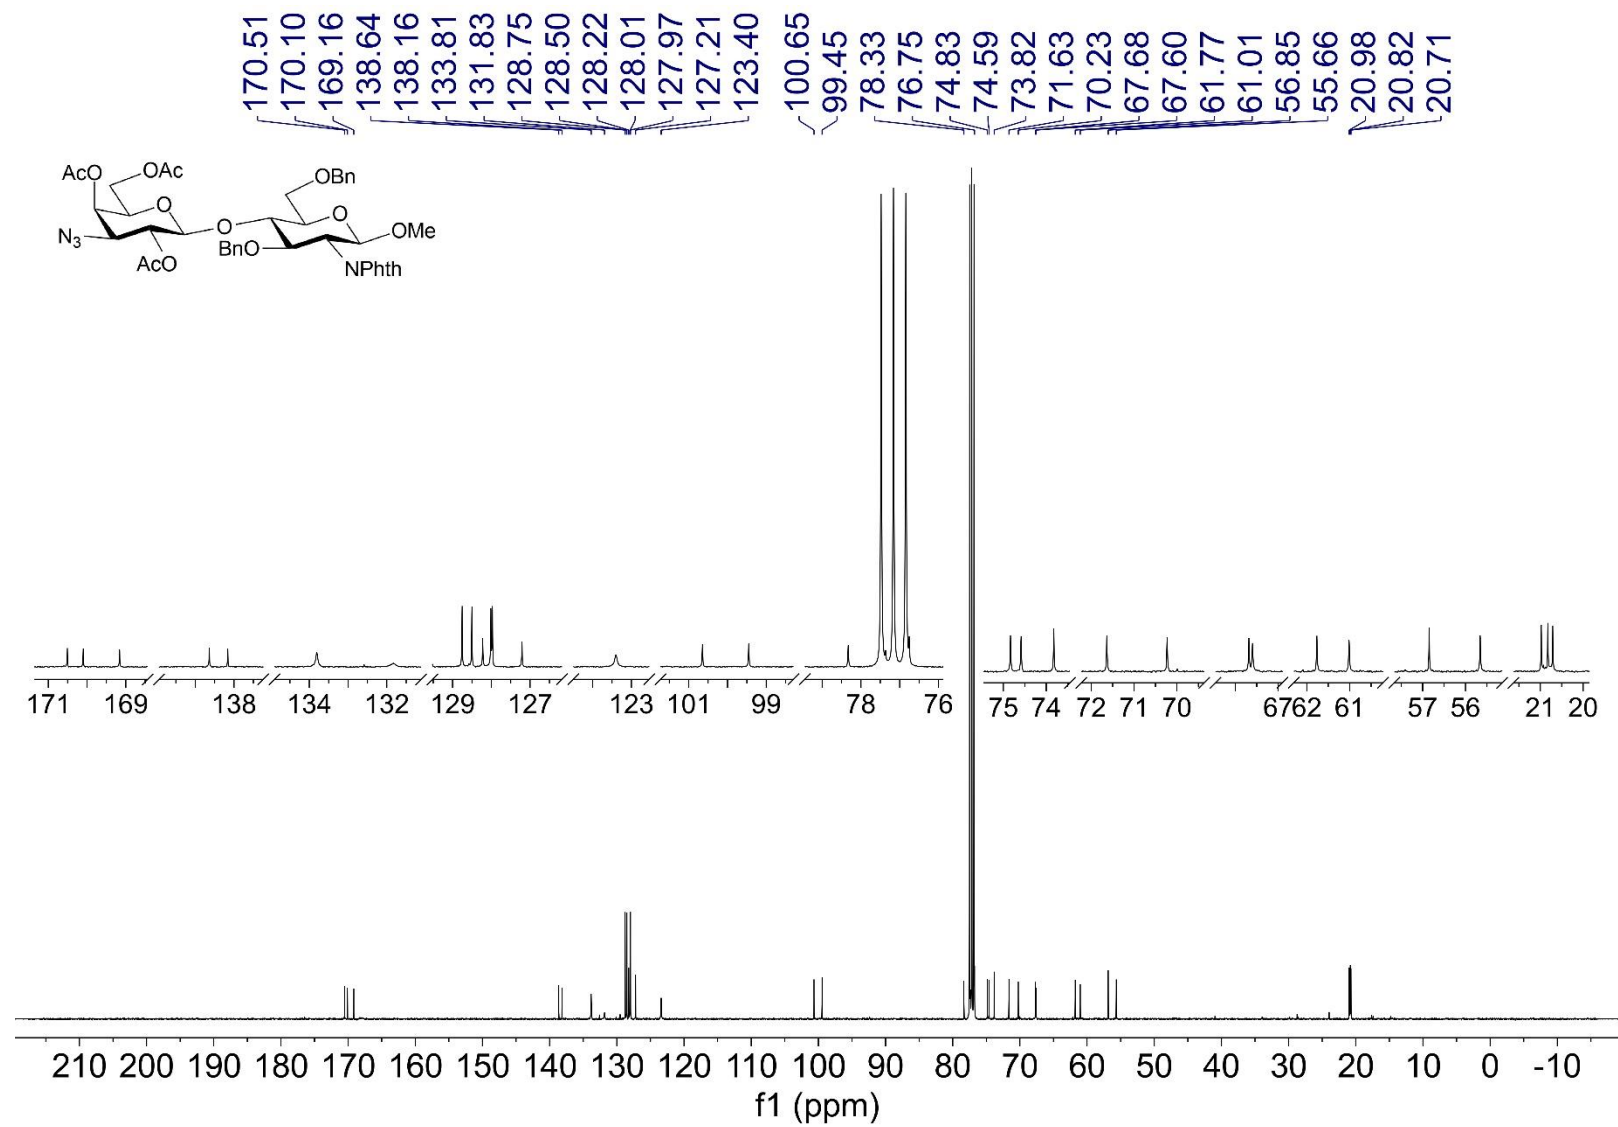



# NMR COMPOUND 23

<sup>1</sup>H NMR (400 MHz, CDCl<sub>3</sub>) 23

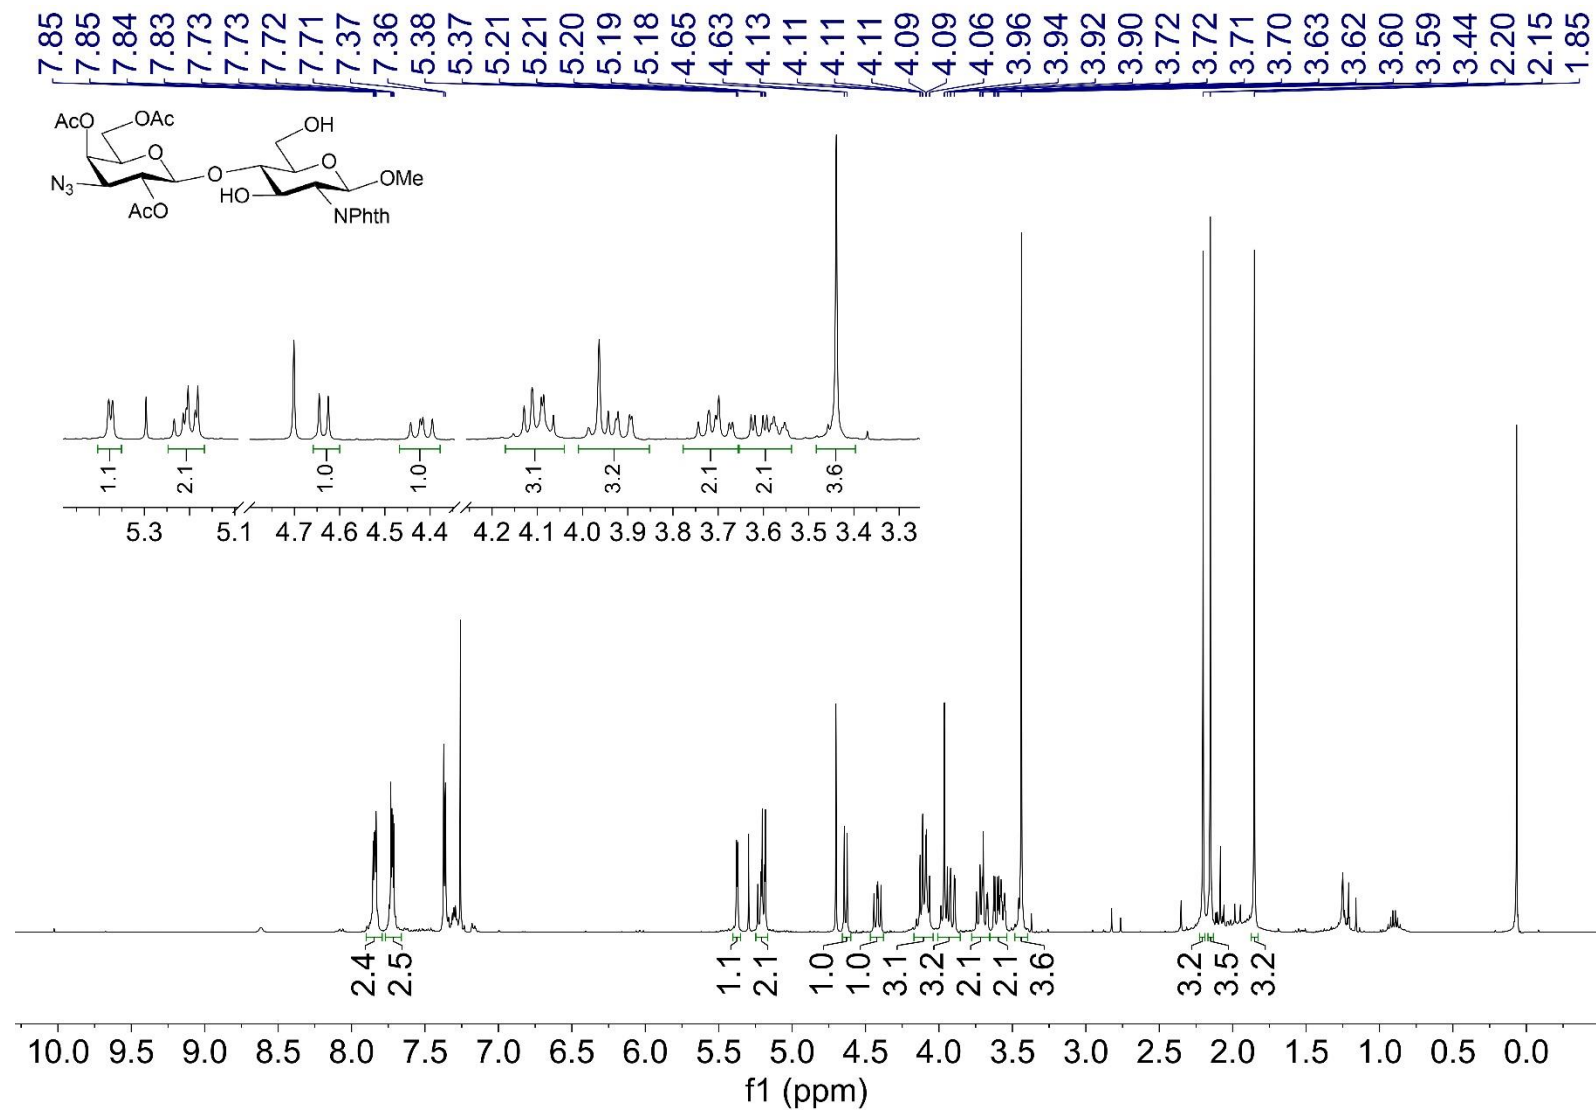

<sup>13</sup>C NMR (101 MHz, CDCl<sub>3</sub>) 23

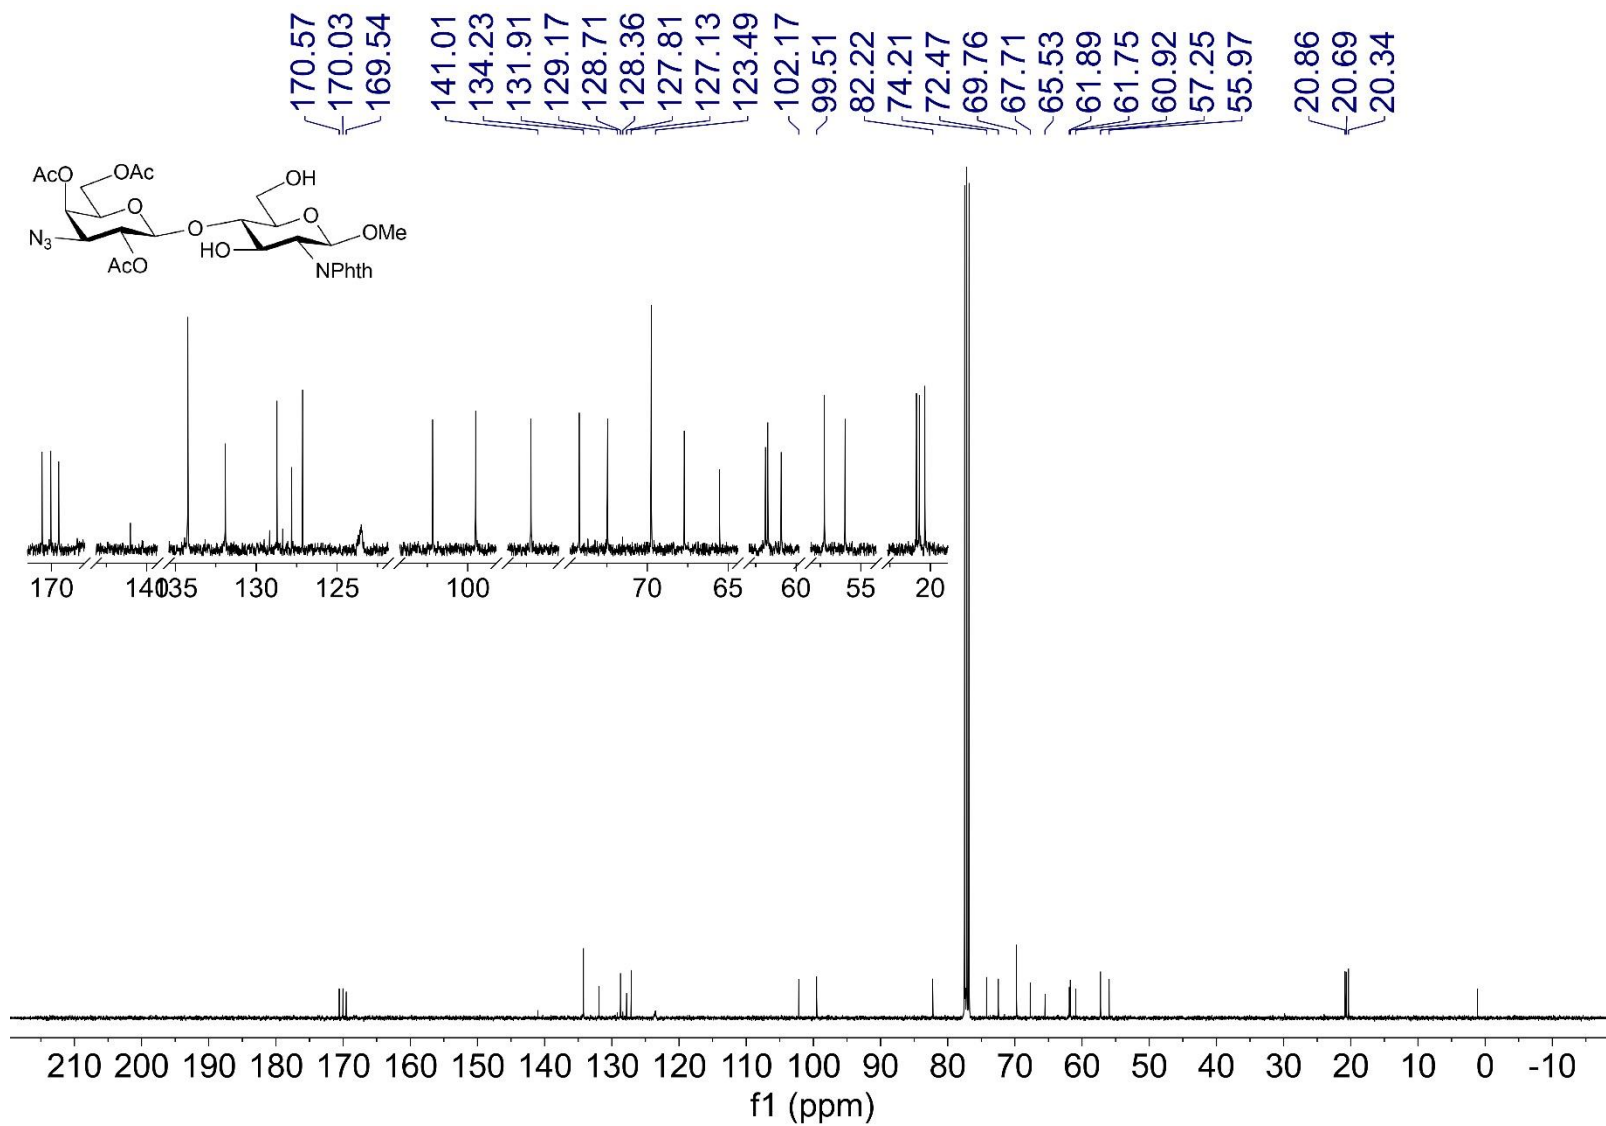

**<sup>1</sup>H-<sup>1</sup>H COSY 23**

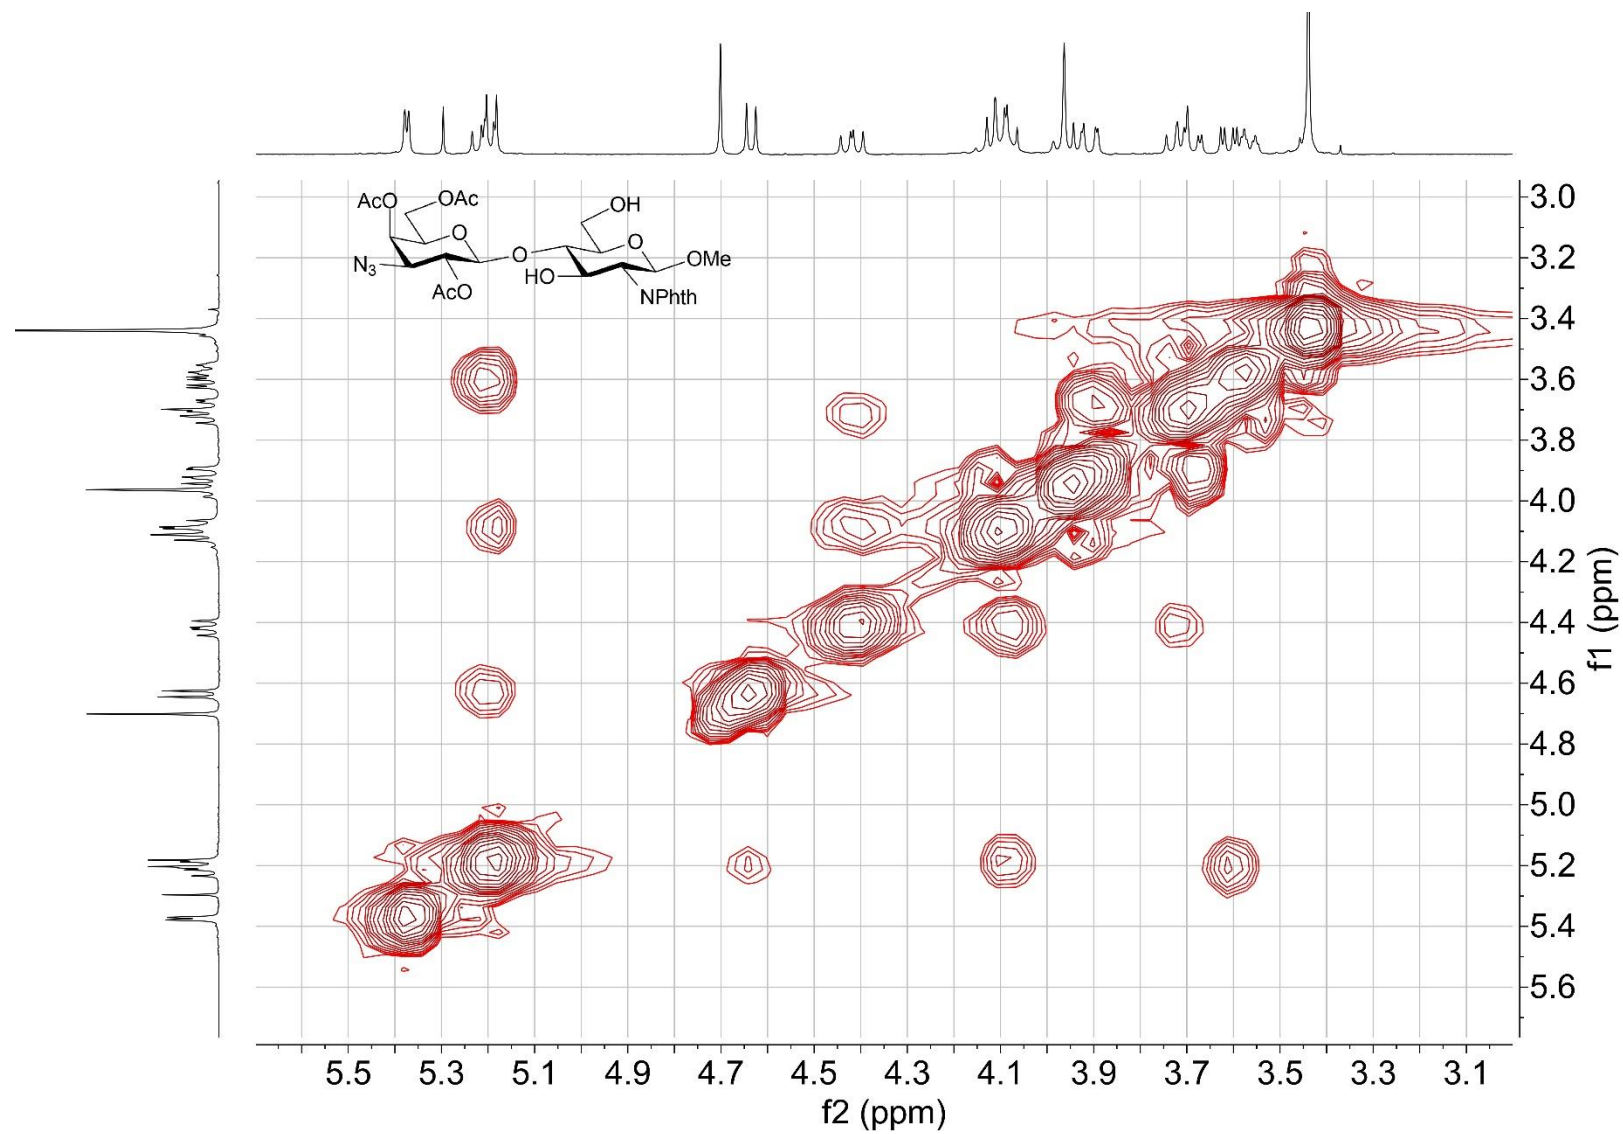

$^1\text{H}$ - $^{13}\text{C}$  HSQC 23

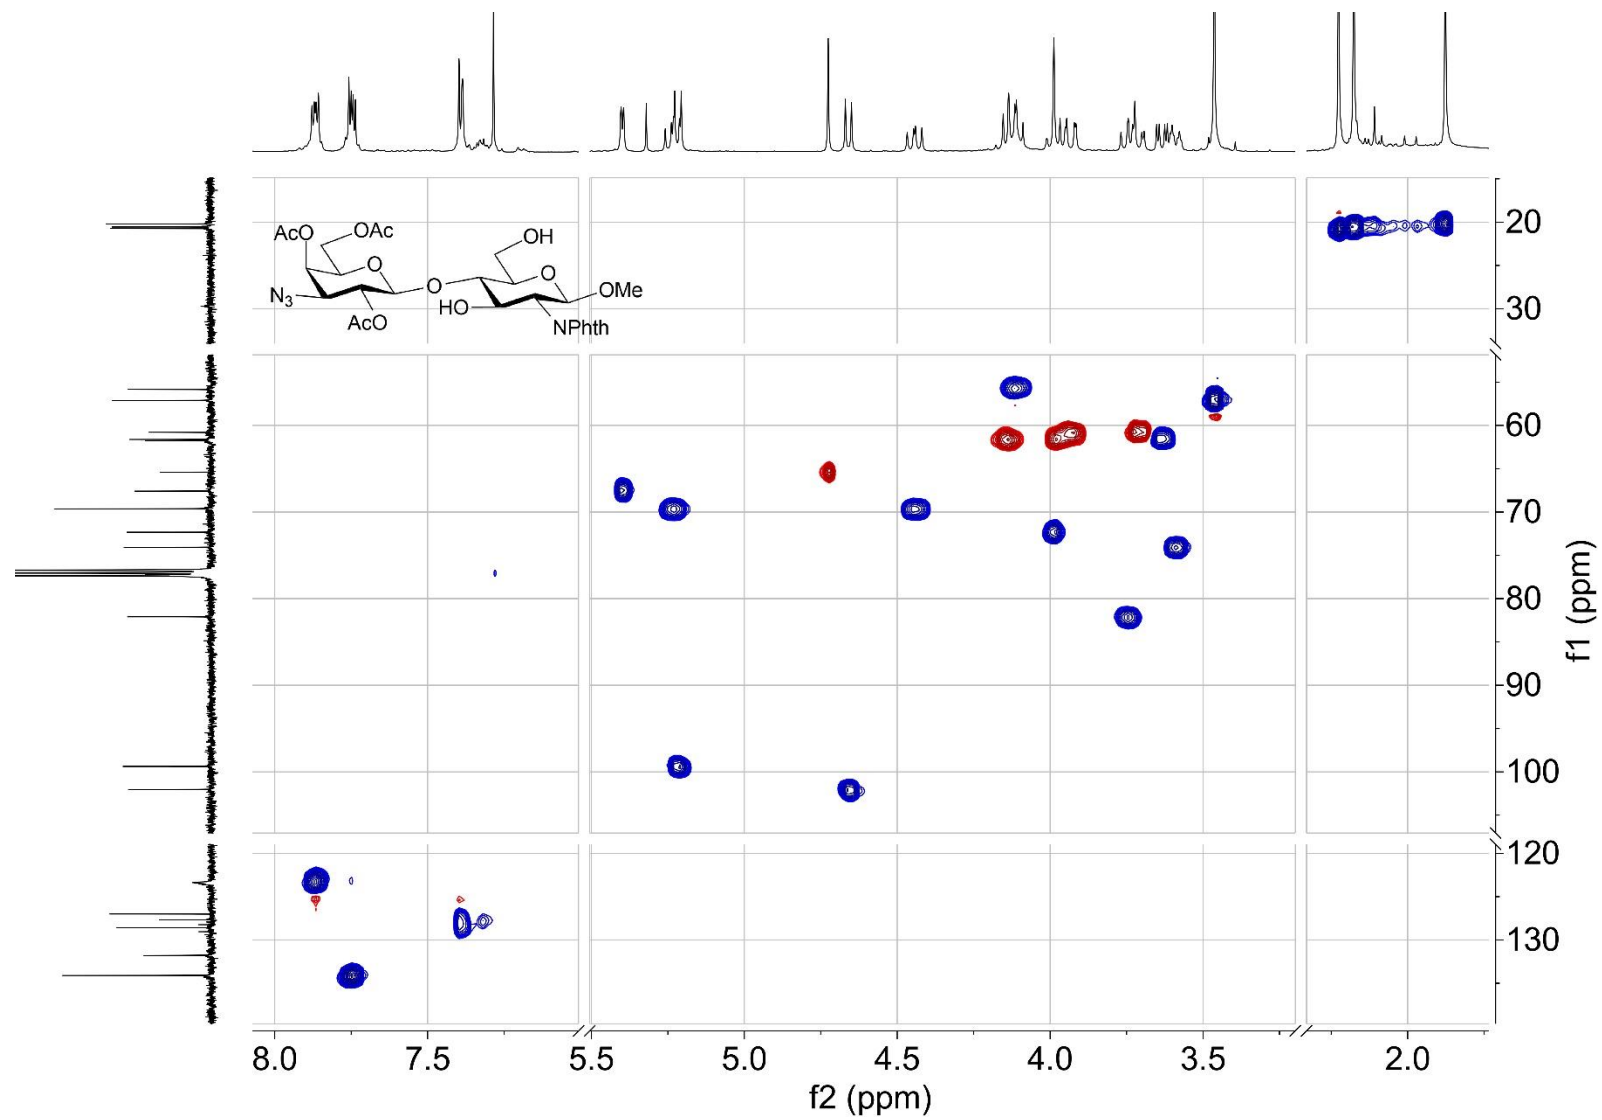

$^1\text{H}$ - $^{13}\text{C}$  HMBC 23

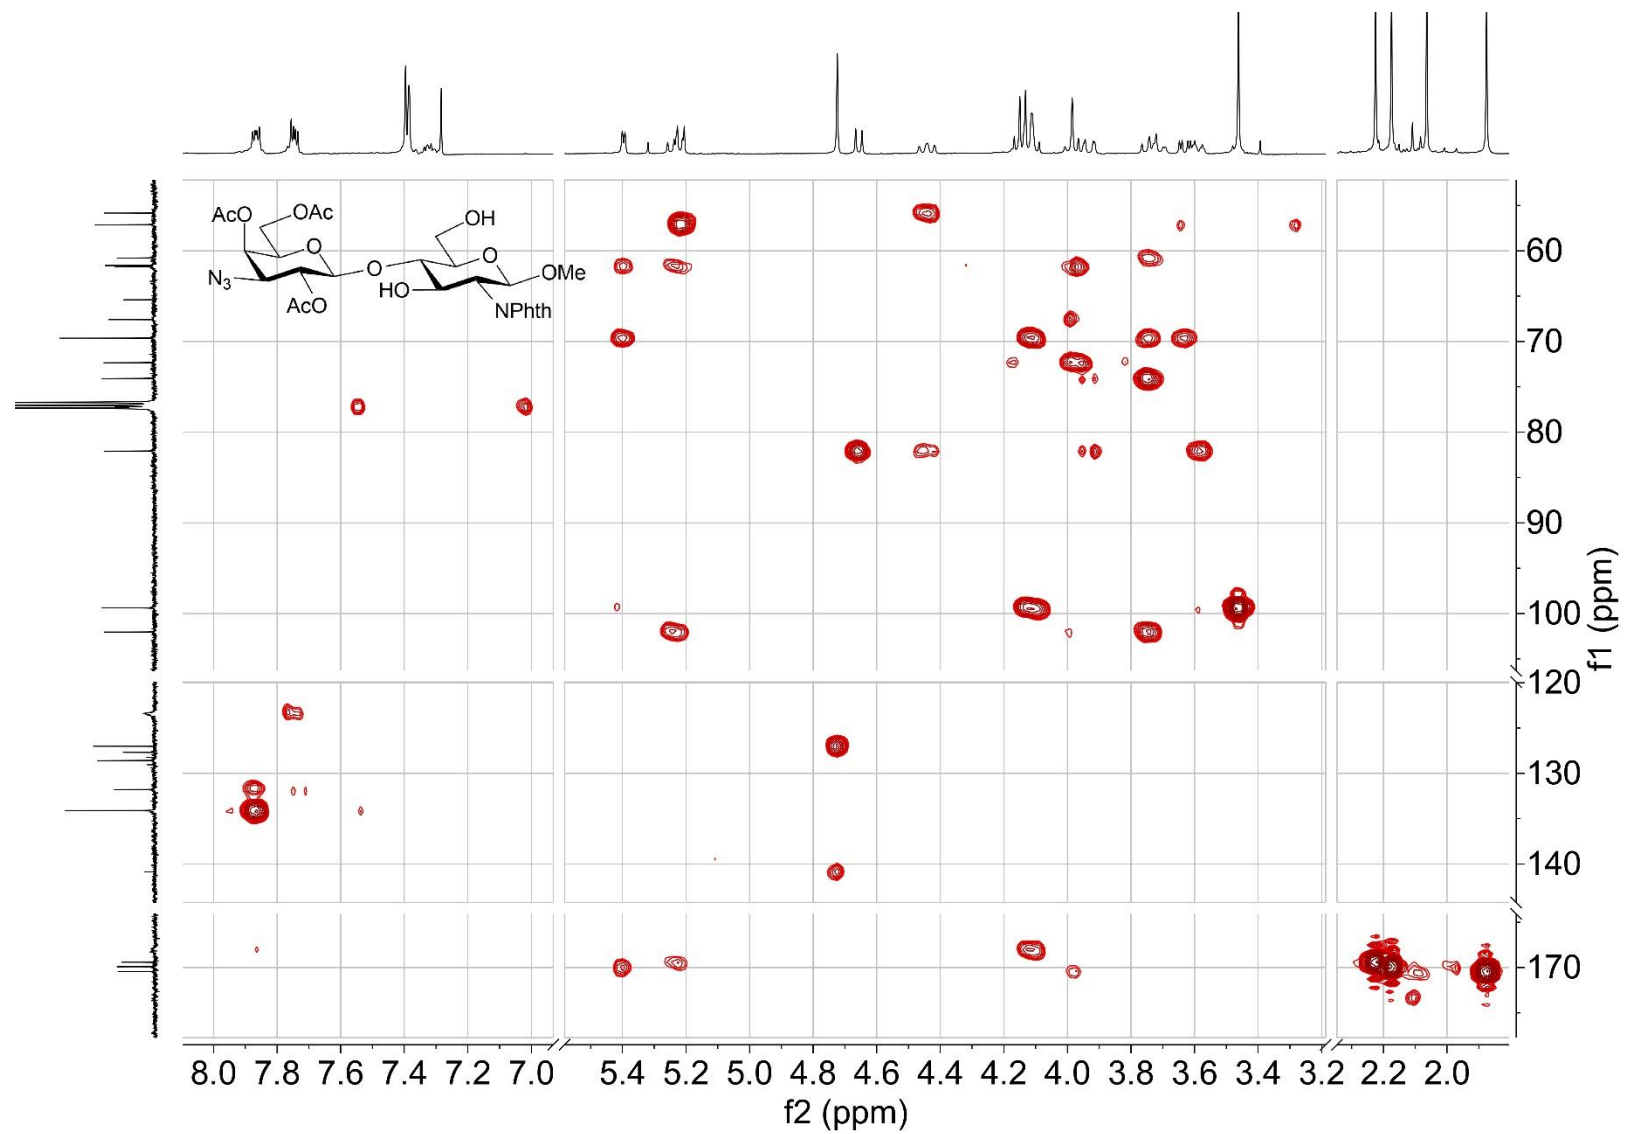

$^1\text{H}$ - $^{13}\text{C}$  HSQCTOCSY 23

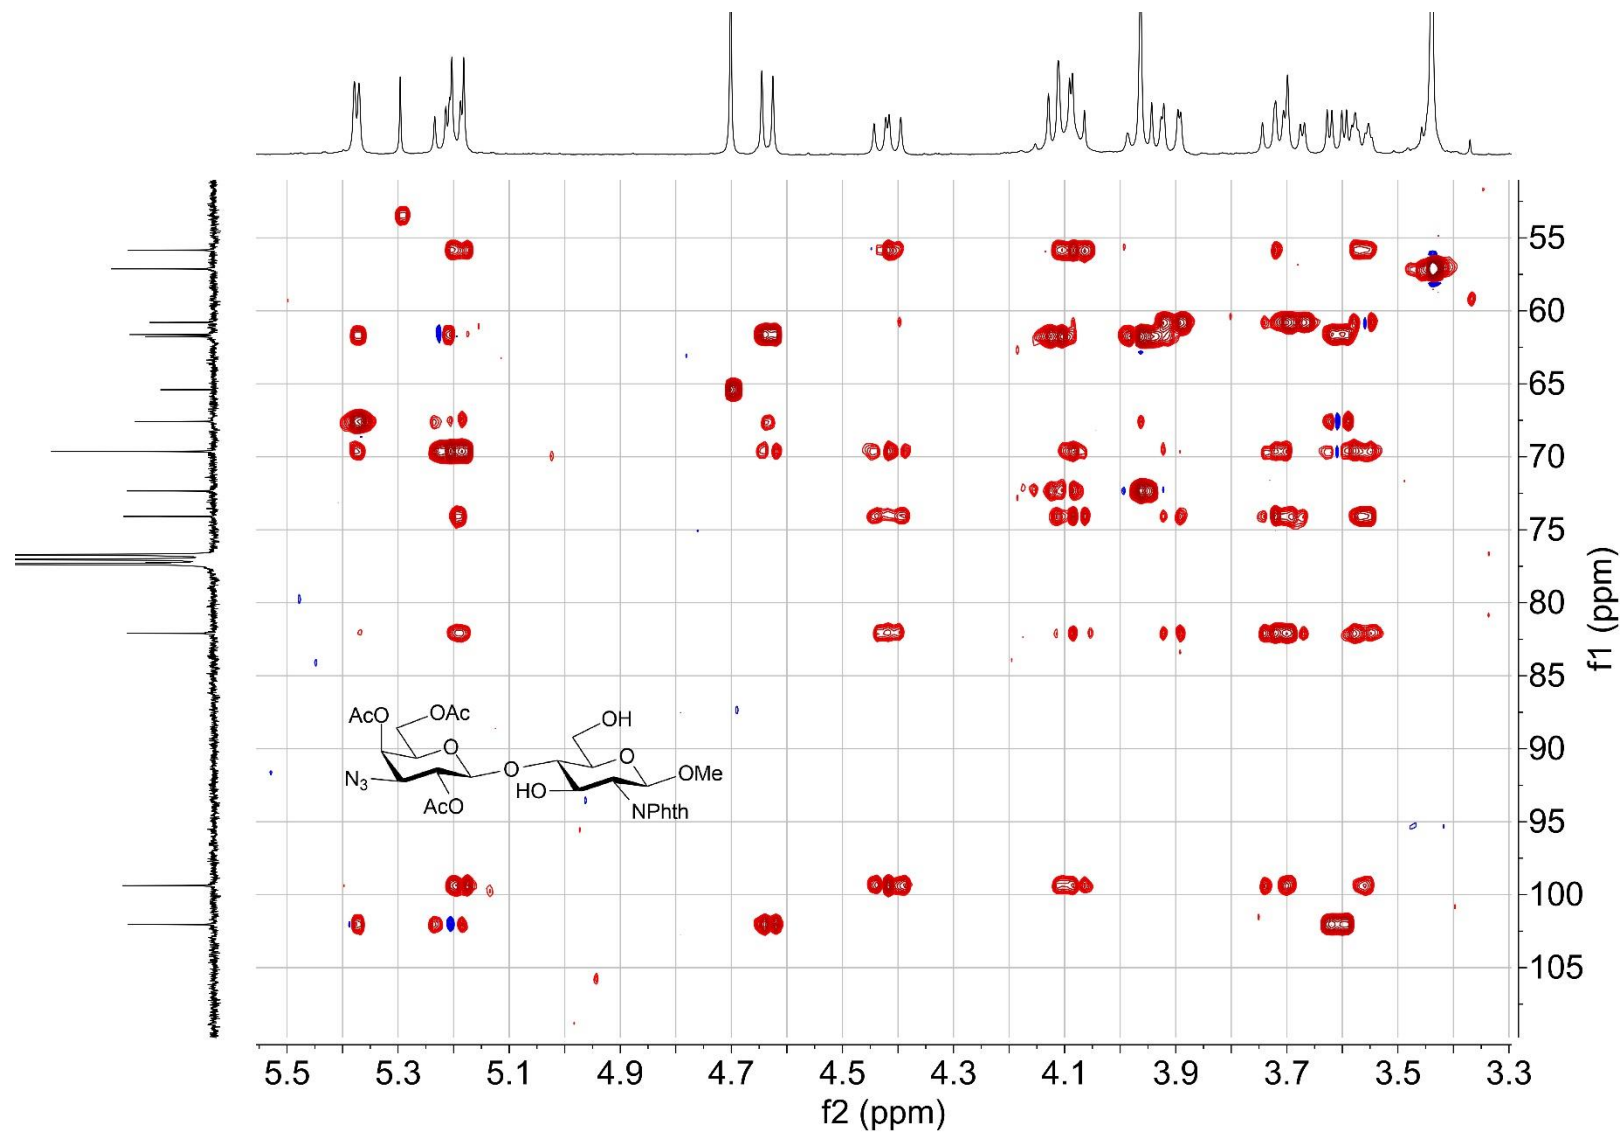

# NMR COMPOUND 24

## <sup>1</sup>H NMR (400 MHz, MeOD) 24

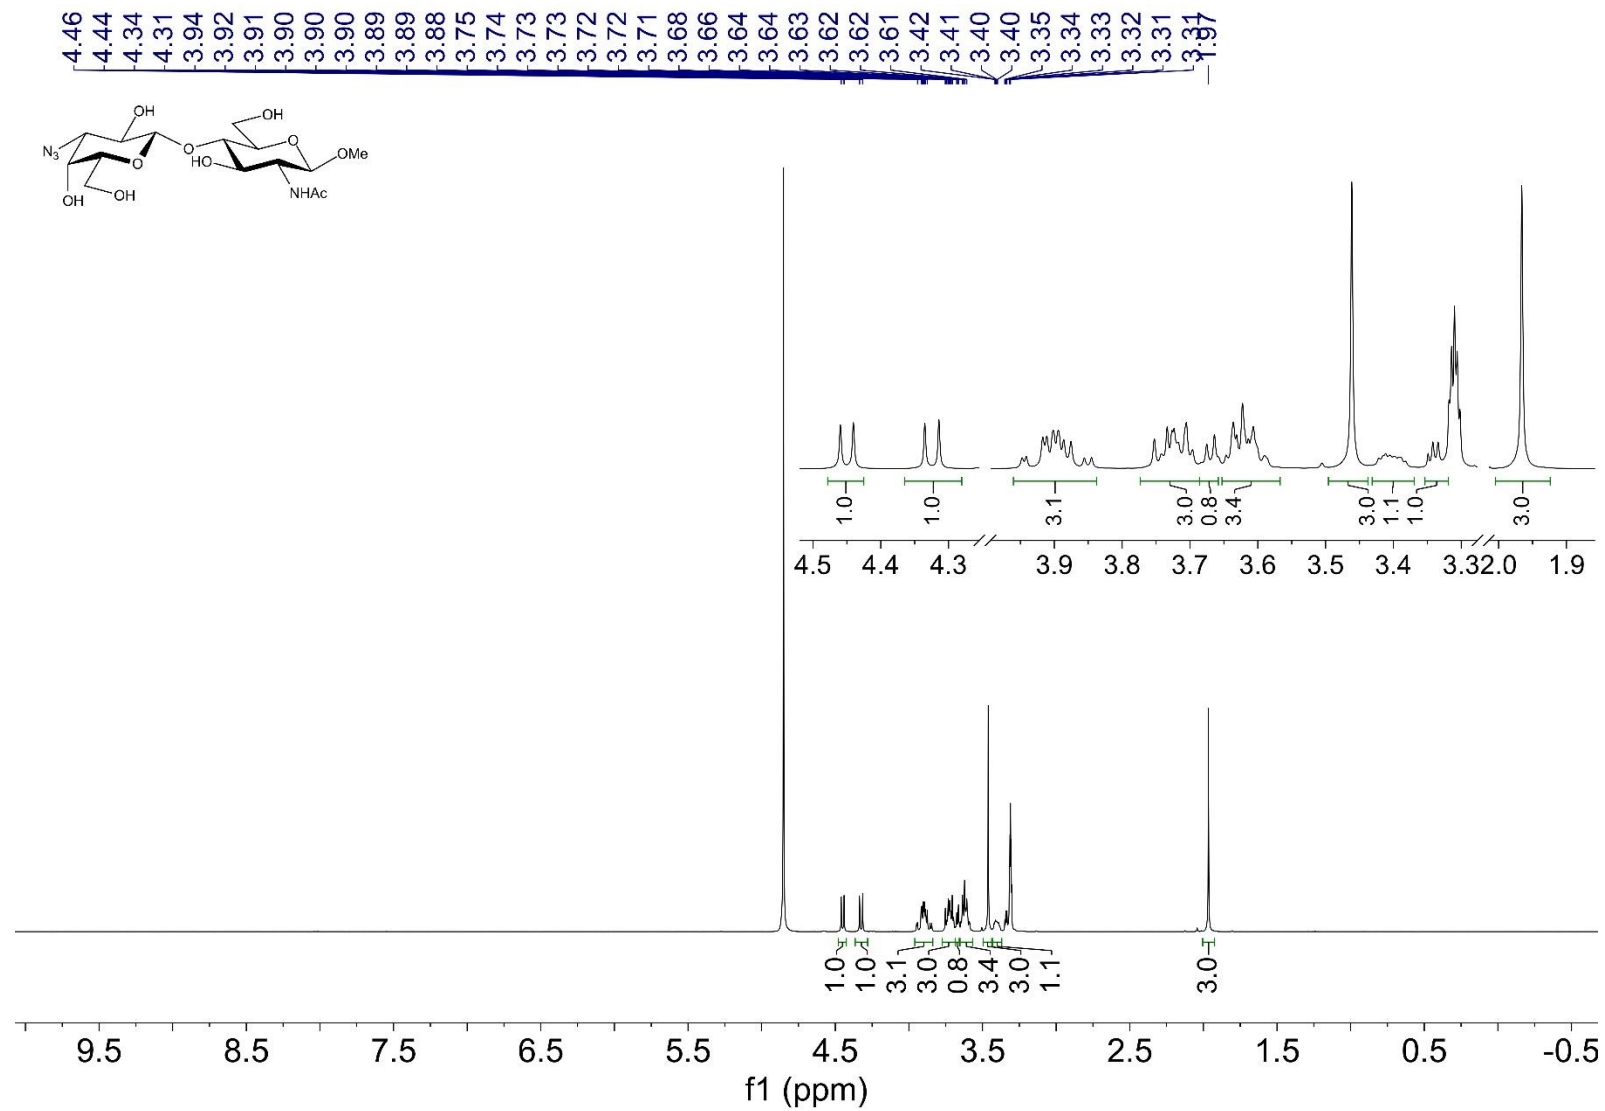

<sup>13</sup>C NMR (101 MHz, MeOD) 24

173.58

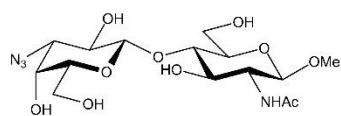

105.08

103.61

80.72  
77.77  
76.60  
74.29  
70.71  
69.44  
66.73  
62.38  
61.79  
57.02  
56.56

22.91

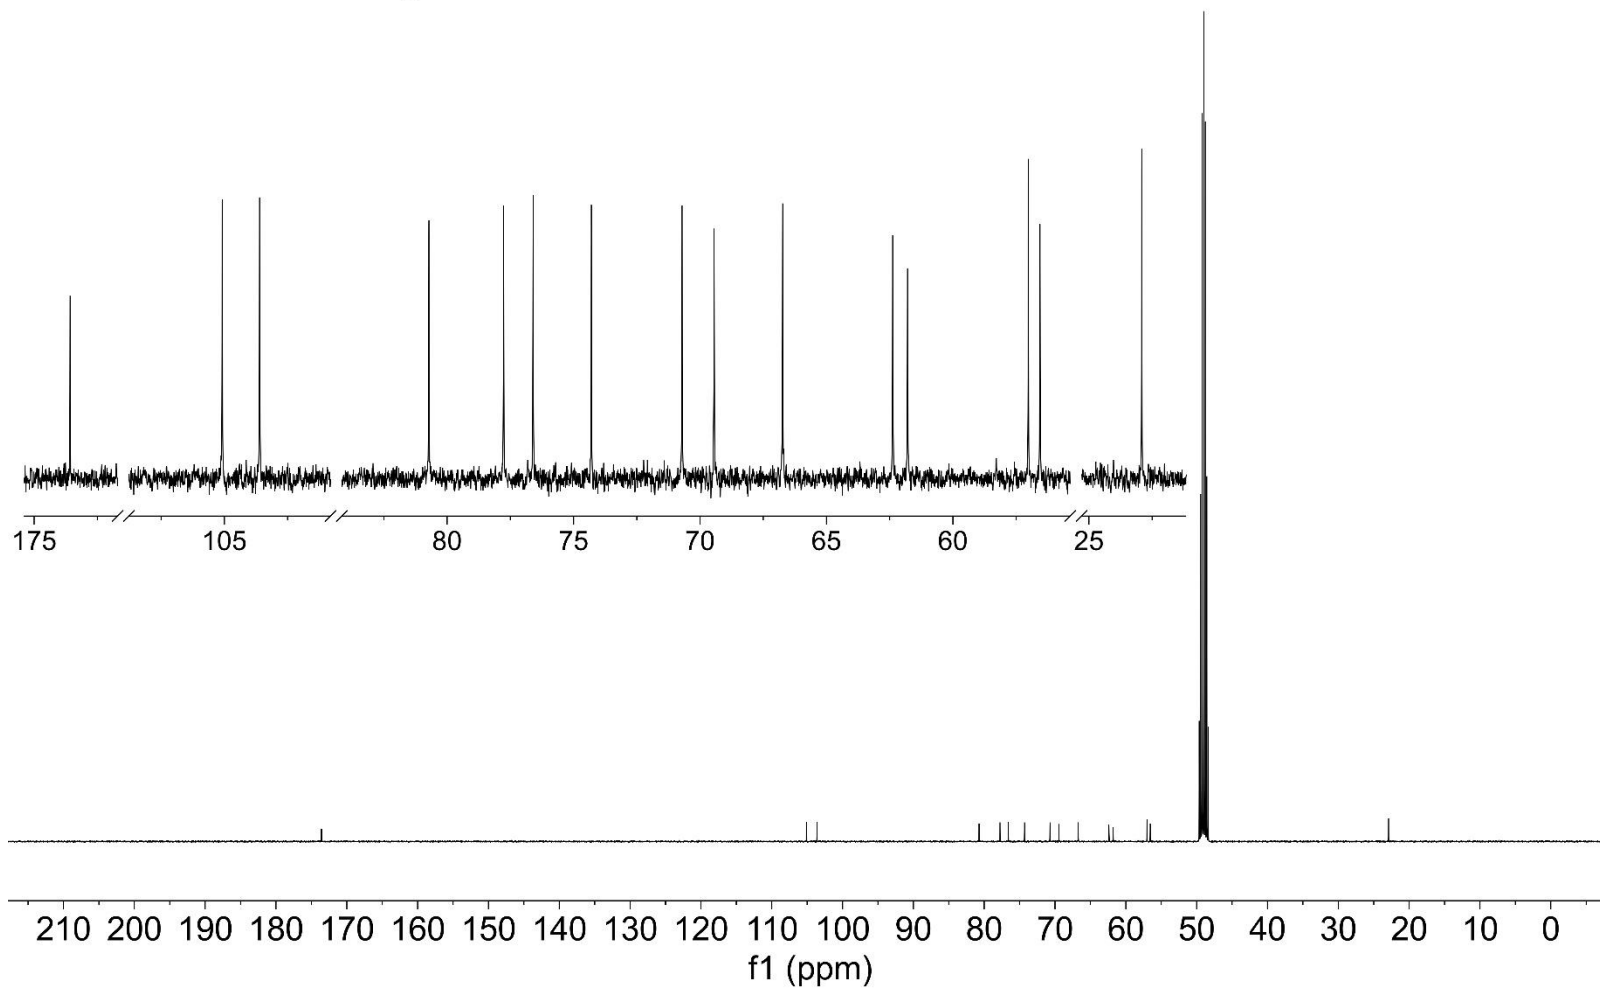



<sup>1</sup>H-<sup>1</sup>H COSY 24

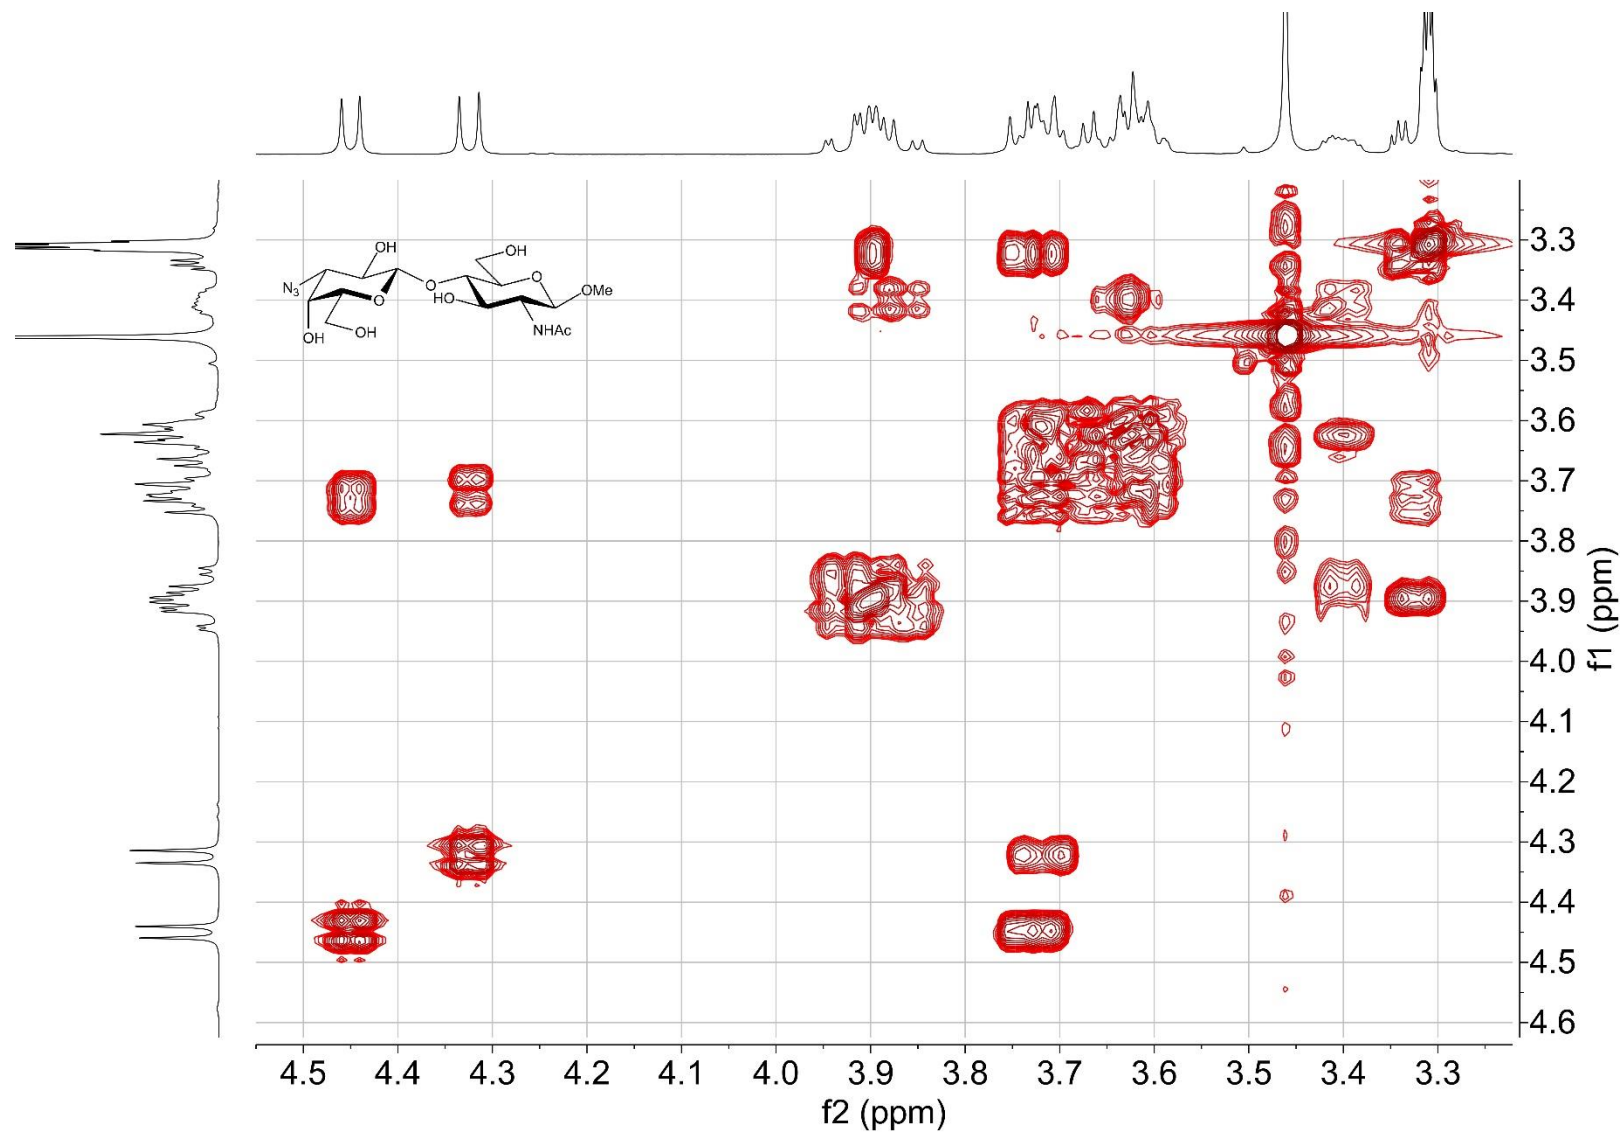

$^1\text{H}$ - $^{13}\text{C}$  HSQC 24

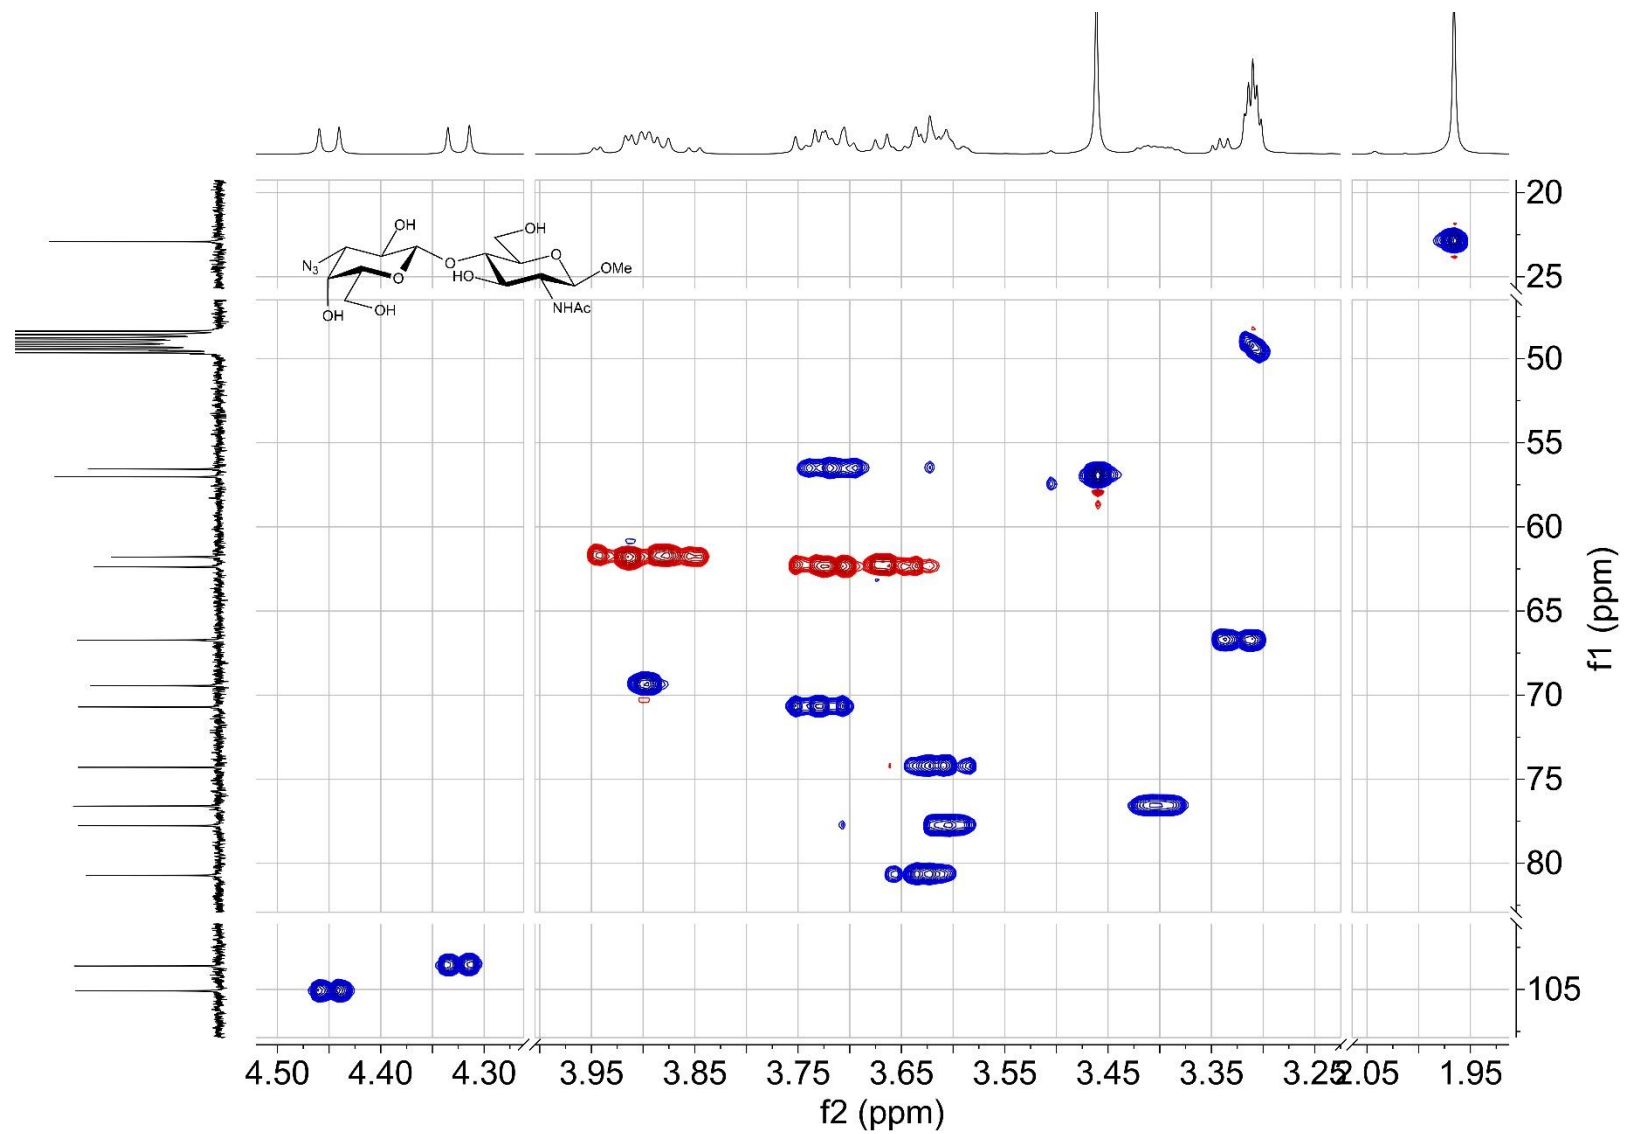

$^1\text{H}$ - $^{13}\text{C}$  HMBC 24

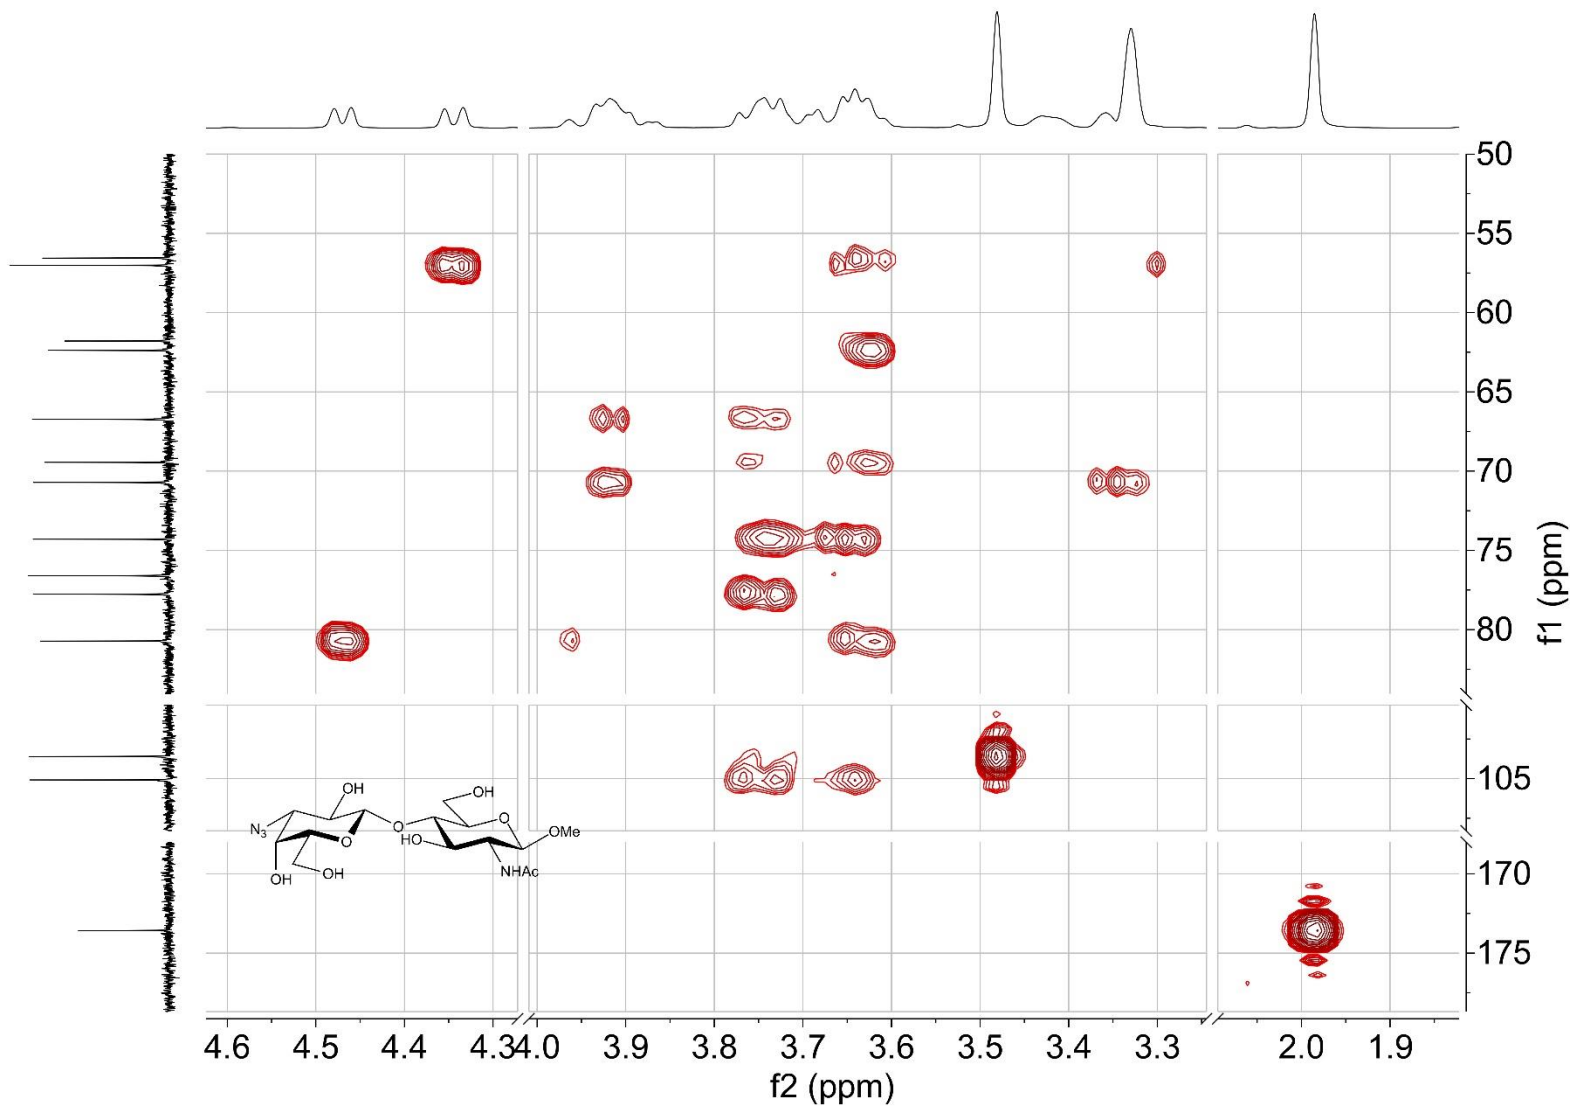

# NMR COMPOUND 25

## <sup>1</sup>H NMR (400 MHz, MeOD) 25

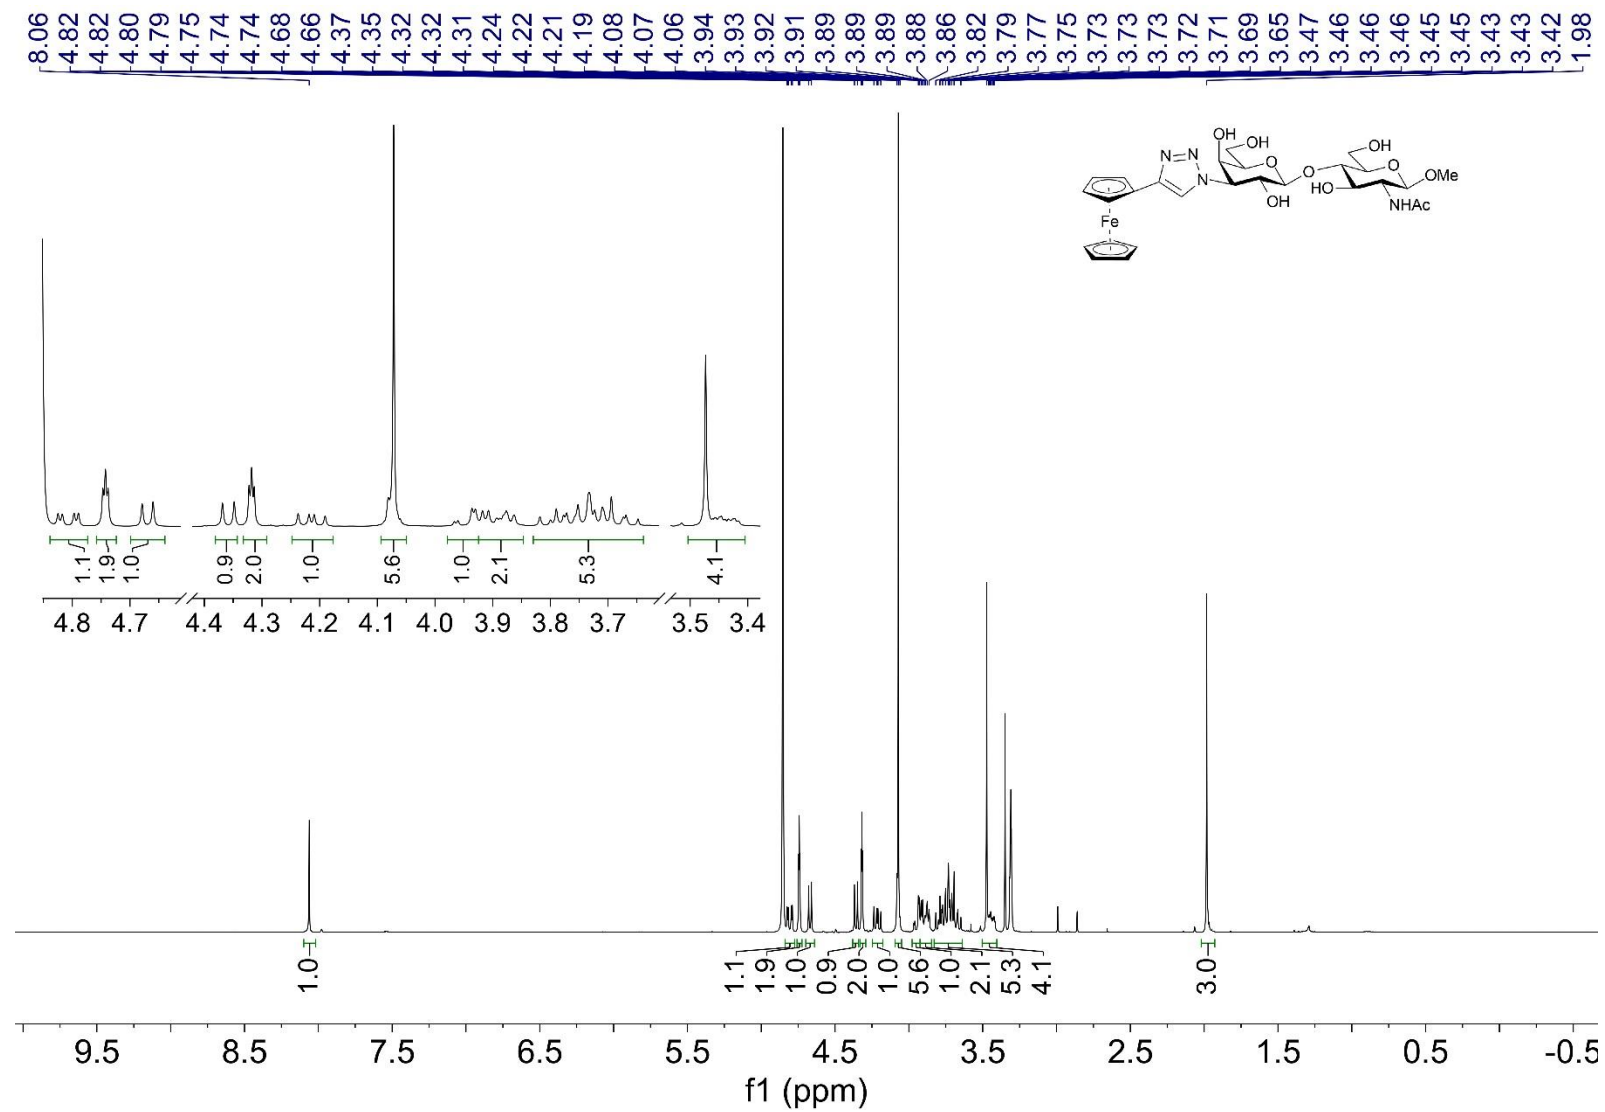

<sup>13</sup>C NMR (101 MHz, MeOD) 25

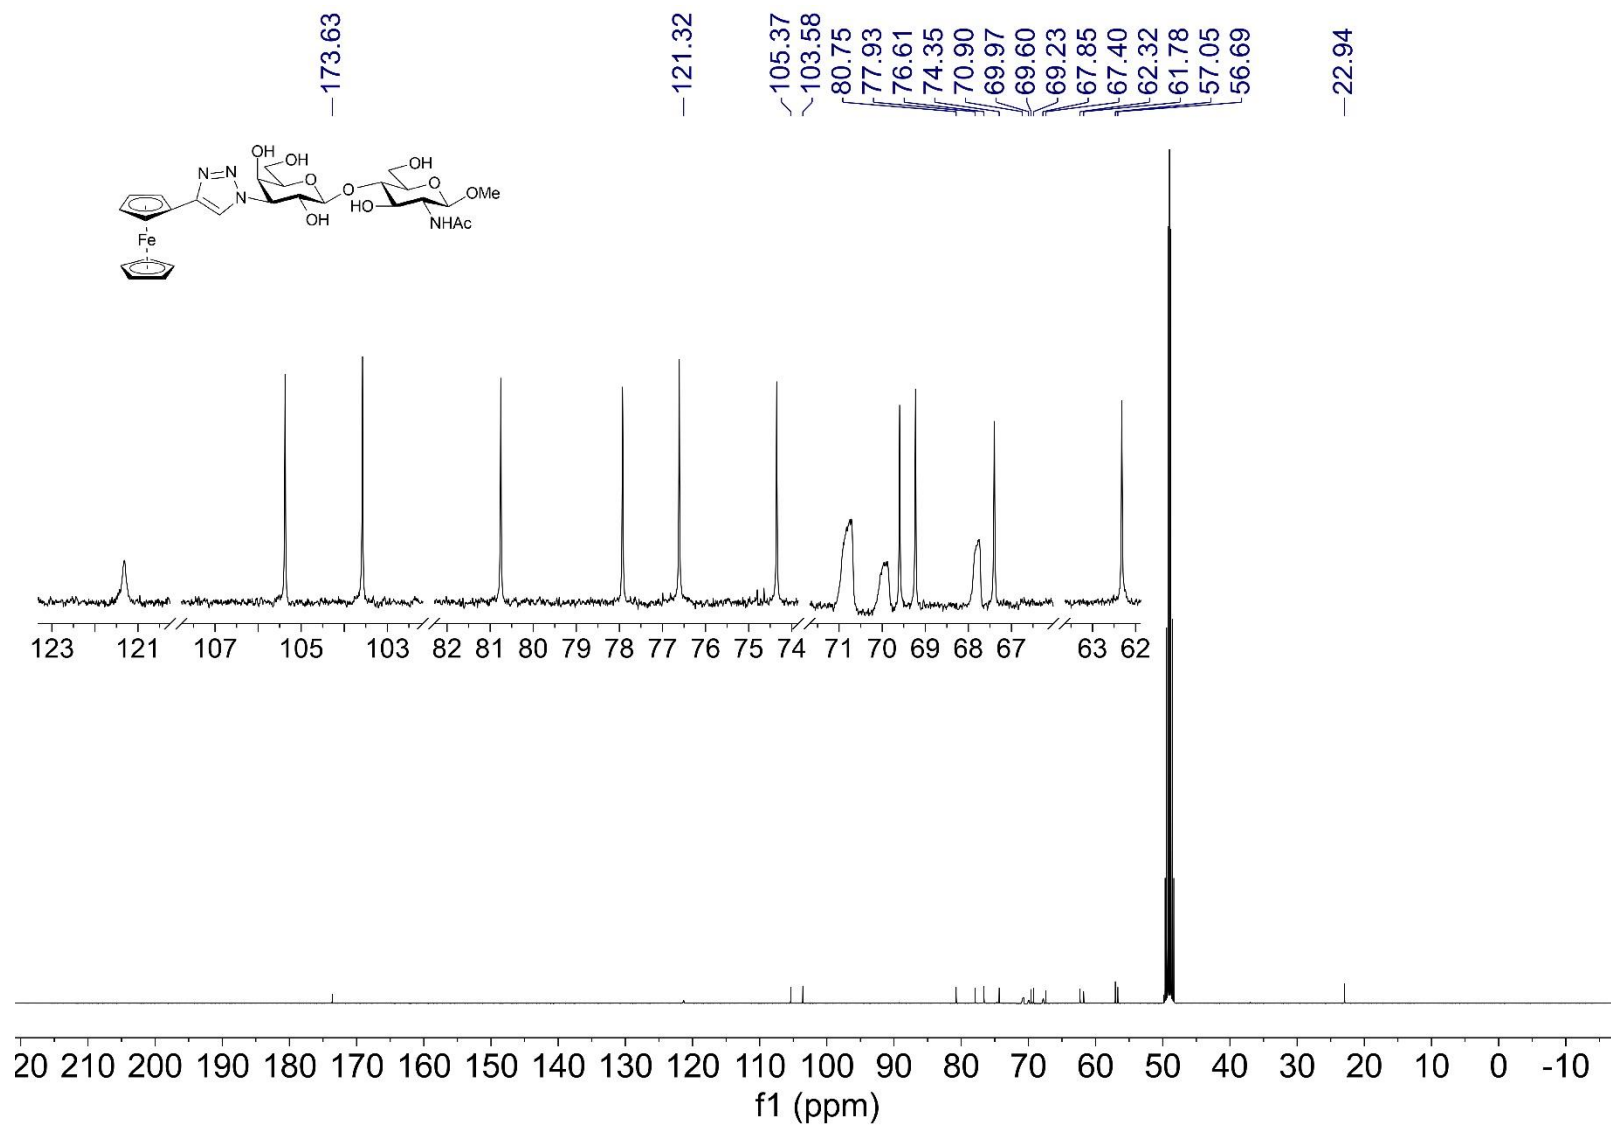

<sup>1</sup>H-<sup>1</sup>H COSY 25

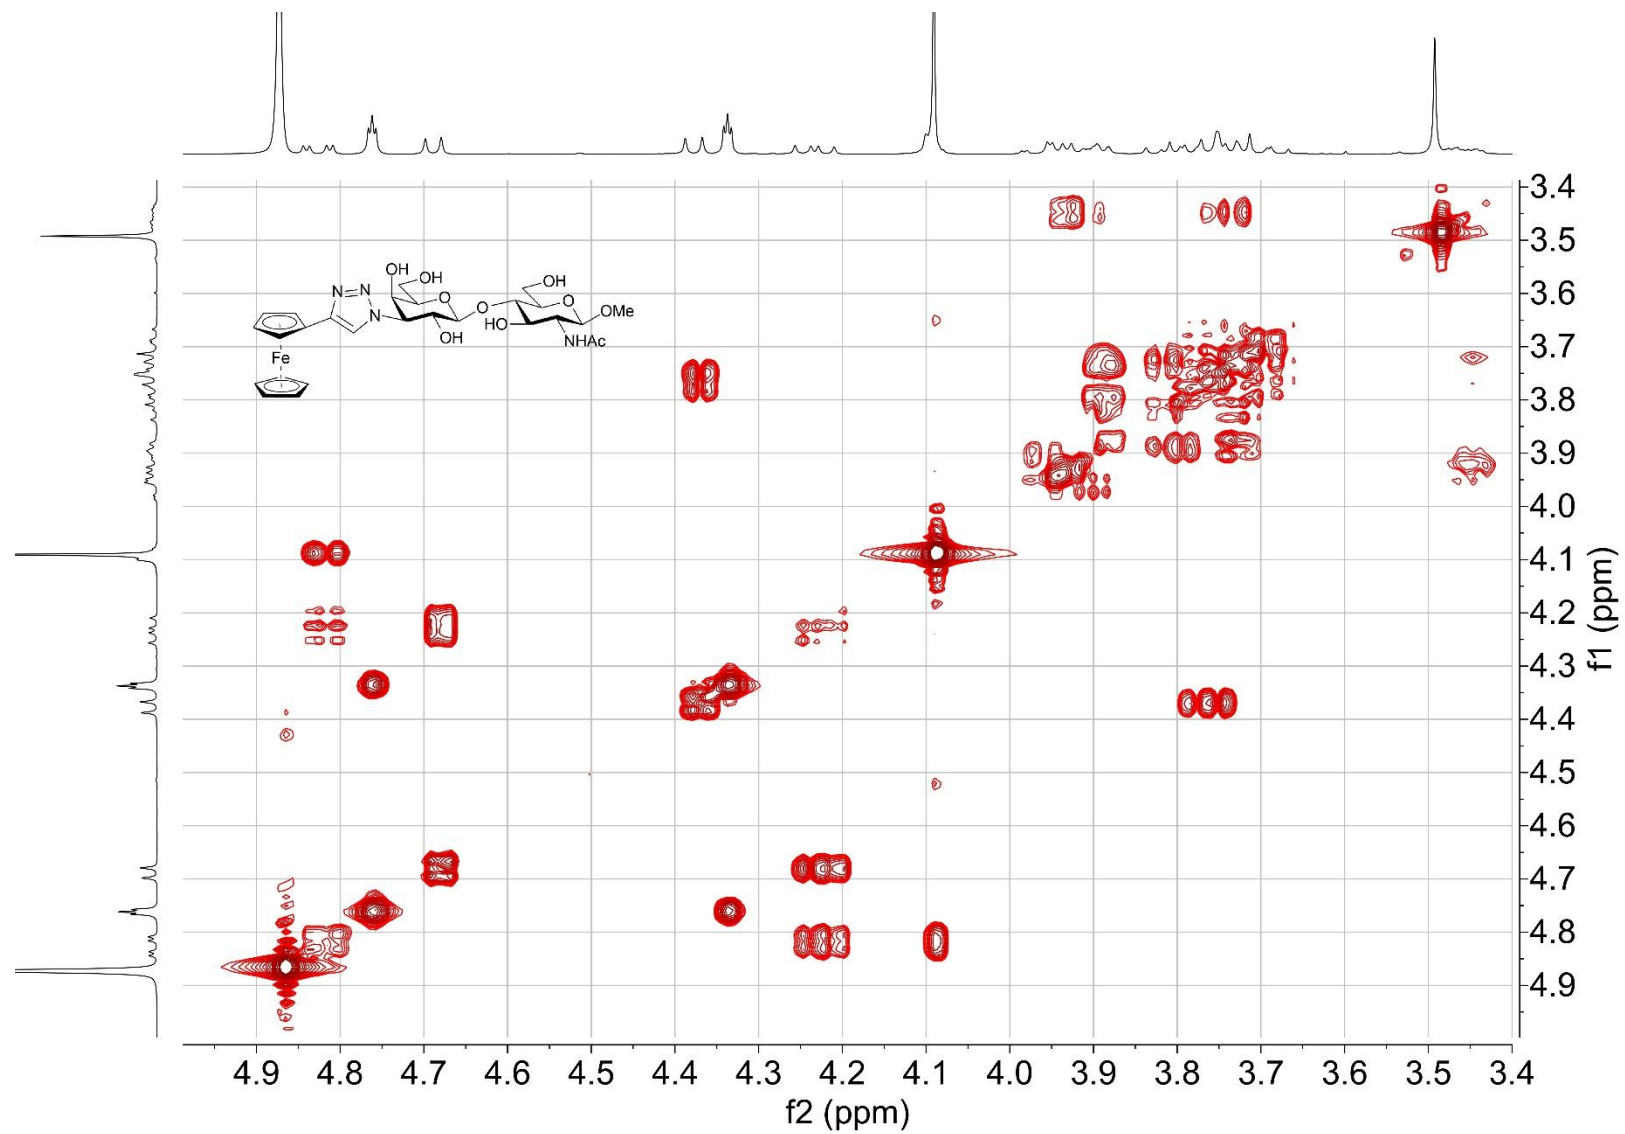

$^1\text{H}$ - $^{13}\text{C}$  HSQC 25

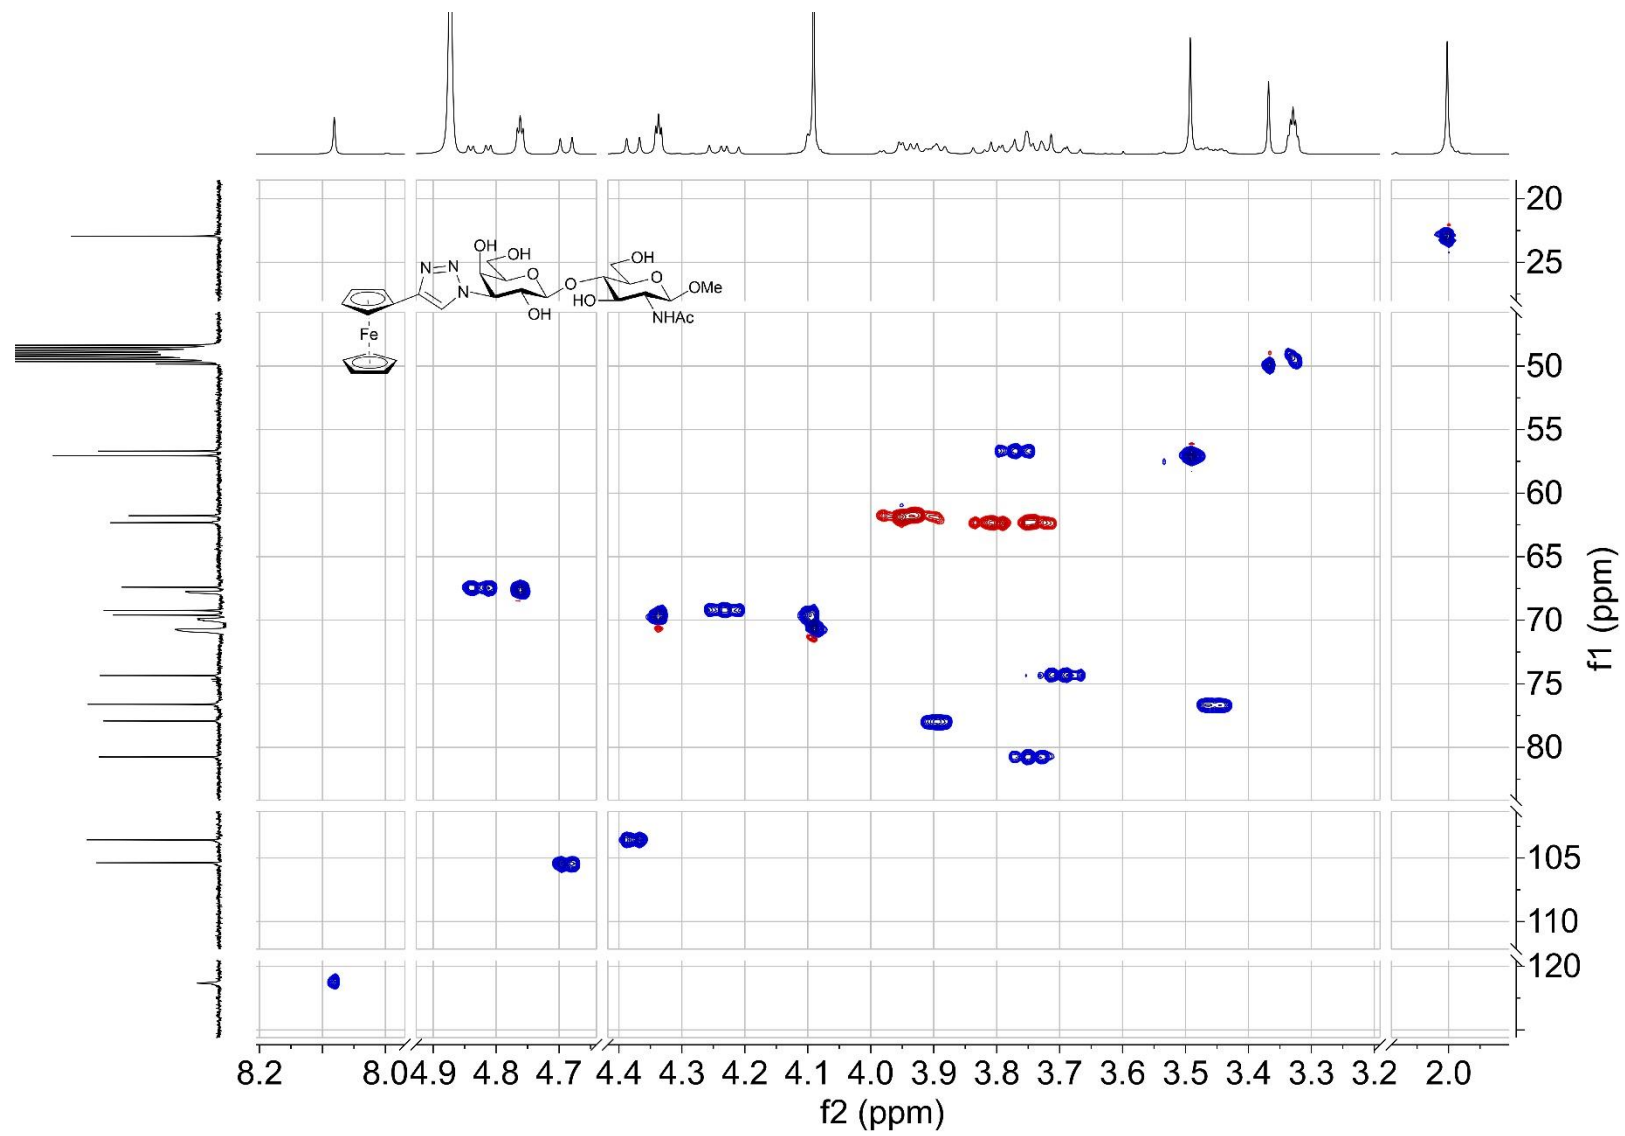

<sup>1</sup>H-<sup>13</sup>C HMBC 25

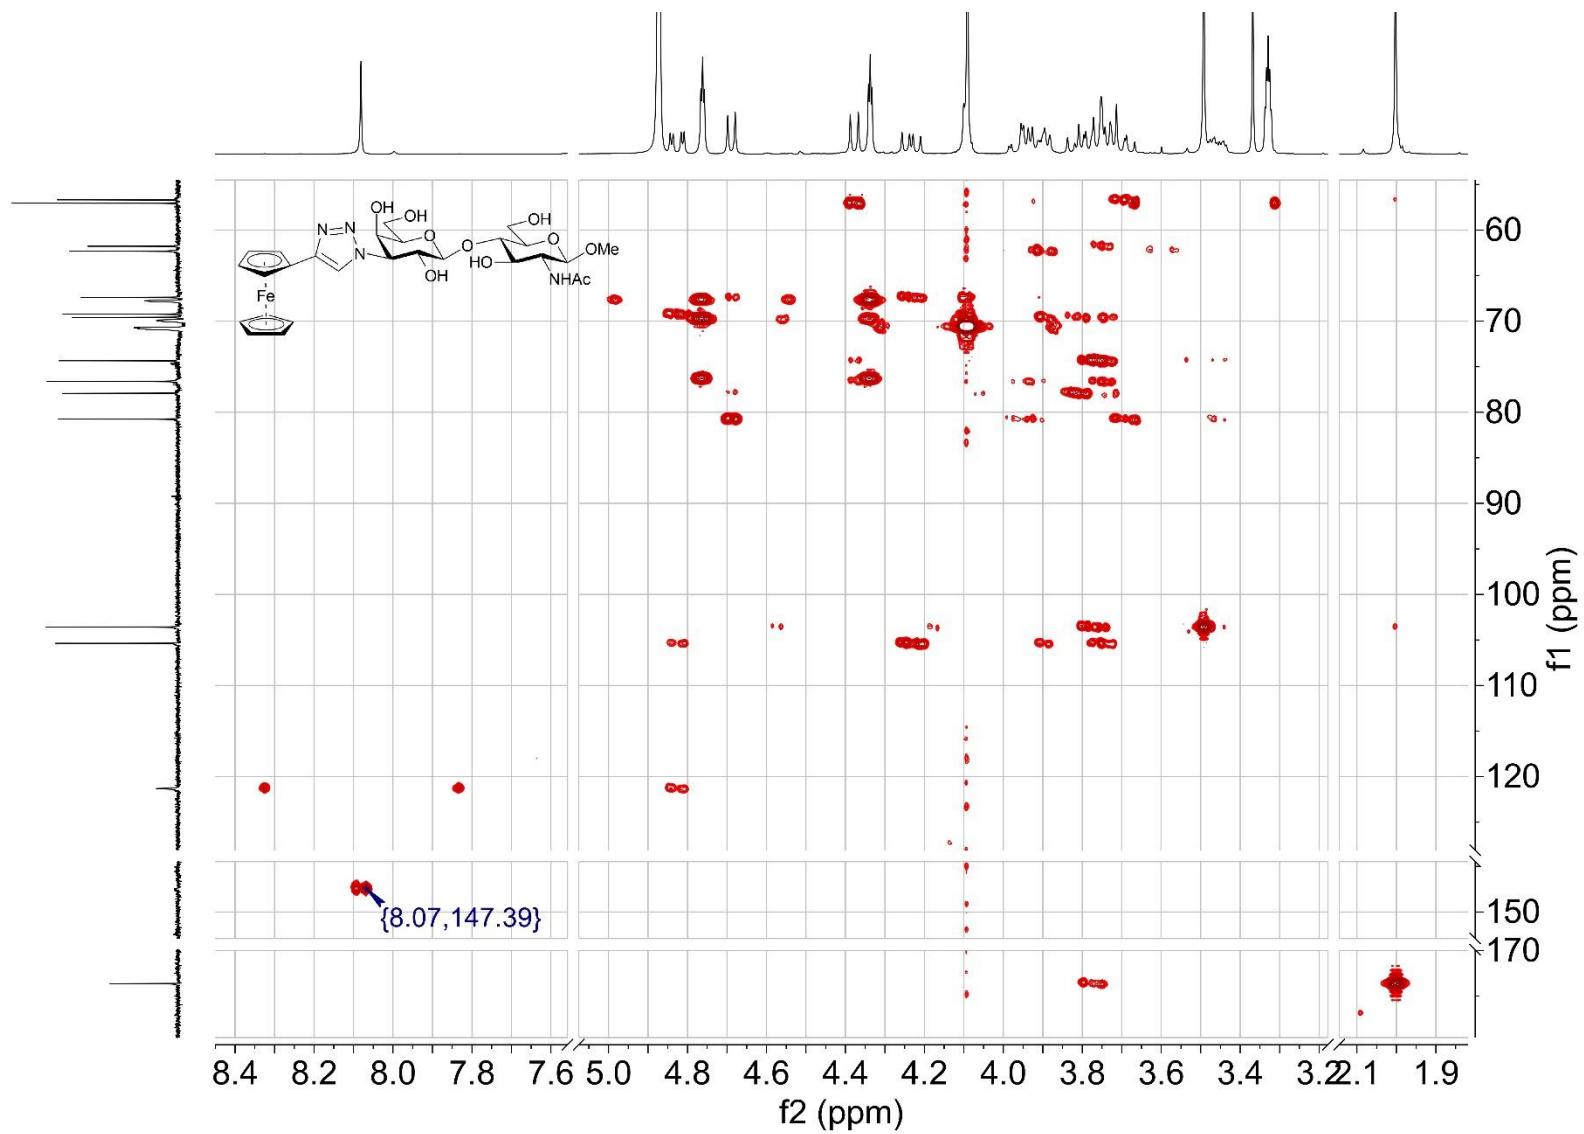



# NMR COMPOUND 26

## <sup>1</sup>H NMR (400 MHz, MeOD) 26

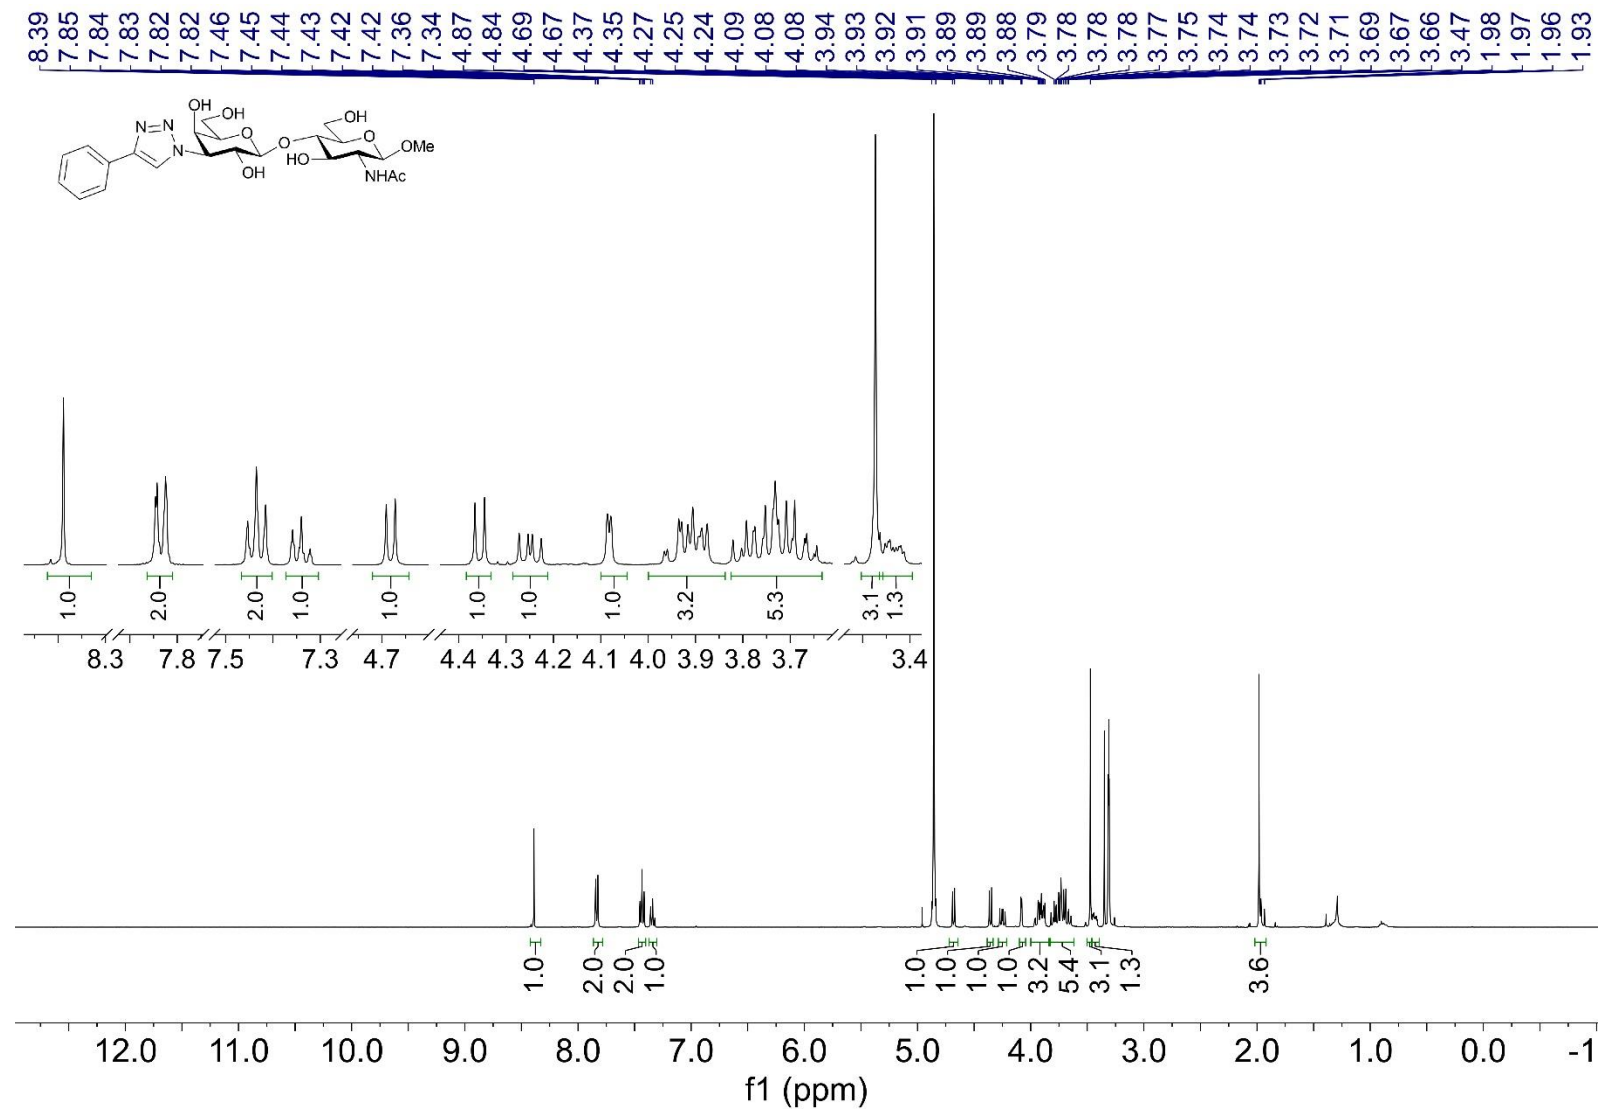

<sup>13</sup>C NMR (101 MHz, MeOD) 26

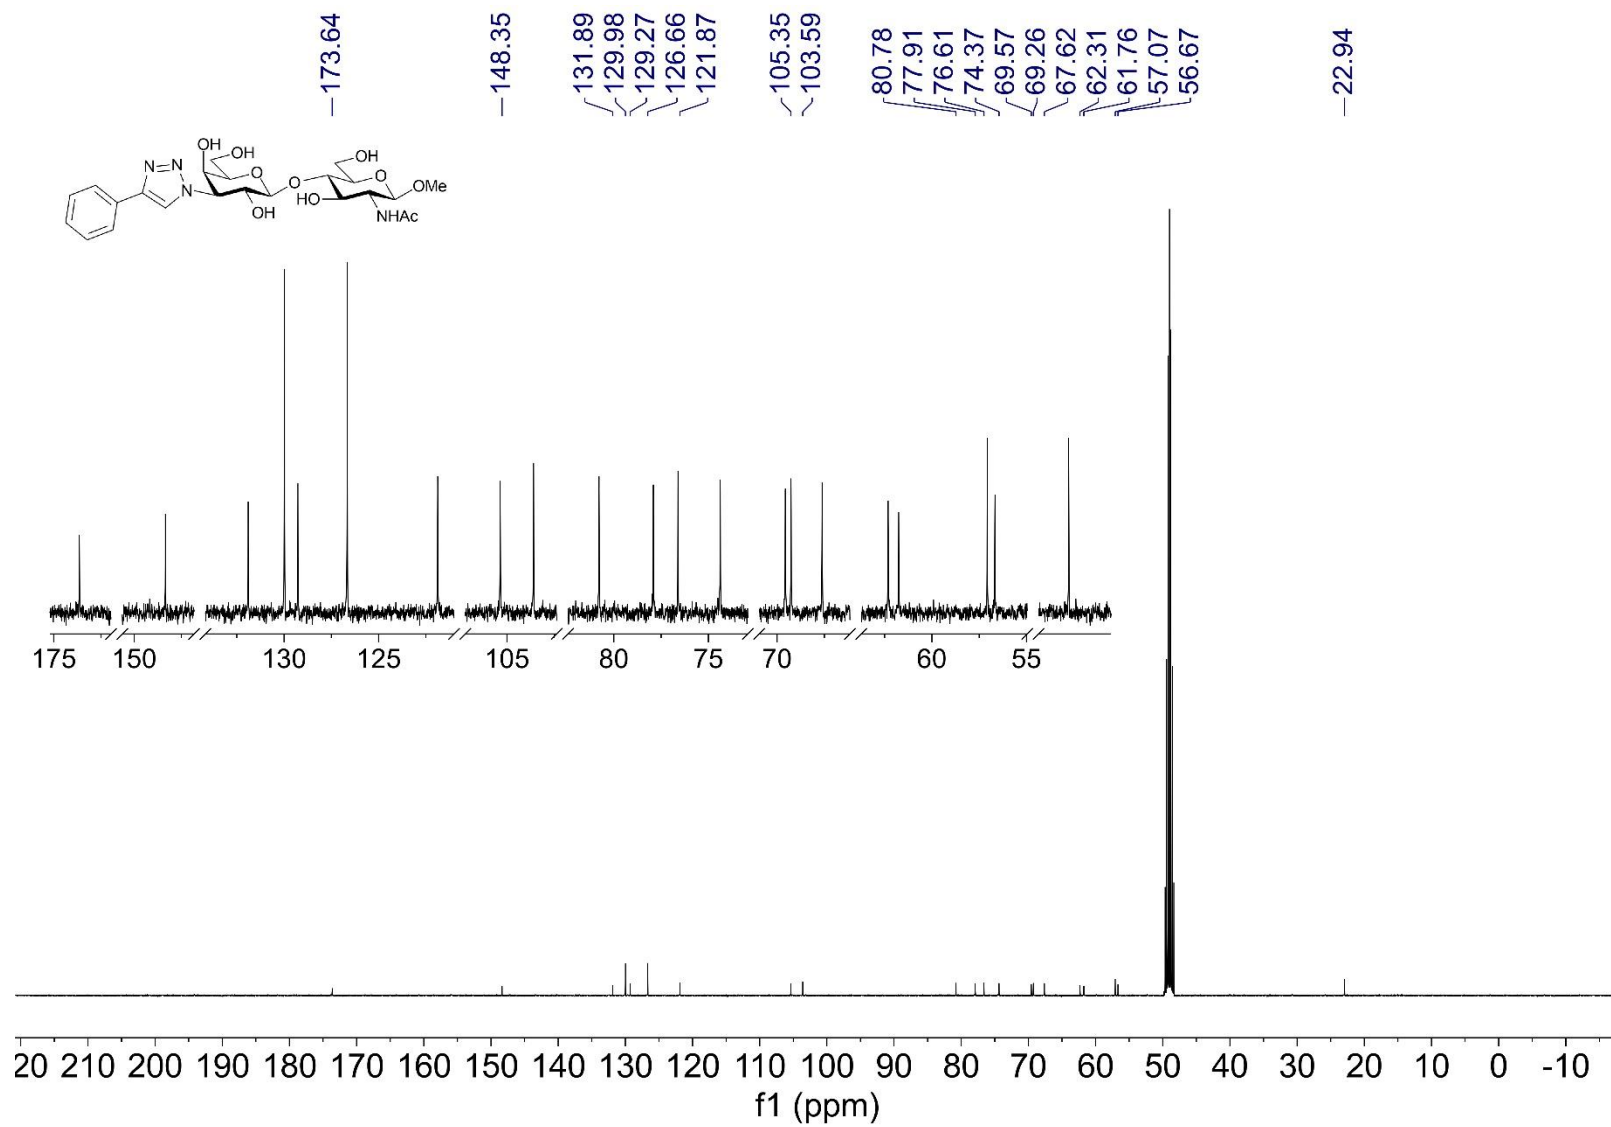

<sup>1</sup>H-<sup>1</sup>H COSY 26

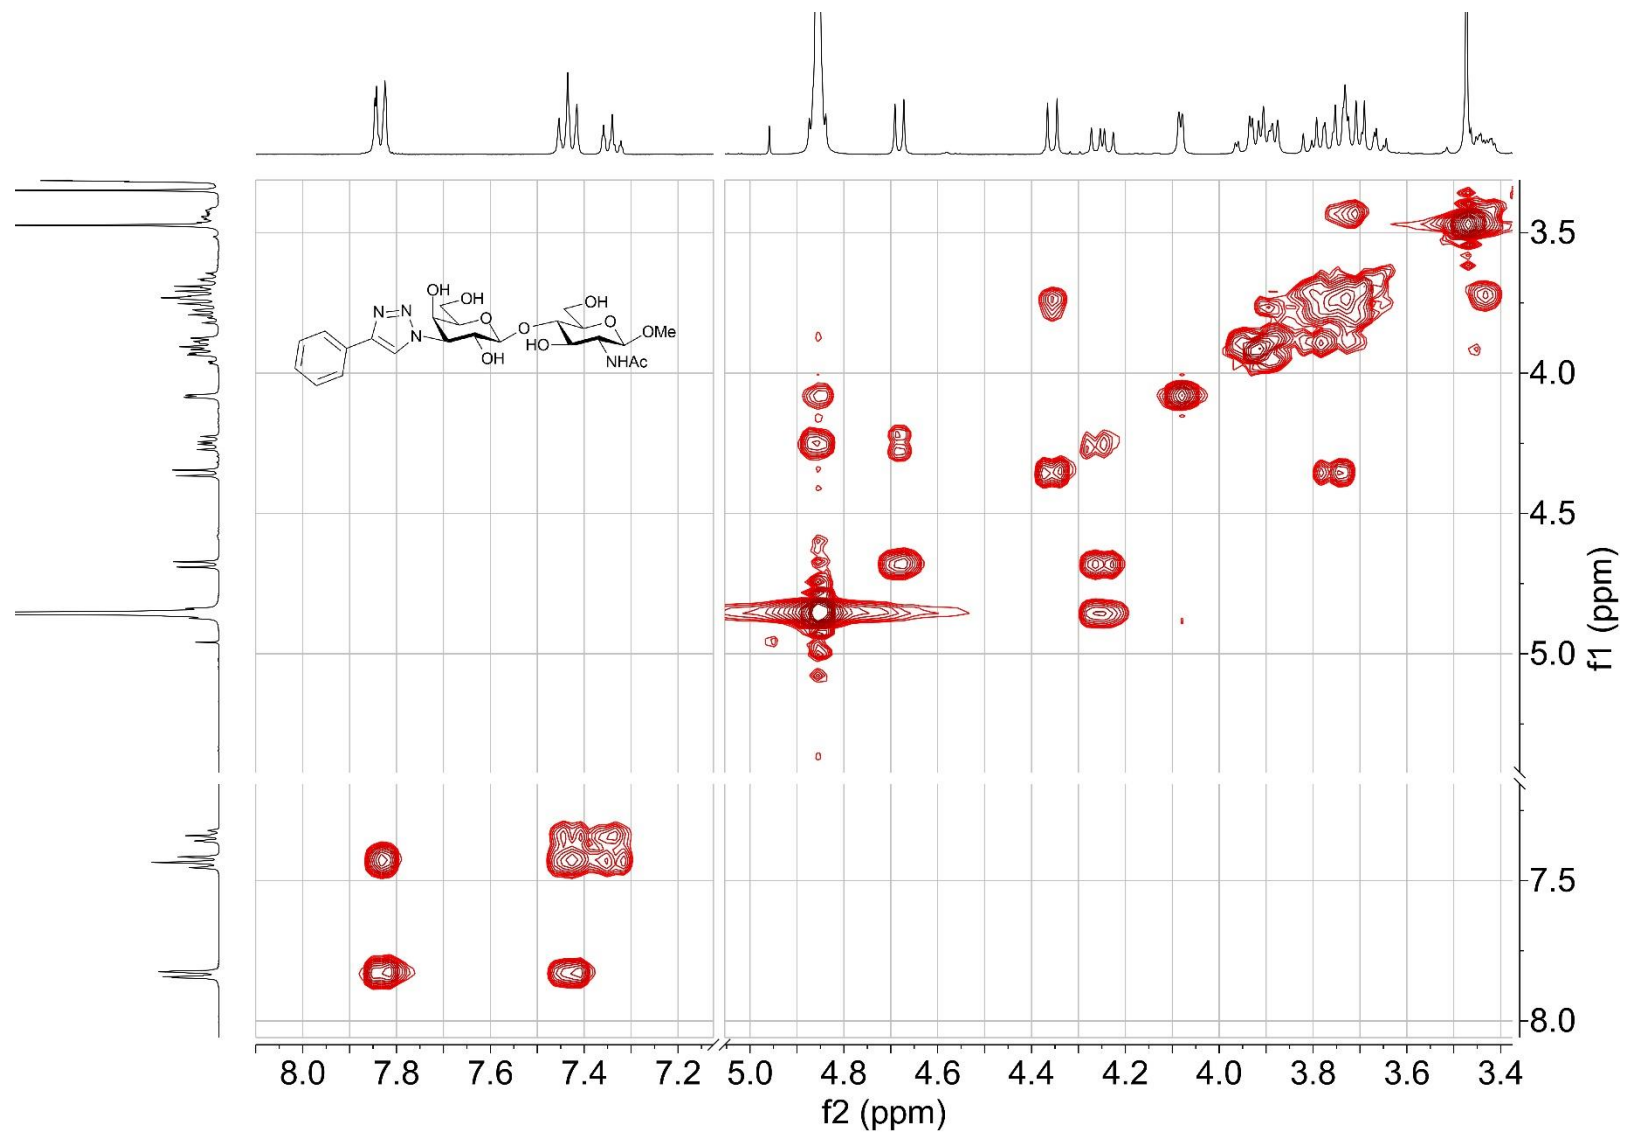

$^1\text{H}$ - $^{13}\text{C}$  HSQC 26

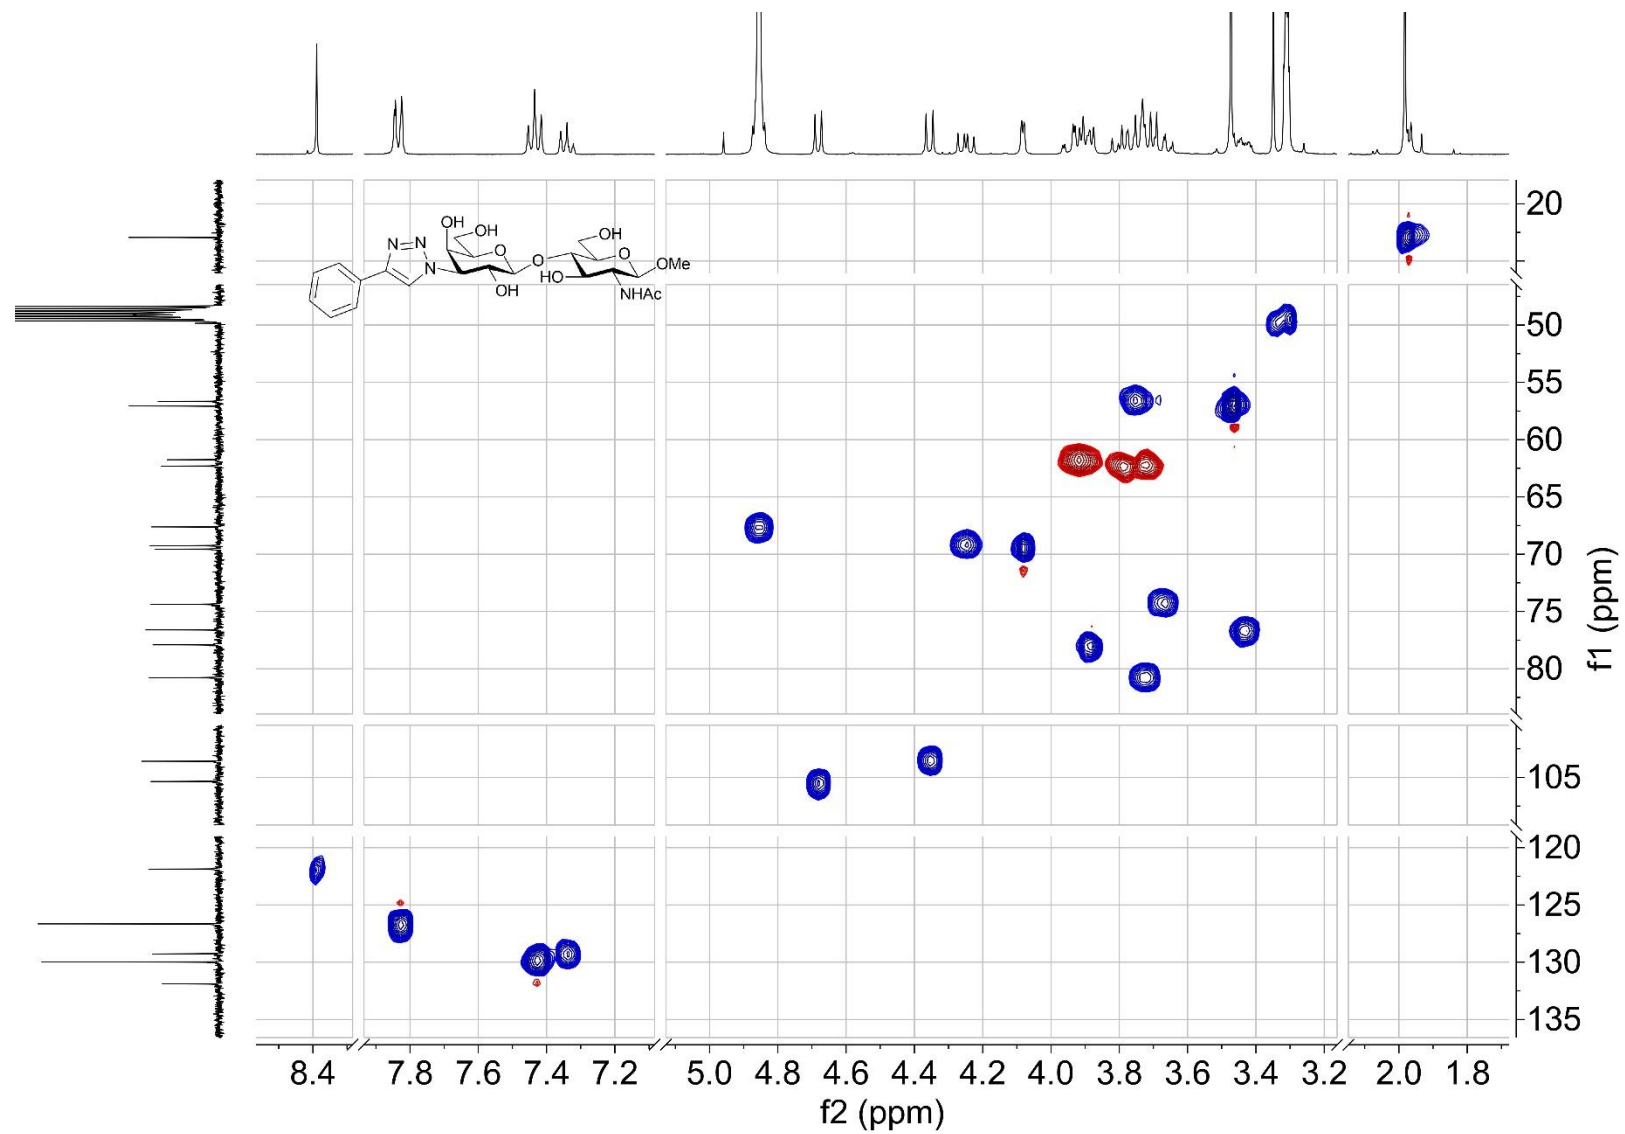

$^1\text{H}$ - $^{13}\text{C}$  HMBC 26

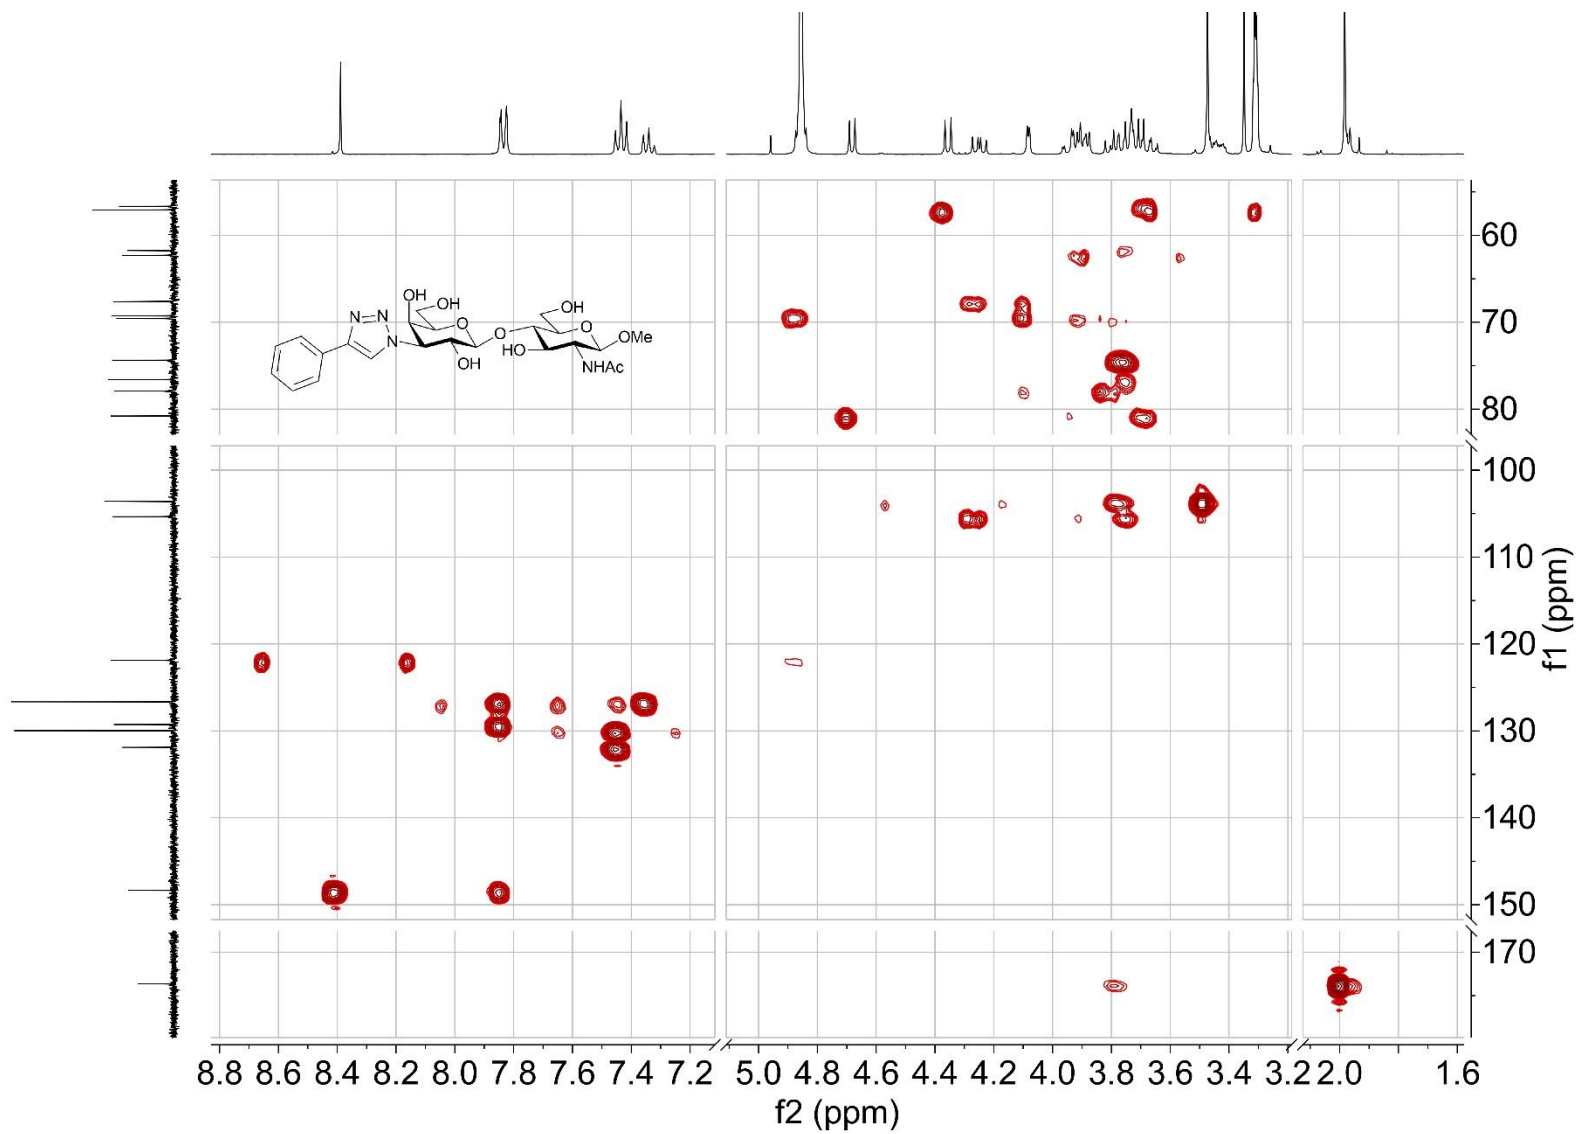

$^1\text{H}$ - $^{13}\text{C}$  HSQCTOCSY 26

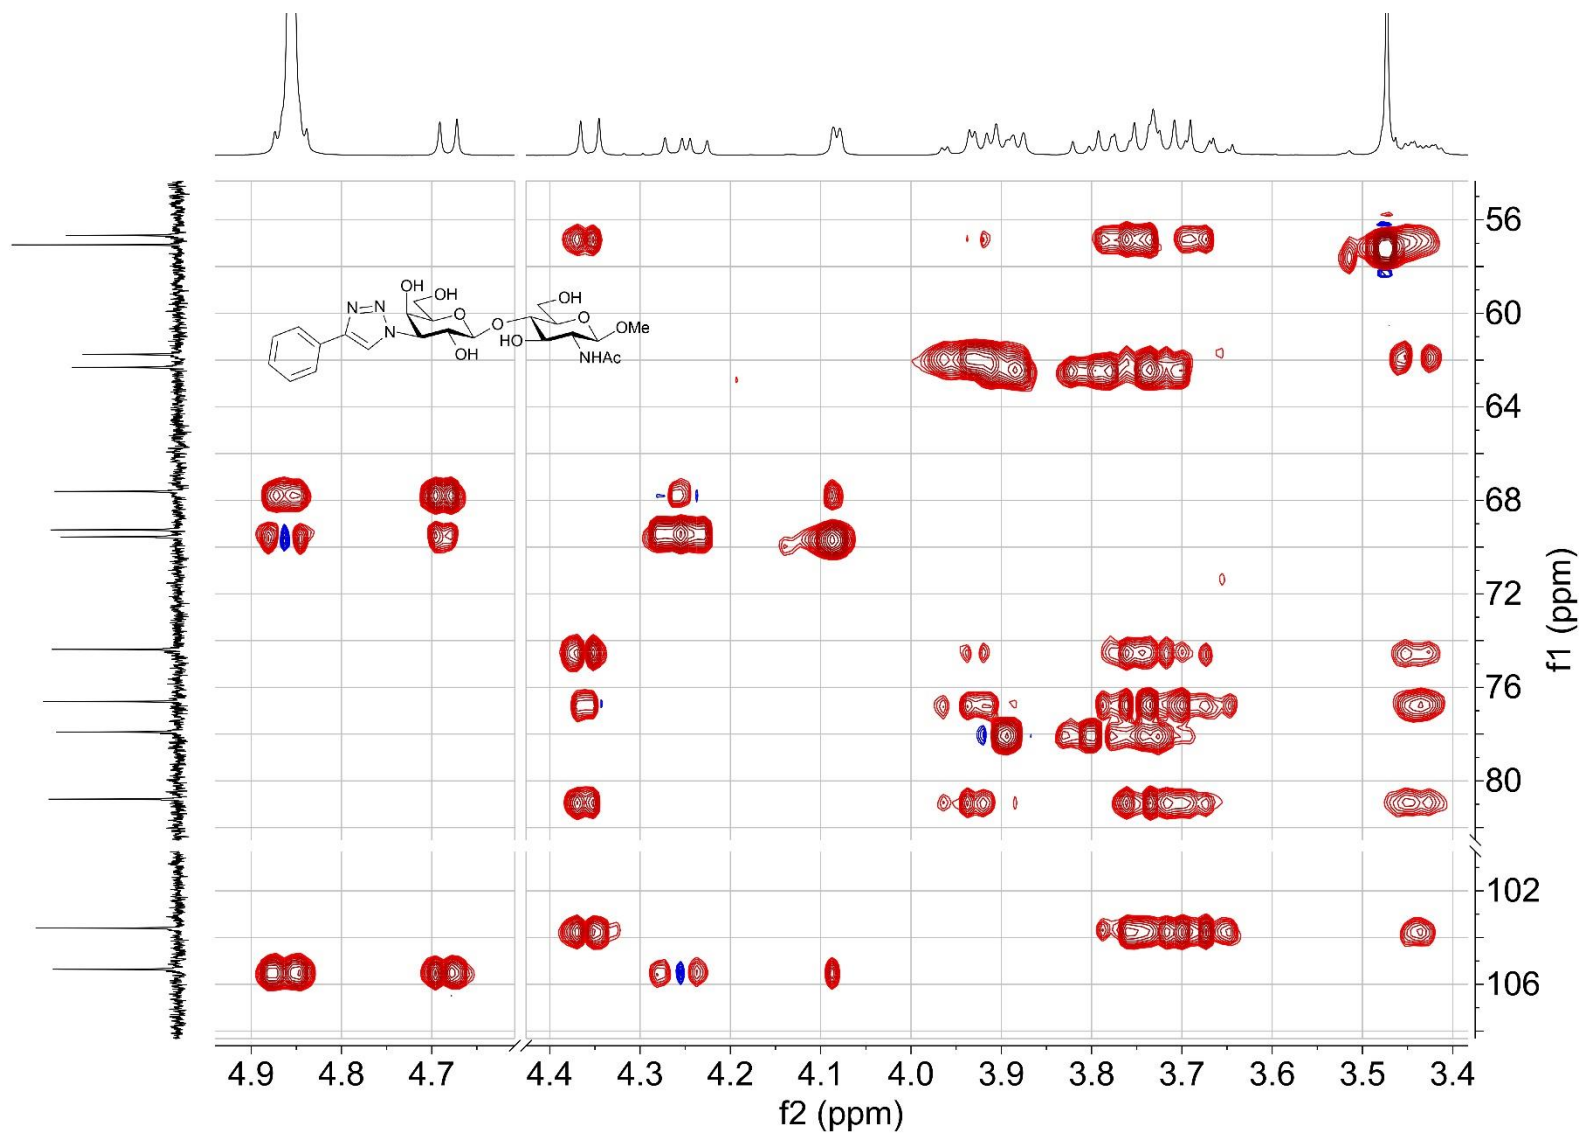

# NMR COMPOUND 27

## <sup>1</sup>H NMR (400 MHz, MeOD) 27

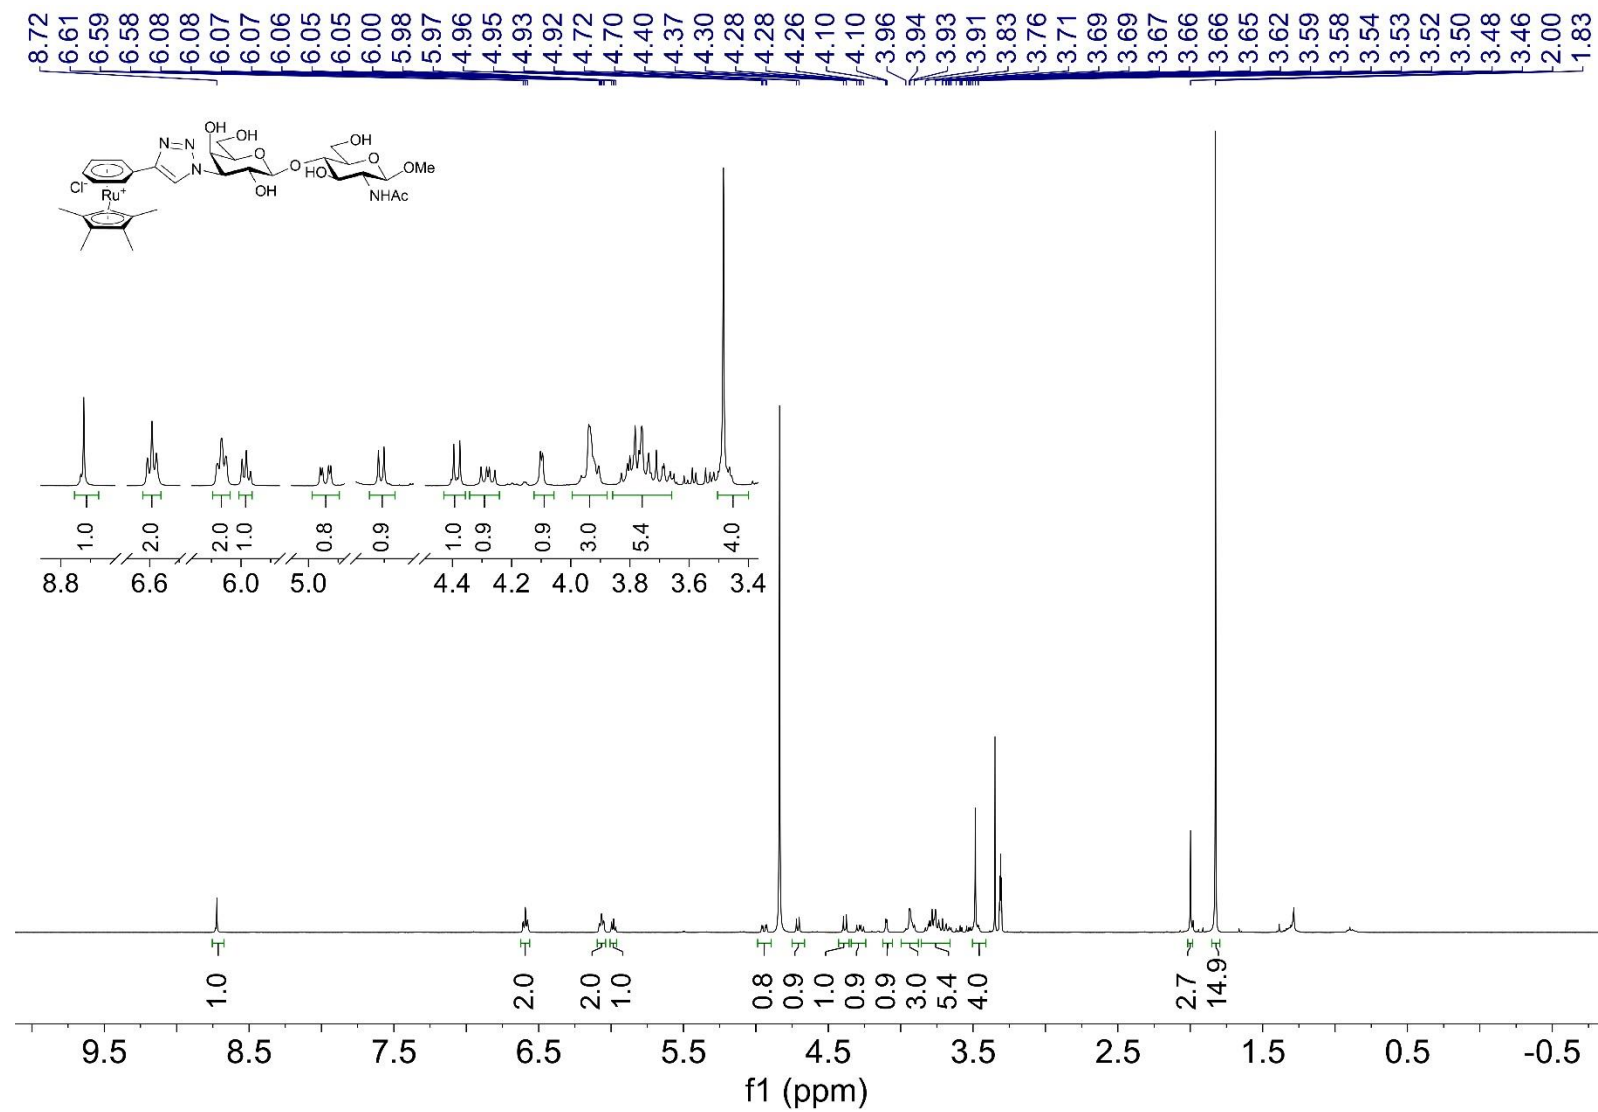

<sup>13</sup>C NMR (101 MHz, MeOD) 27

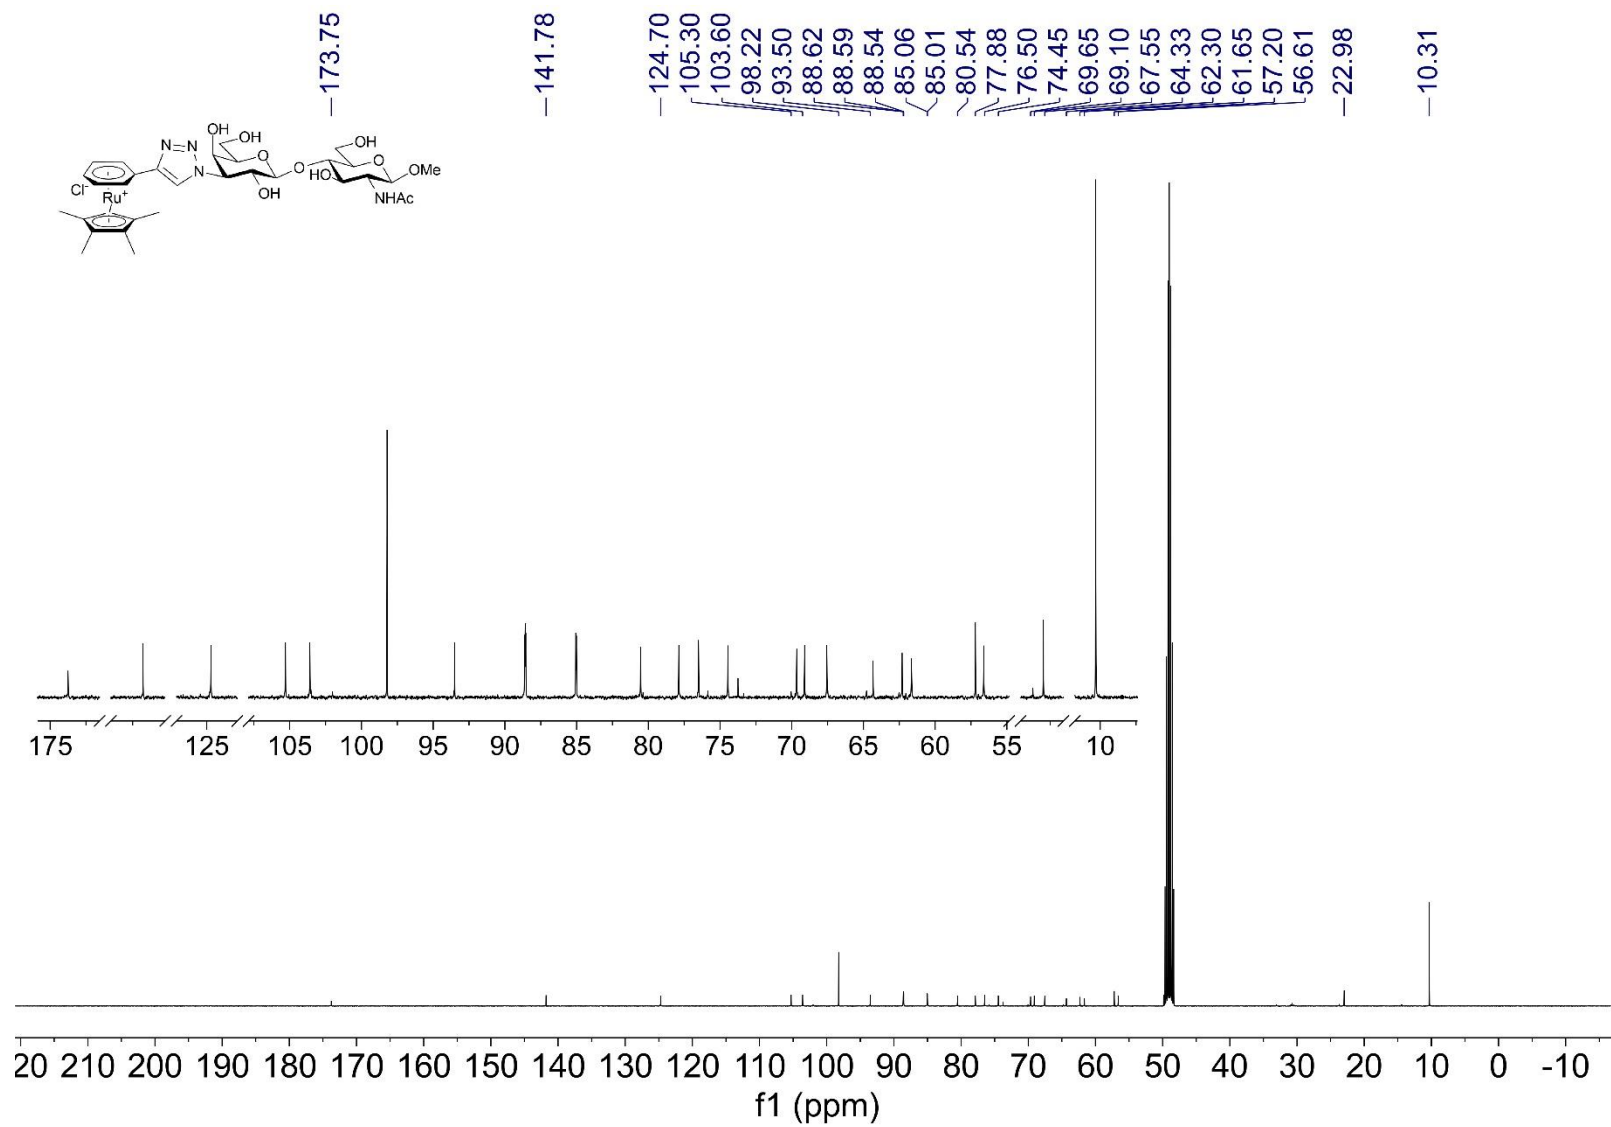



<sup>1</sup>H-<sup>1</sup>H COSY 27

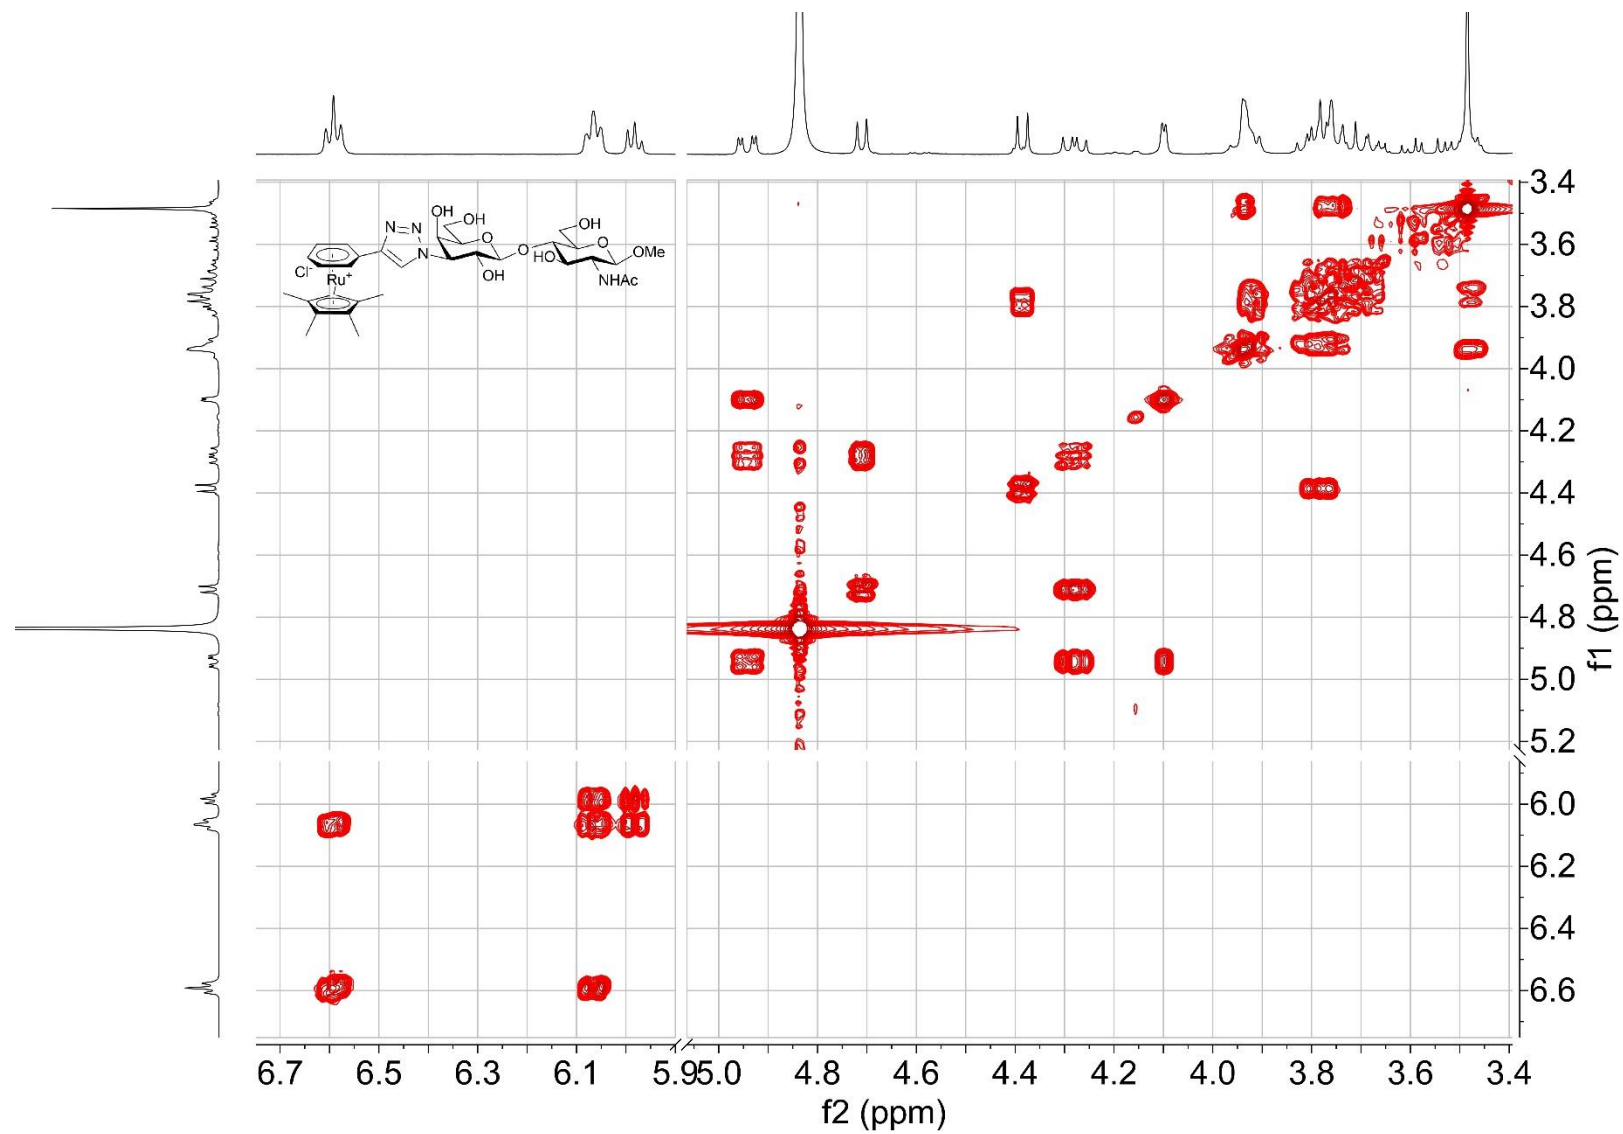

$^1\text{H}$ - $^{13}\text{C}$  HSQC 27

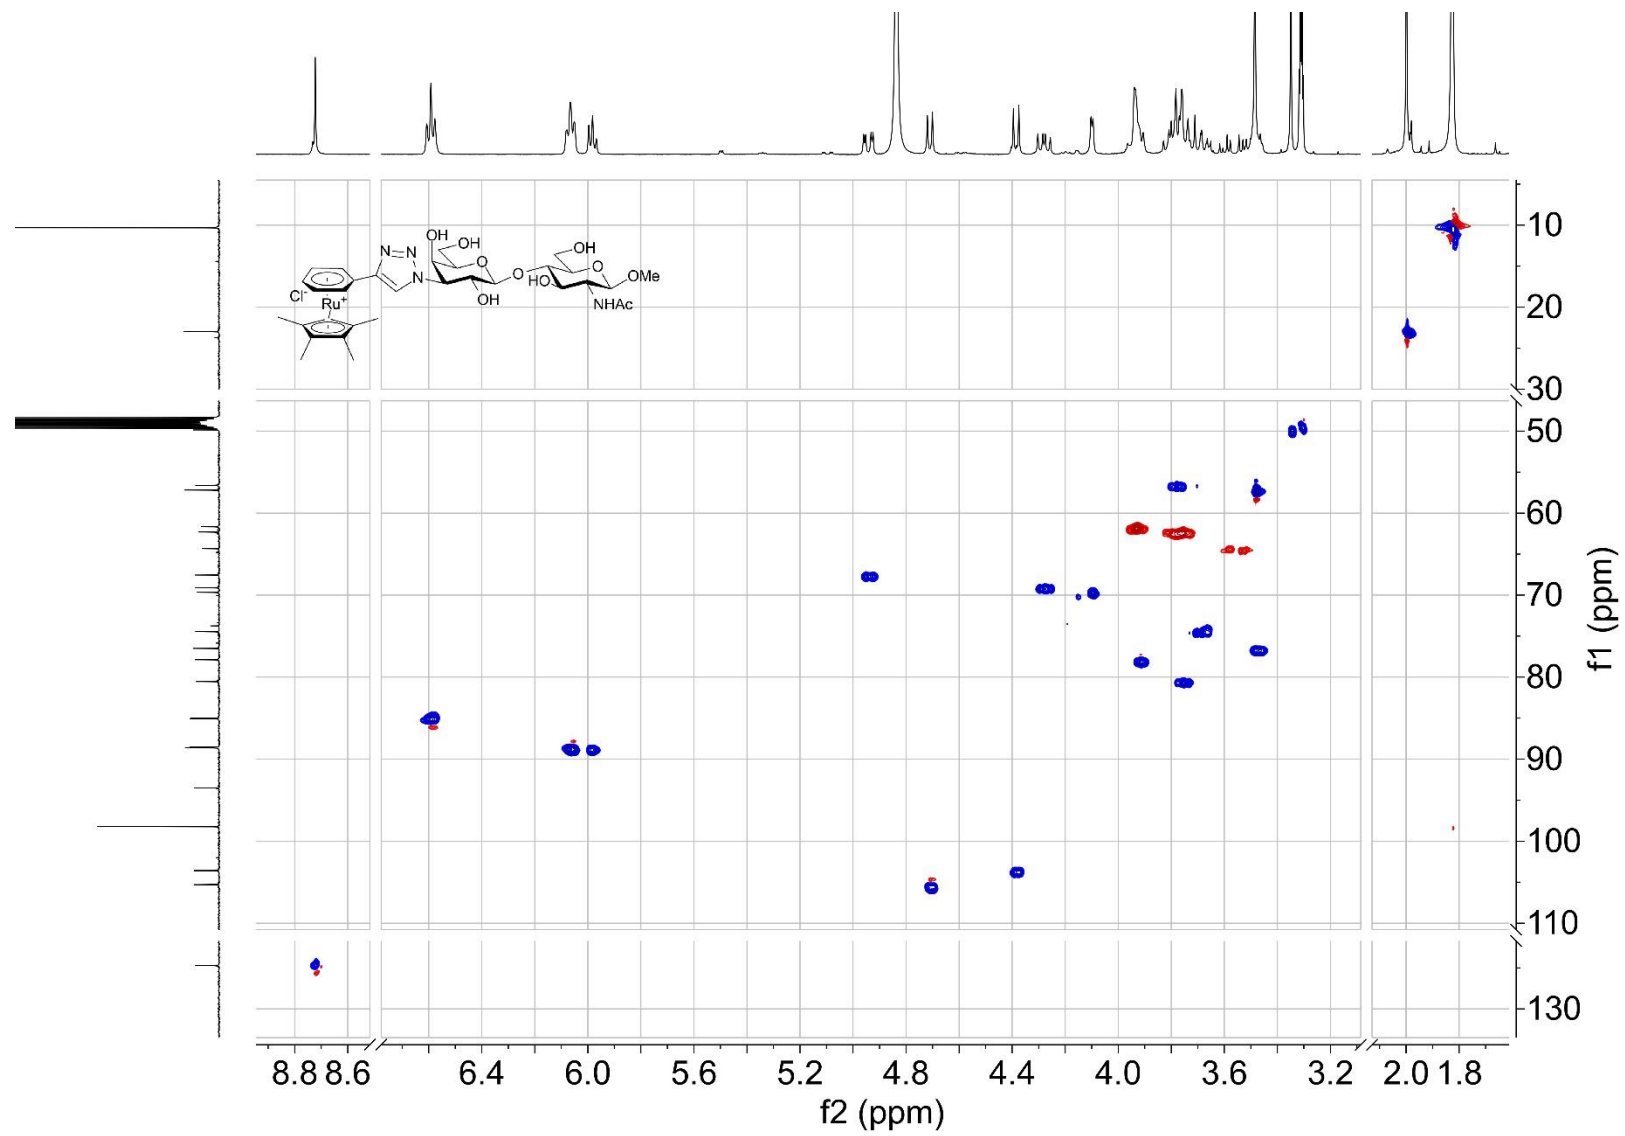

$^1\text{H}$ - $^{13}\text{C}$  HMBC 27

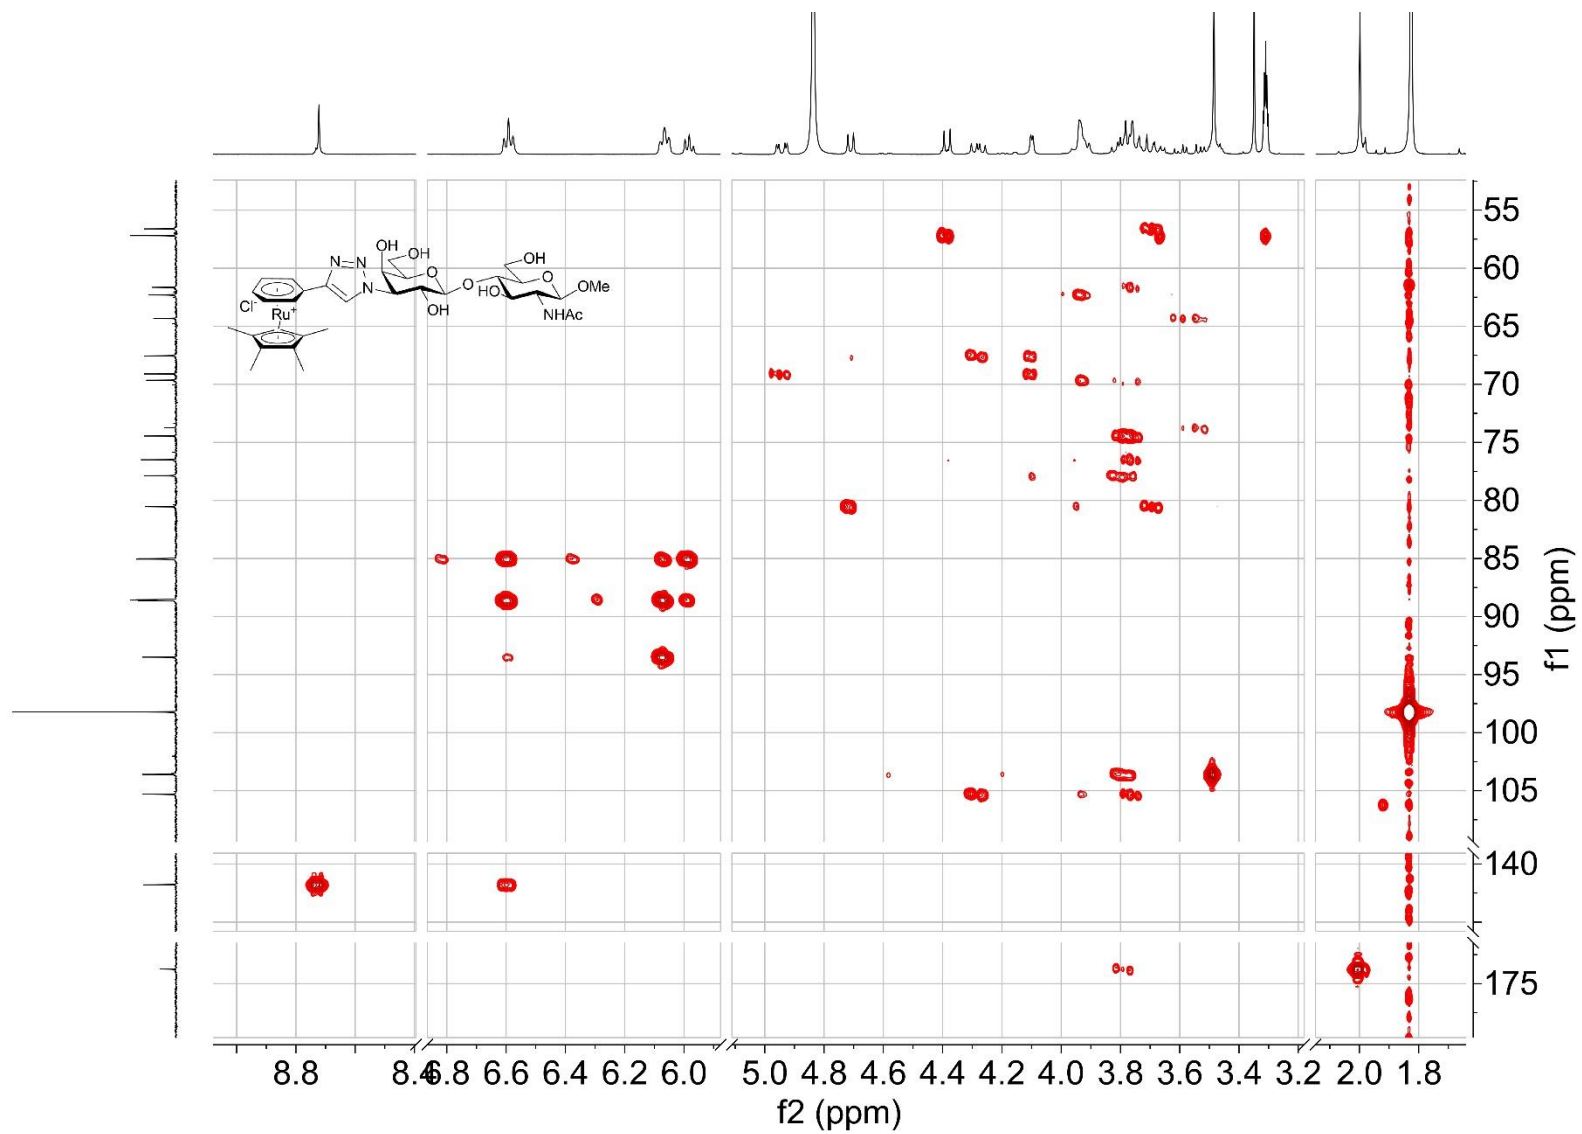

$^1\text{H}$ - $^{13}\text{C}$  HSQCTOCSY 27

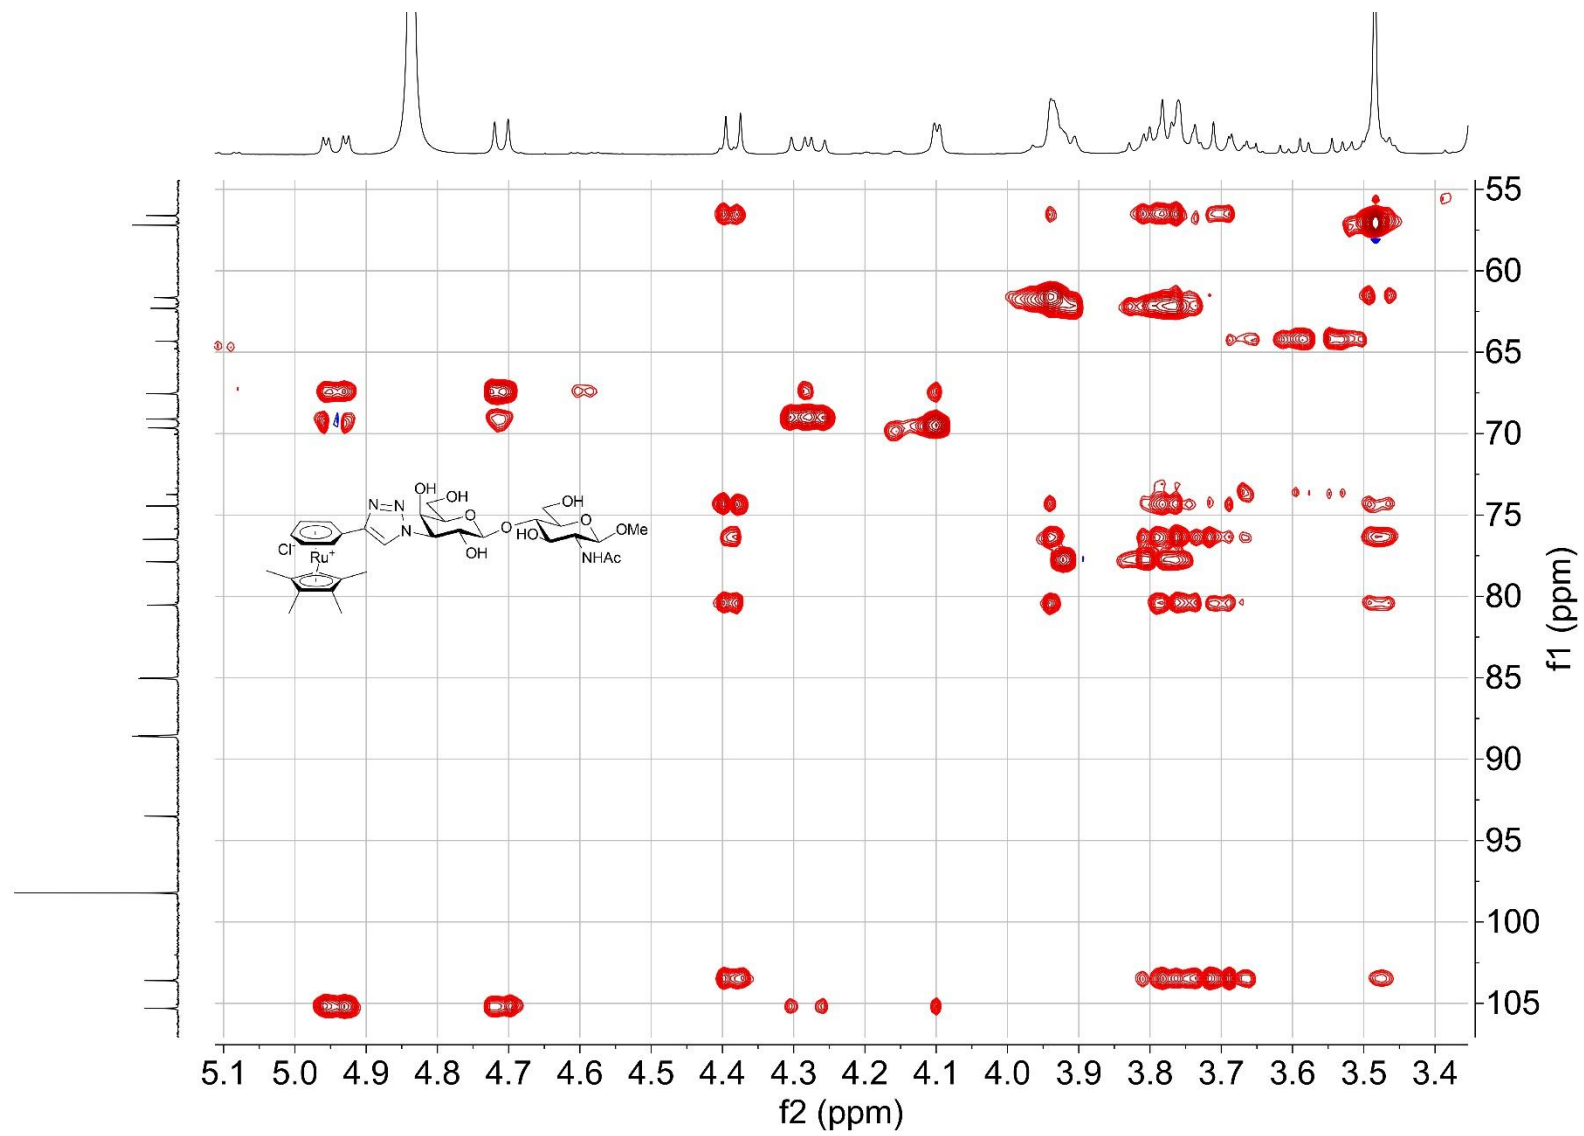

# NMR COMPOUND 28

## <sup>1</sup>H NMR (400 MHz, MeOD) 28

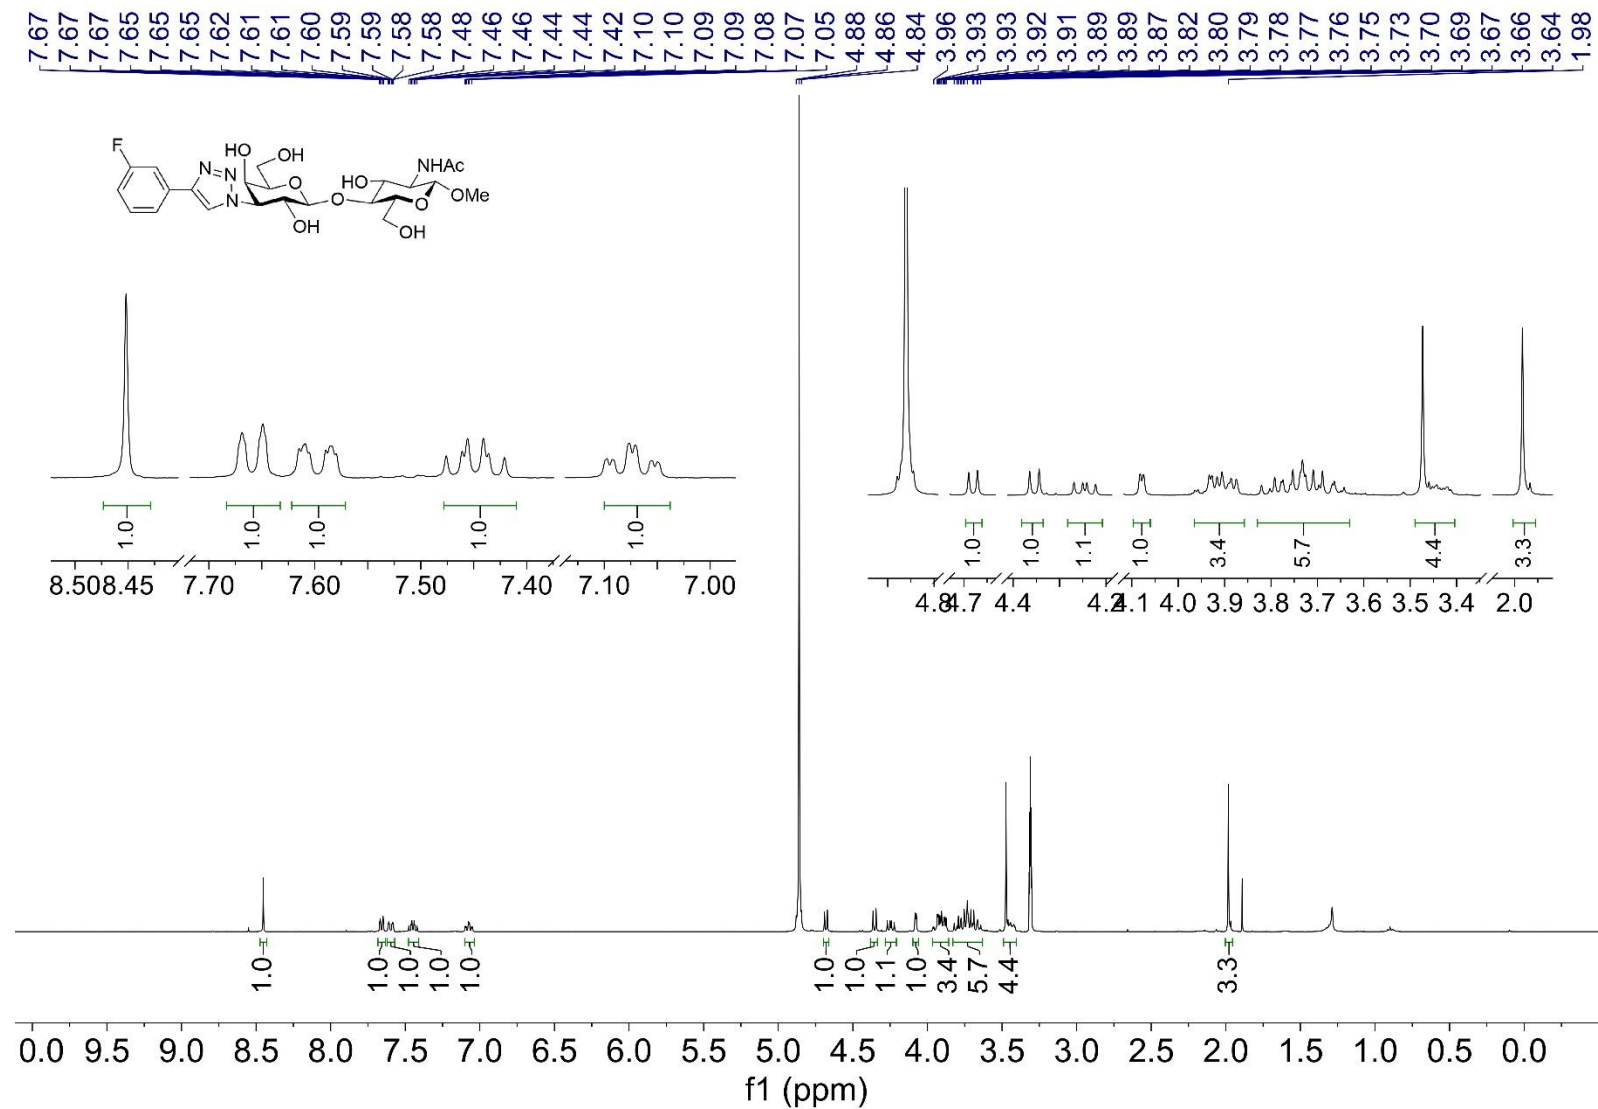

<sup>13</sup>C NMR (101 MHz, MeOD) 28

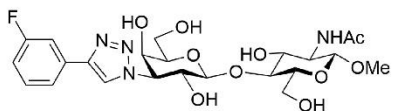

- 173.63
- 165.87
- 163.45
- 147.20
- 147.17
- 134.35
- 134.27
- 131.90
- 131.82
- 122.44
- 115.87
- 115.66
- 113.34
- 113.11
- 105.35
- 103.58
- 80.77
- 77.88
- 76.59
- 74.36
- 69.54
- 69.23
- 67.68
- 62.29
- 61.75
- 57.06
- 56.67
- 22.94

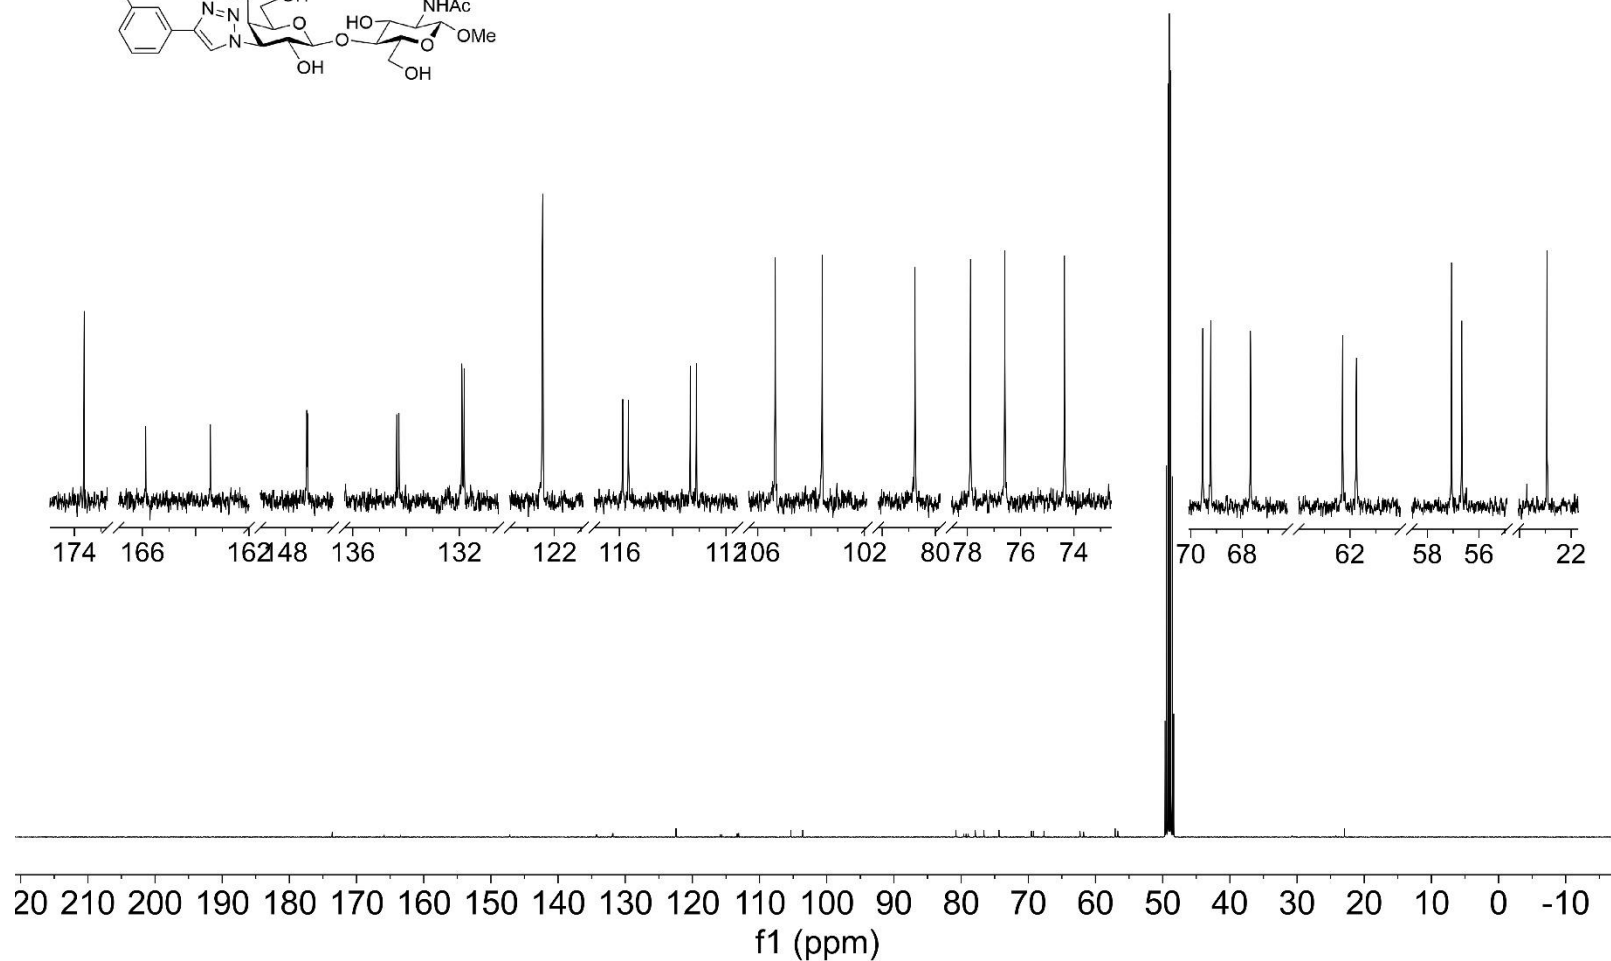

**<sup>19</sup>F NMR (376 MHz, MeOD) 28**

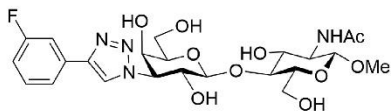

-116.05  
-116.07  
-116.08  
-116.09  
-116.10  
-116.12

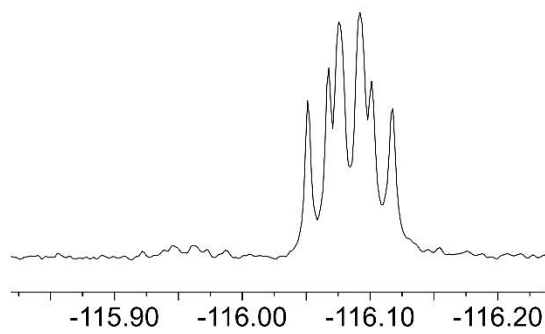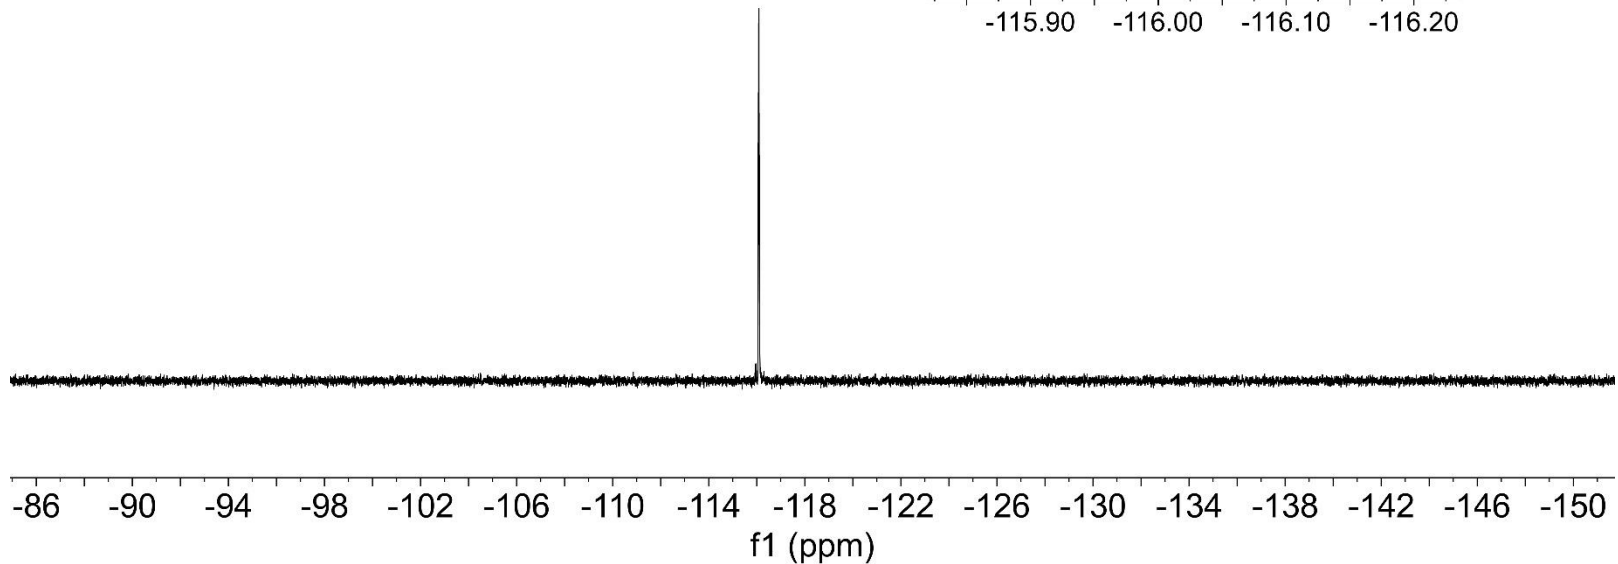

**<sup>1</sup>H-<sup>1</sup>H COSY 28**

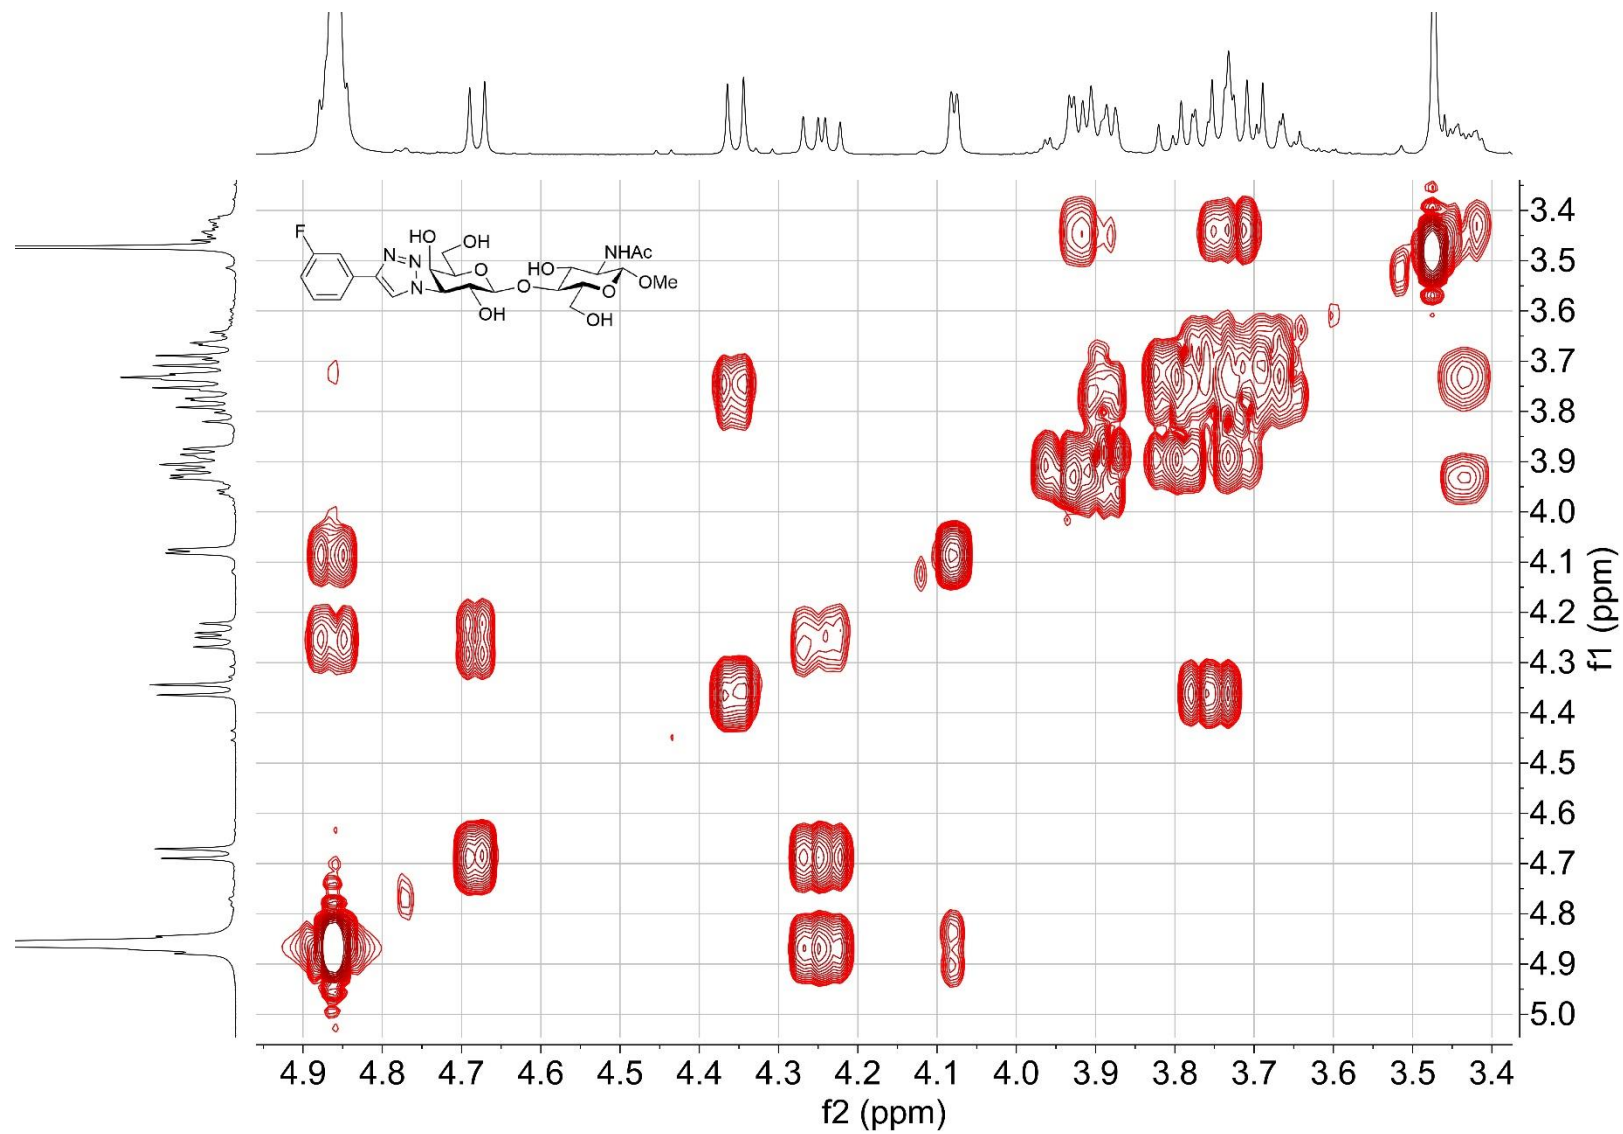



$^1\text{H}$ - $^{13}\text{C}$  HSQC 28

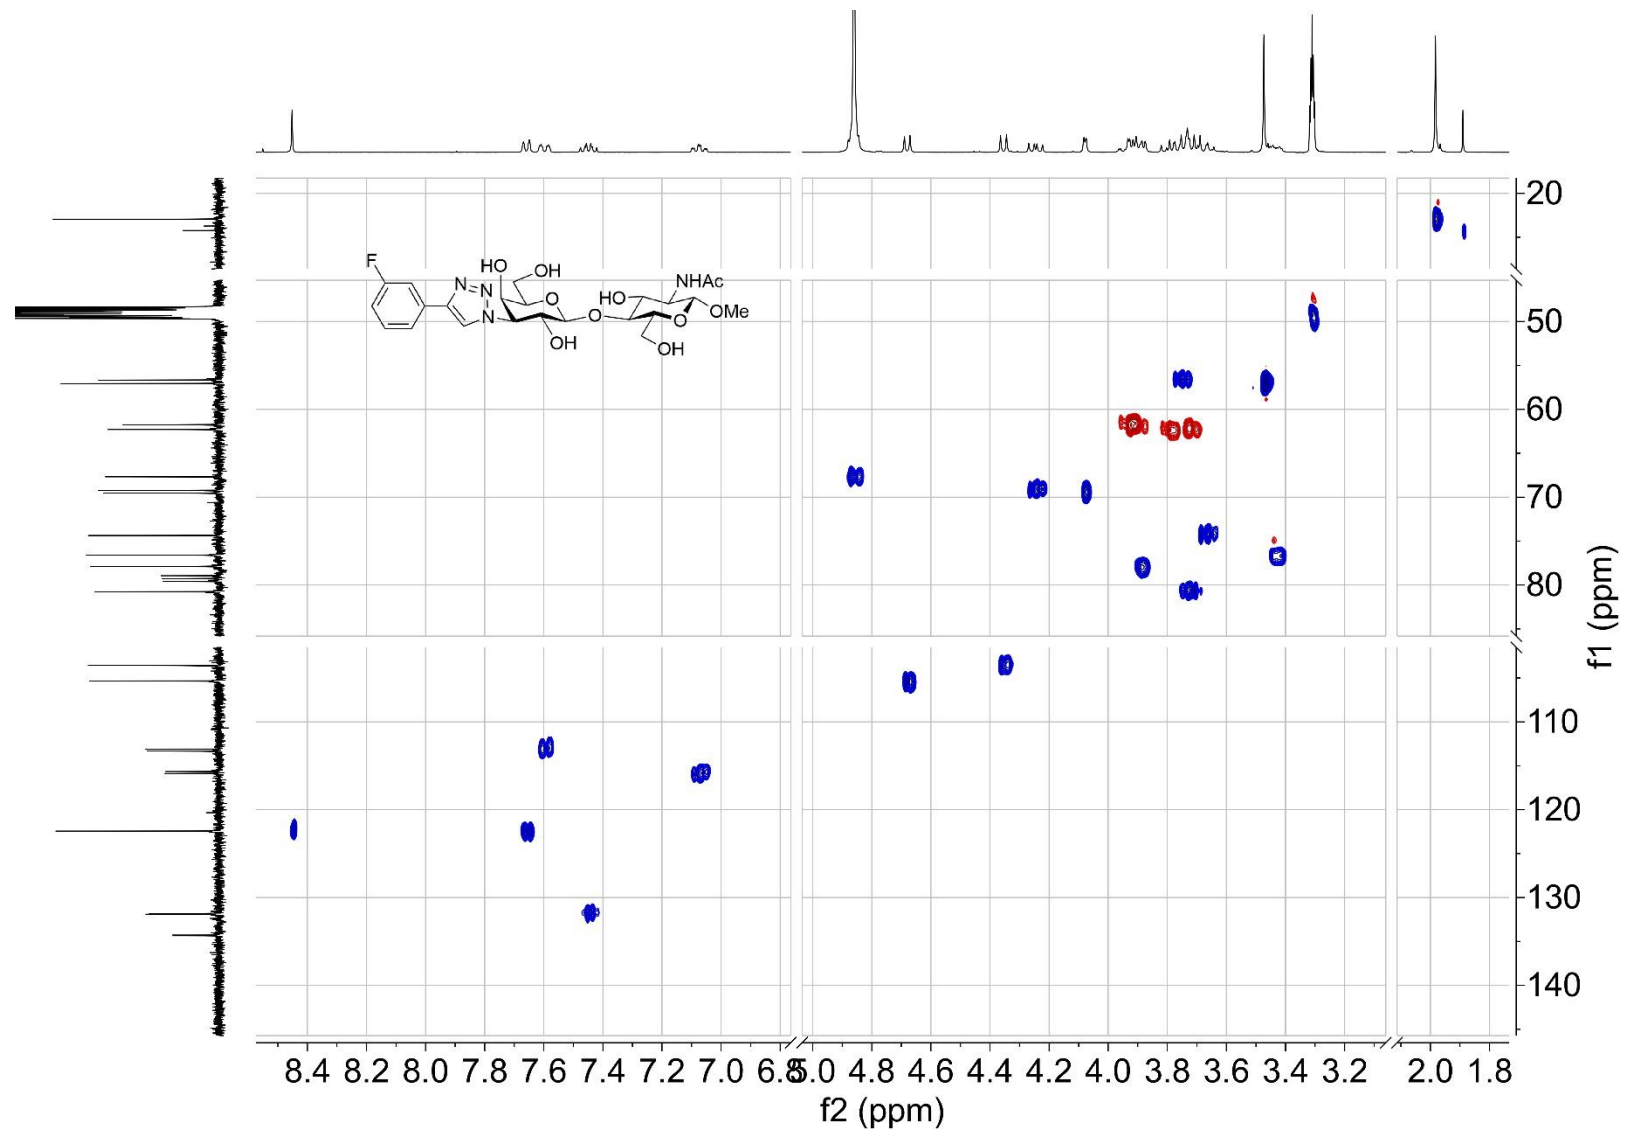

$^1\text{H}$ - $^{13}\text{C}$  HMBC 28

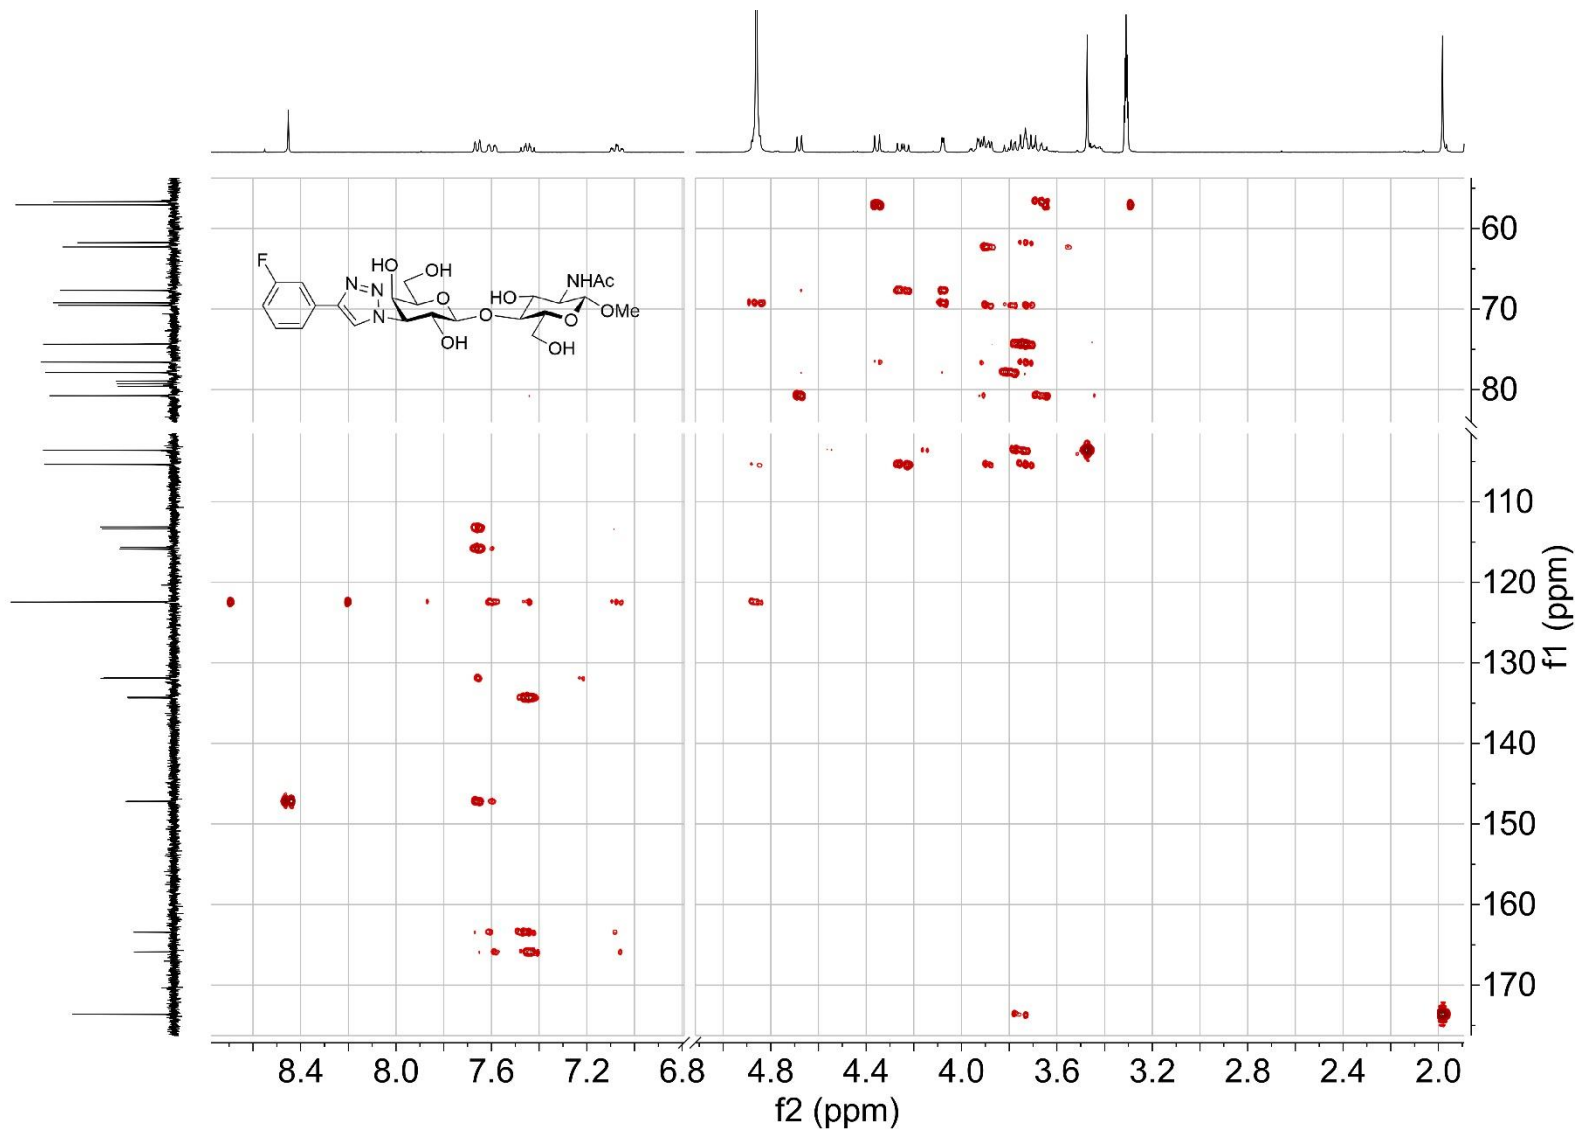

$^1\text{H}$ - $^{13}\text{C}$  HSQCTOCSY 28

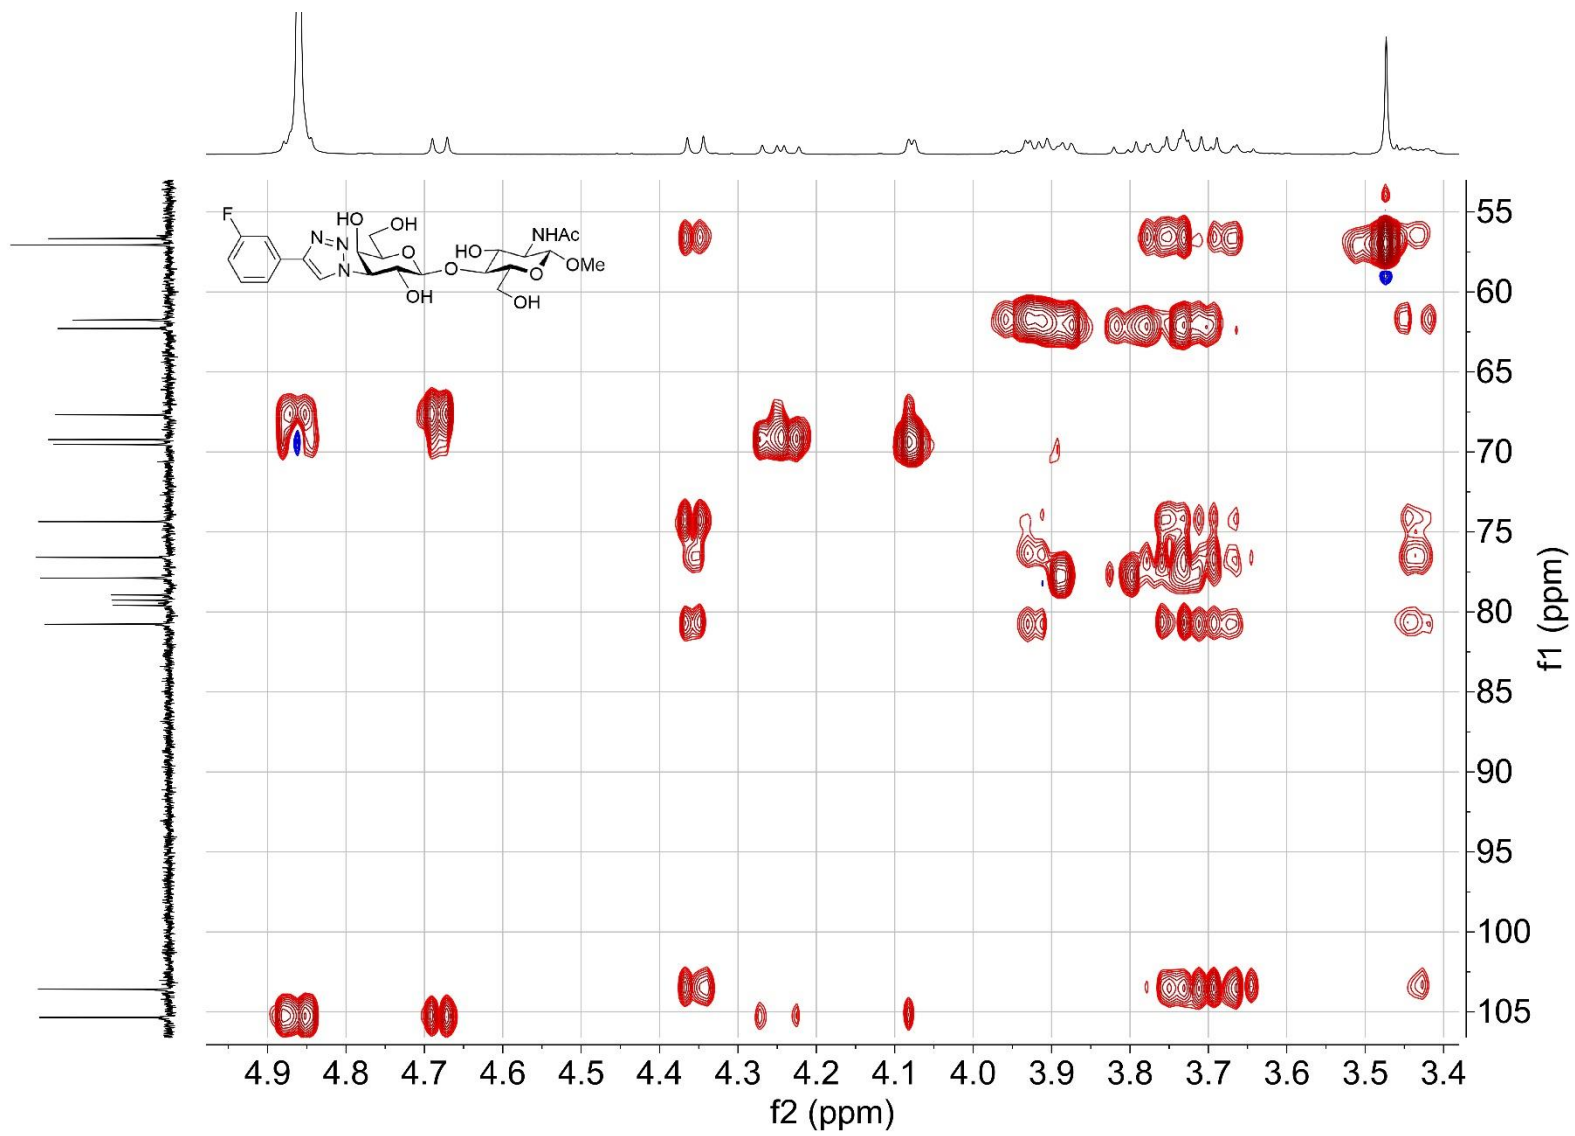

# NMR COMPOUND 29

## <sup>1</sup>H NMR (400 MHz, MeOD) 29

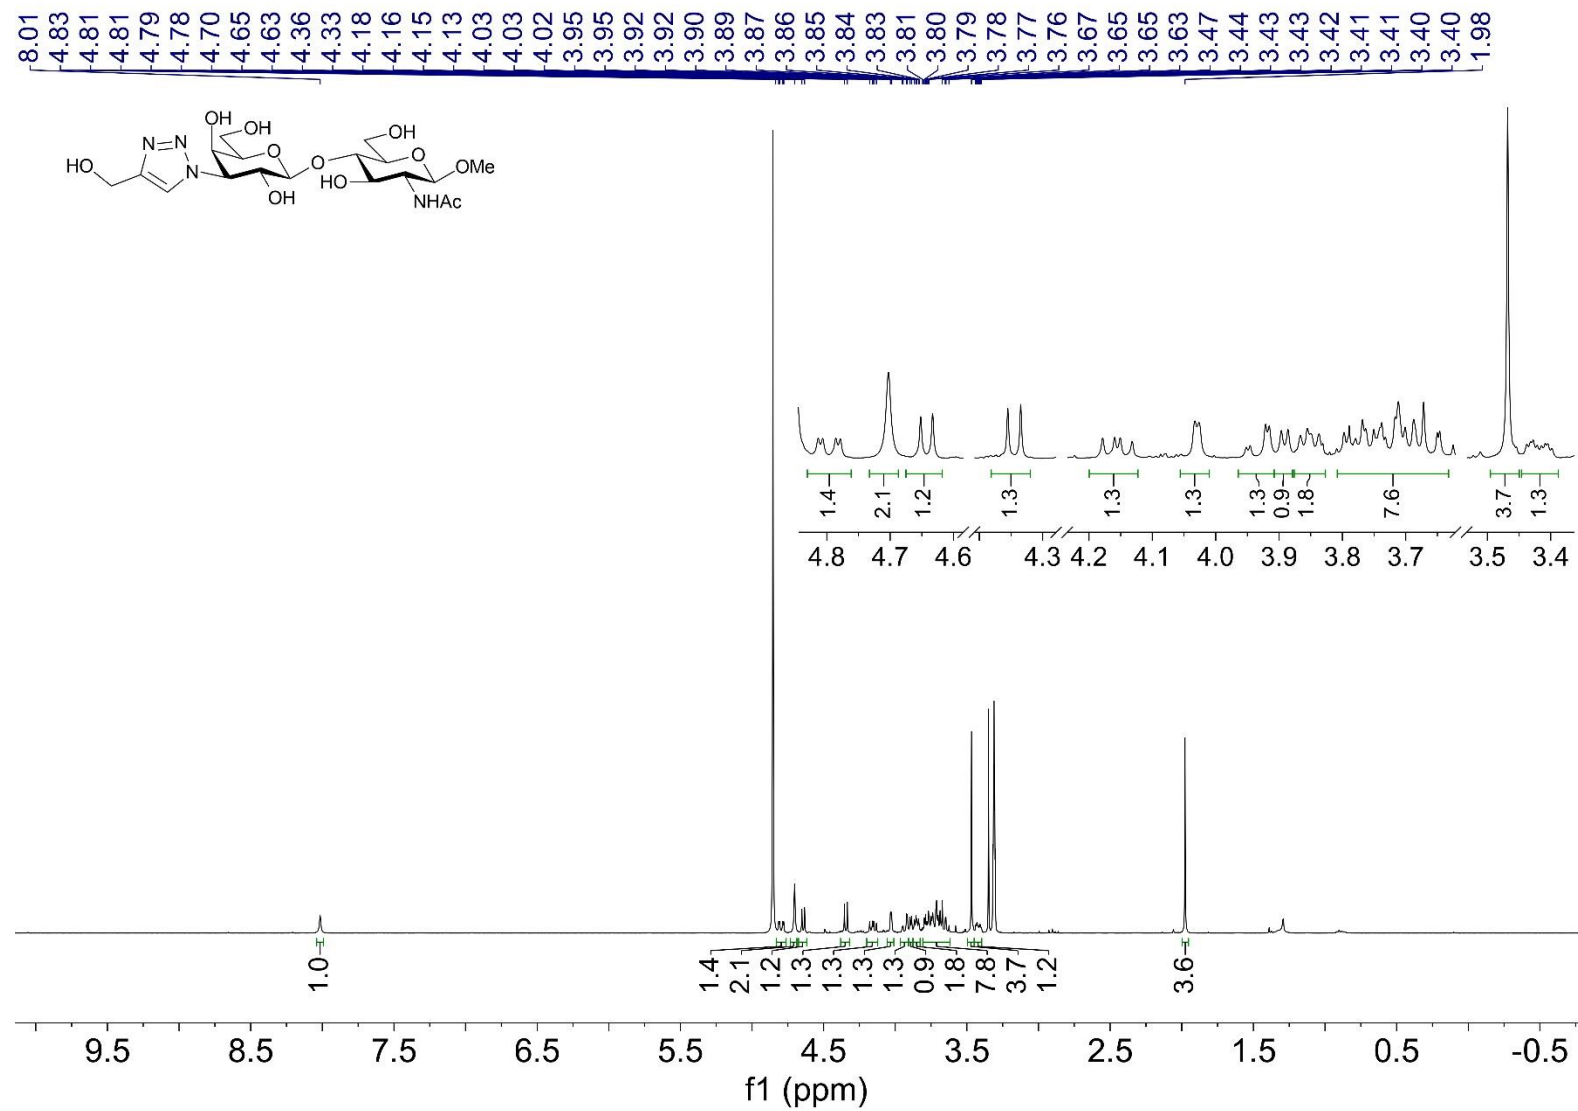

<sup>13</sup>C NMR (101 MHz, MeOD) 29

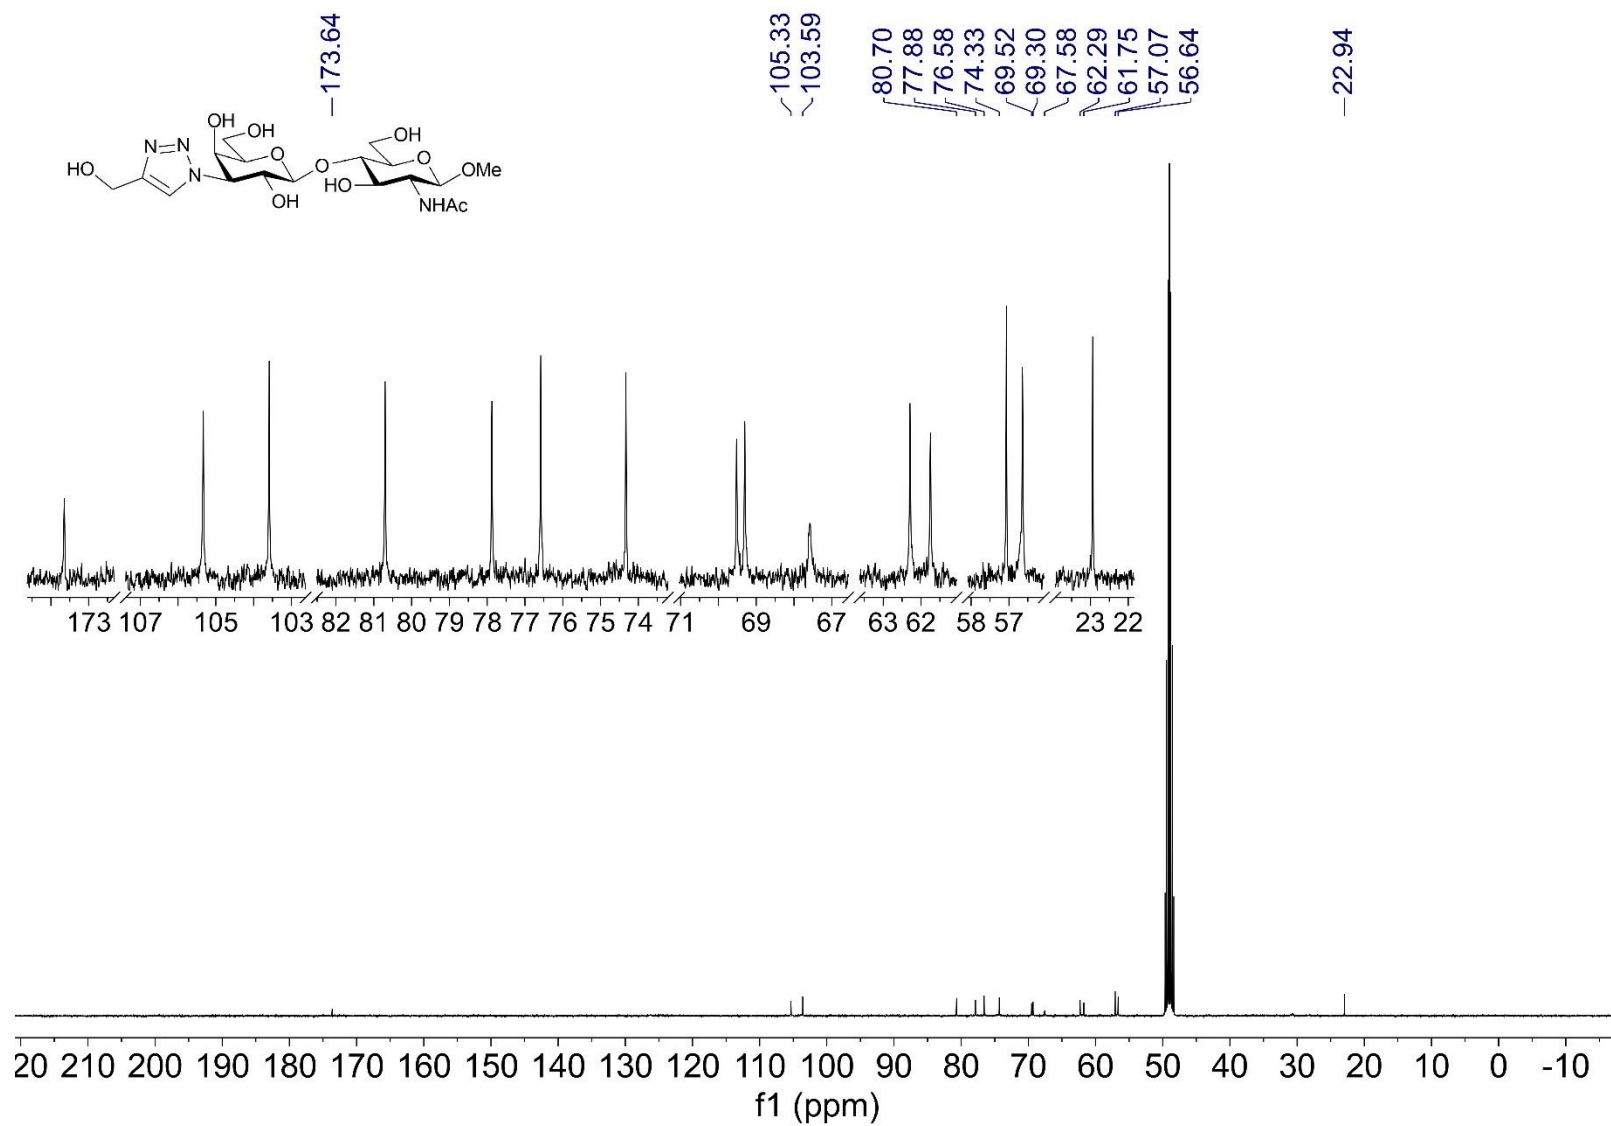

<sup>1</sup>H-<sup>1</sup>H COSY 29

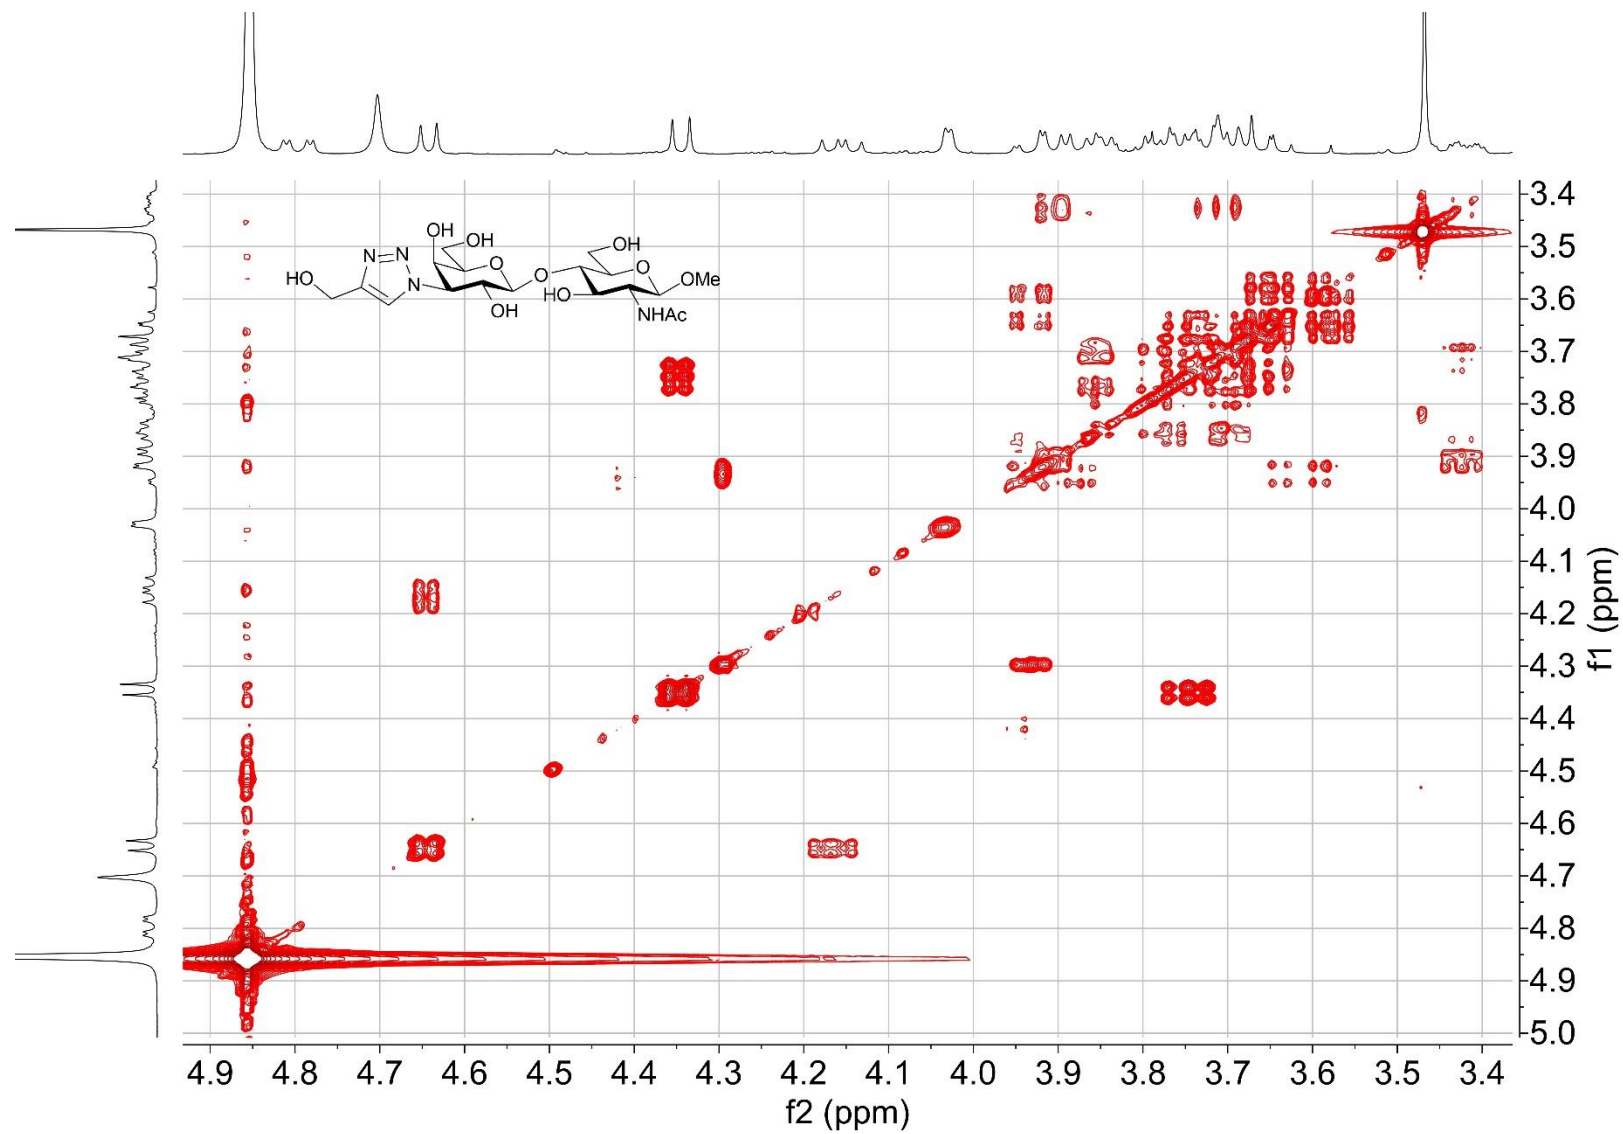

$^1\text{H}$ - $^{13}\text{C}$  HSQC 29

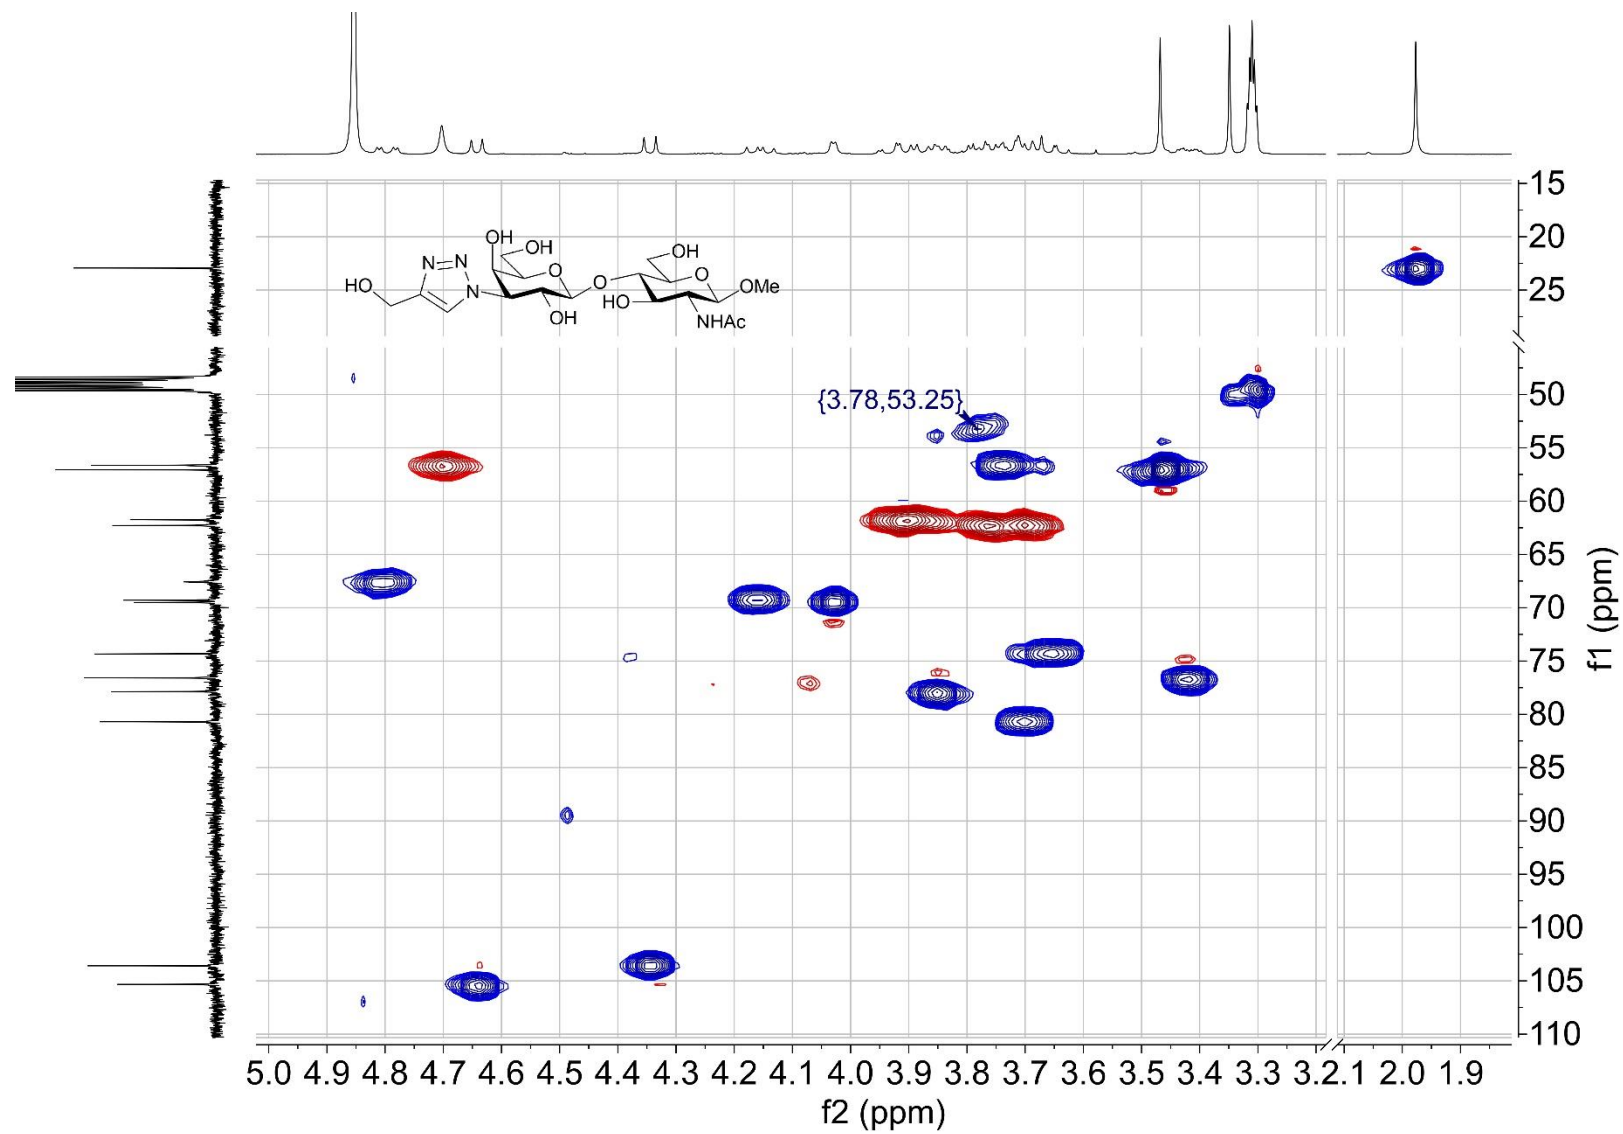

$^1\text{H}$ - $^{13}\text{C}$  HMBC 29

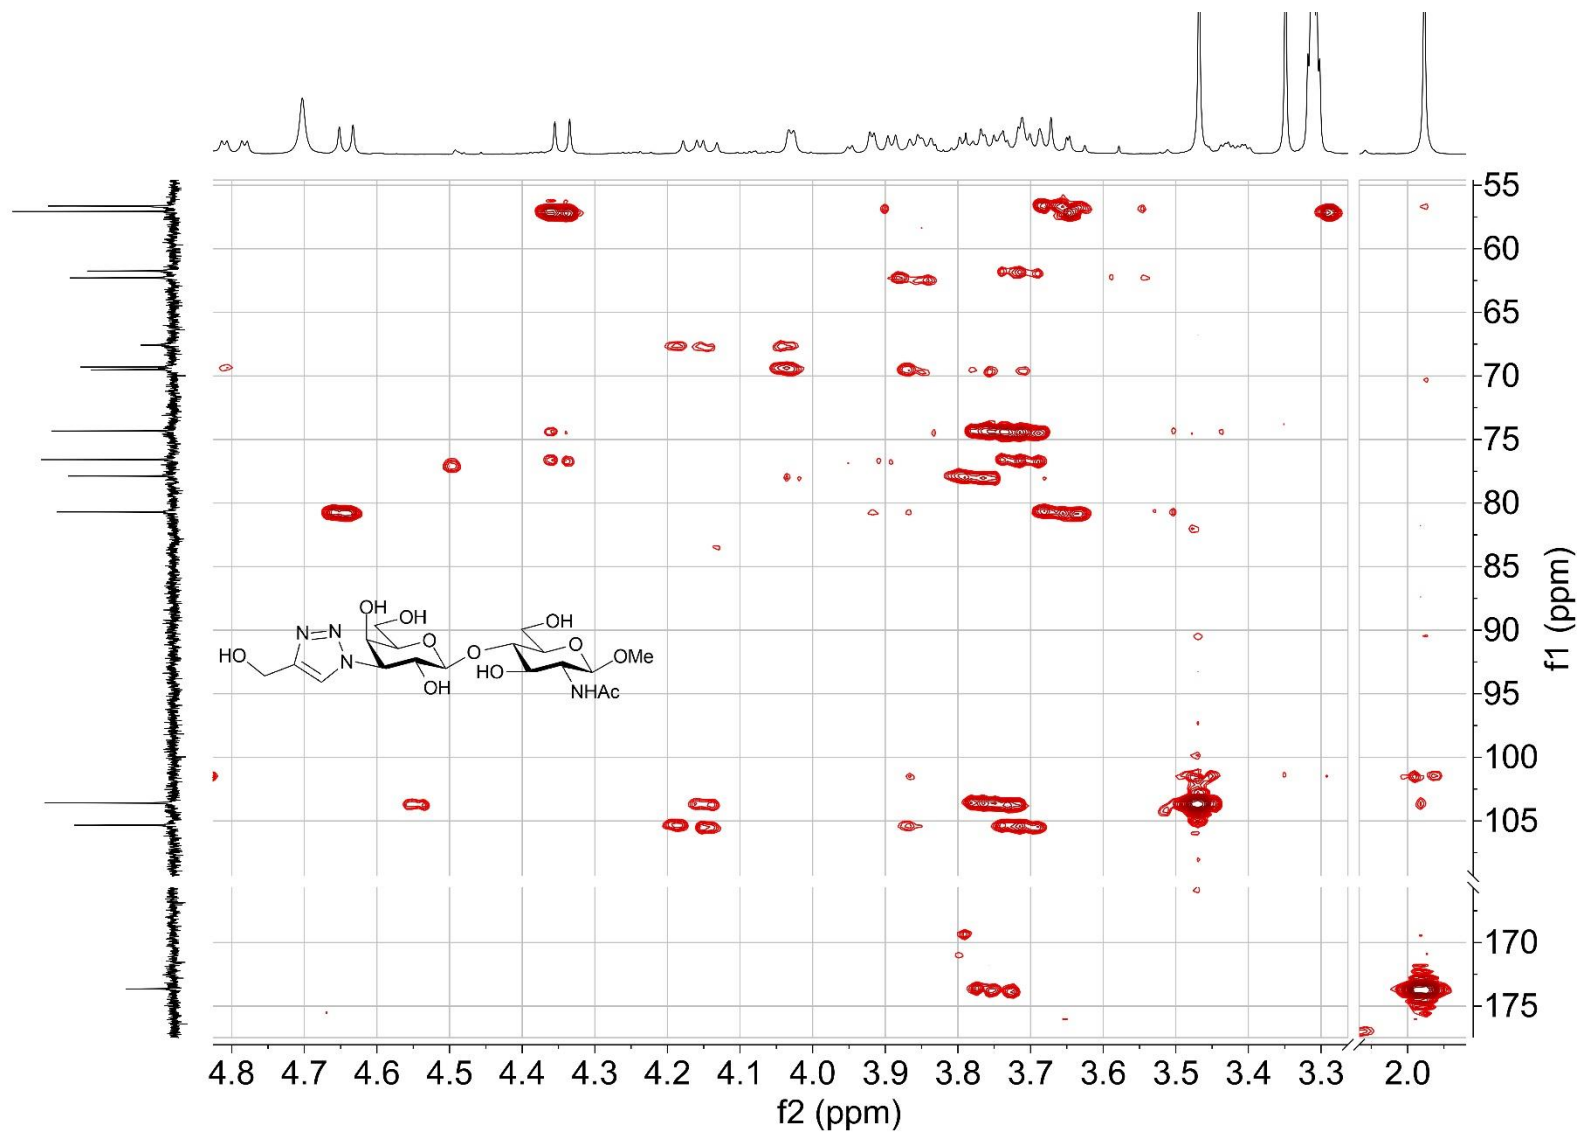



# NMR COMPOUND 30

## <sup>1</sup>H NMR (400 MHz, MeOD) 30

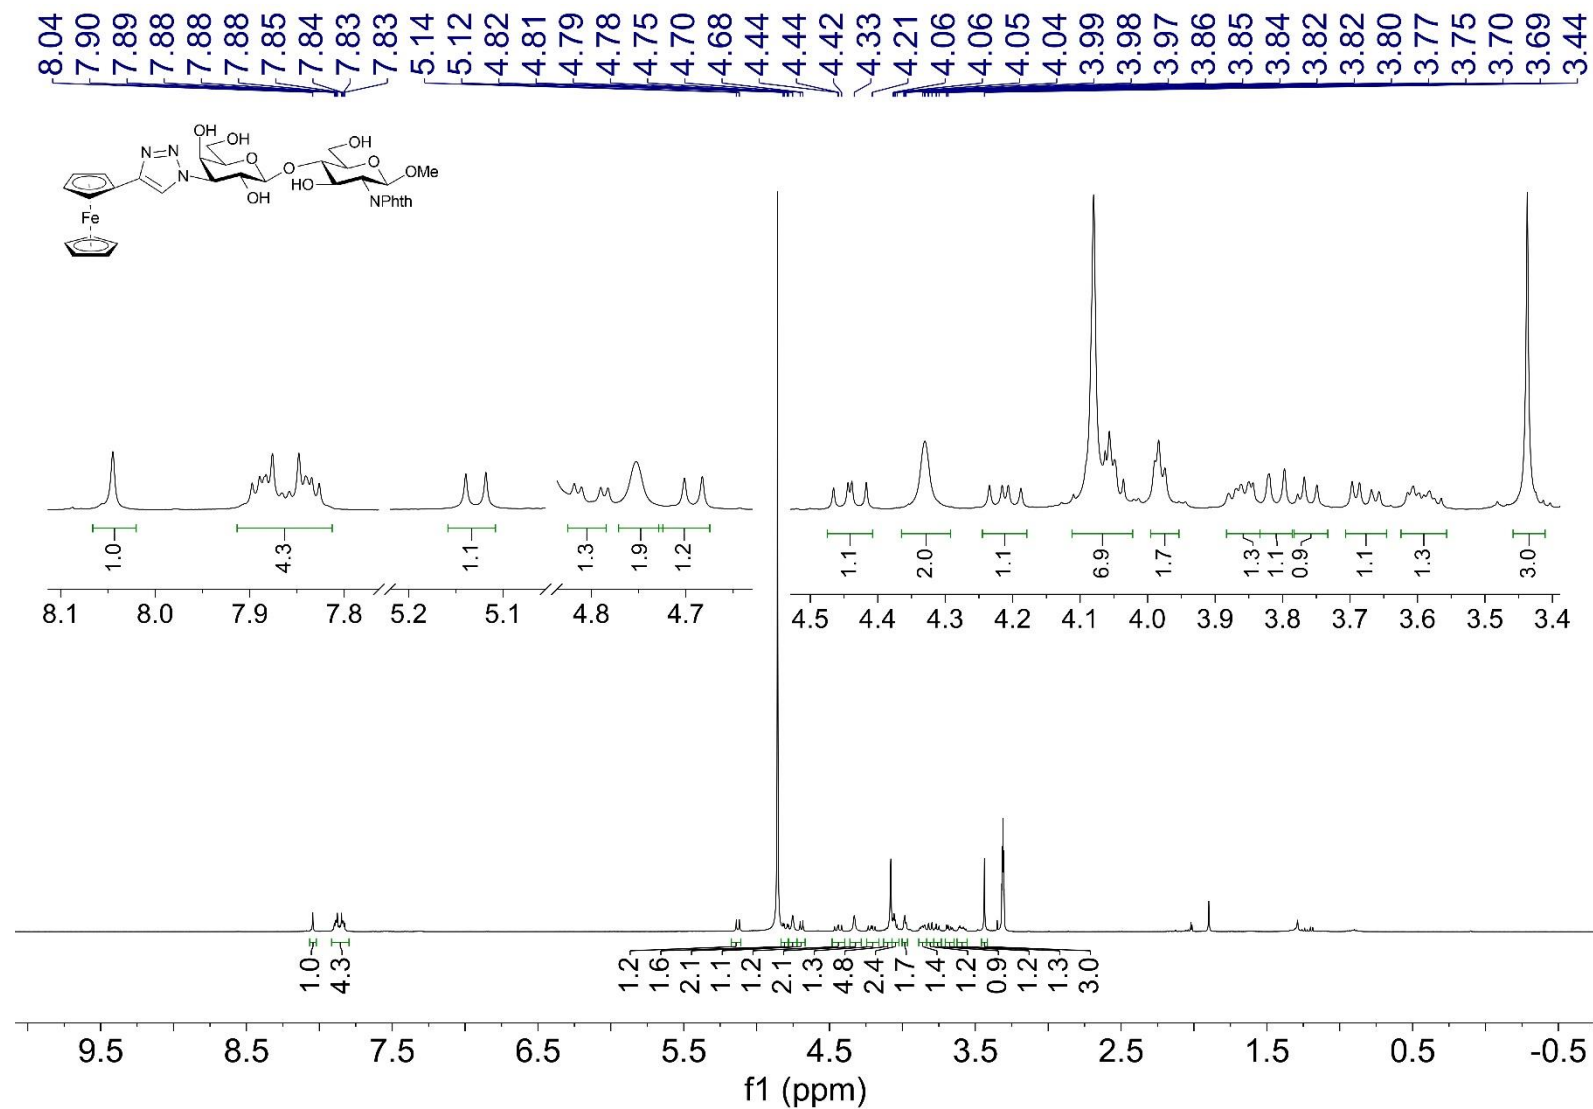

<sup>13</sup>C NMR (101 MHz, MeOD) 30

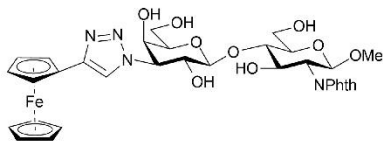

- ~147.35
- ~135.62
- ~132.99
- ~124.20
- ~121.19
- ~105.42
- ~100.65
- 81.05
- 77.99
- 76.93
- 71.14
- 70.63
- 69.79
- 69.68
- 69.28
- 67.68
- 67.38
- 62.44
- 61.66
- 57.83
- 57.11

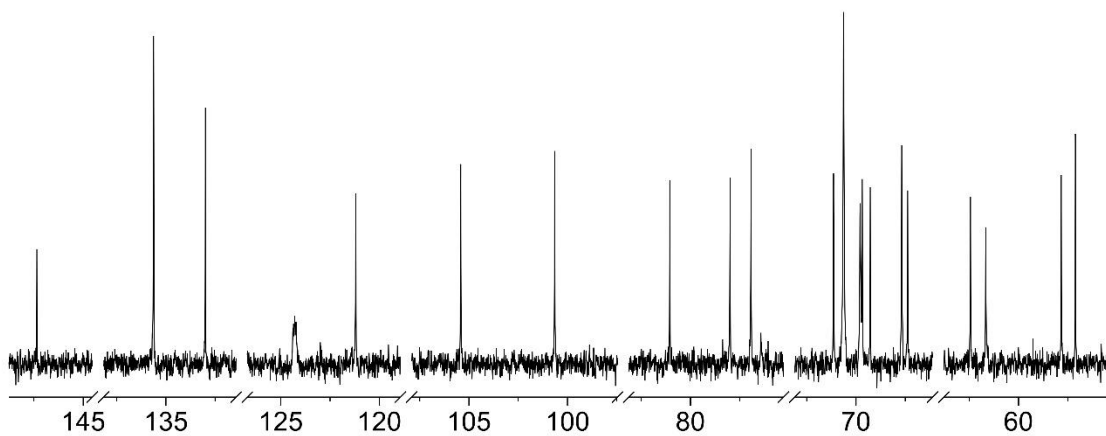

210 200 190 180 170 160 150 140 130 120 110 100 90 80 70 60 50 40 30 20 10 0 -1  
f1 (ppm)

<sup>1</sup>H-<sup>1</sup>H COSY 30

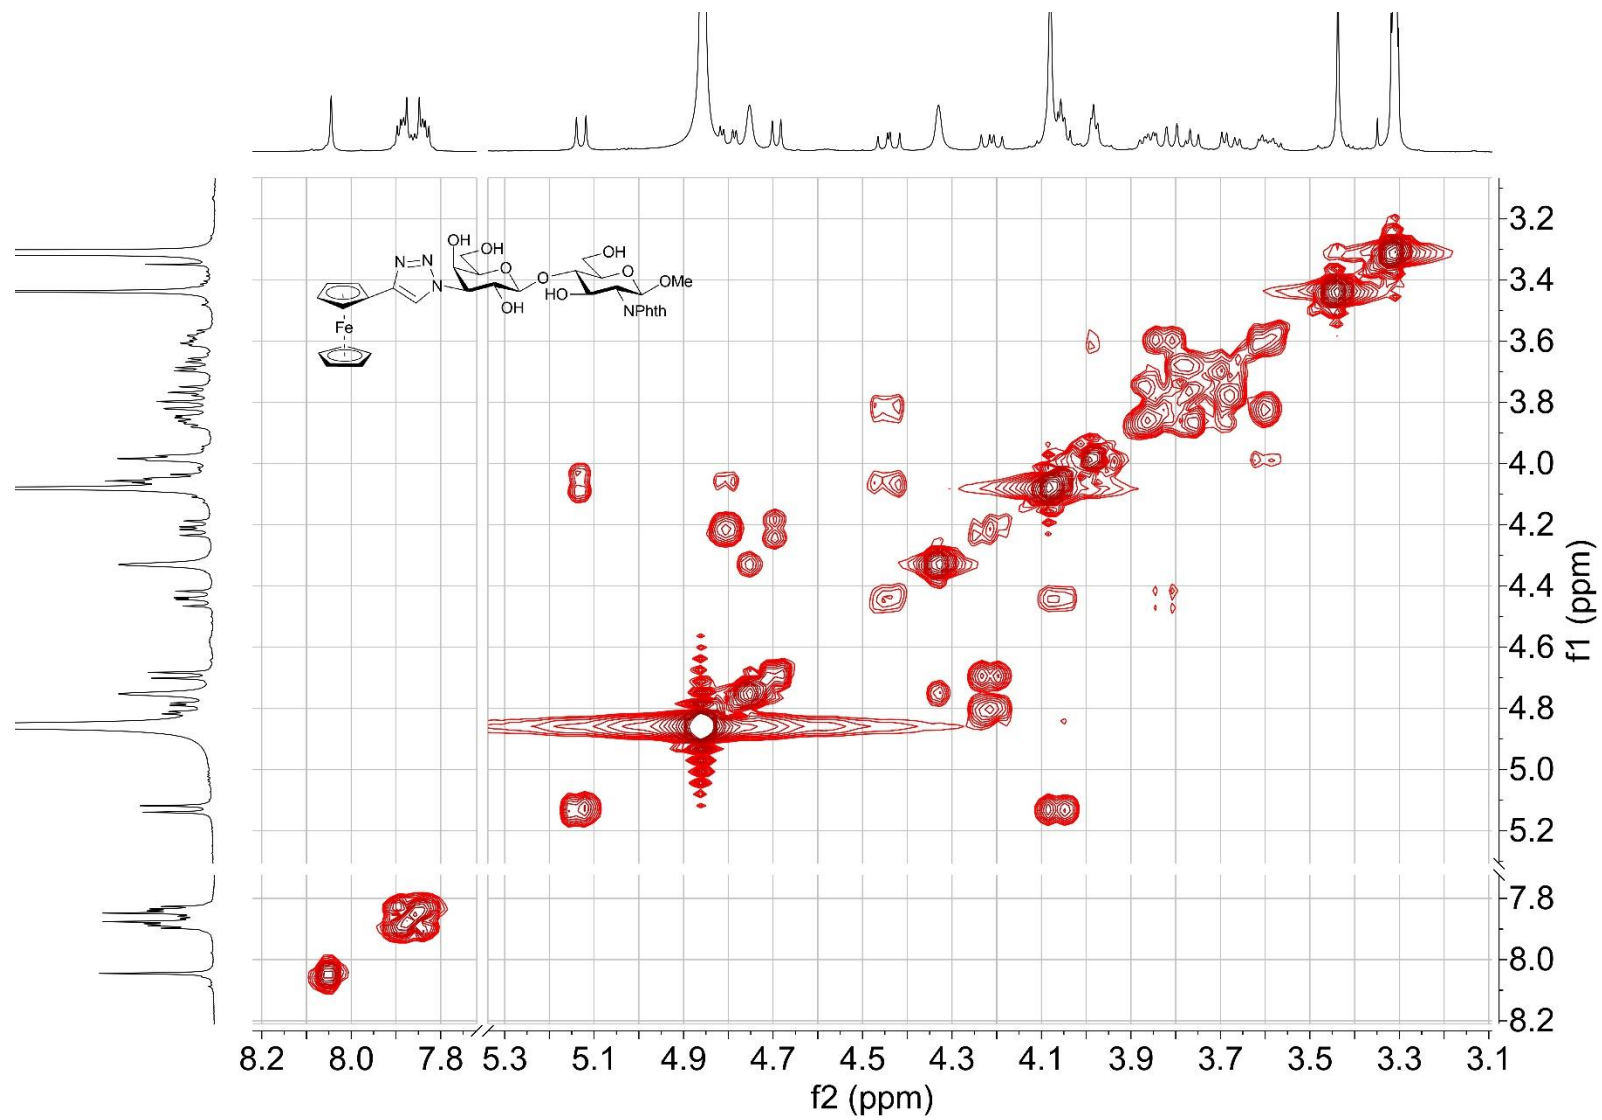

$^1\text{H}$ - $^{13}\text{C}$  HSQC 30

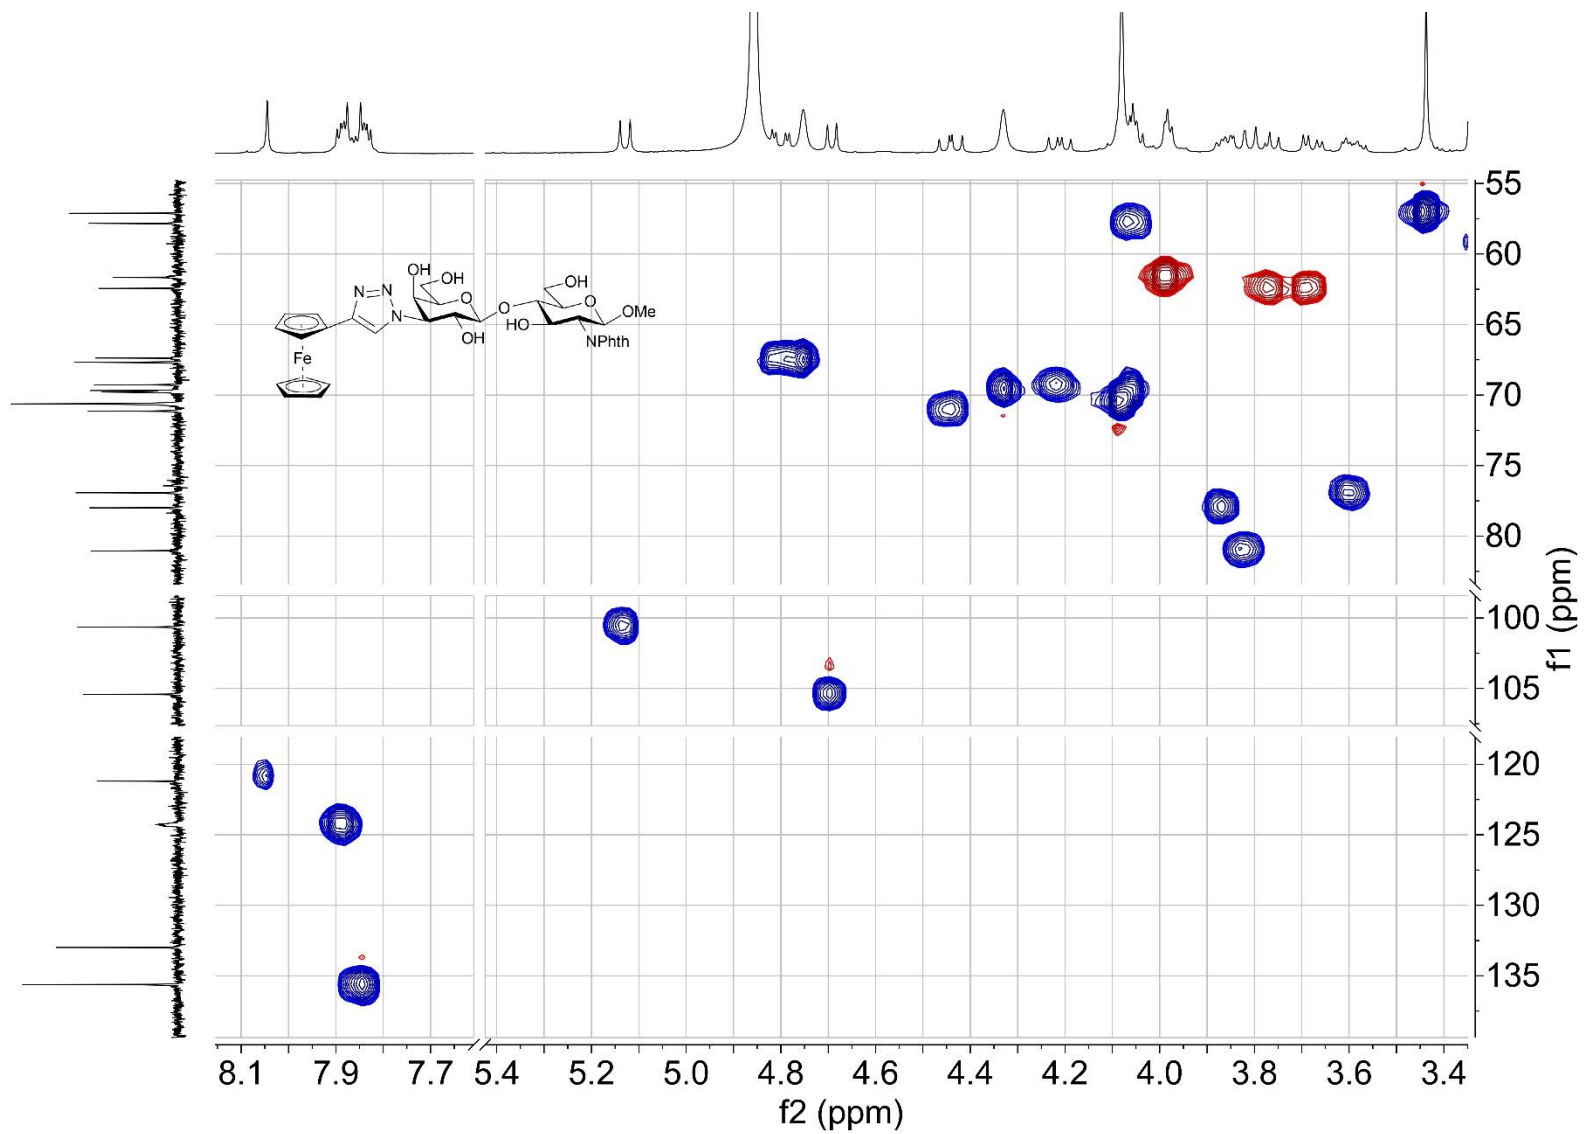

$^1\text{H}$ - $^{13}\text{C}$  HMBC 30

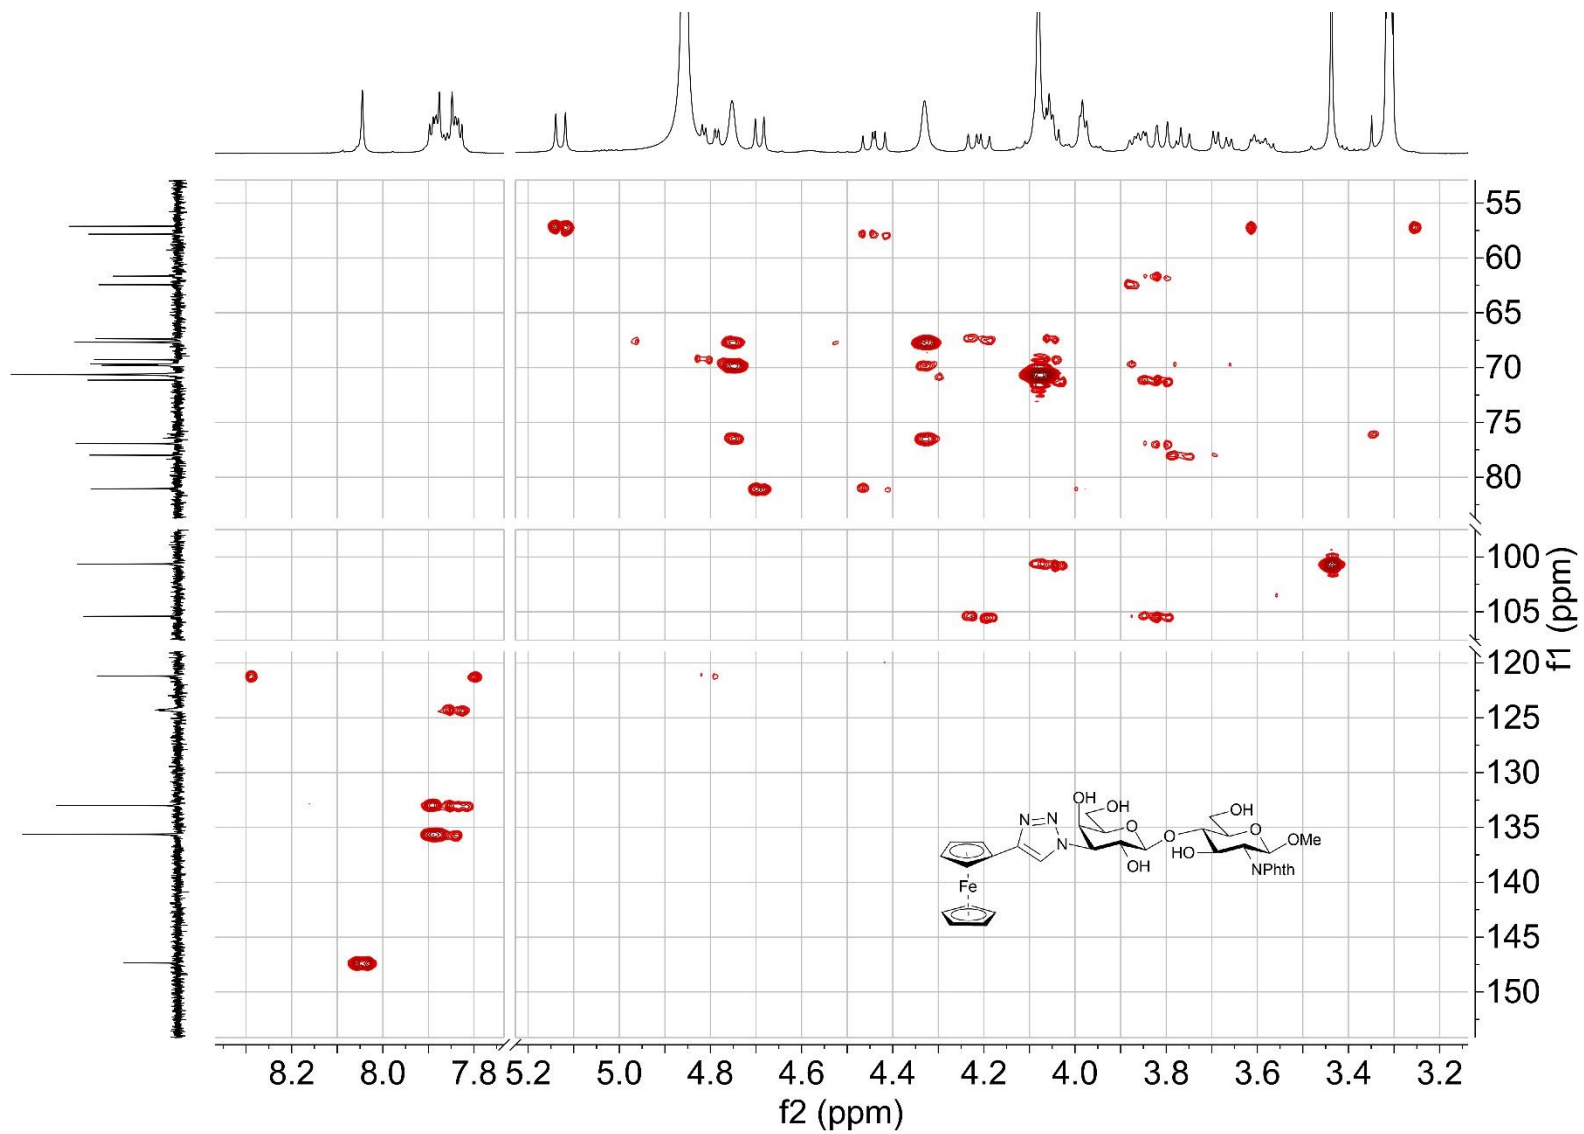

$^1\text{H}$ - $^{13}\text{C}$  HSQCTOCSY 30

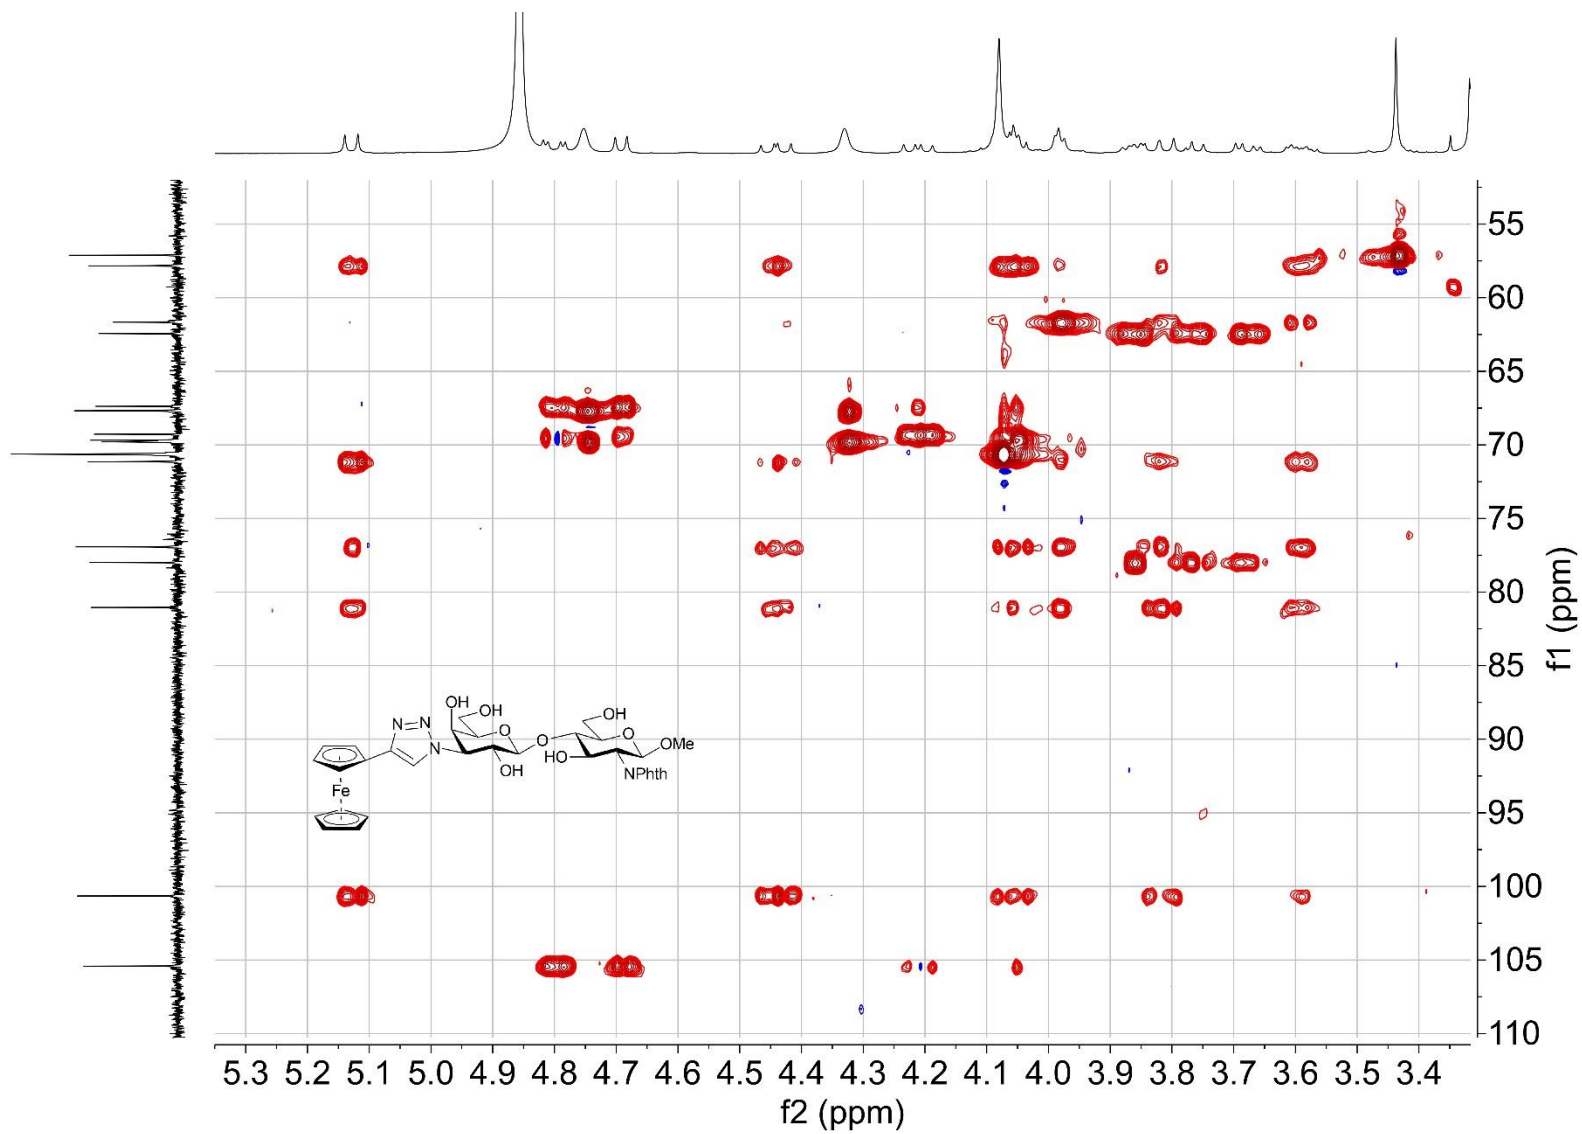

# NMR COMPOUND 33

<sup>1</sup>H NMR (400 MHz, CDCl<sub>3</sub>) 33

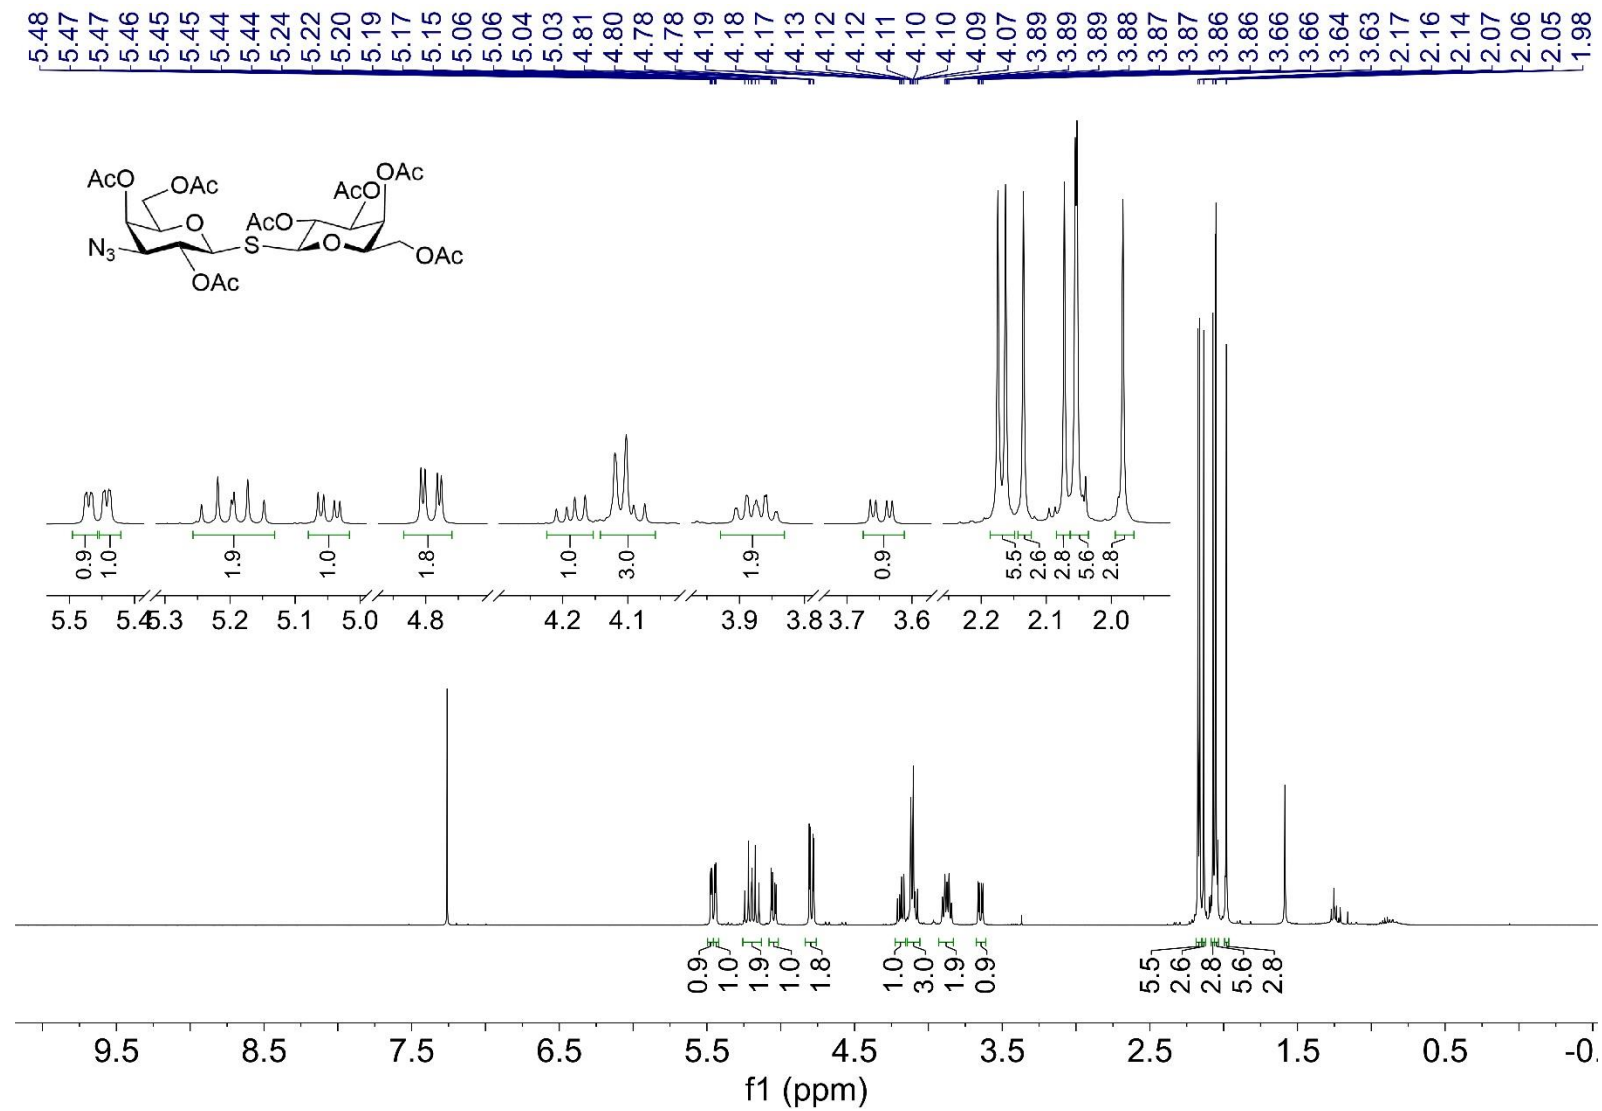

<sup>13</sup>C NMR (101 MHz, CDCl<sub>3</sub>) 33

170.50  
170.45  
170.30  
170.15  
170.07  
169.62  
169.53

81.55  
81.40  
75.63  
74.81  
71.96  
68.58  
67.82  
67.40  
67.24  
63.02  
61.75  
61.42

20.94  
20.90  
20.84  
20.82  
20.81  
20.79  
20.70

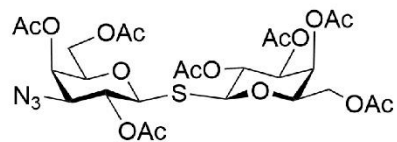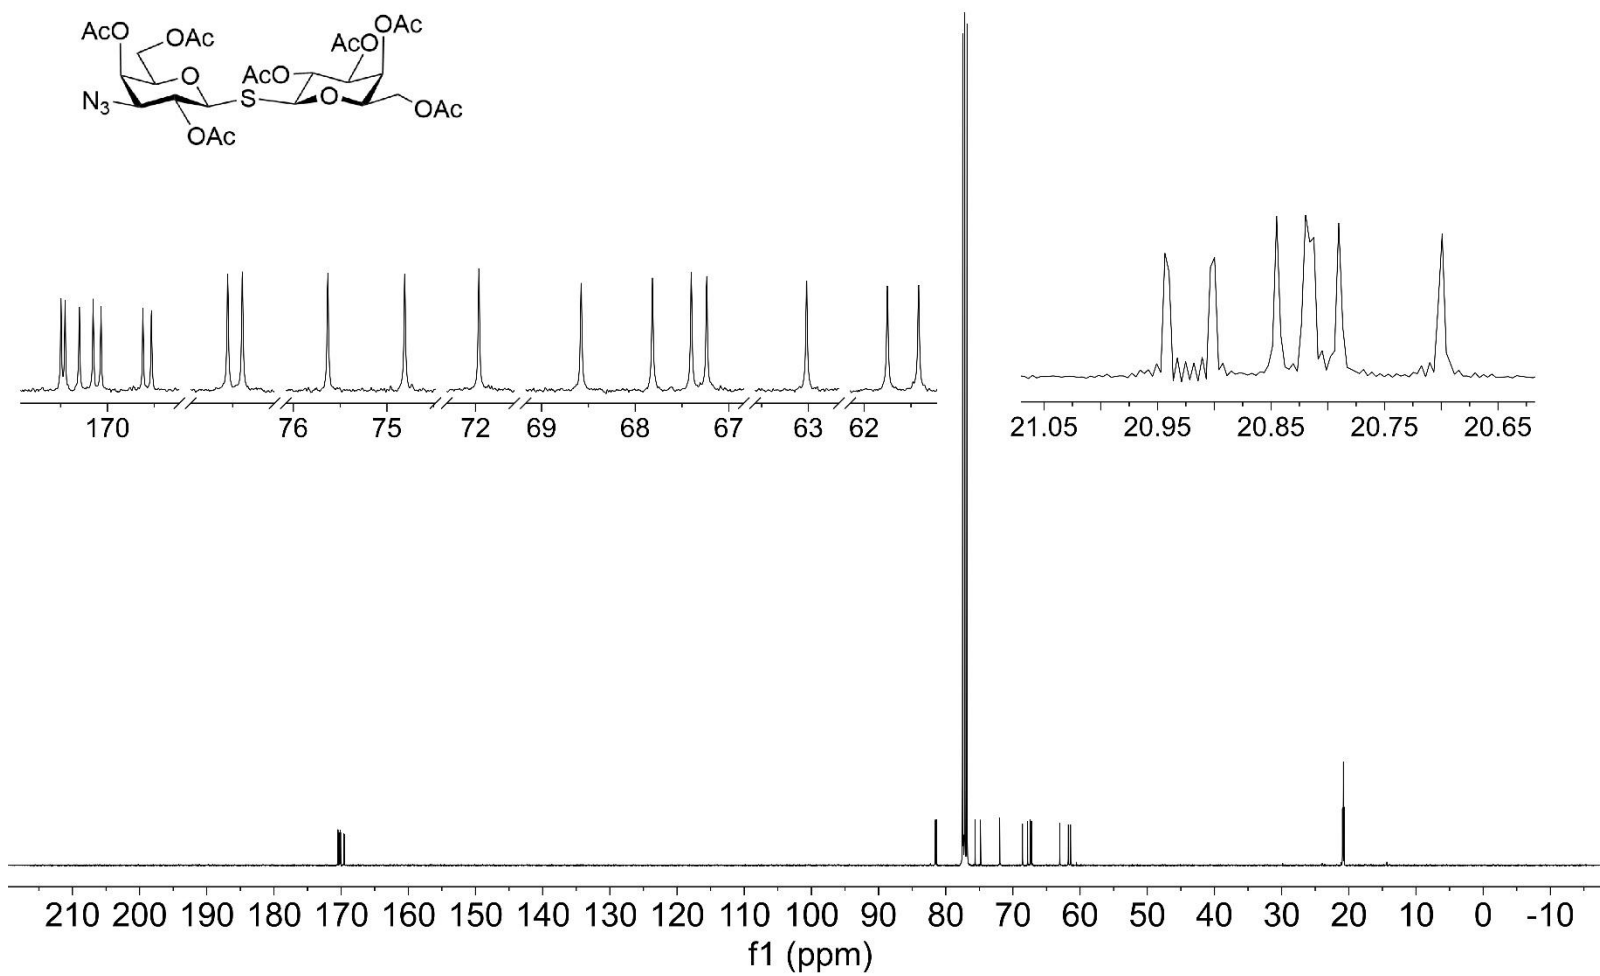



# NMR COMPOUND 34

## <sup>1</sup>H NMR (400 MHz, MeOD) 34

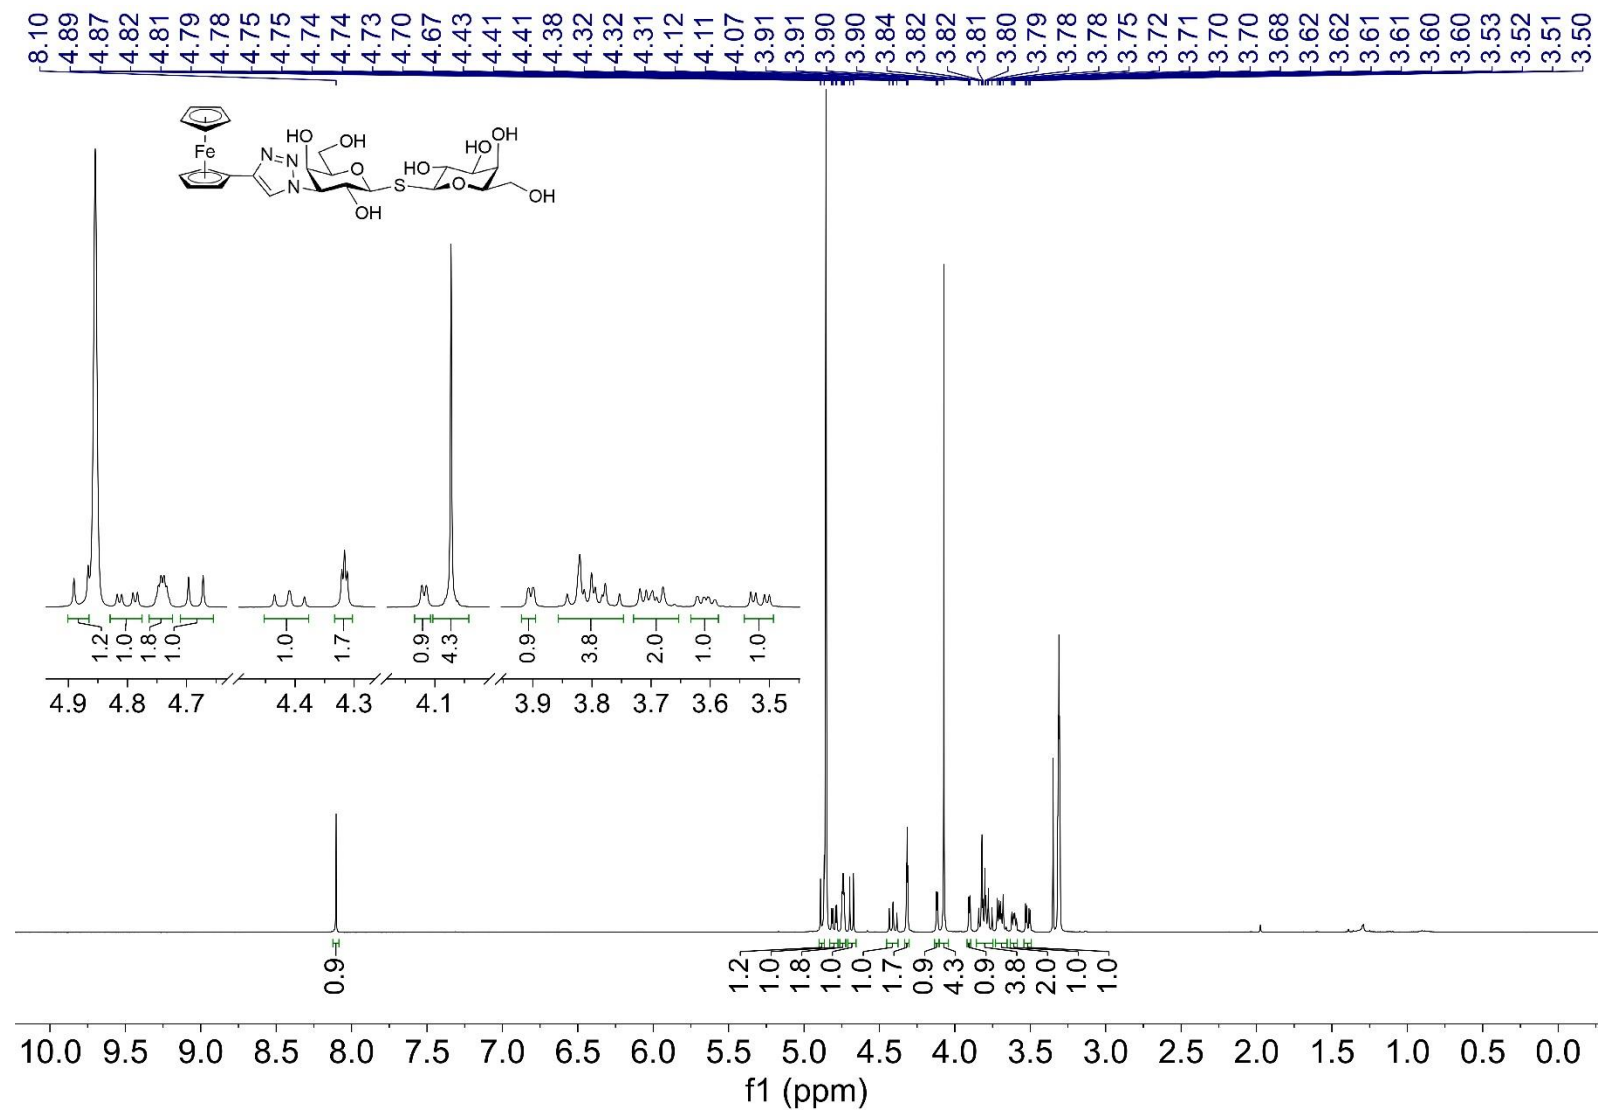

<sup>13</sup>C NMR (101 MHz, MeOD) 34

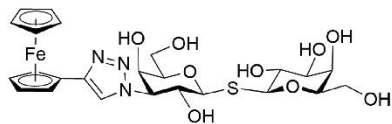

-147.32

-121.24

86.46  
85.43  
81.36  
81.08  
76.40  
76.26  
71.71  
70.74  
70.58  
69.86  
69.73  
68.75  
68.48  
67.63  
67.62  
63.04  
62.66

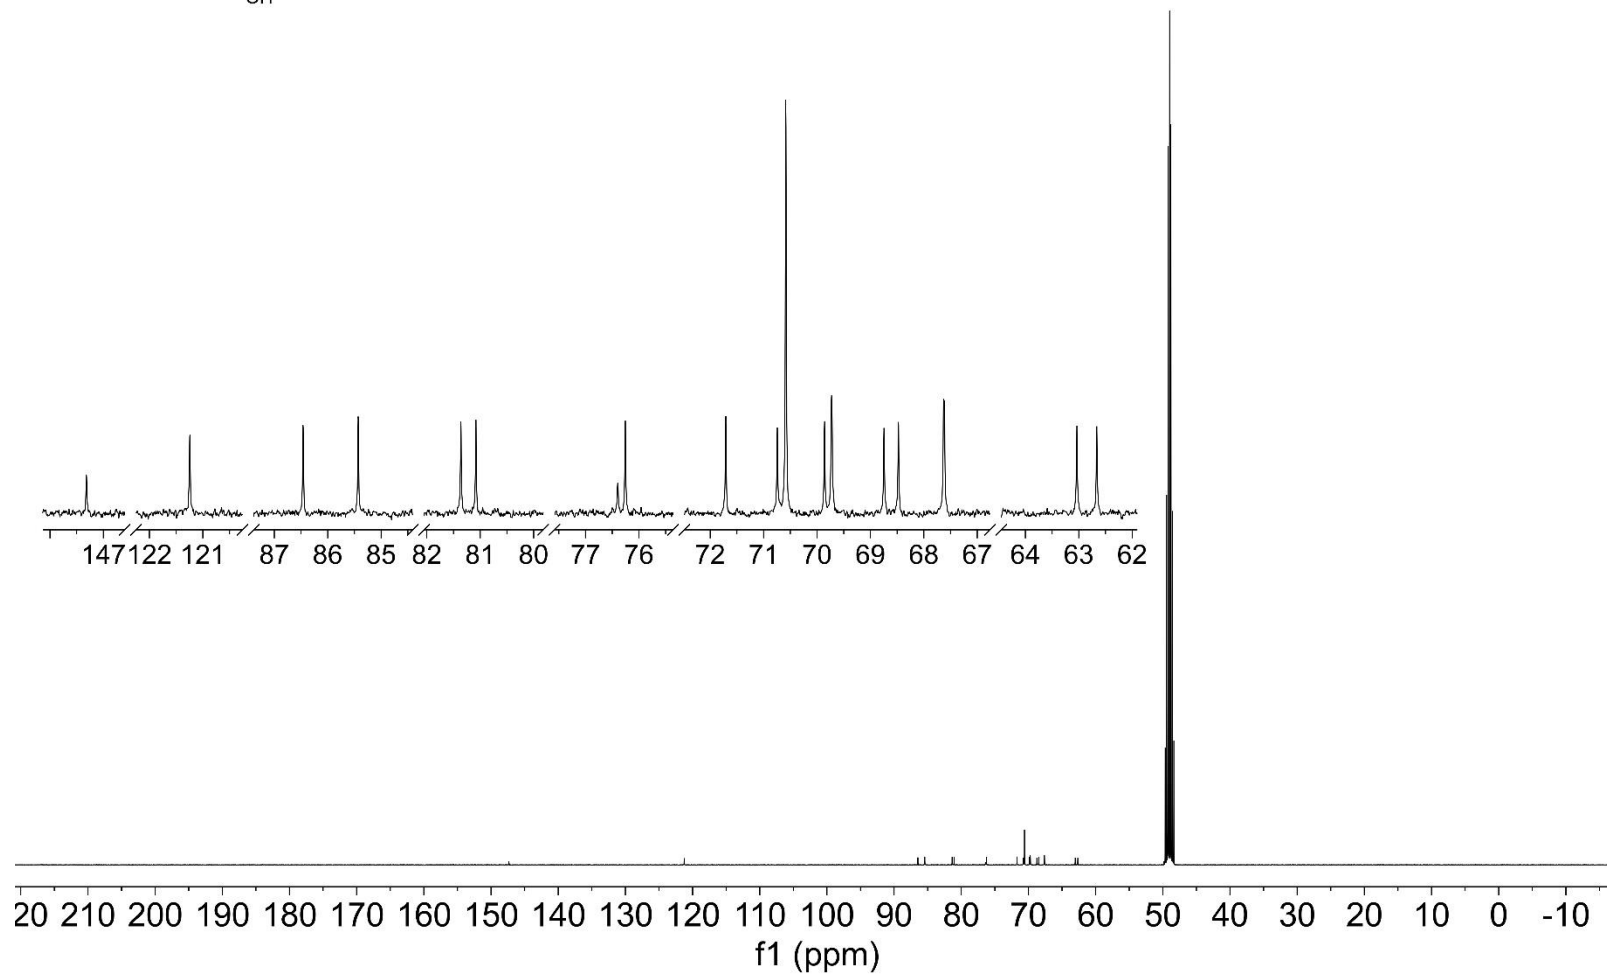

<sup>1</sup>H-<sup>1</sup>H COSY 34

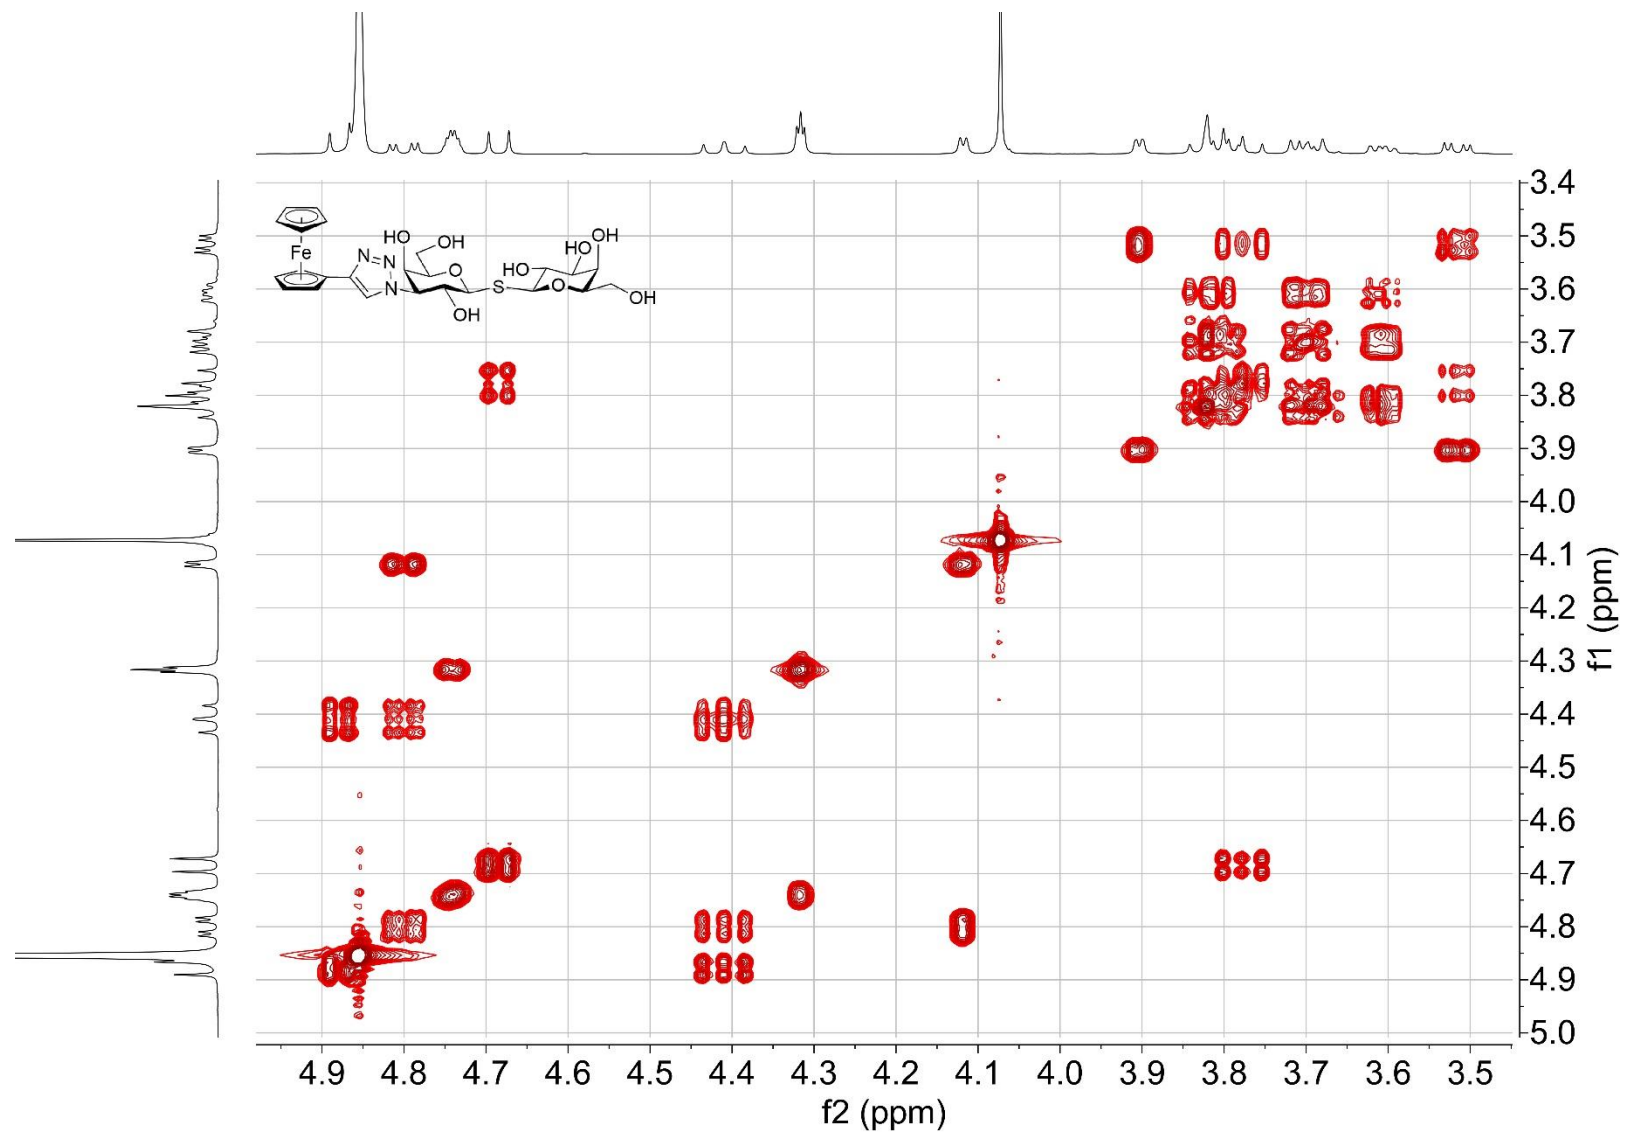

$^1\text{H}$ - $^{13}\text{C}$  HSQC 34

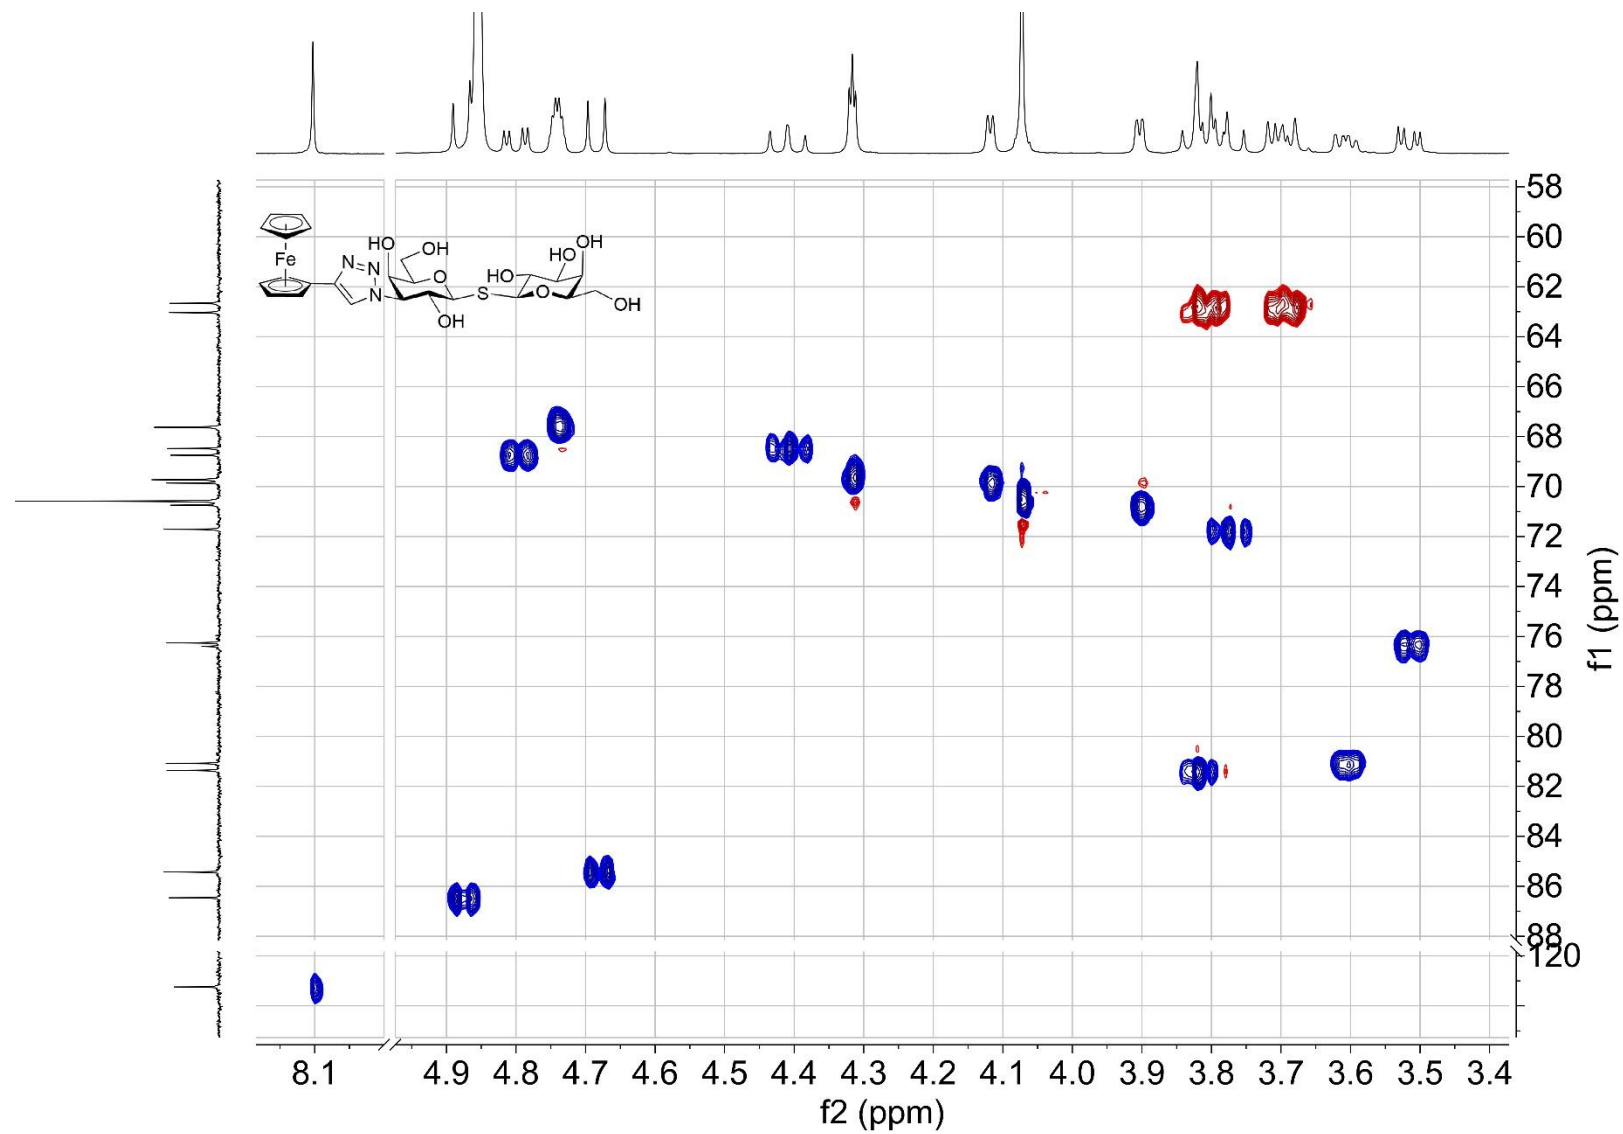

$^1\text{H}$ - $^{13}\text{C}$  HMBC 34

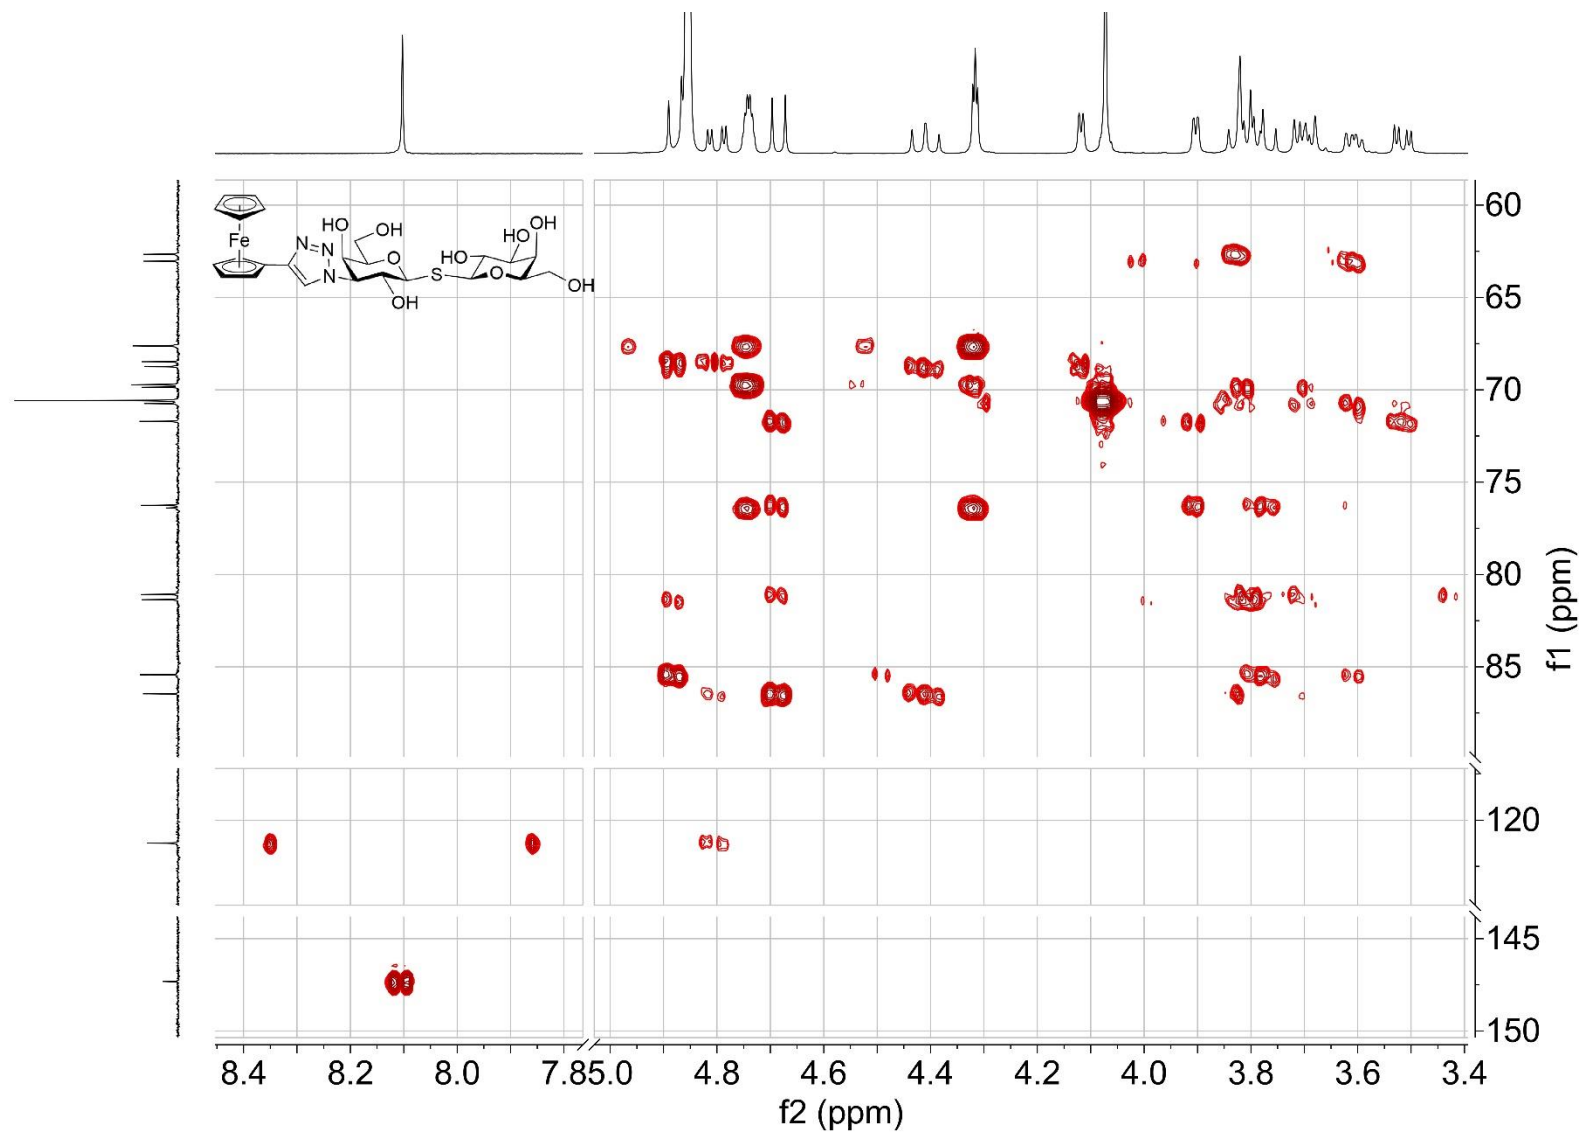

$^1\text{H}$ - $^{13}\text{C}$  HSQCTOCSY 34

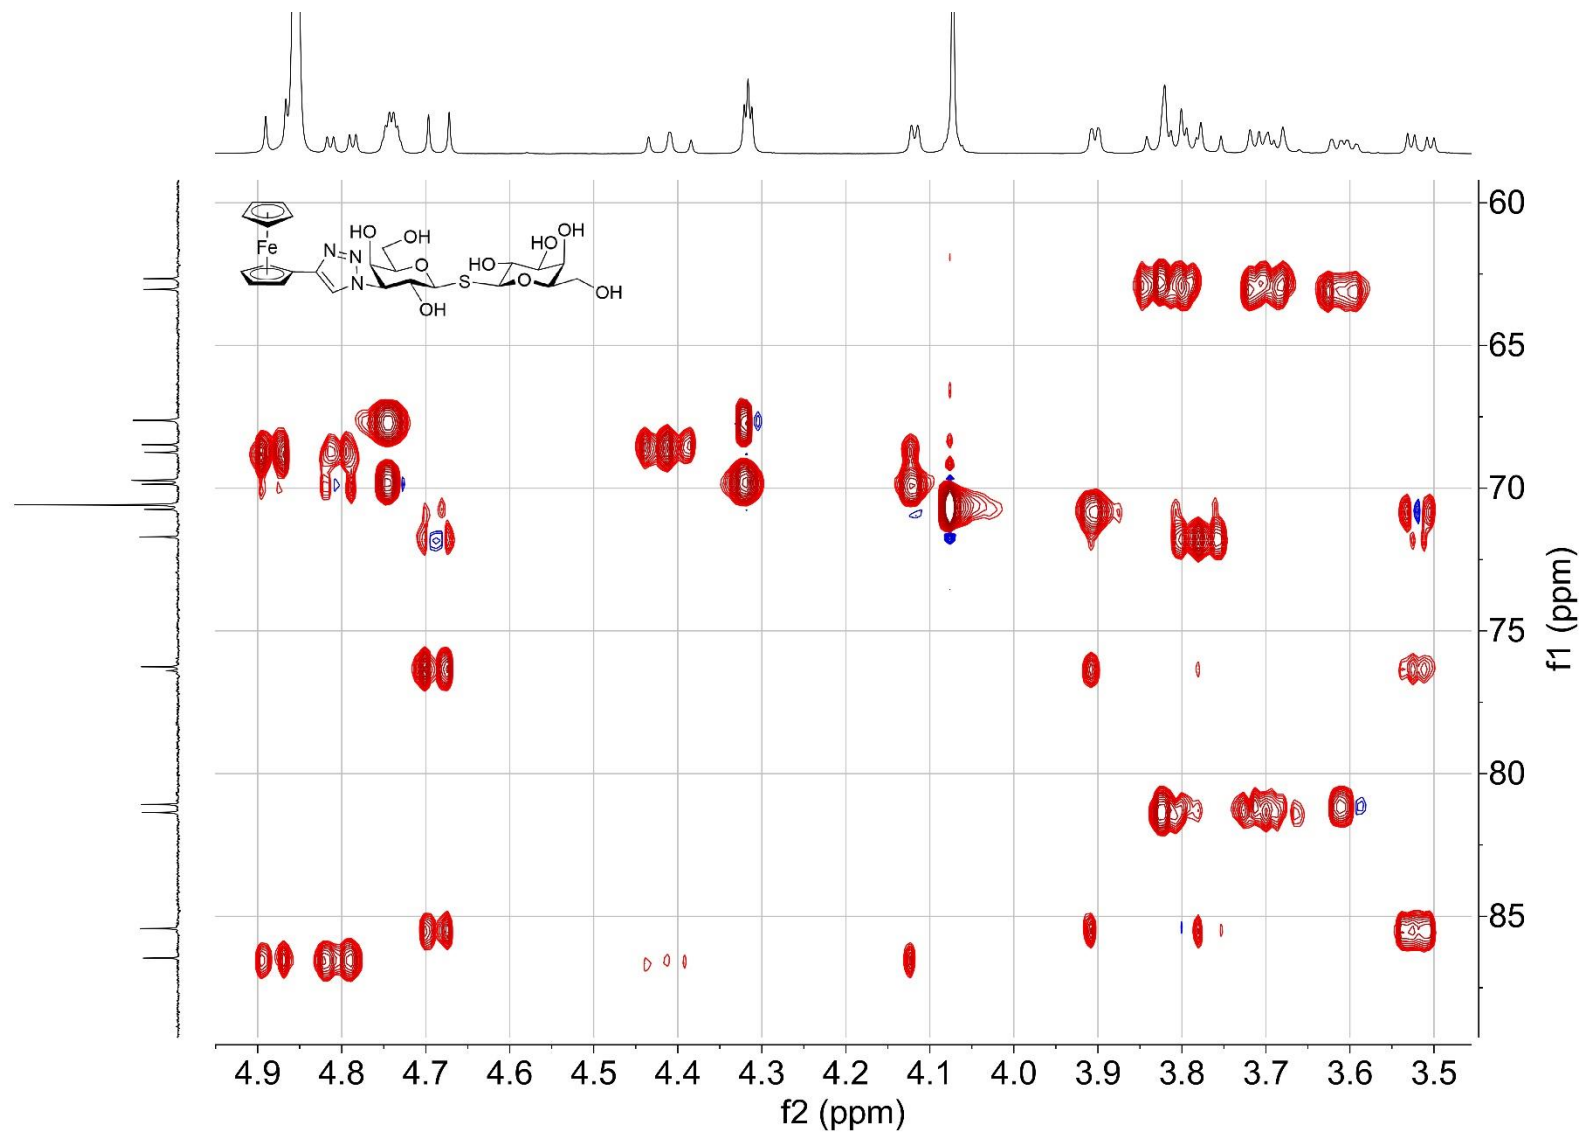

# NMR COMPOUND 36

<sup>1</sup>H NMR (400 MHz, MeOD) 36

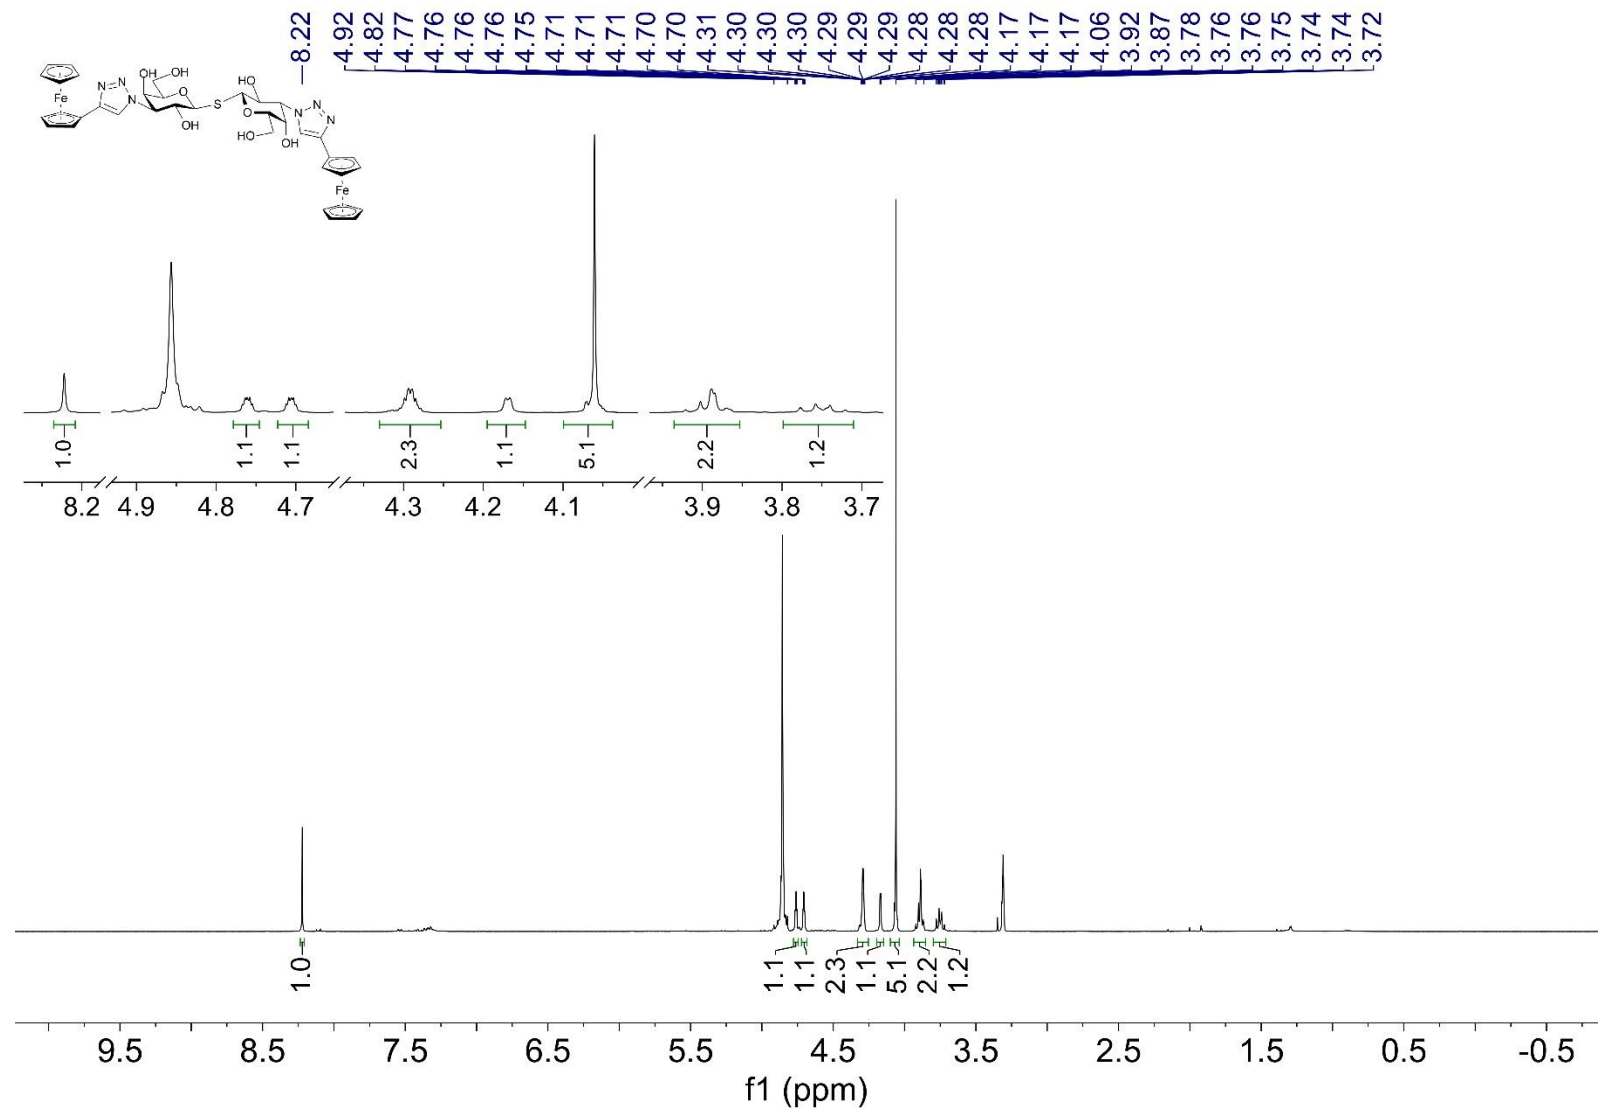

<sup>13</sup>C NMR (101 MHz, MeOD) 36

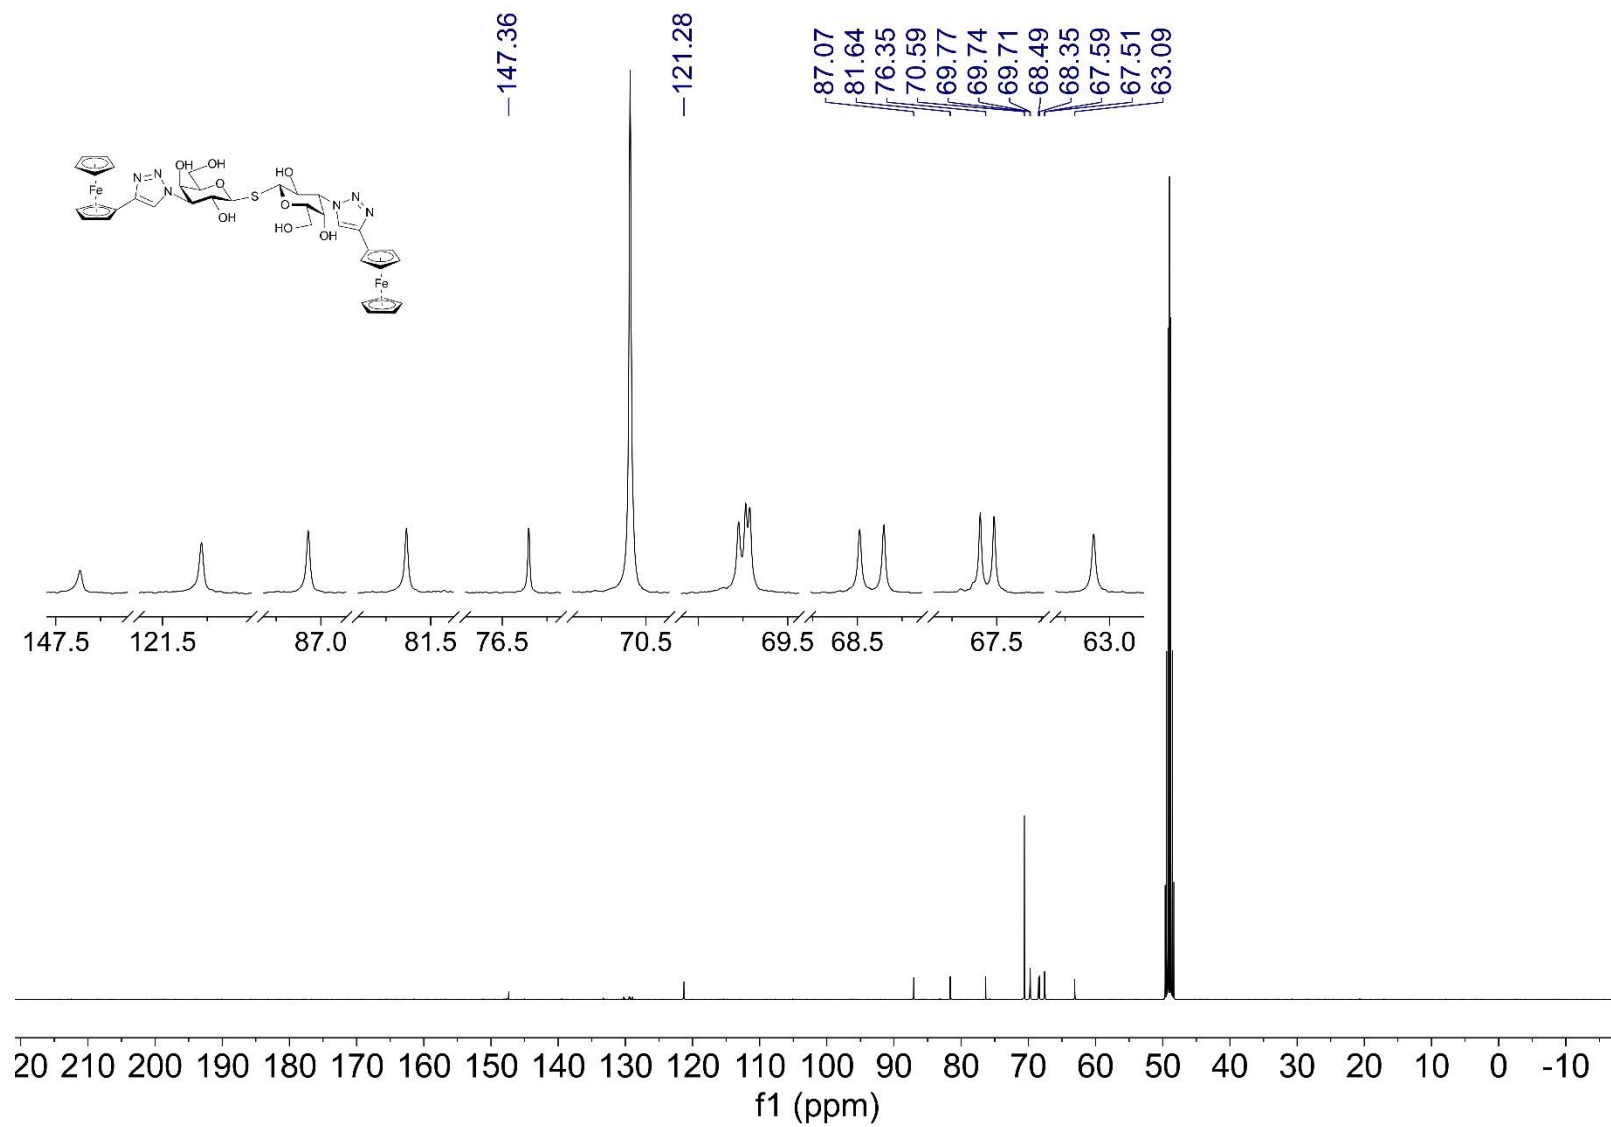



<sup>1</sup>H-<sup>1</sup>H COSY 36

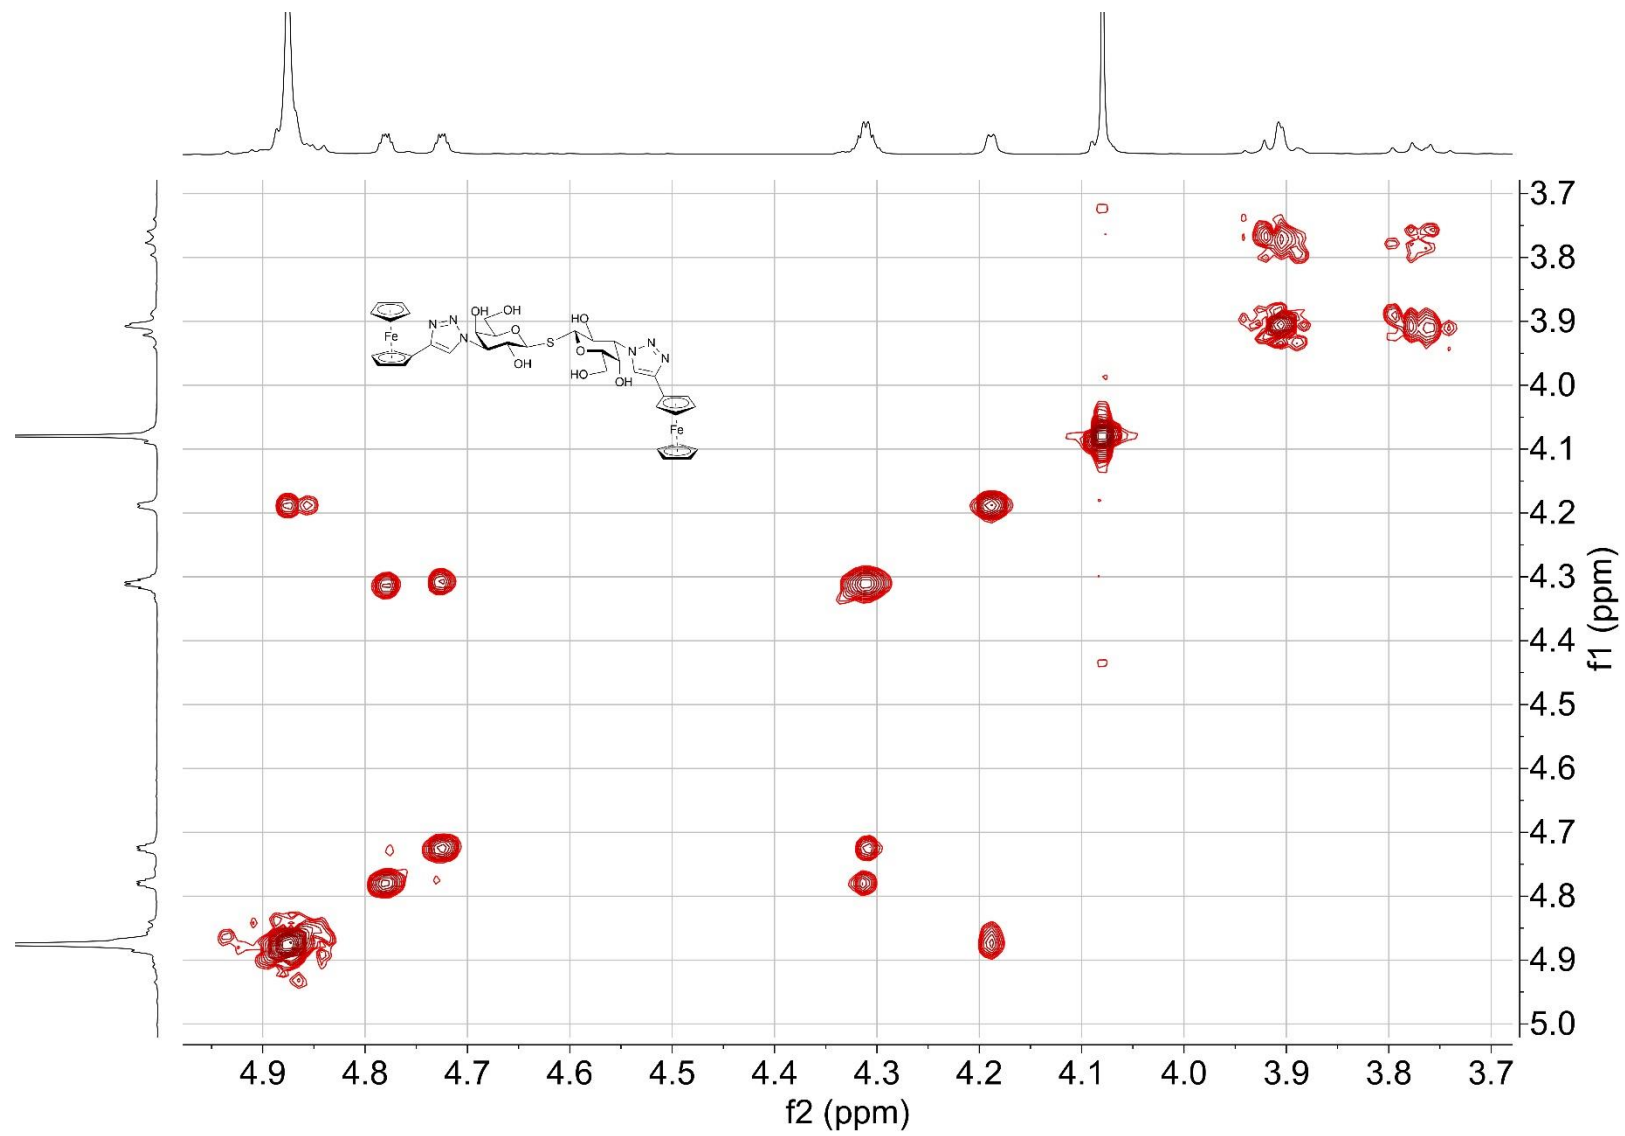

$^1\text{H}$ - $^{13}\text{C}$  HSQC 36

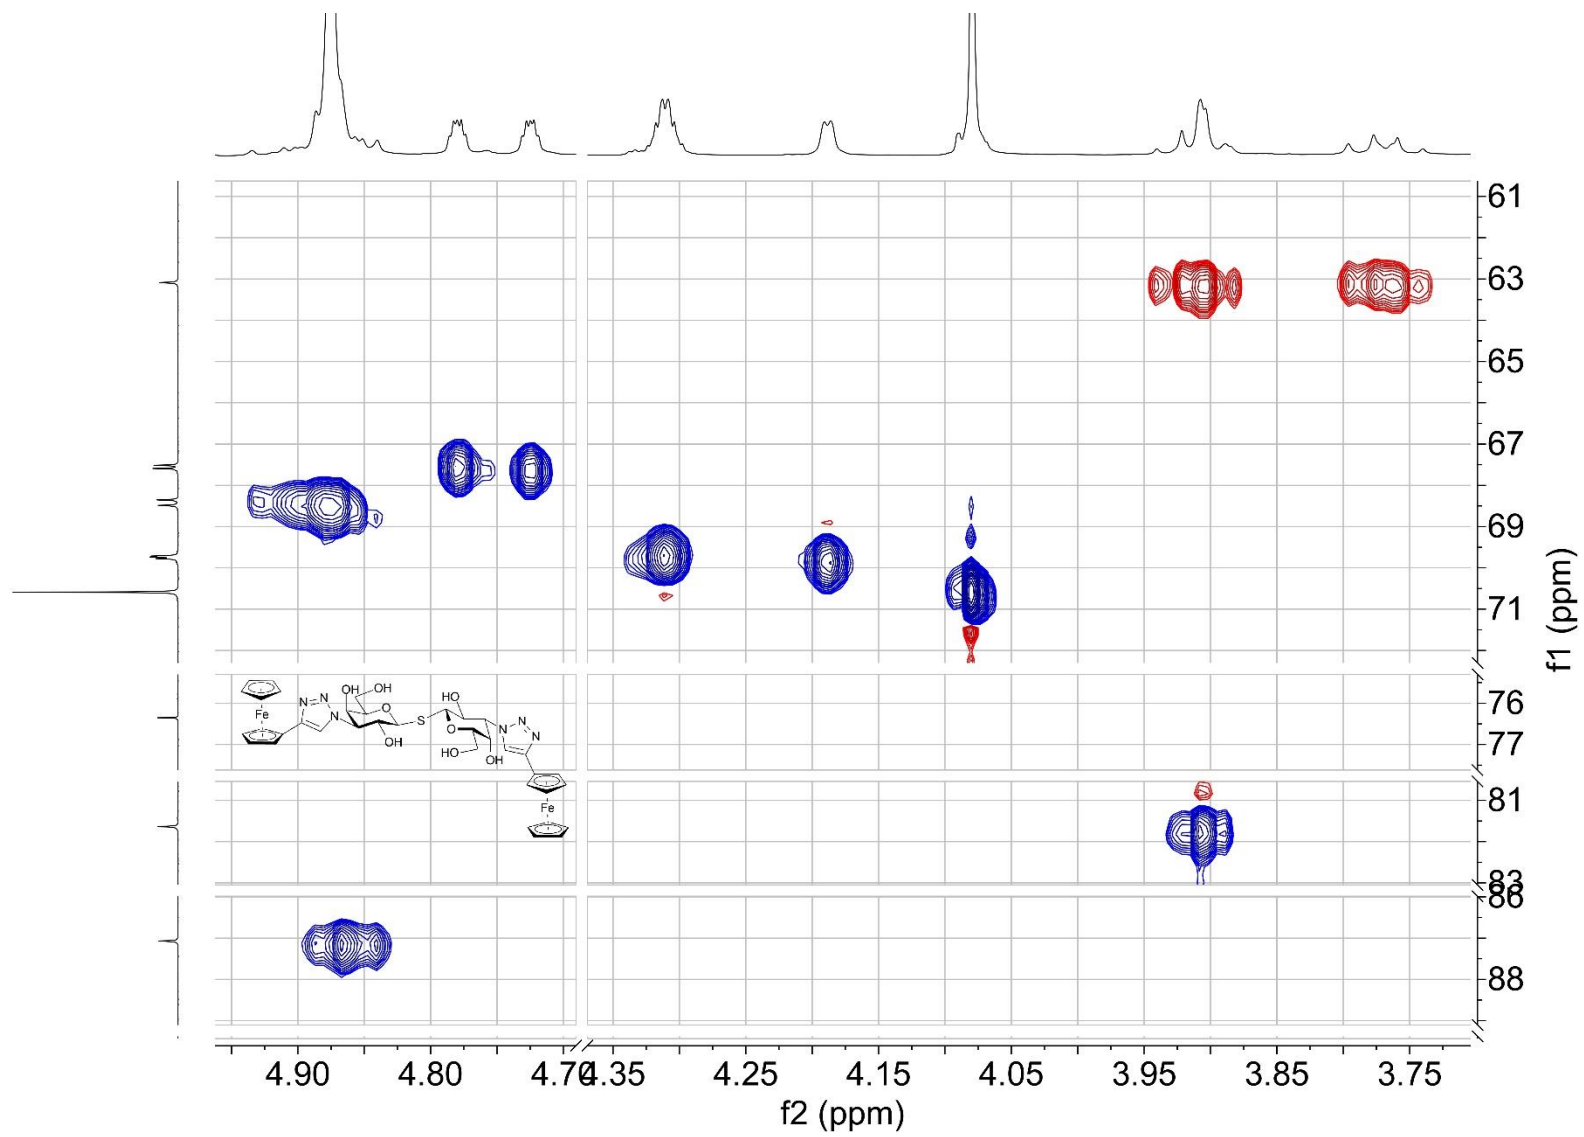

$^1\text{H}$ - $^{13}\text{C}$  HMBC 36

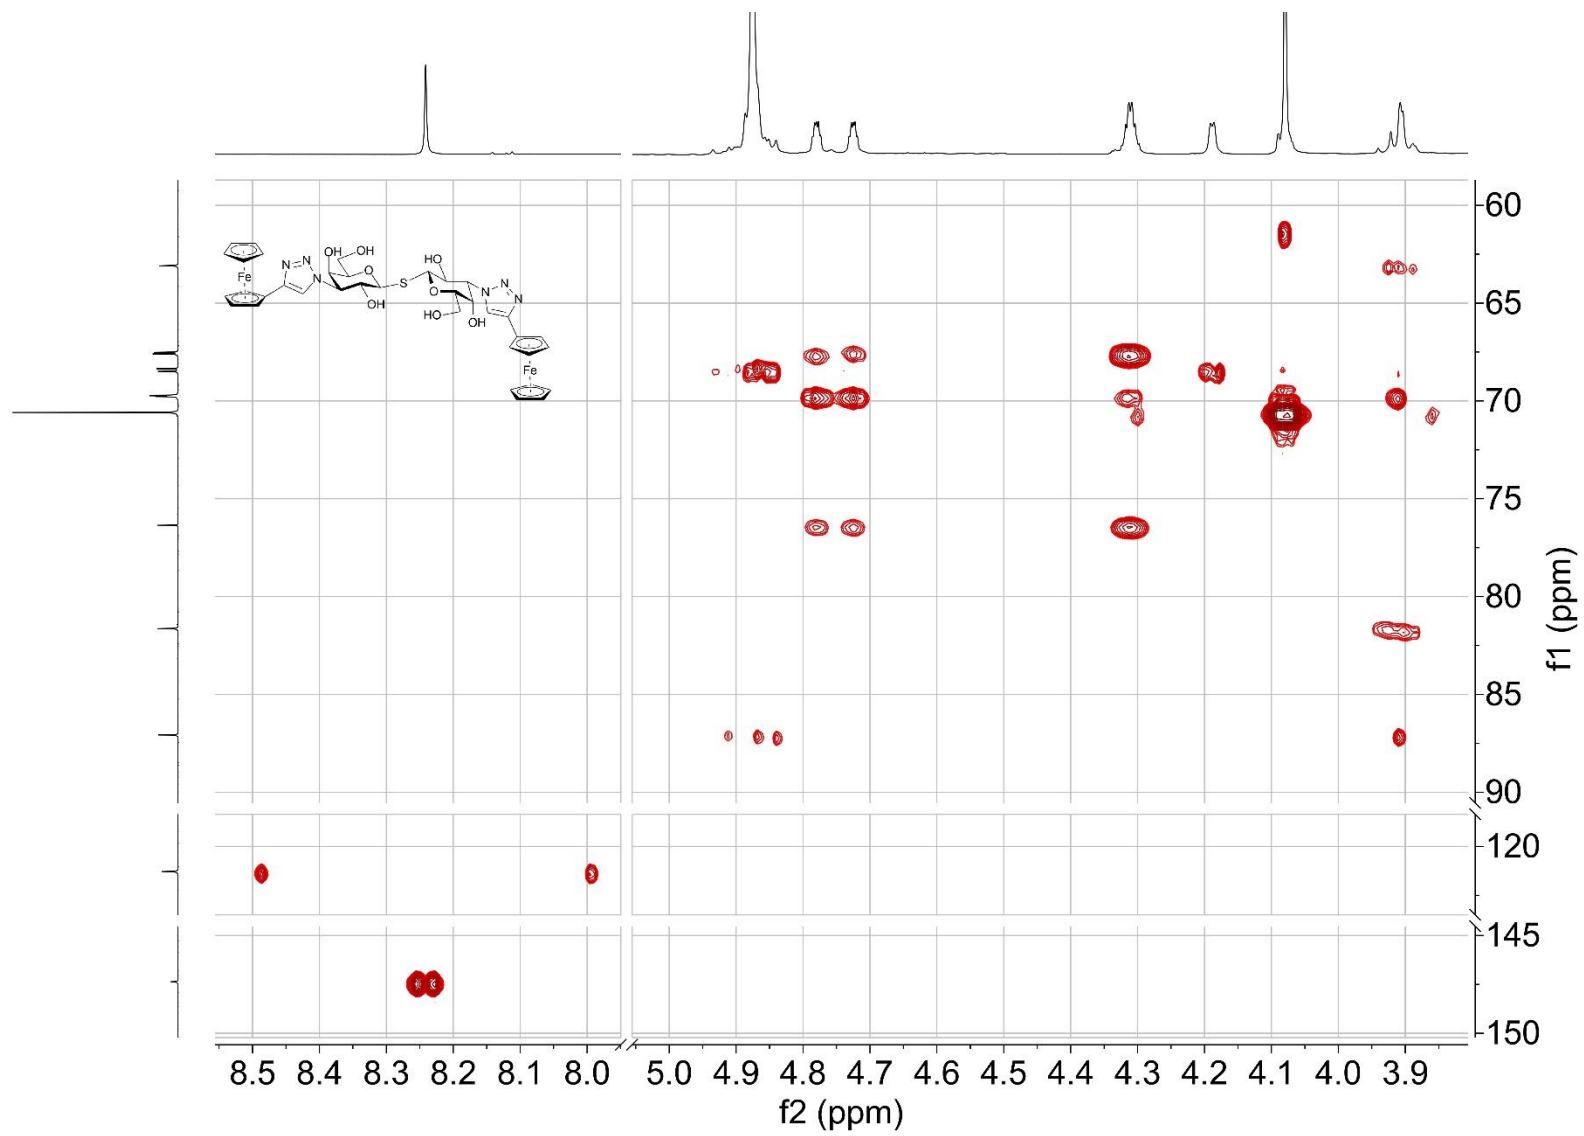

# NMR COMPOUND 36

<sup>1</sup>H NMR (400 MHz, DMSO-d<sub>6</sub>) 36

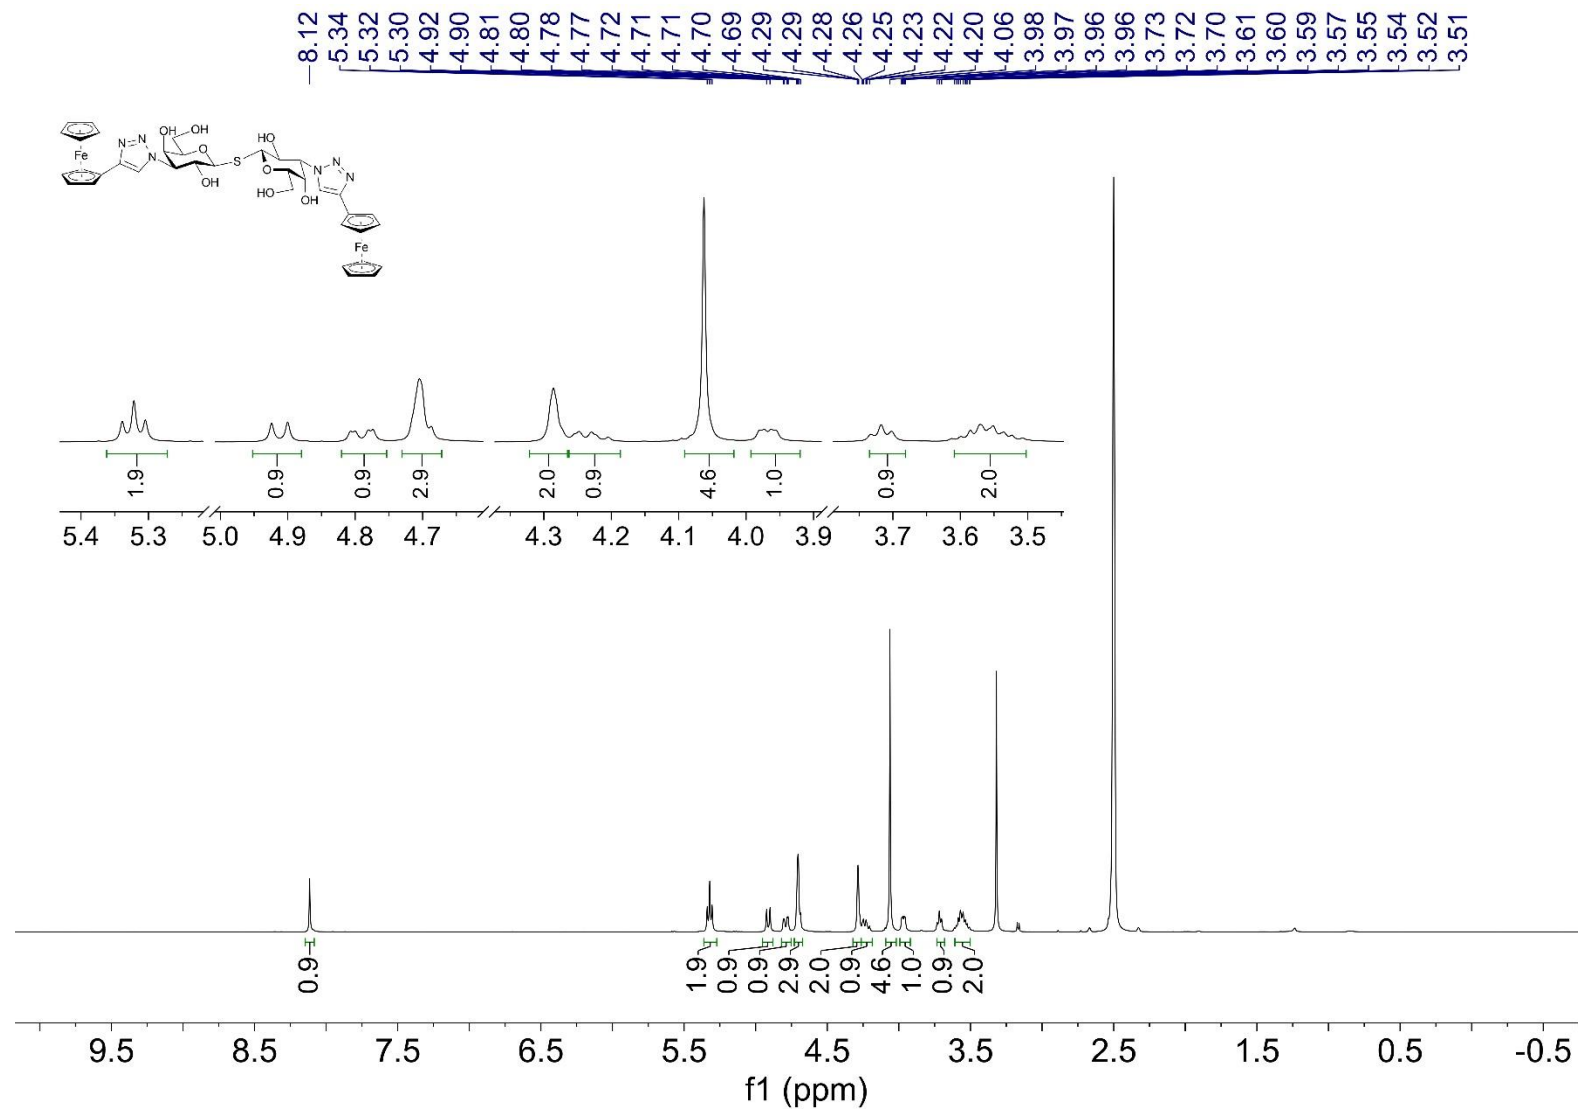

<sup>13</sup>C NMR (101 MHz, DMSO-d<sub>6</sub>) 36

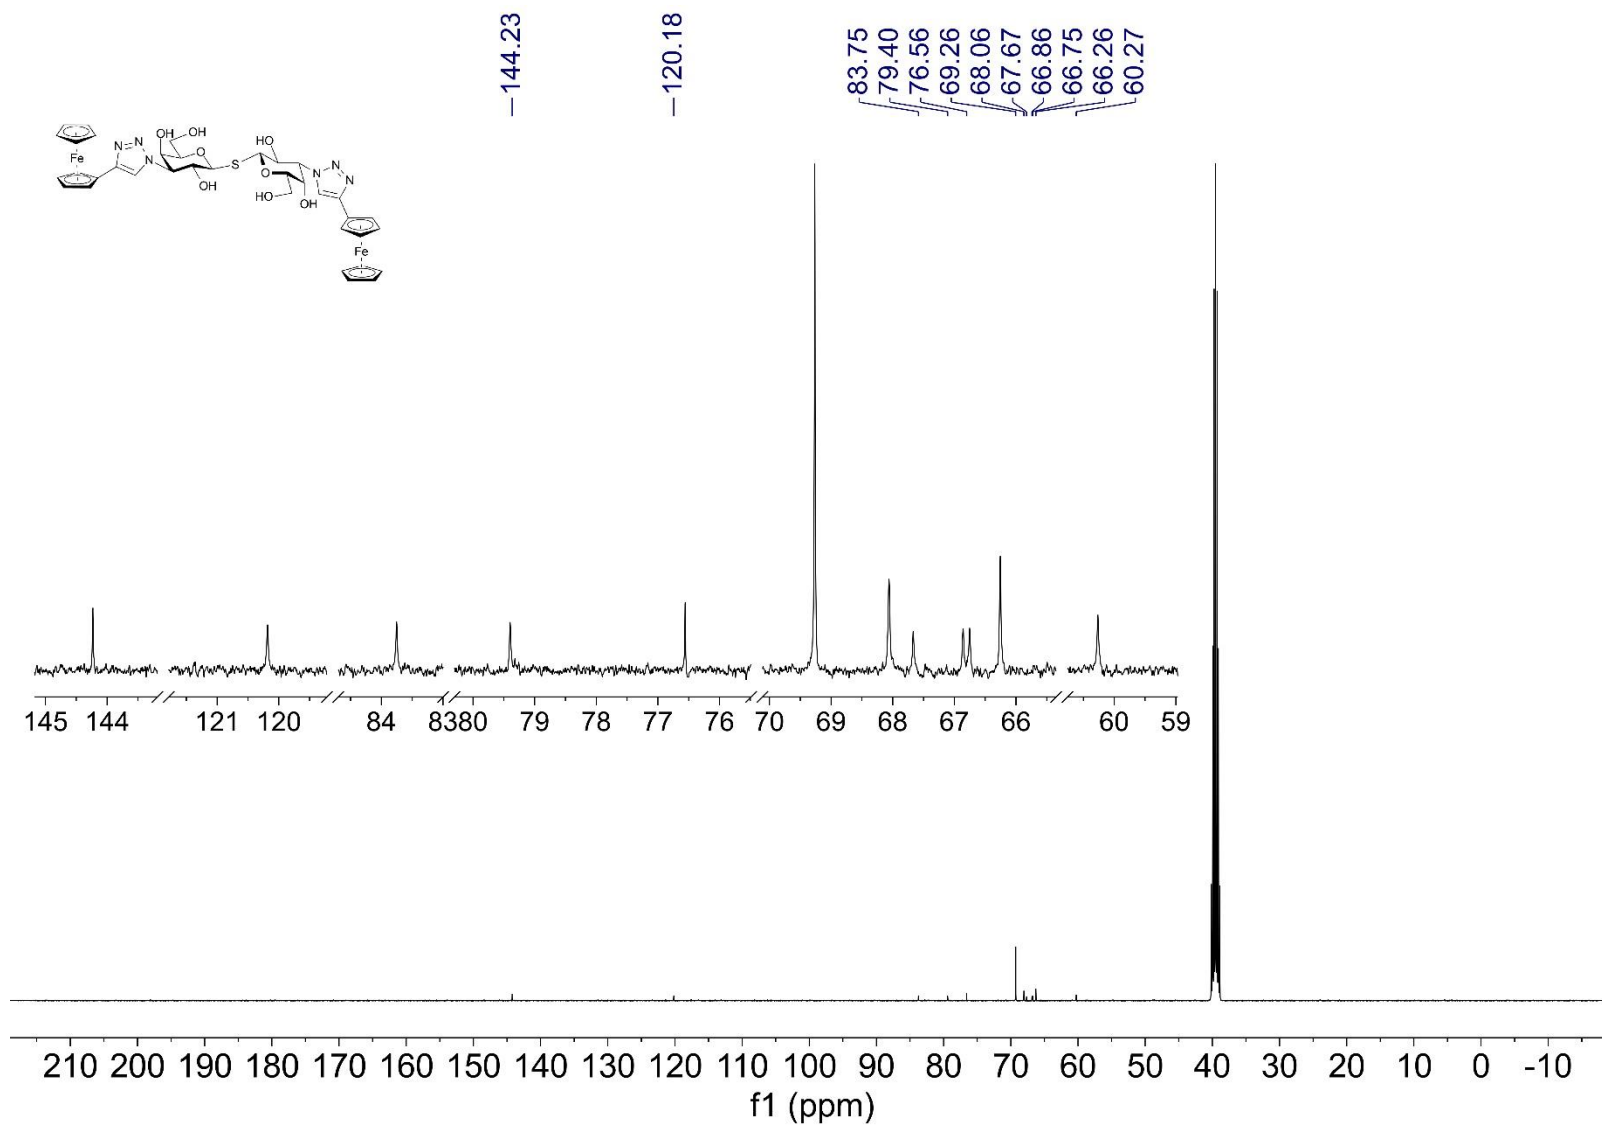

$^1\text{H}$ - $^1\text{H}$  COSY 36

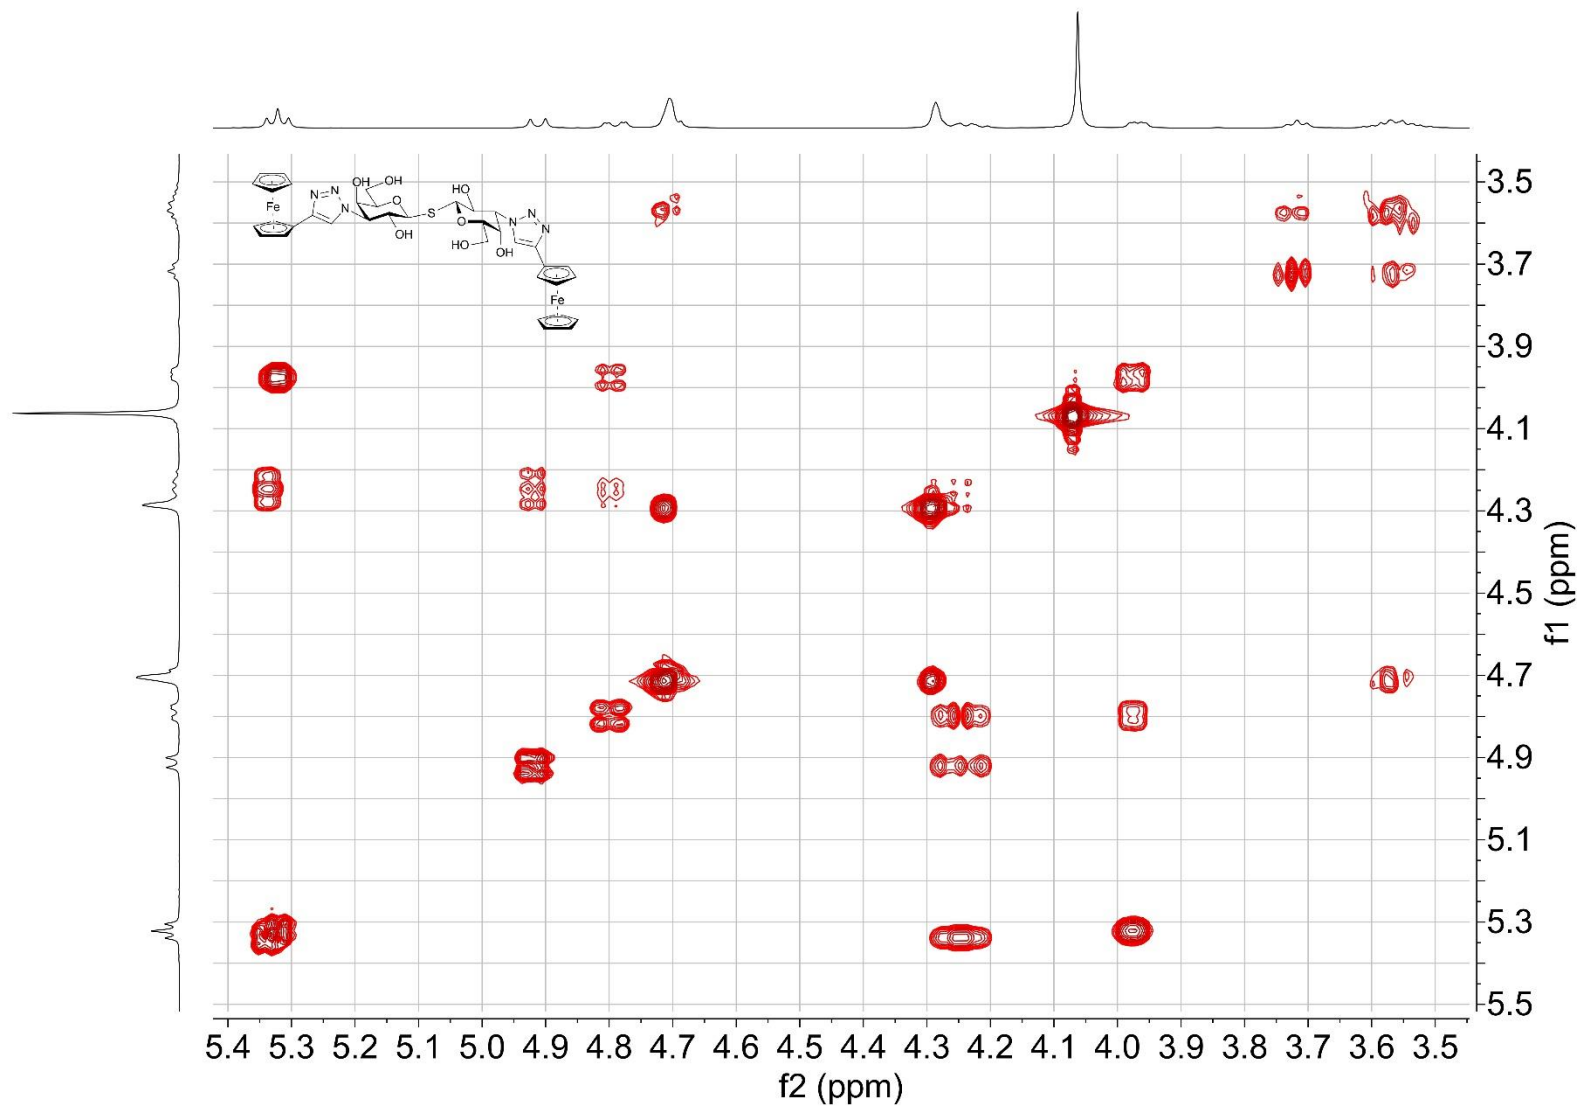

$^1\text{H}$ - $^{13}\text{C}$  HSQC 36

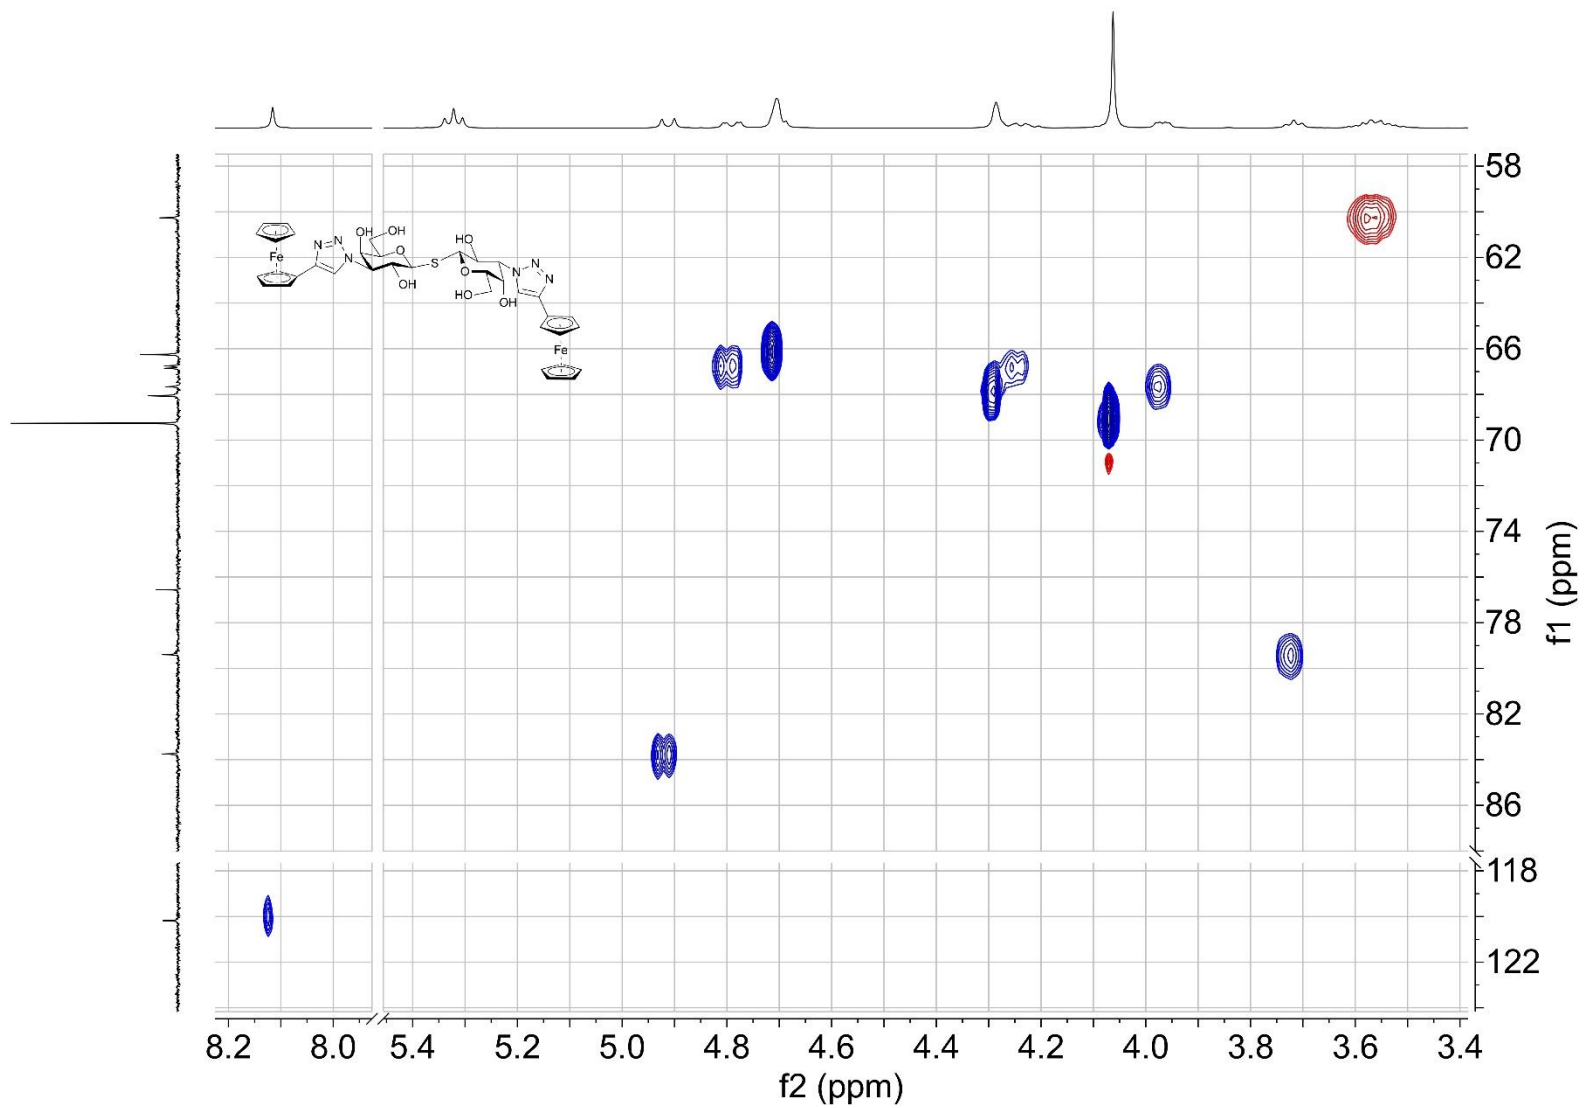

$^1\text{H}$ - $^{13}\text{C}$  HMBC 36

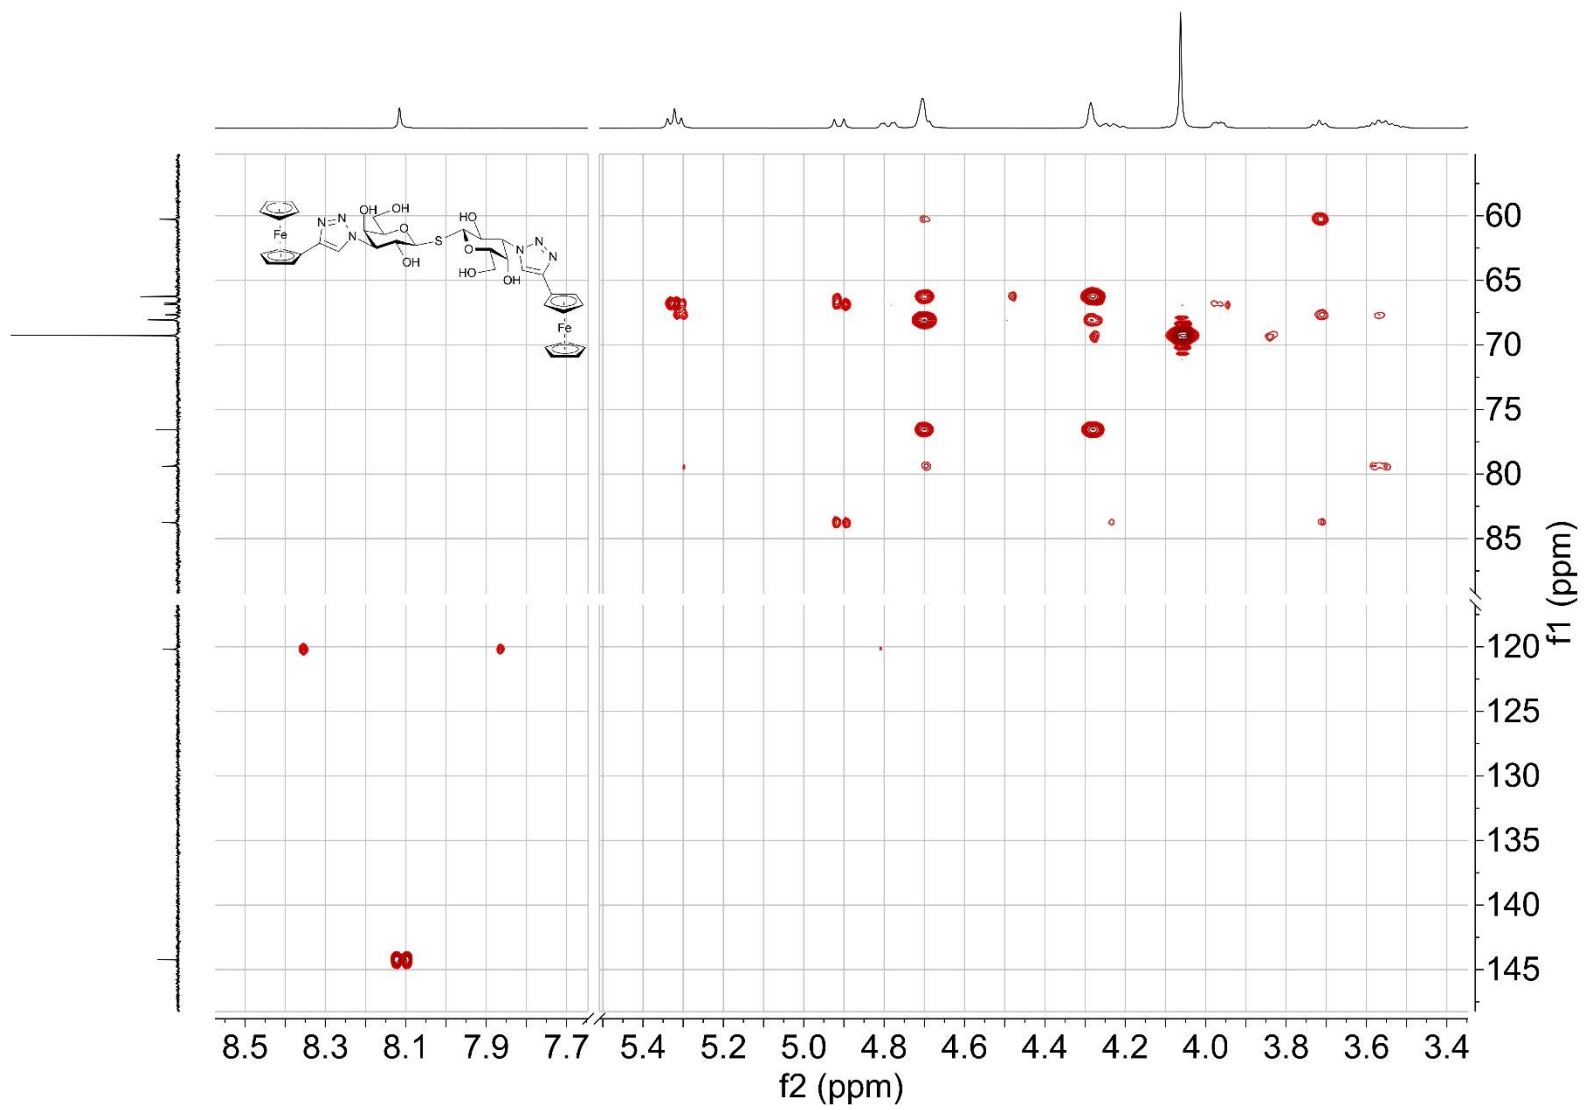



# NMR COMPOUND 37

<sup>1</sup>H NMR (400 MHz, DMSO-d<sub>6</sub>) 37

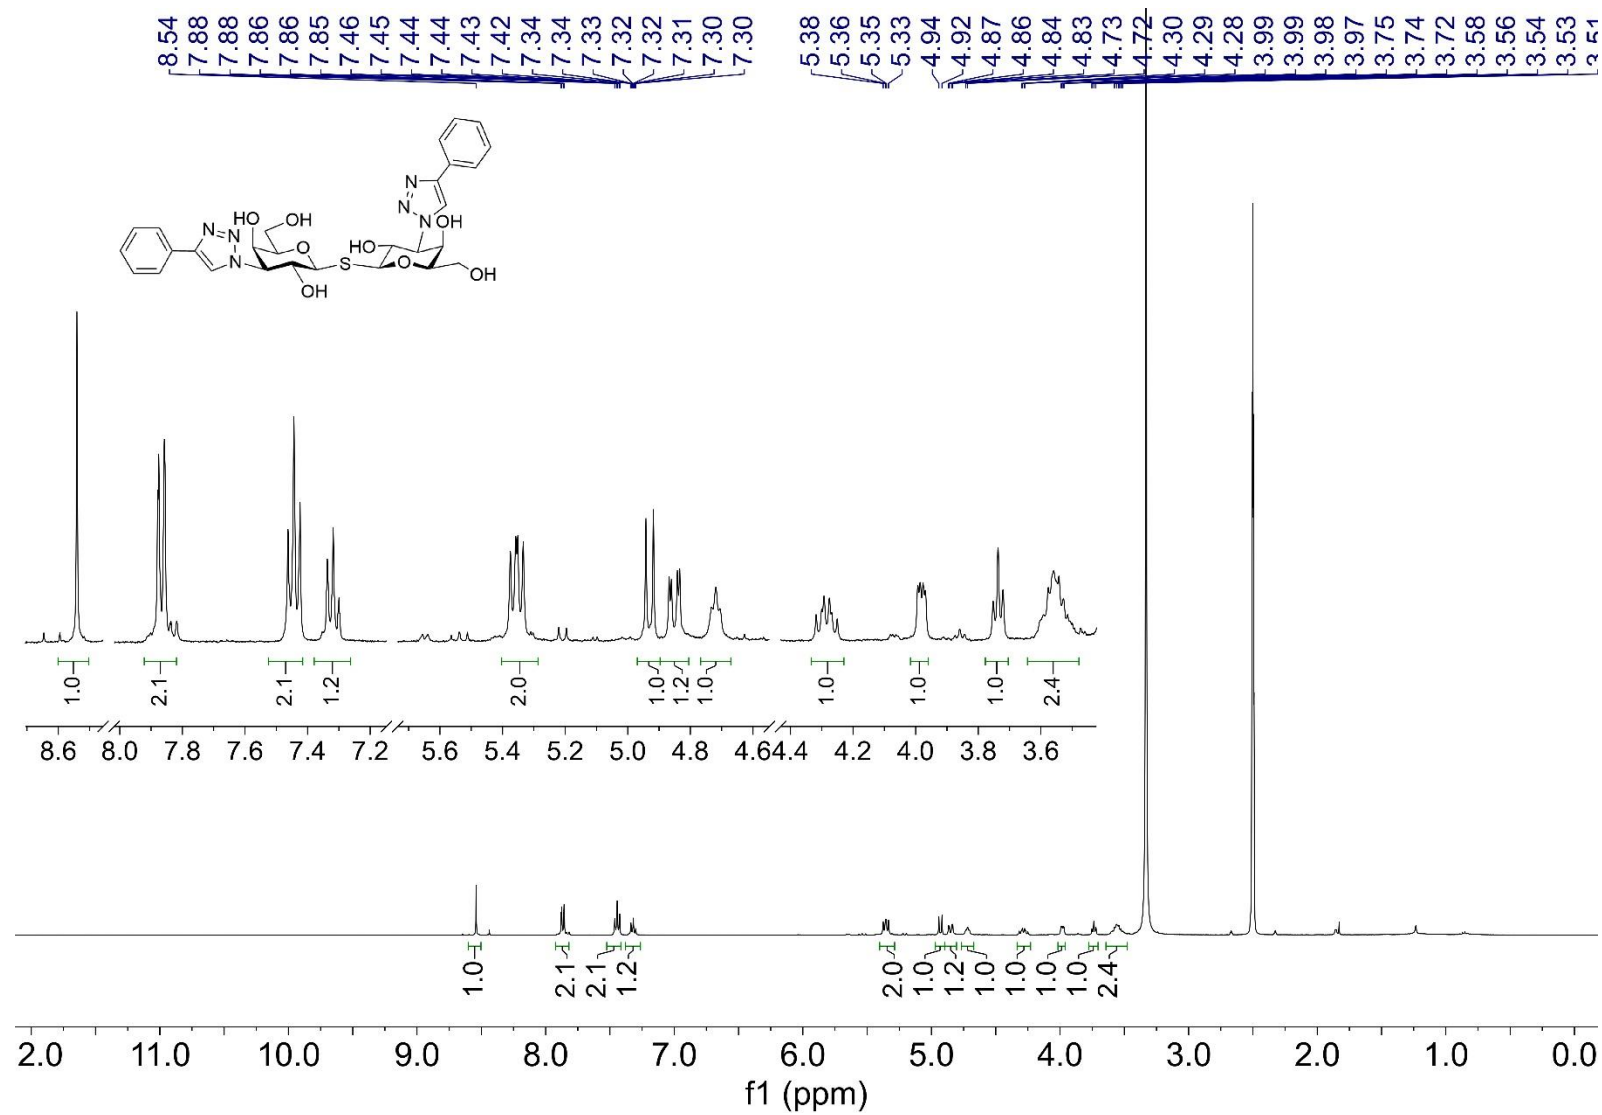

<sup>13</sup>C NMR (101 MHz, DMSO-*d*<sub>6</sub>) 37

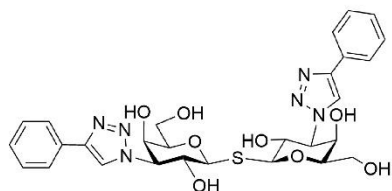

- 145.56
- 131.14
- 128.89
- 127.62
- 125.03
- 120.91
- 83.85
- 79.28
- 67.60
- 66.99
- 66.86
- 60.28

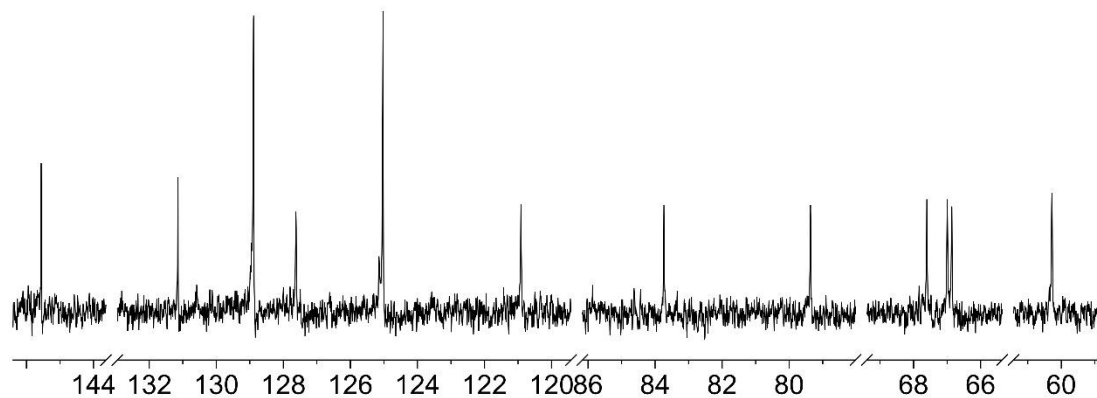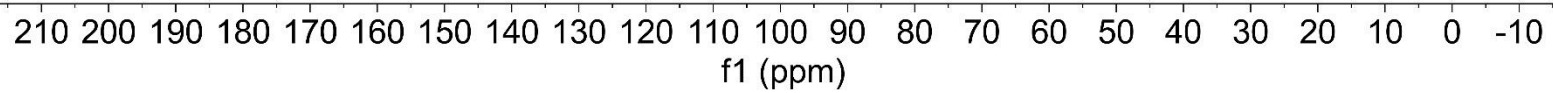

# NMR COMPOUND 38

## <sup>1</sup>H NMR (400 MHz, MeOD) 38

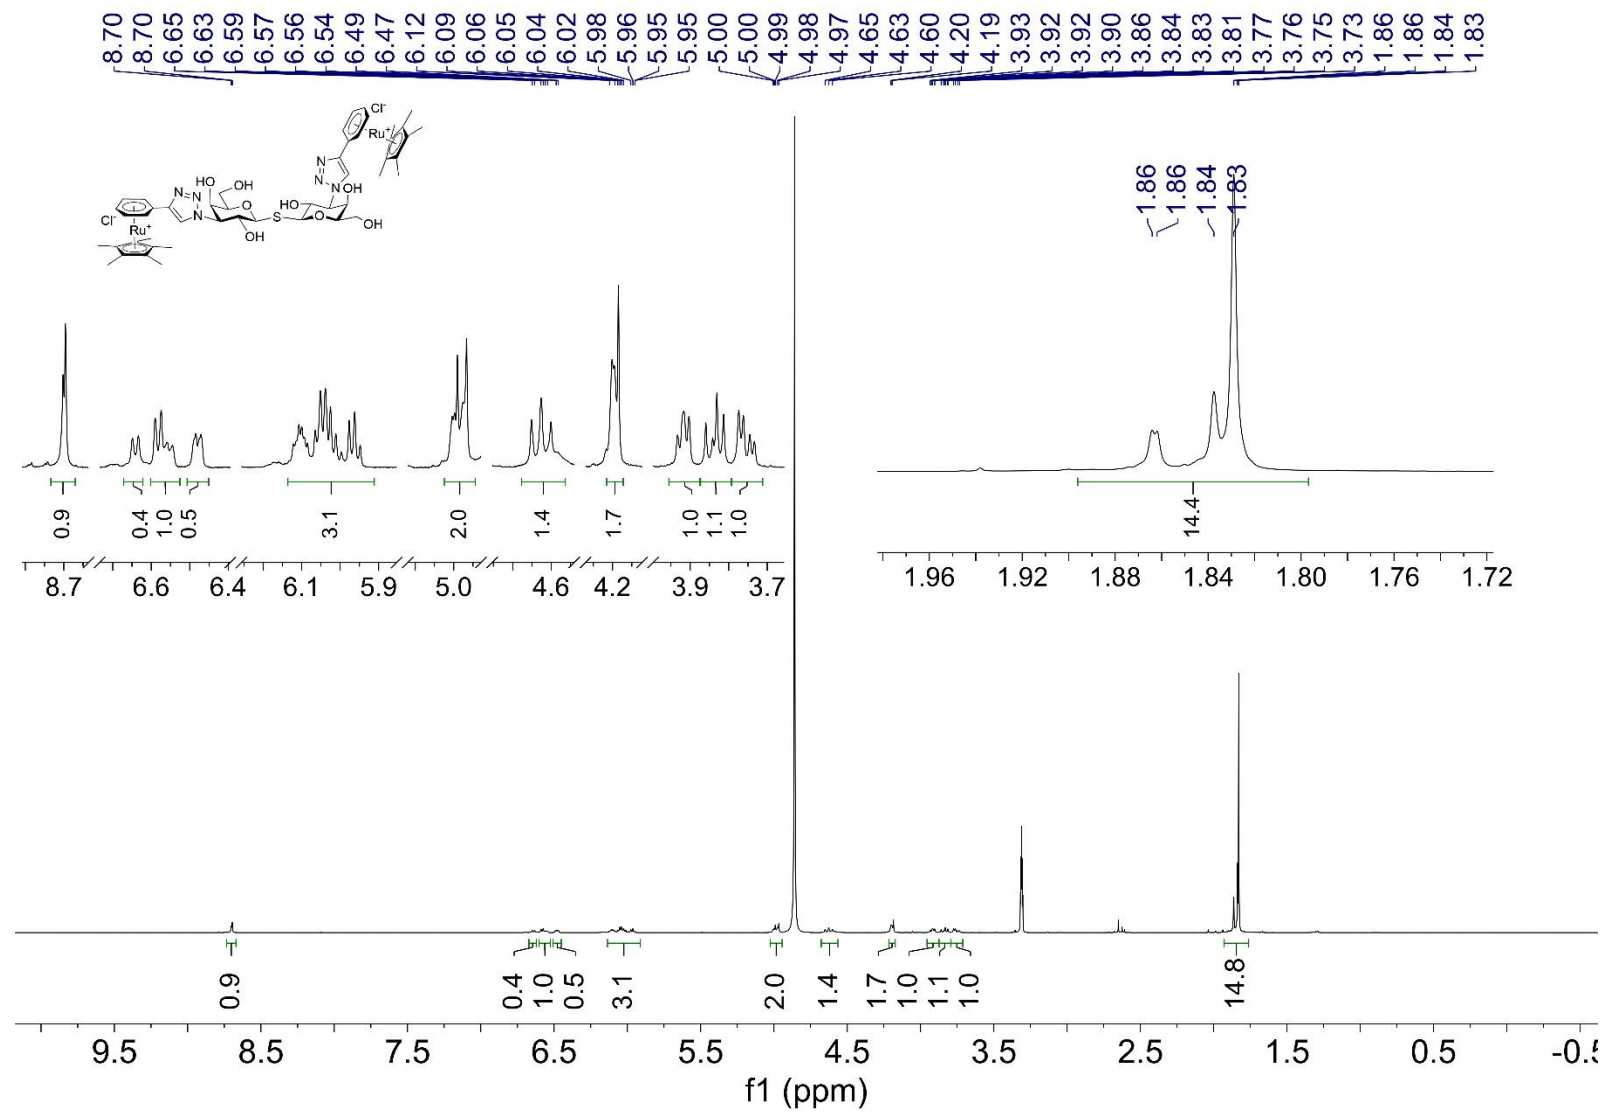

<sup>13</sup>C NMR (101 MHz, MeOD) 38

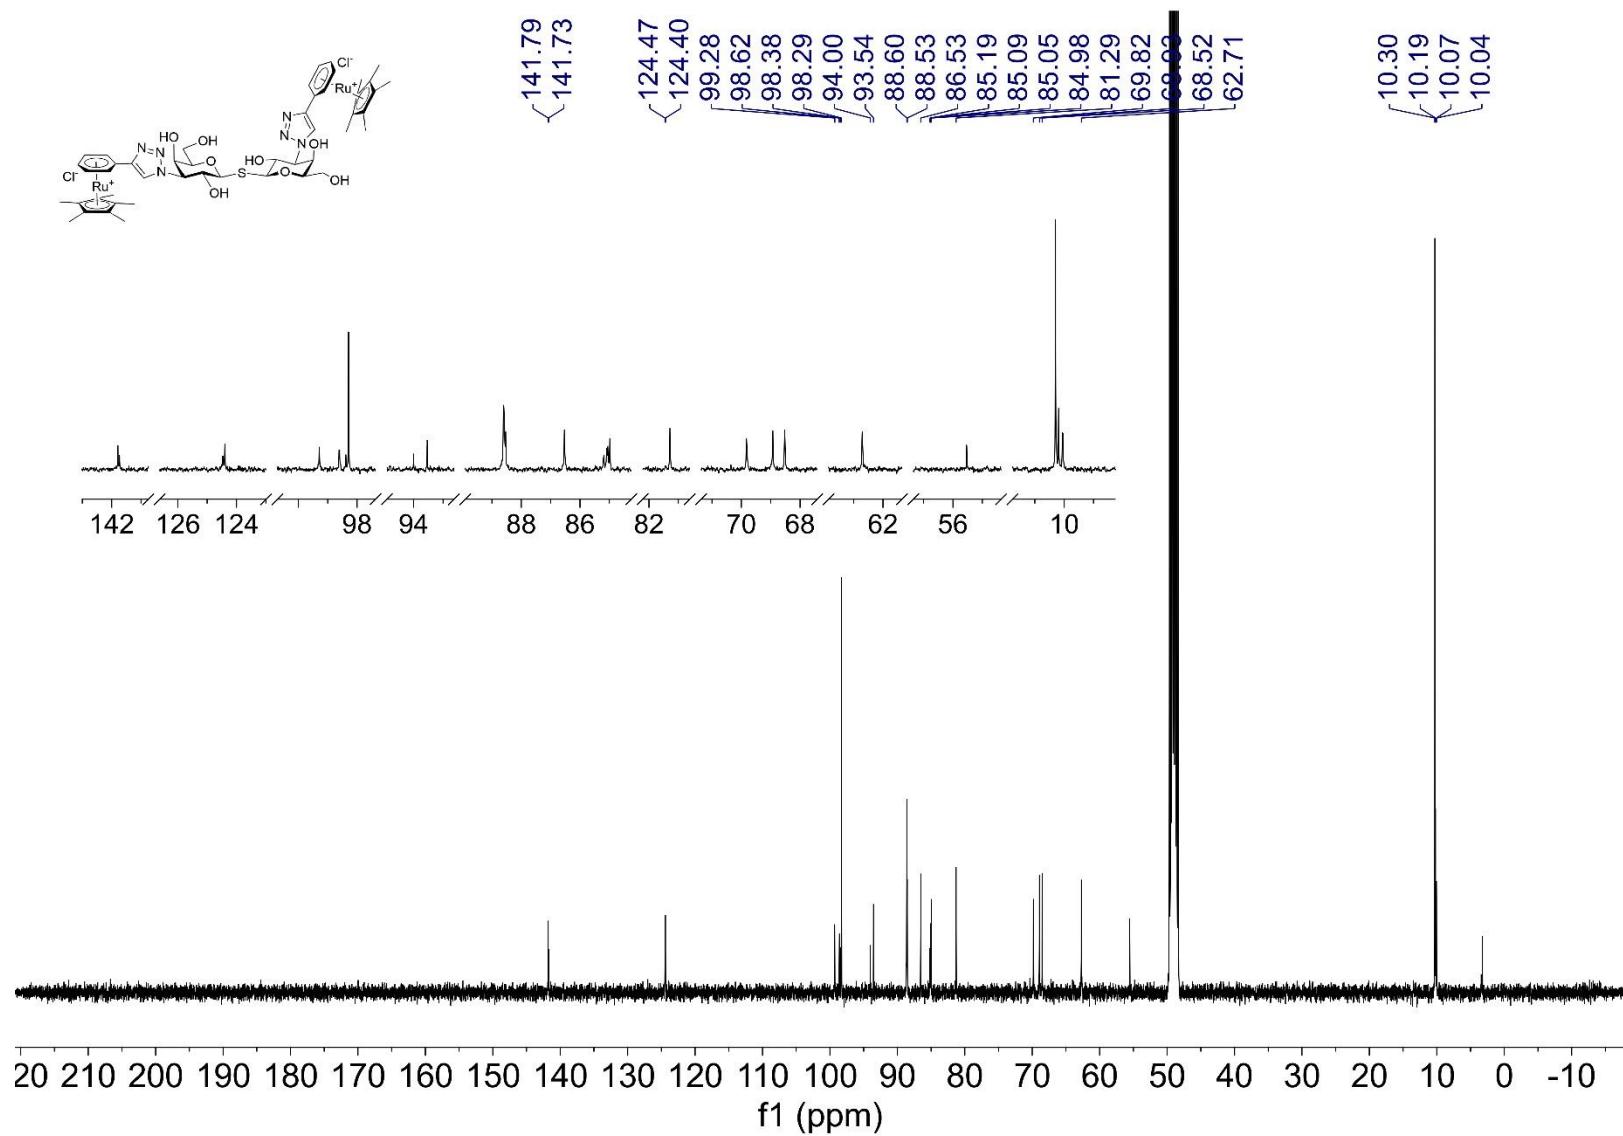

$^1\text{H}$ - $^1\text{H}$  COSY 38

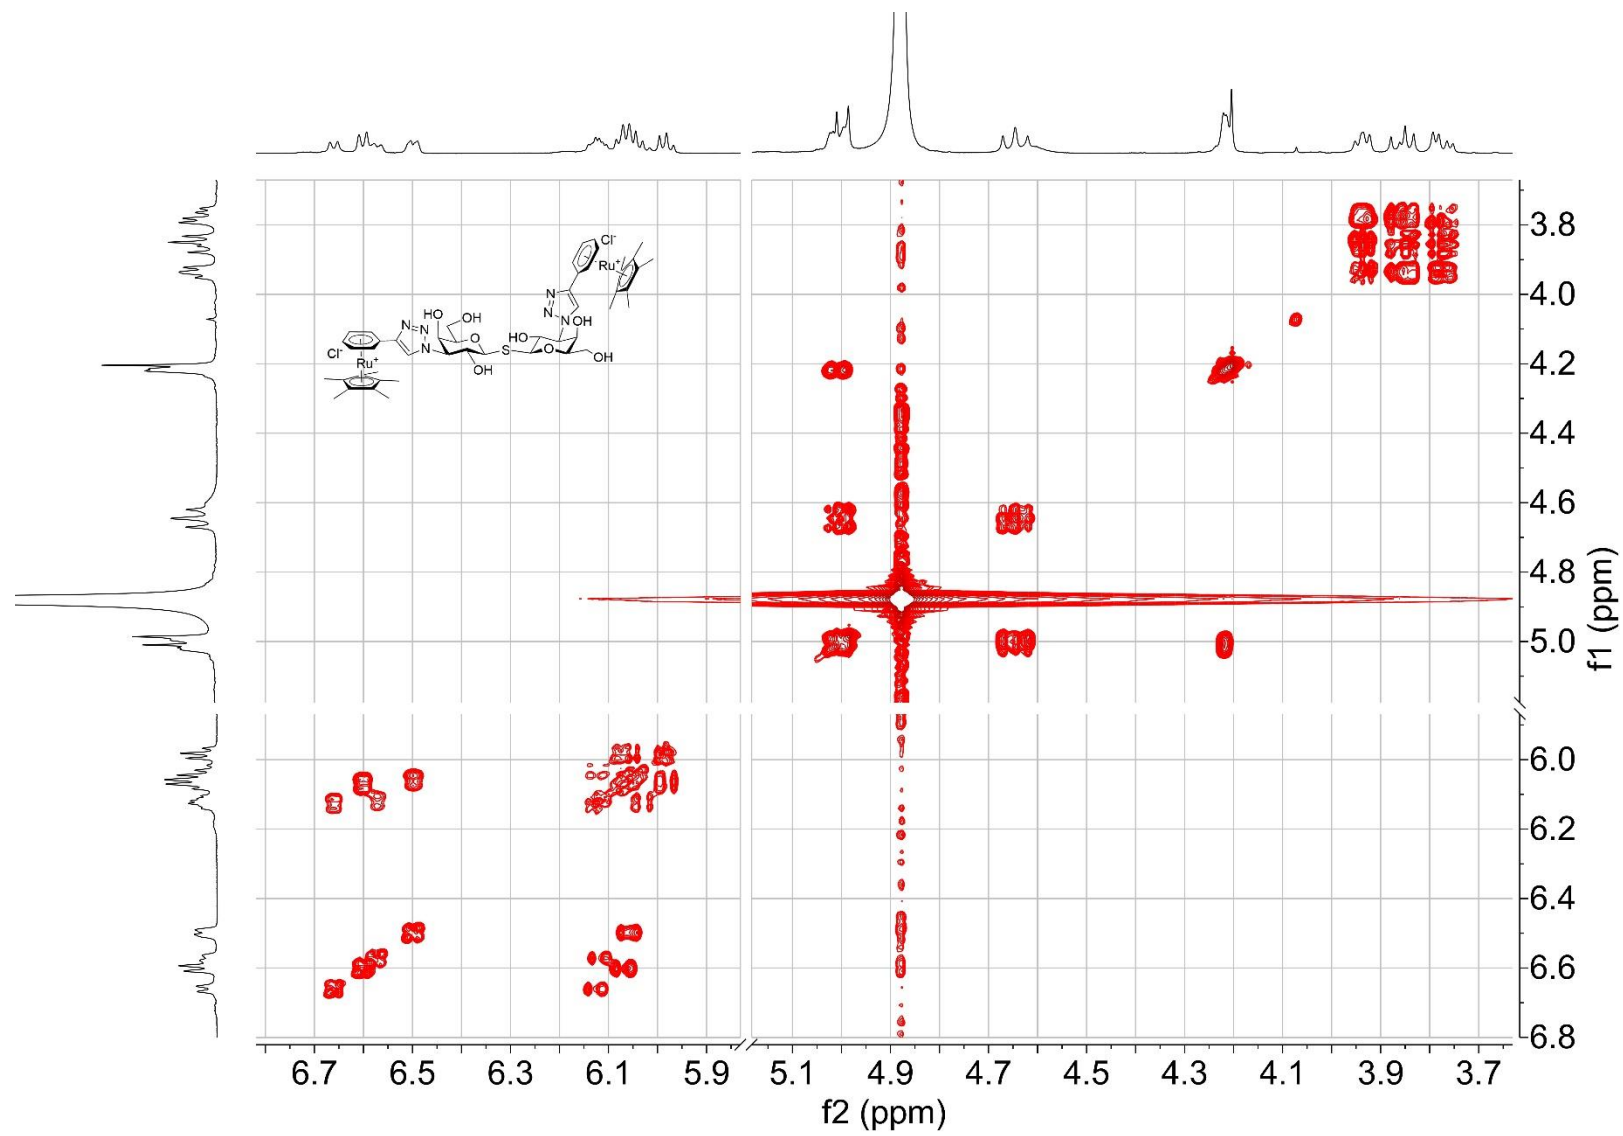

$^1\text{H}$ - $^{13}\text{C}$  HSQC 38

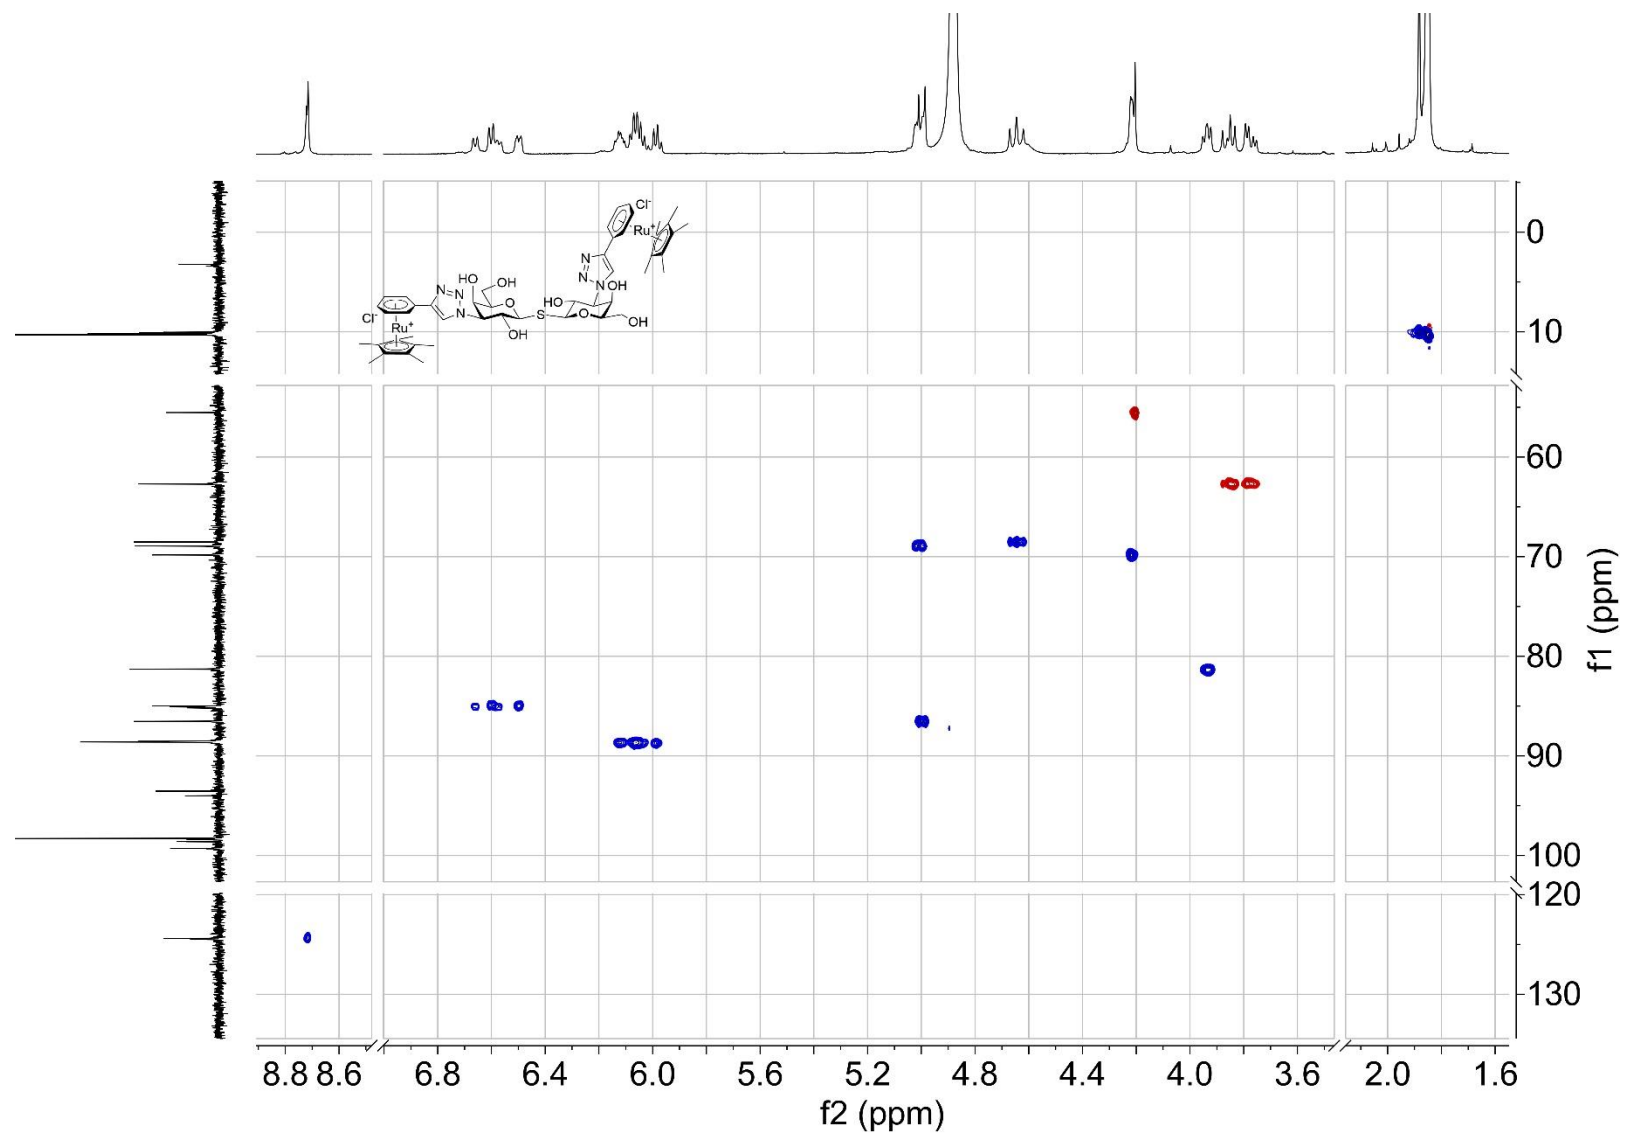

$^1\text{H}$ - $^{13}\text{C}$  HMBC 38

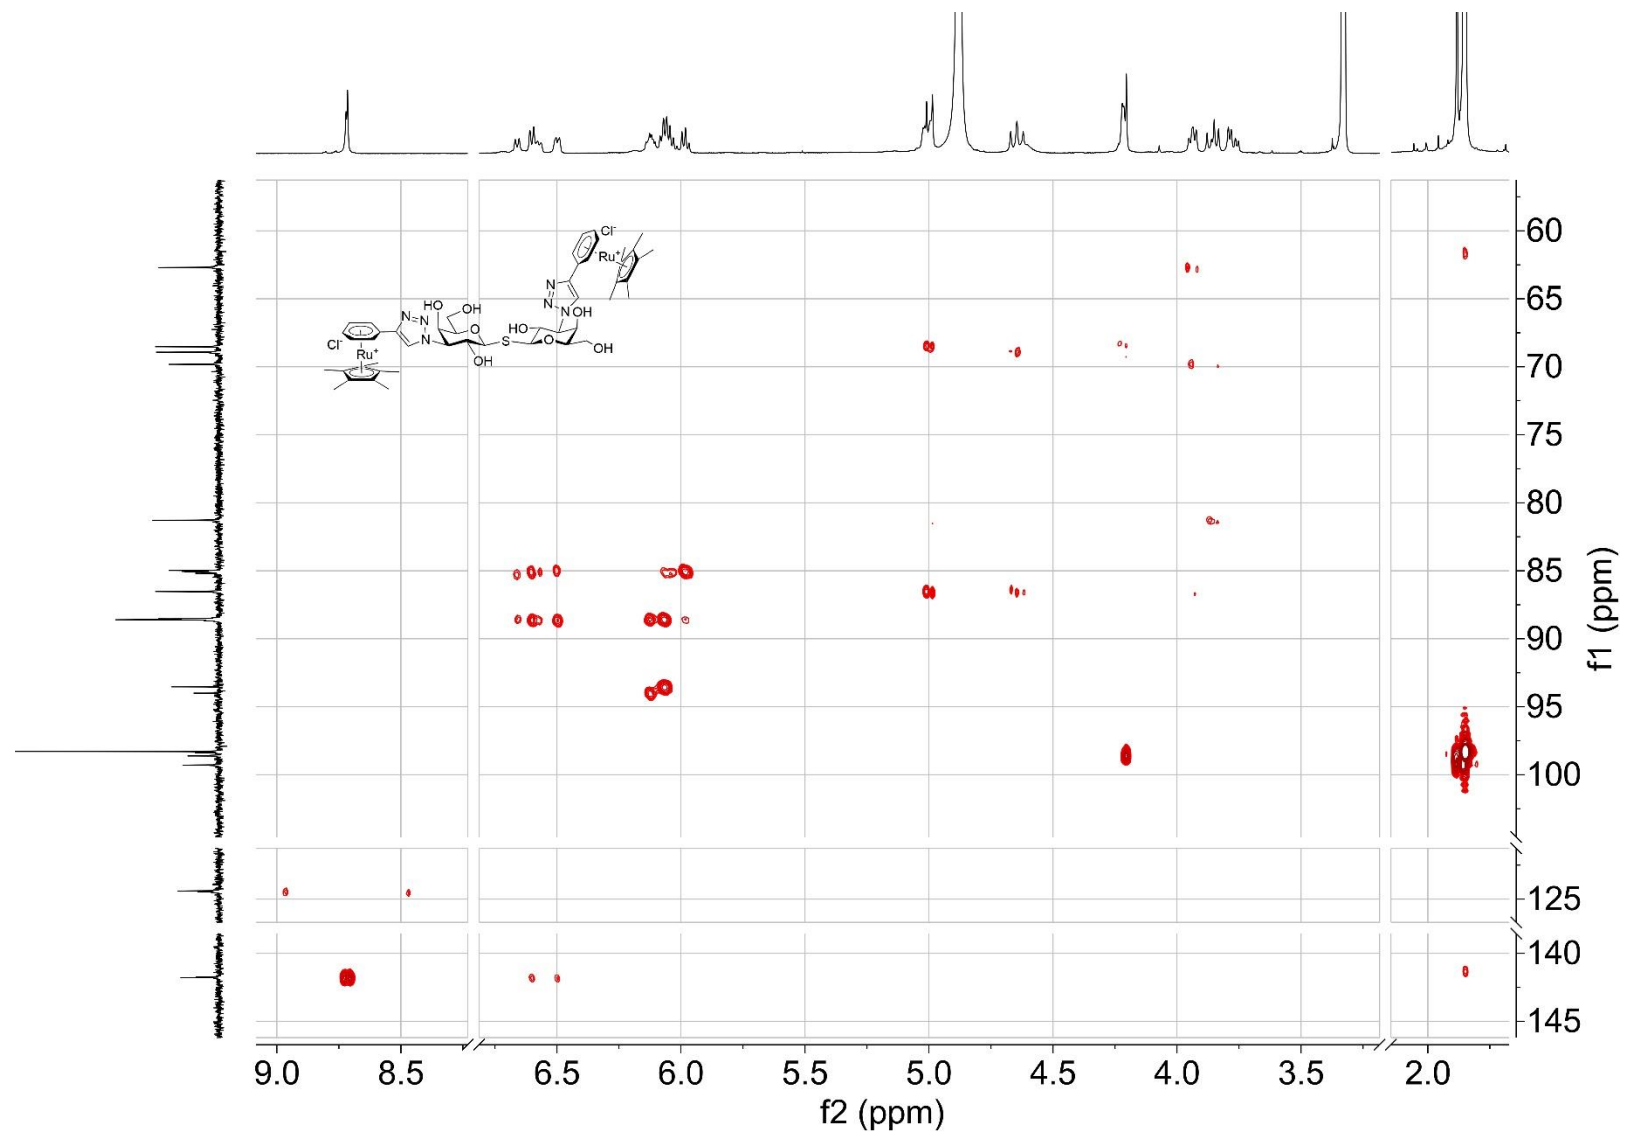

# NMR COMPOUND 41

## <sup>1</sup>H NMR (400 MHz, MeOD) 41

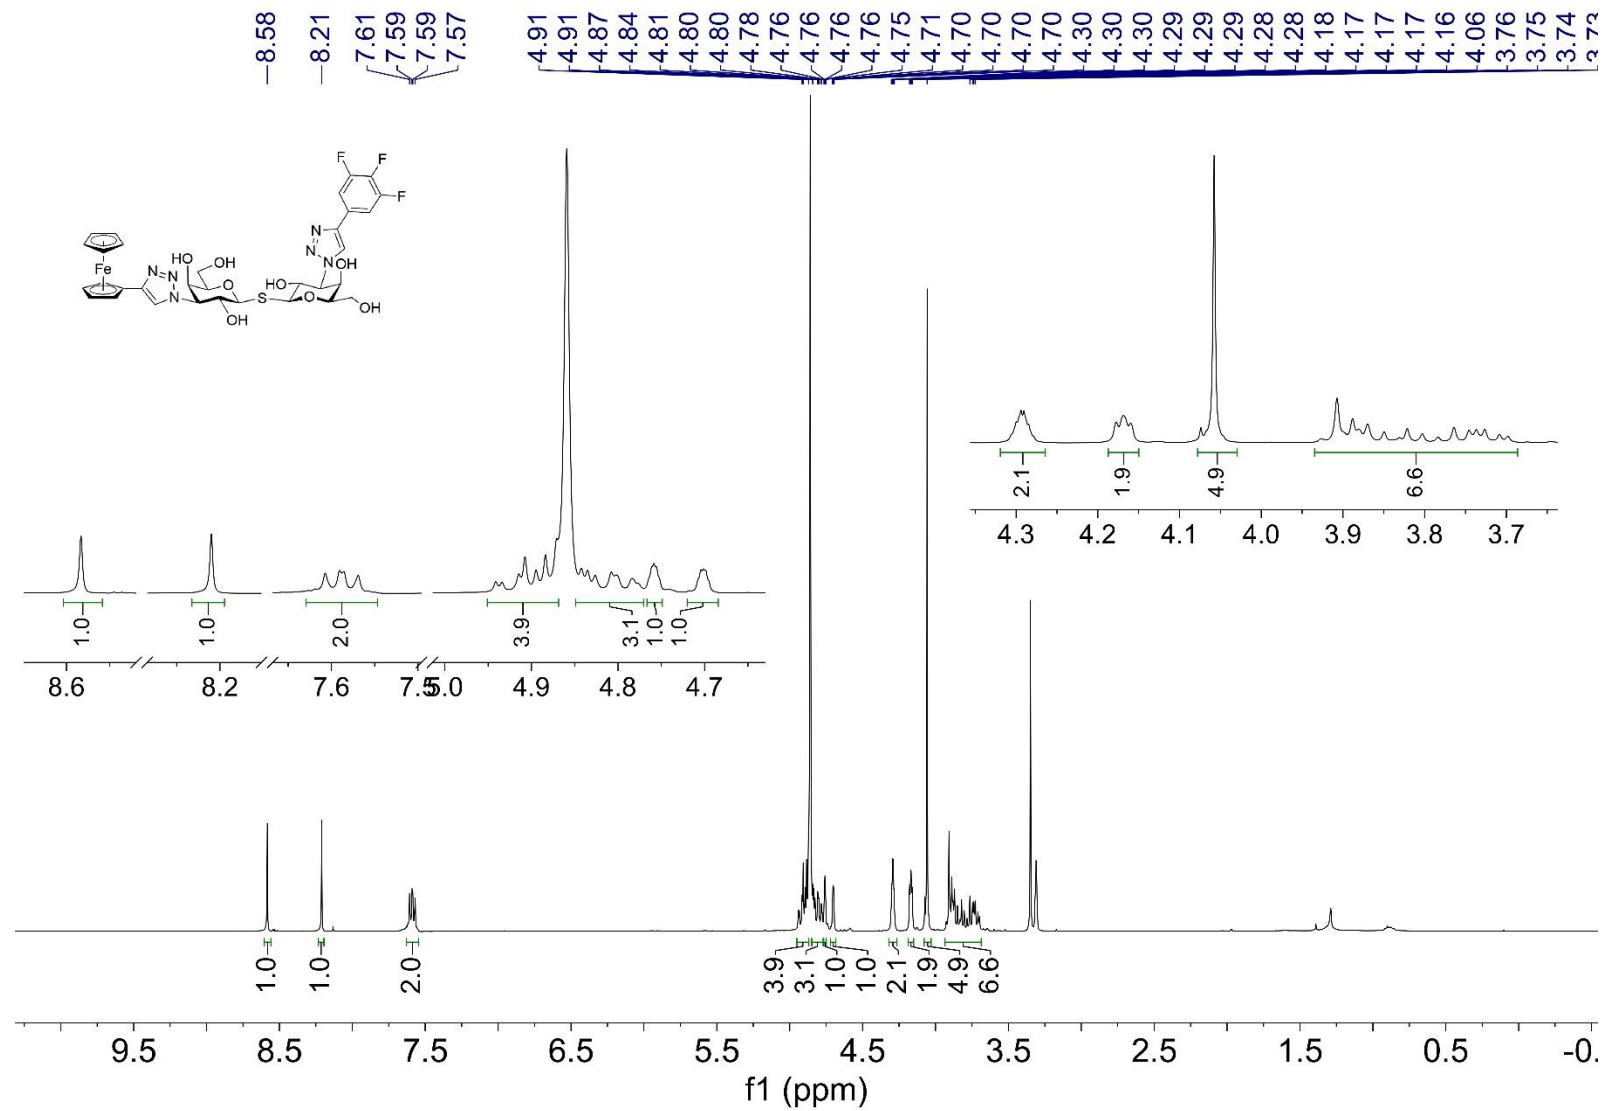



<sup>13</sup>C NMR (101 MHz, MeOD) 41

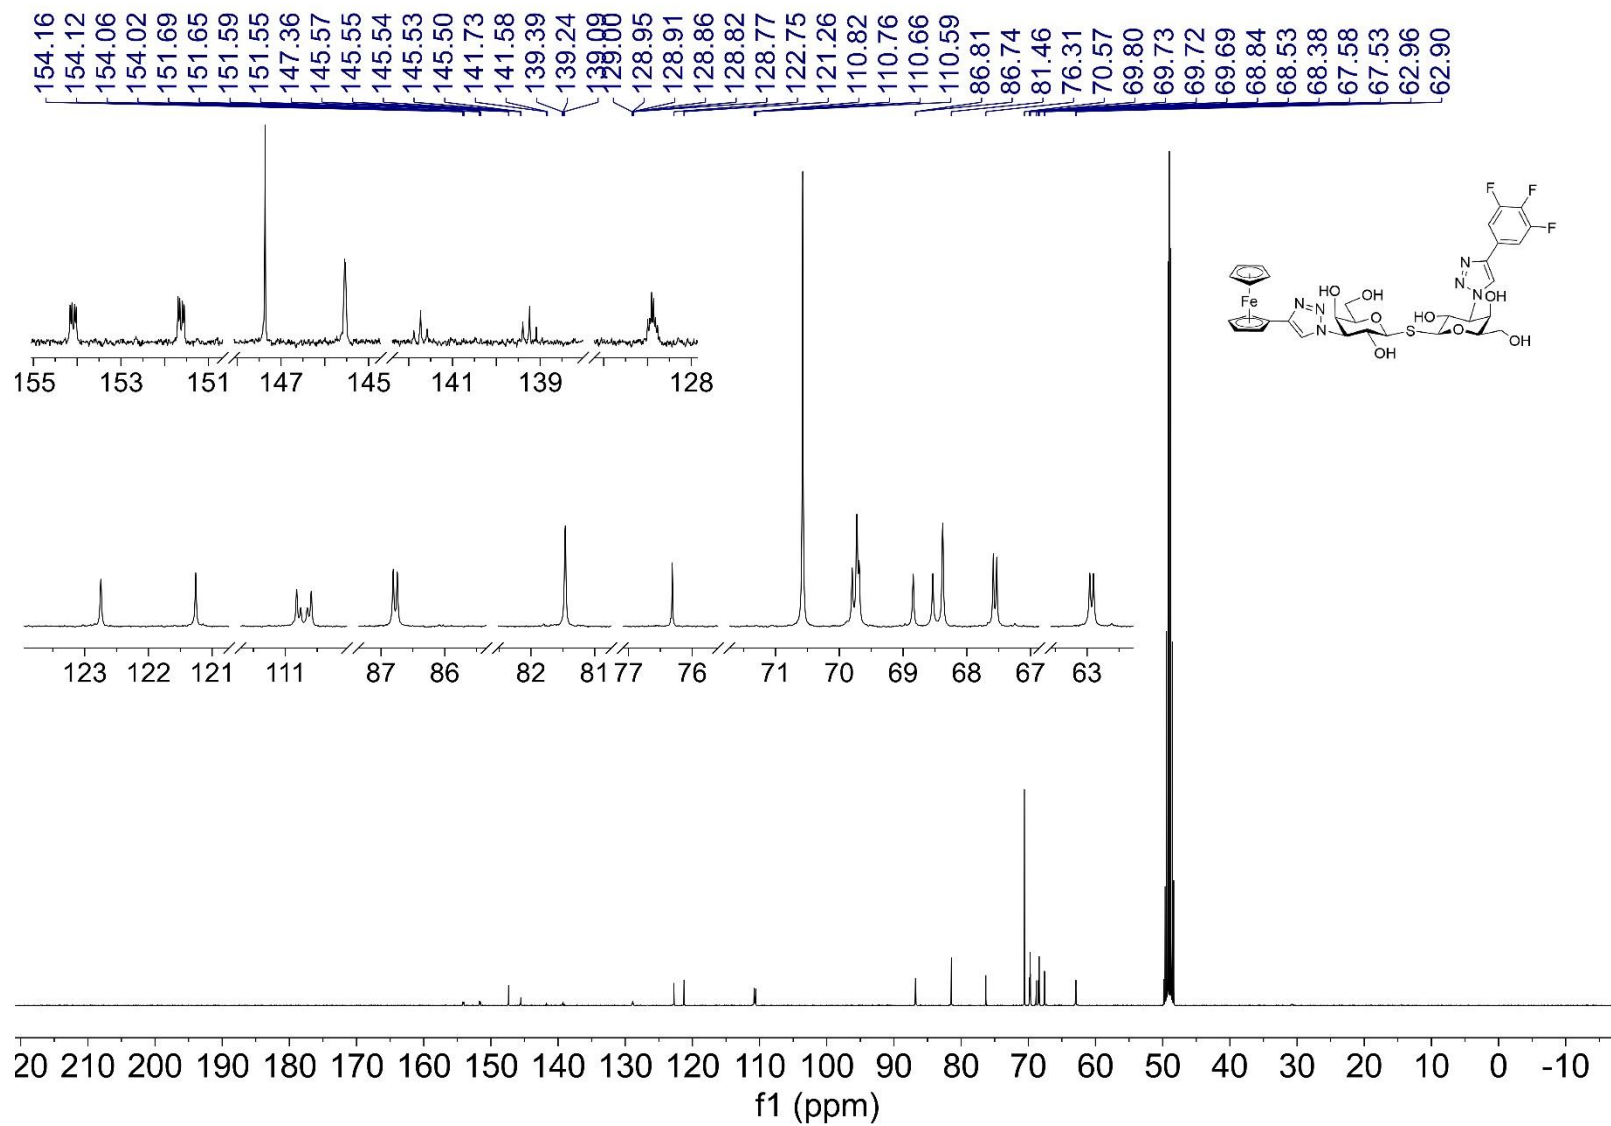

**<sup>19</sup>F NMR (376 MHz, MeOD) 41**

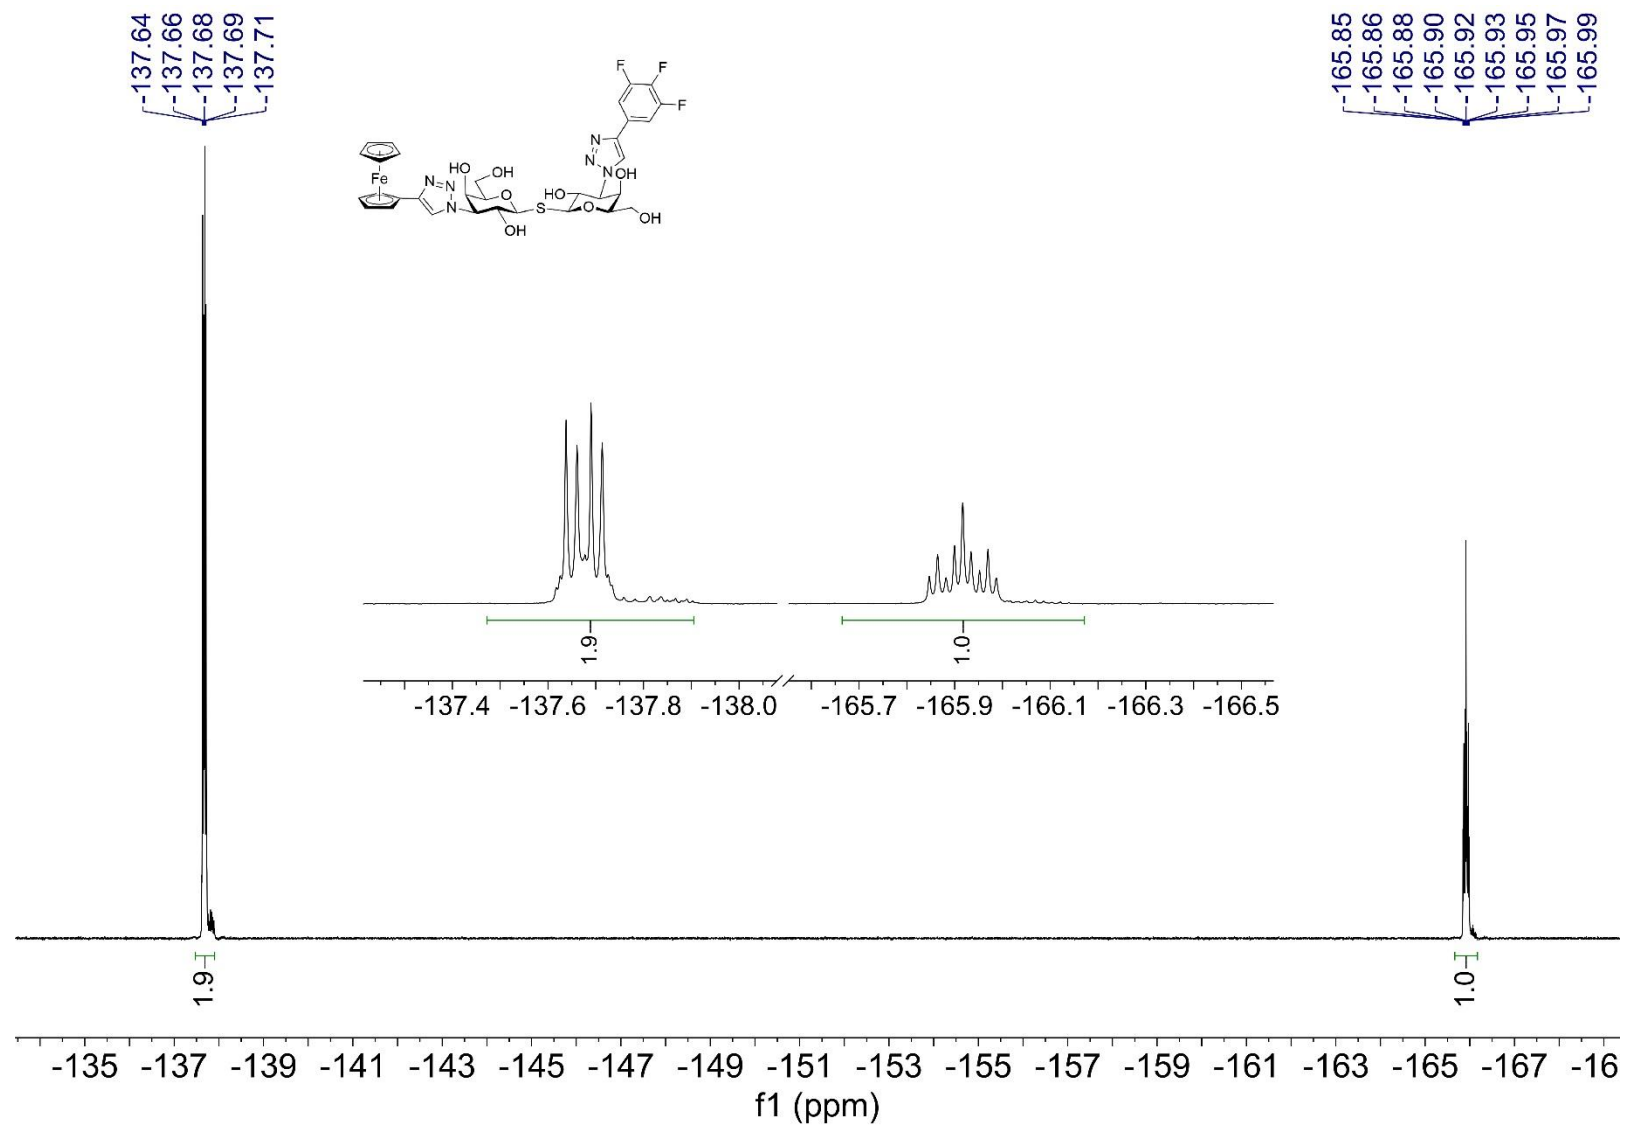

**<sup>1</sup>H-<sup>1</sup>H COSY 41**

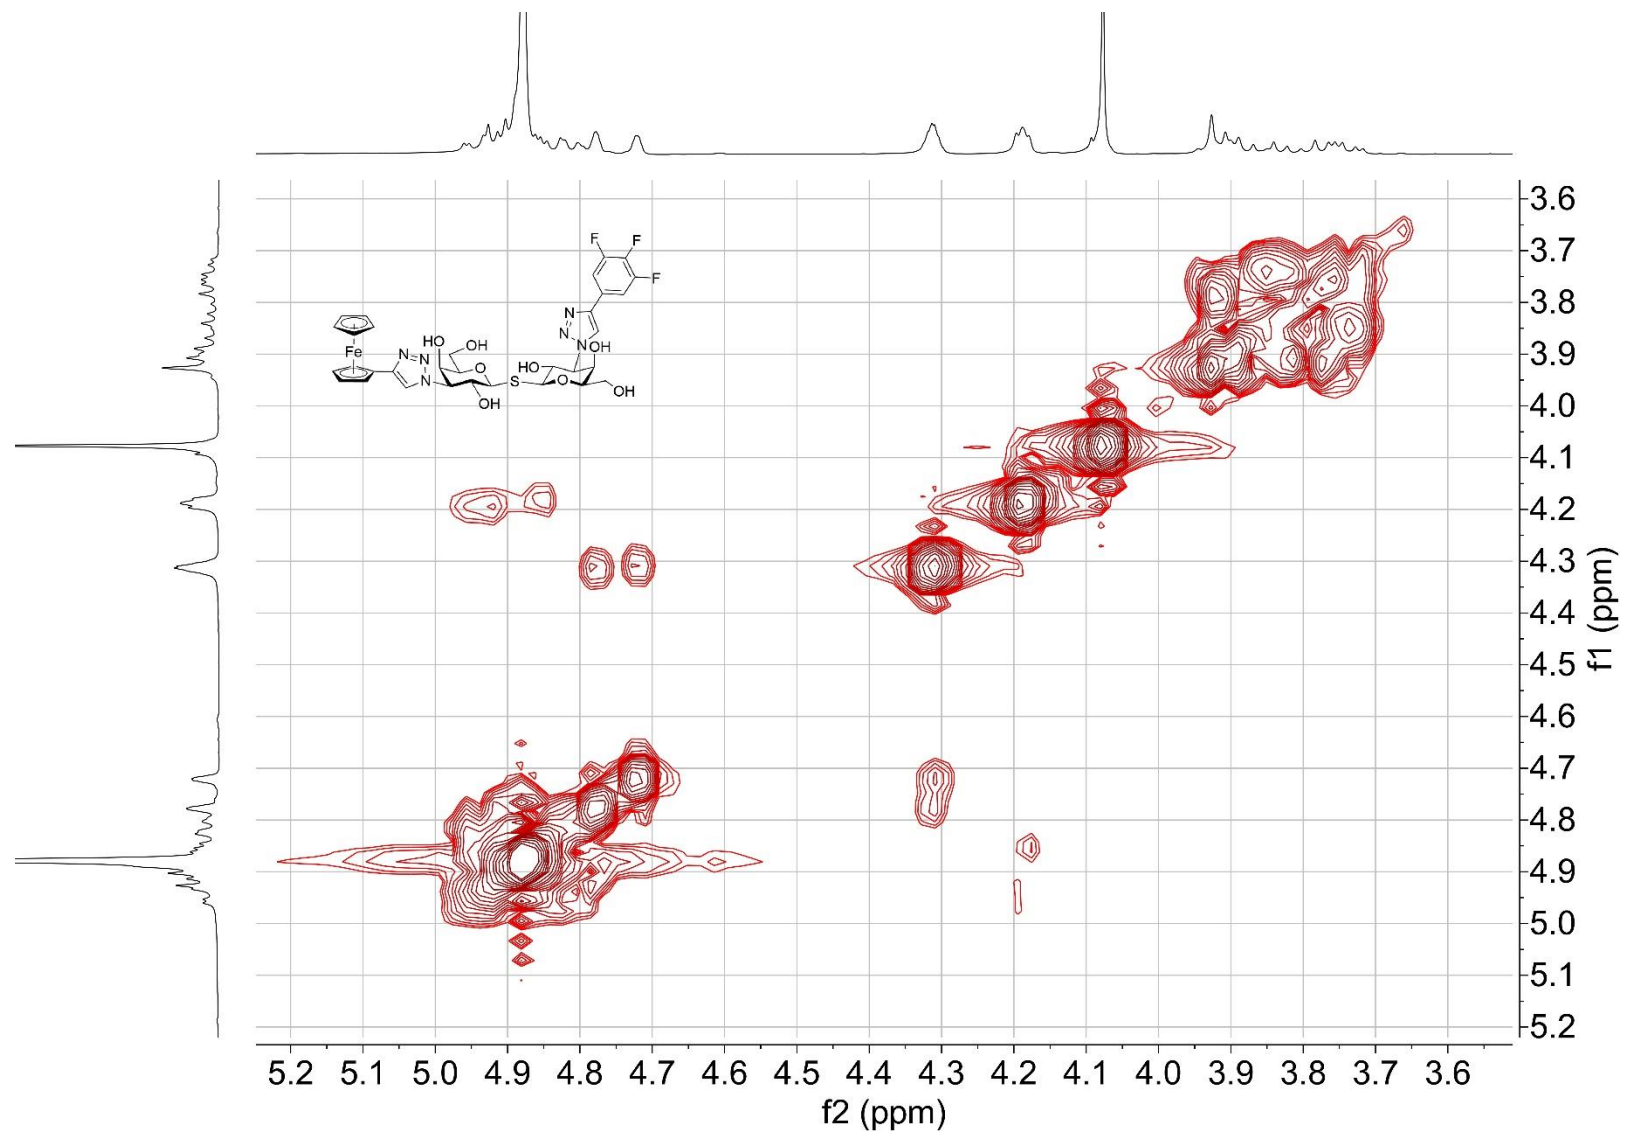

$^1\text{H}$ - $^{13}\text{C}$  HSQC 41

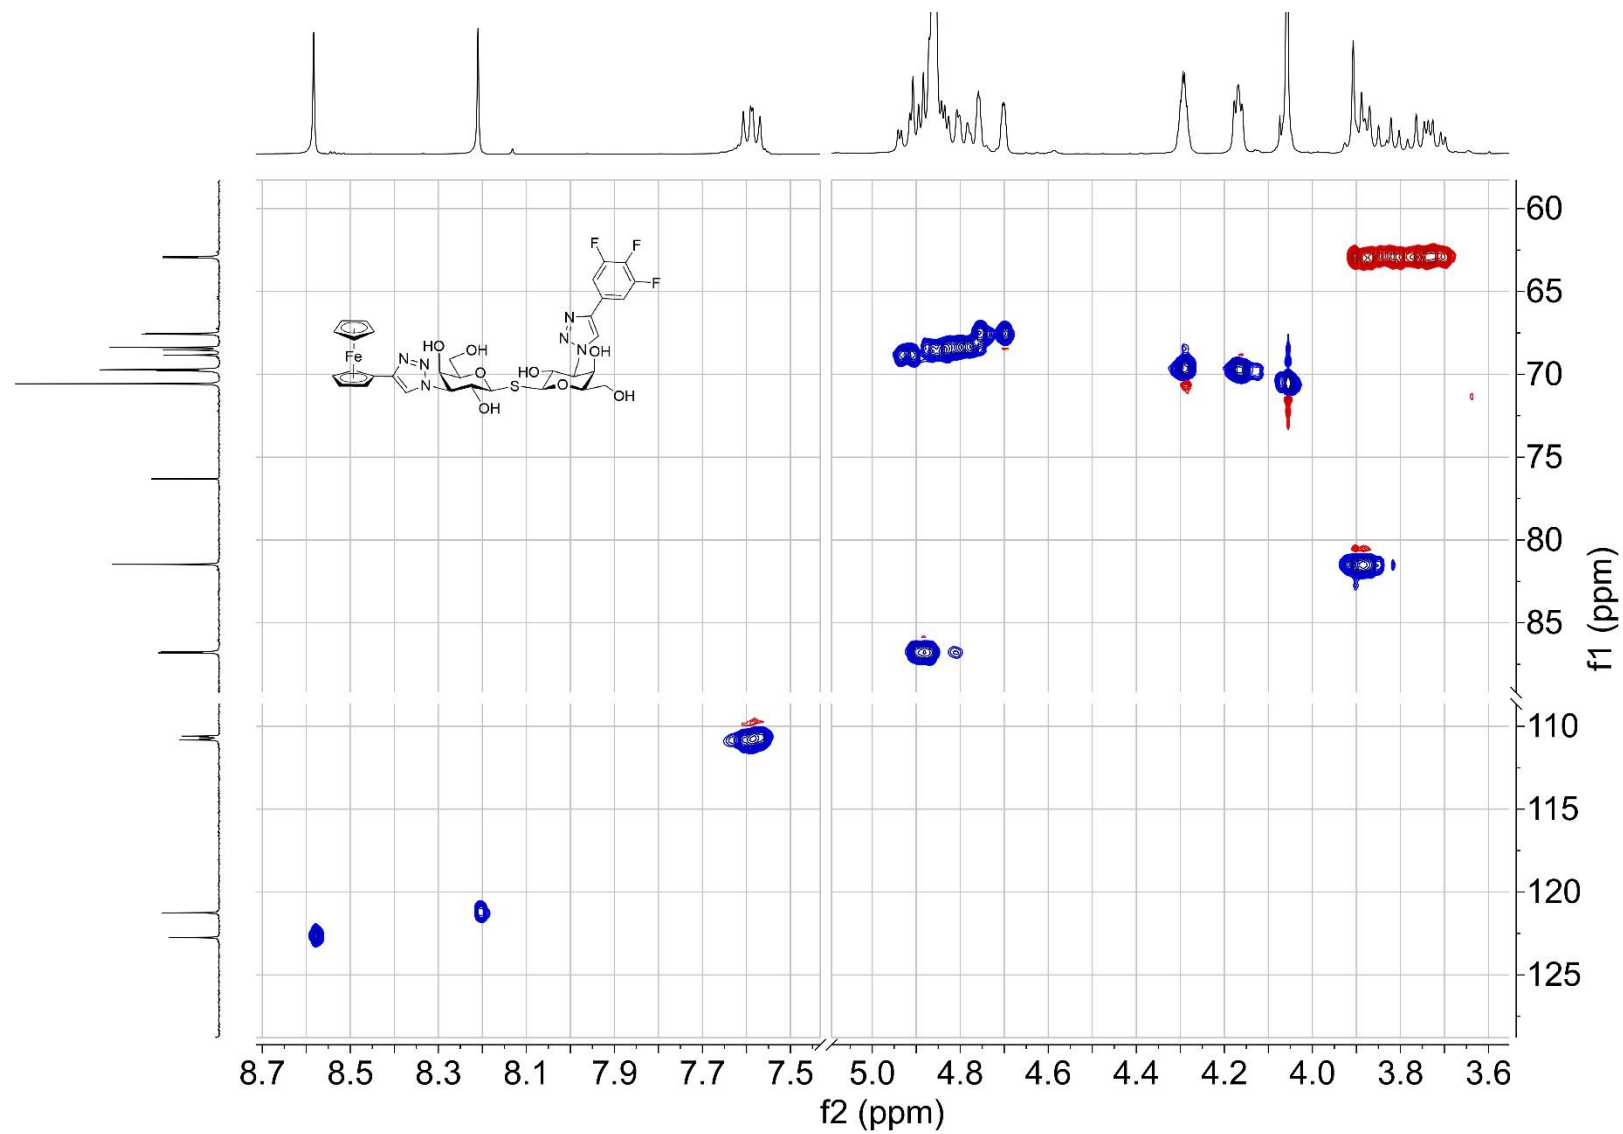

$^1\text{H}$ - $^{13}\text{C}$  HMBC 41

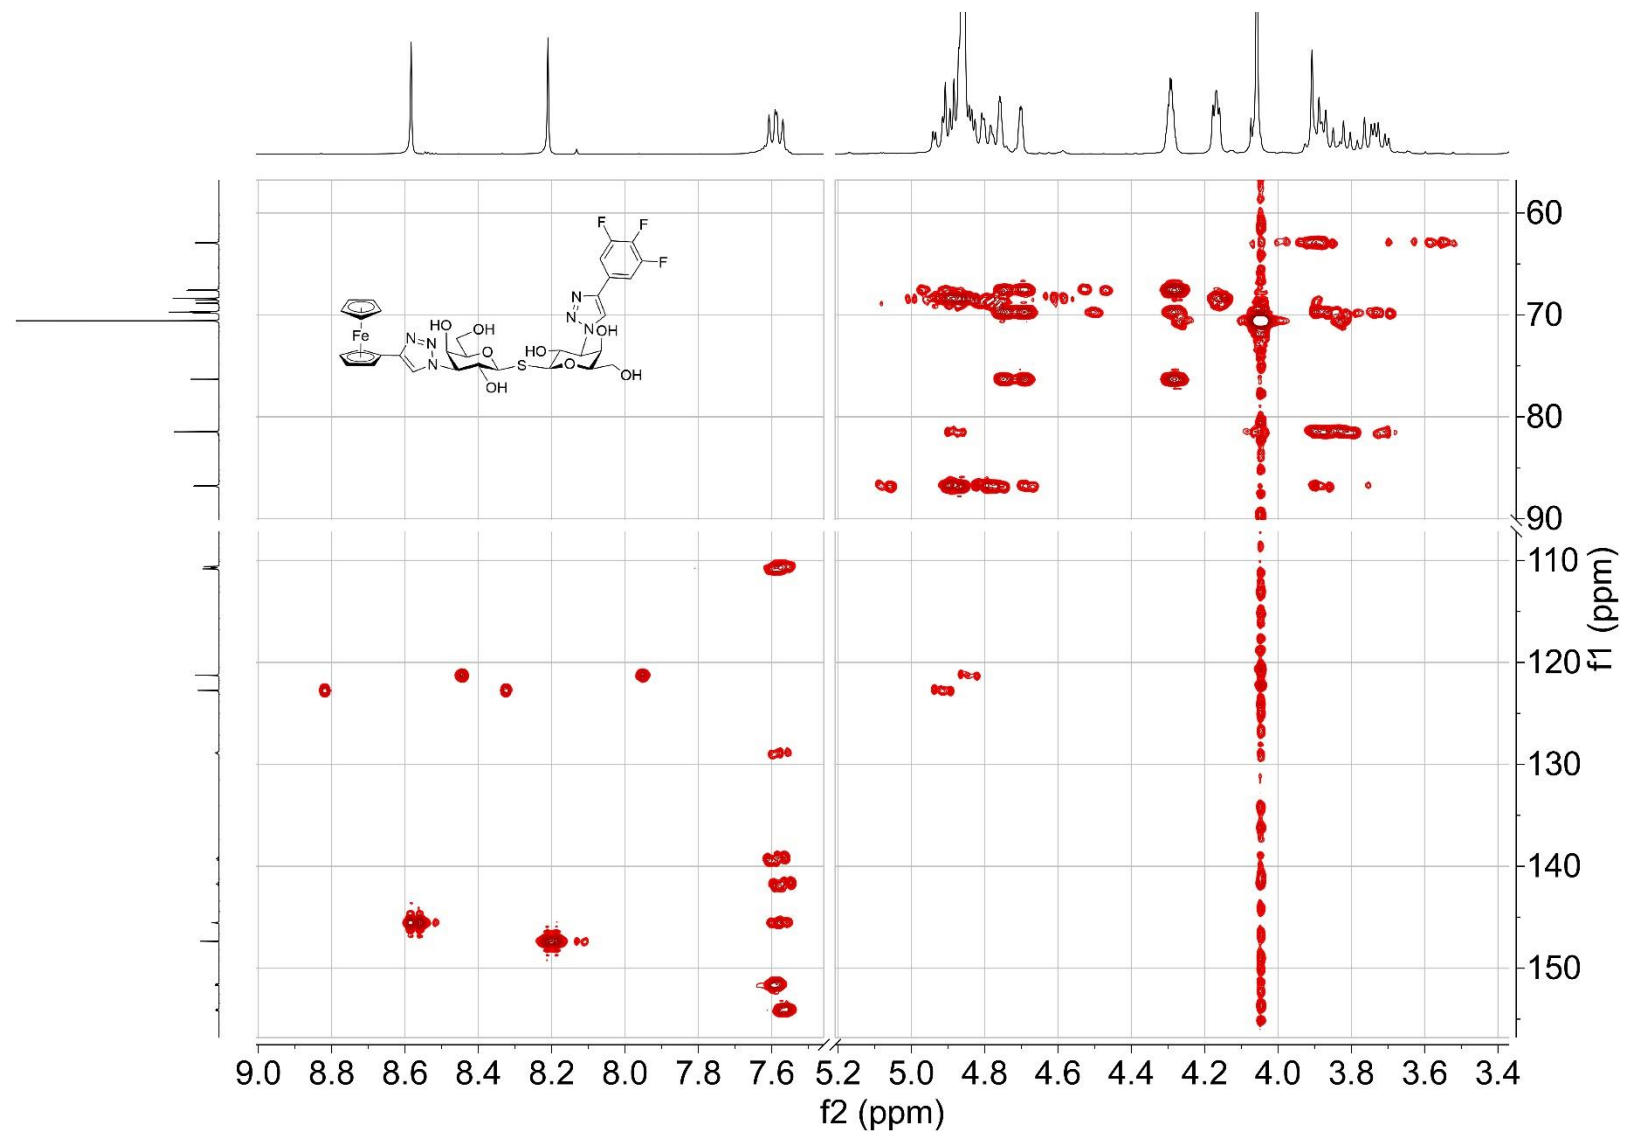

<sup>1</sup>H-<sup>13</sup>C HSQCTOCSY 41

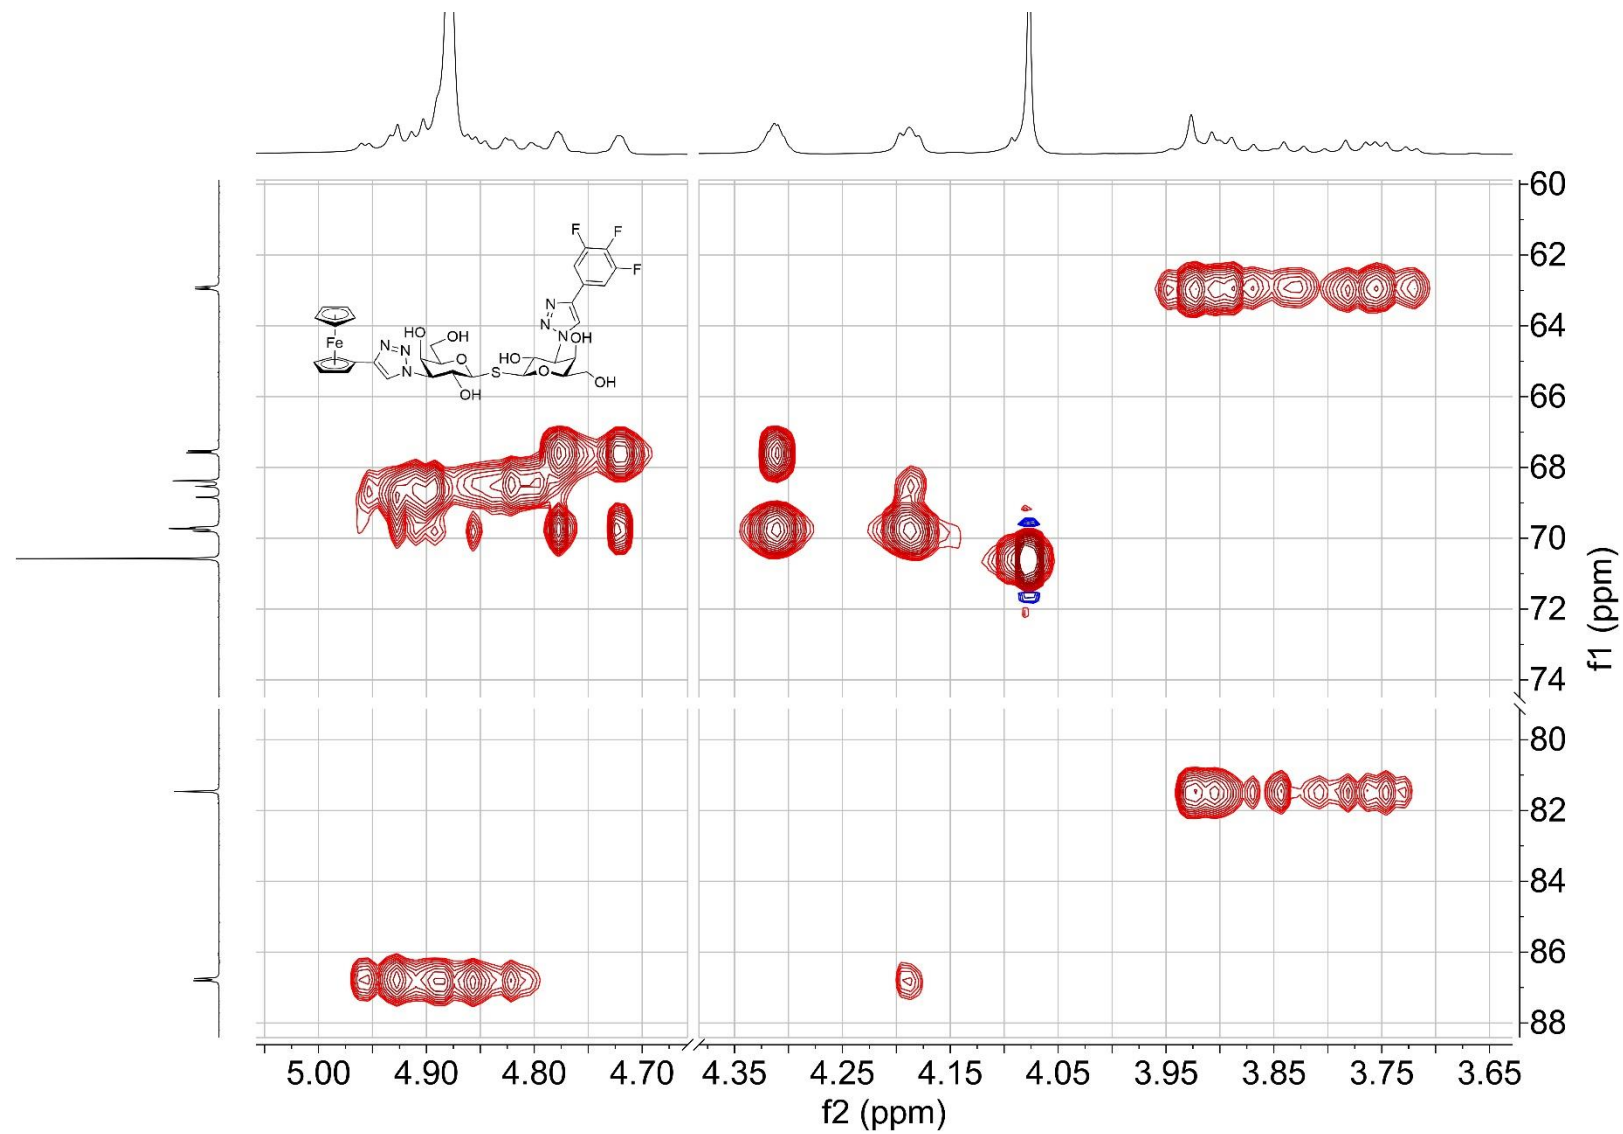

# NMR COMPOUND 42

## <sup>1</sup>H NMR (400 MHz, MeOD) 42

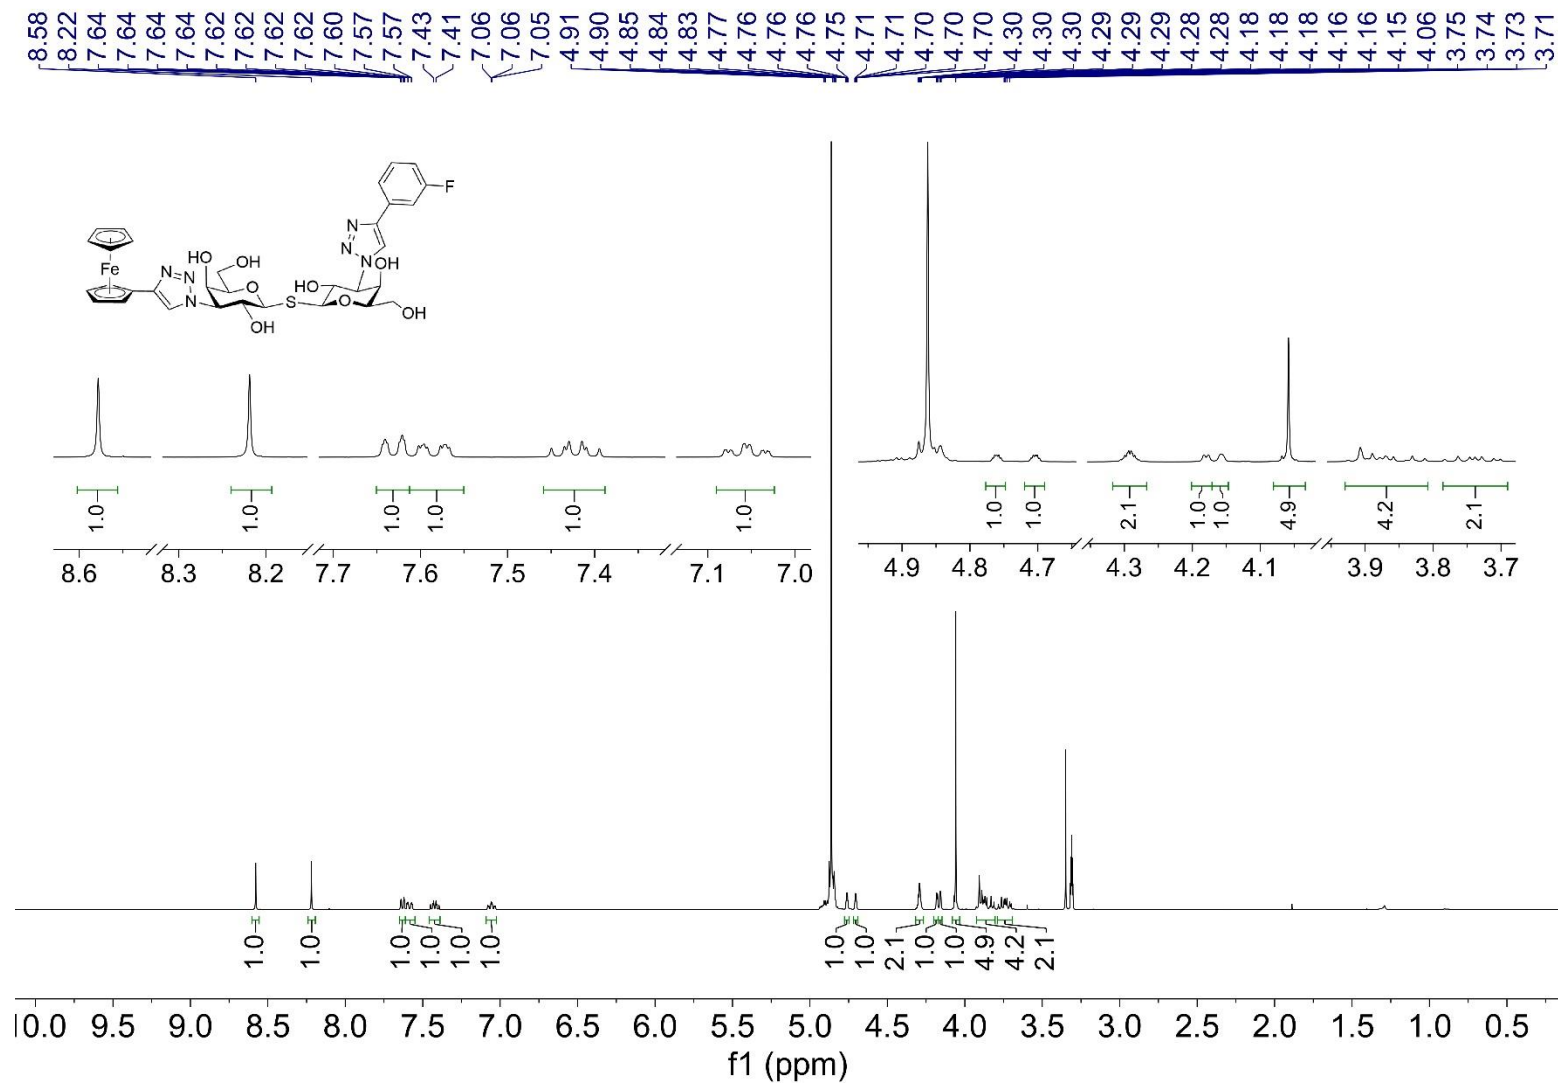

<sup>13</sup>C NMR (101 MHz, MeOD) 42

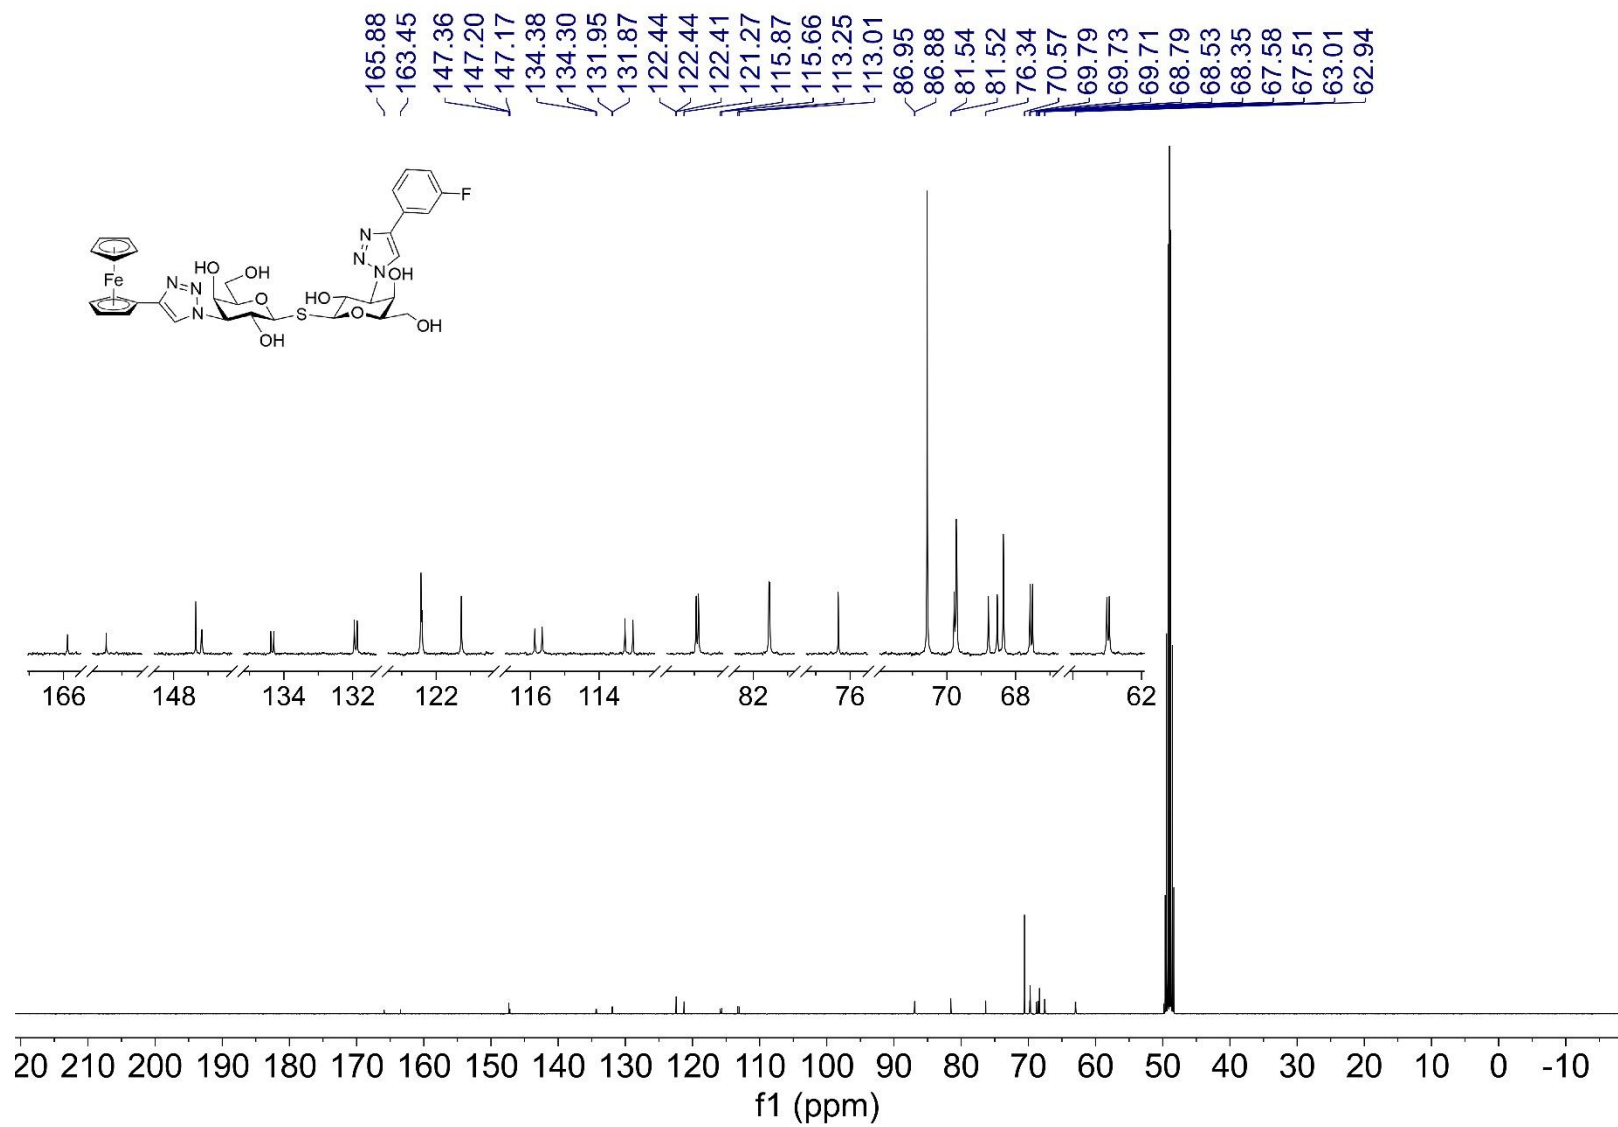



**<sup>19</sup>F NMR (376 MHz, MeOD) 42**

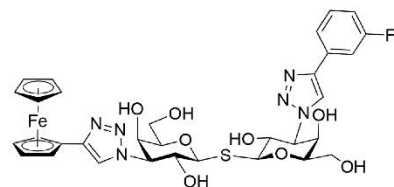

-115.95  
-115.97  
-115.98  
-115.99  
-116.00  
-116.02

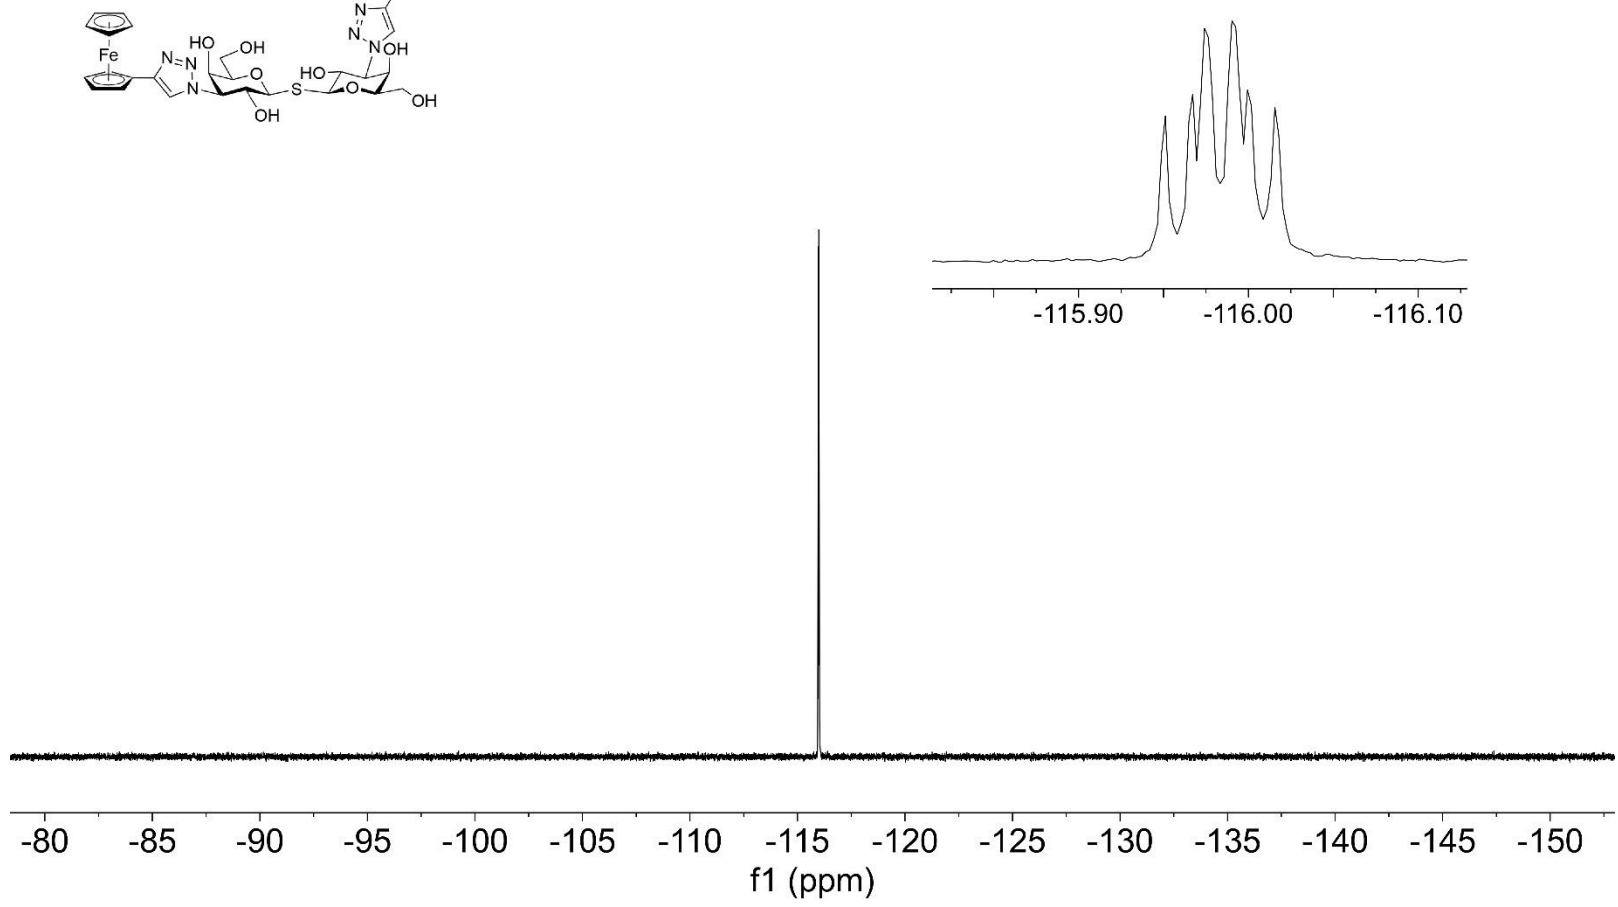

**$^1\text{H}$ - $^1\text{H}$  COSY 42**

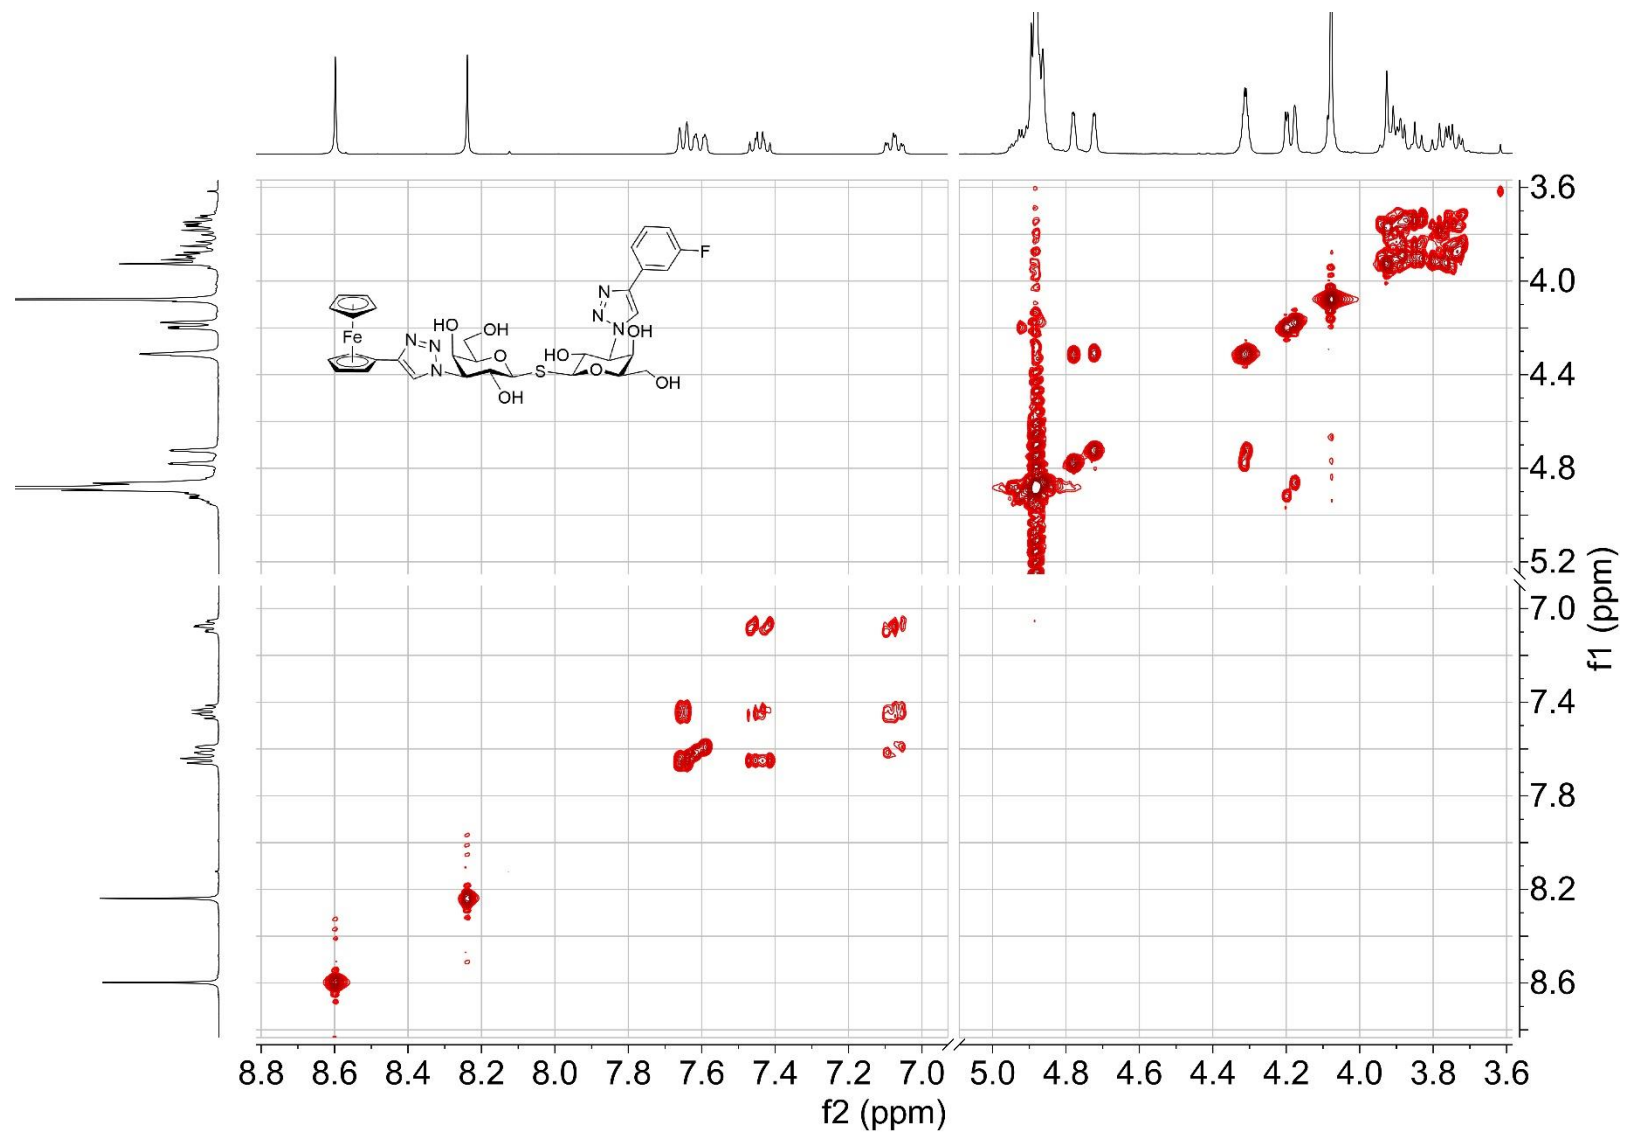

$^1\text{H}$ - $^{13}\text{C}$  HSQC 42

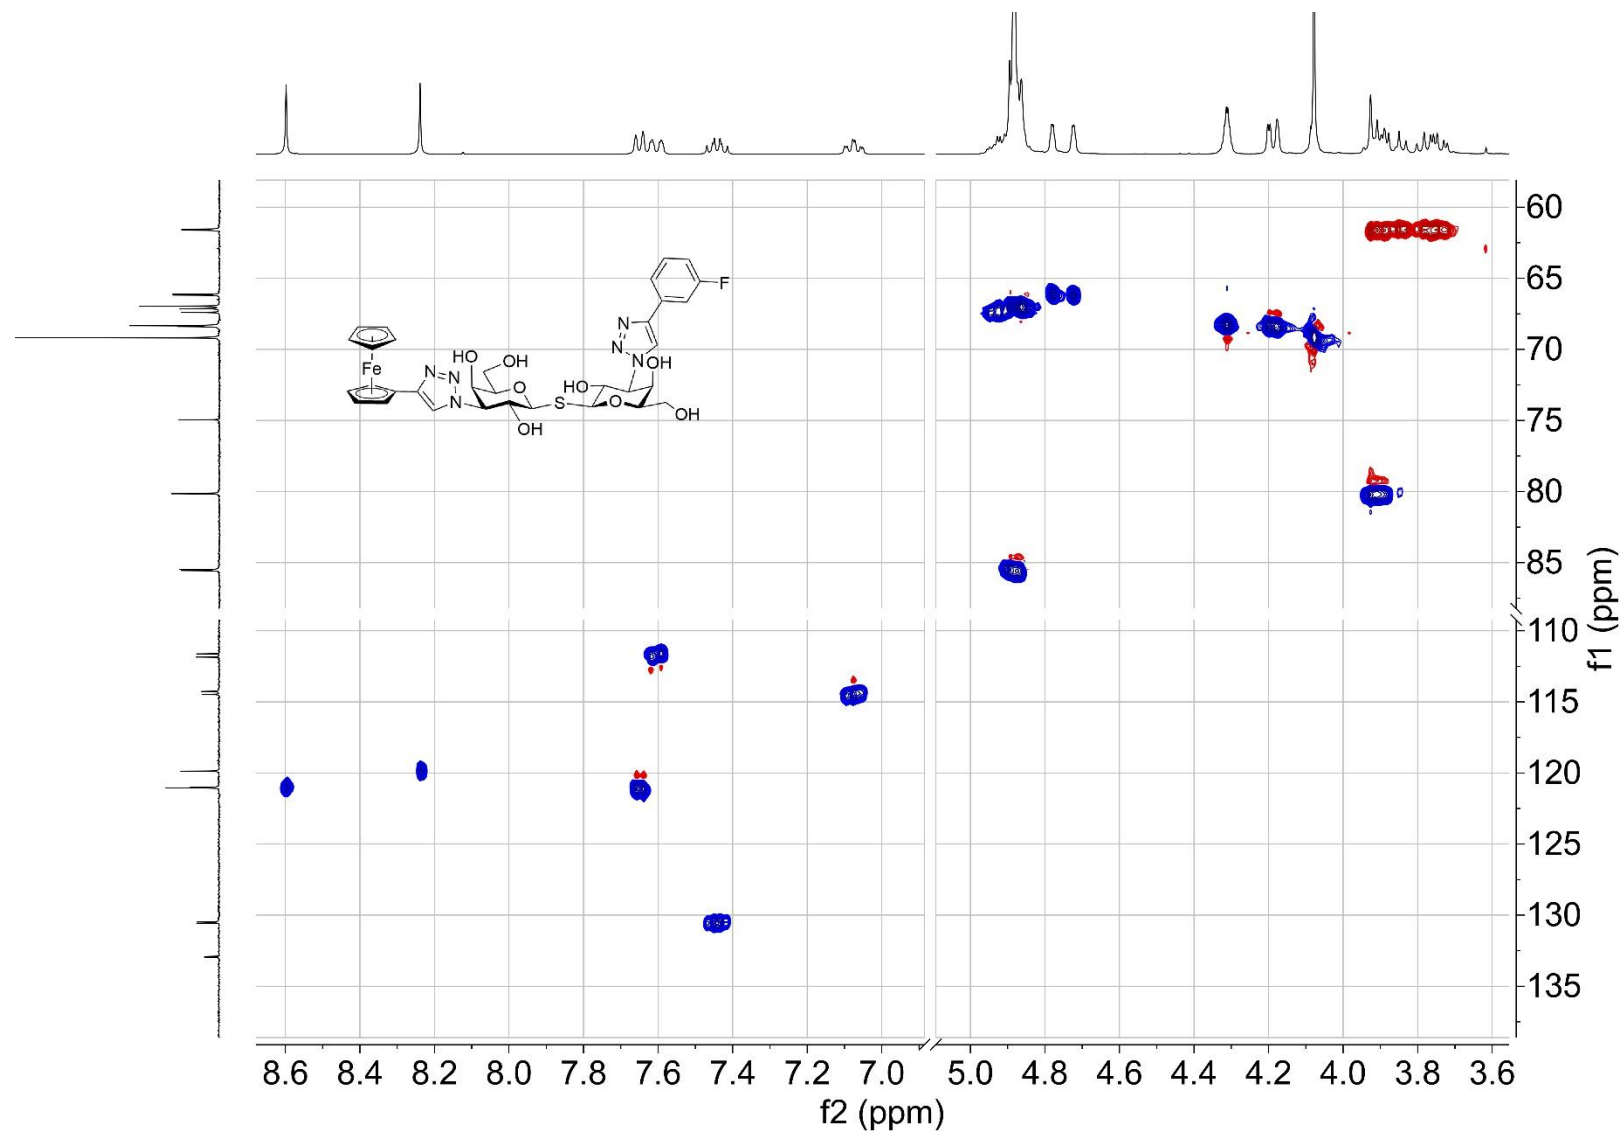

$^1\text{H}$ - $^{13}\text{C}$  HMBC 42

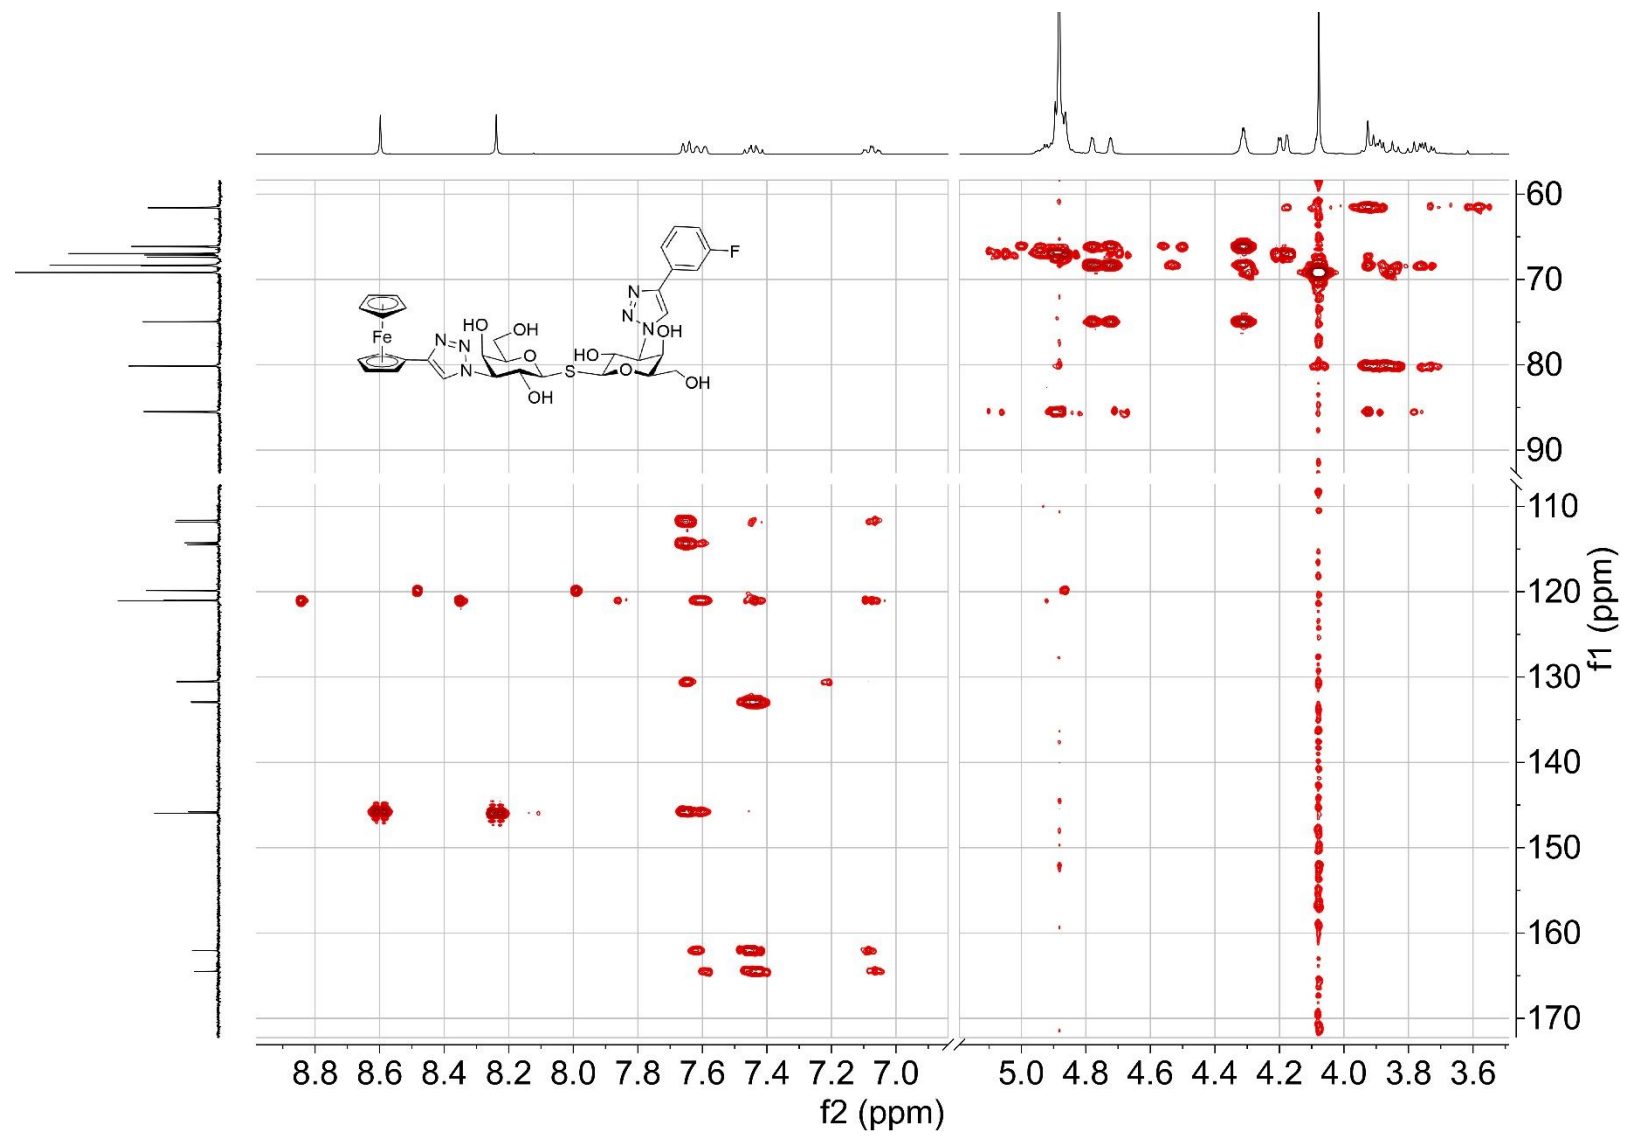

$^1\text{H}$ - $^{13}\text{C}$  HSQCTOCSY 42

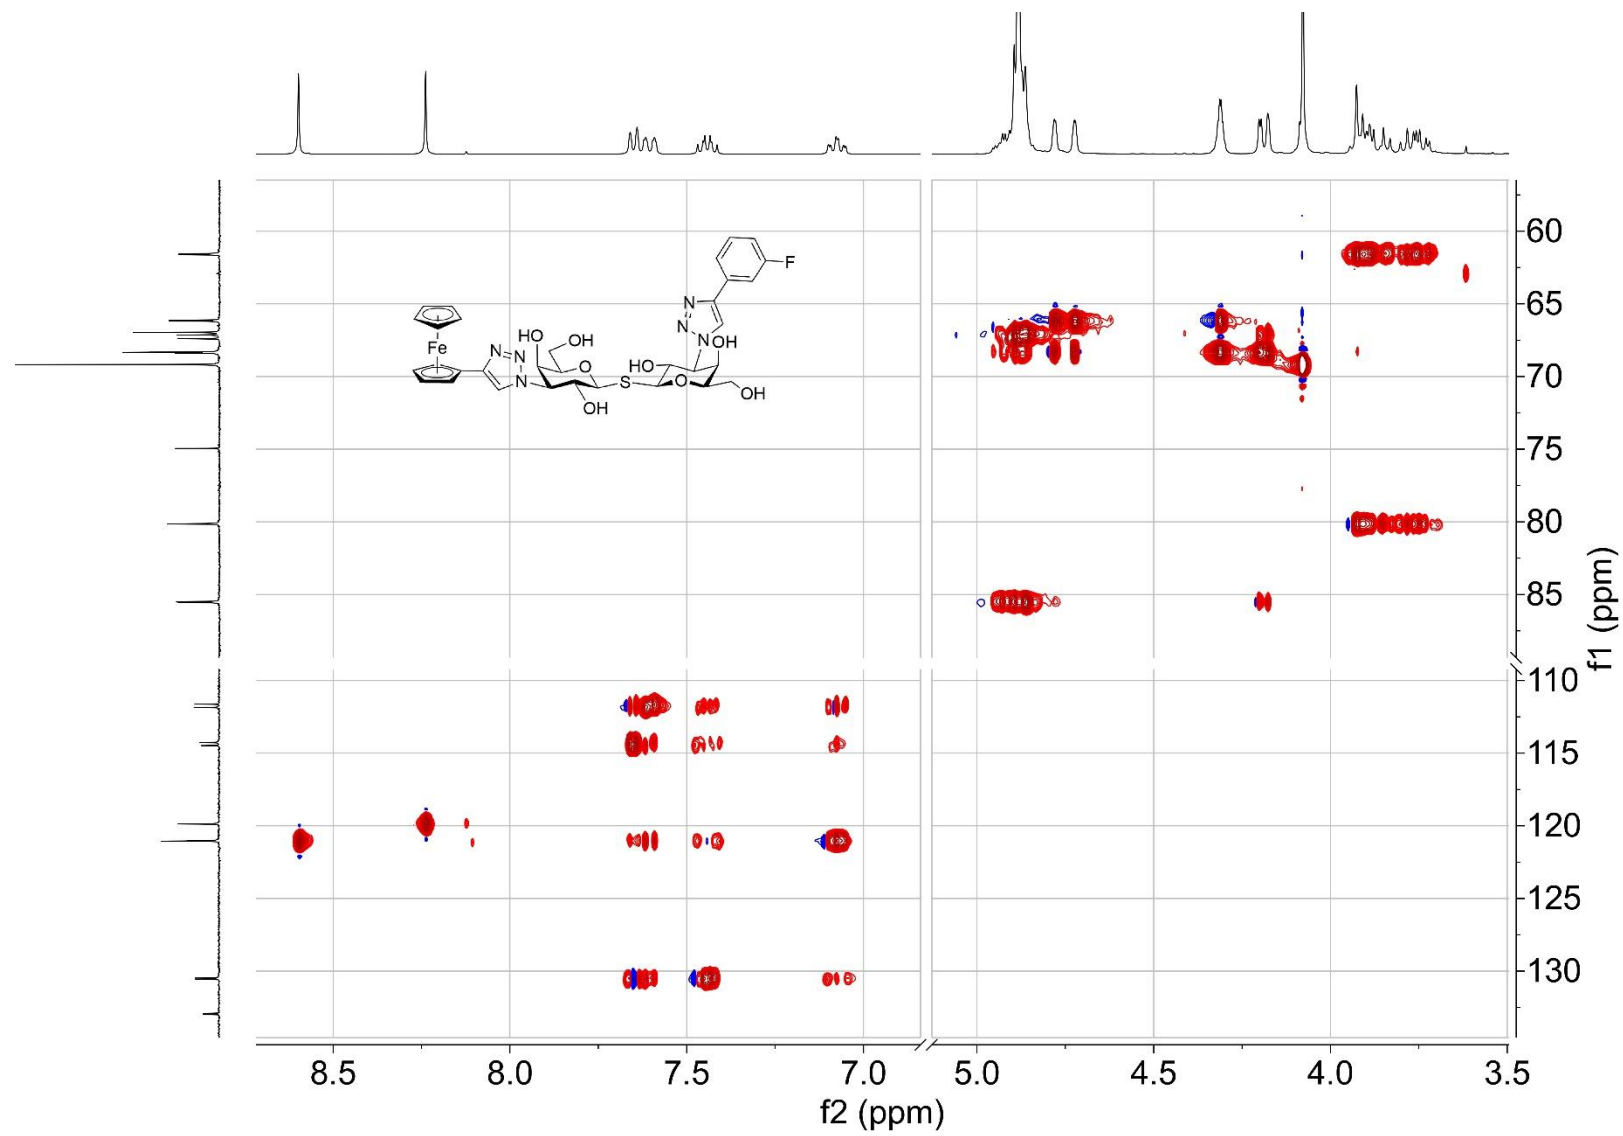

# NMR COMPOUND S3

## <sup>1</sup>H NMR (500 MHz, MeOD) S3

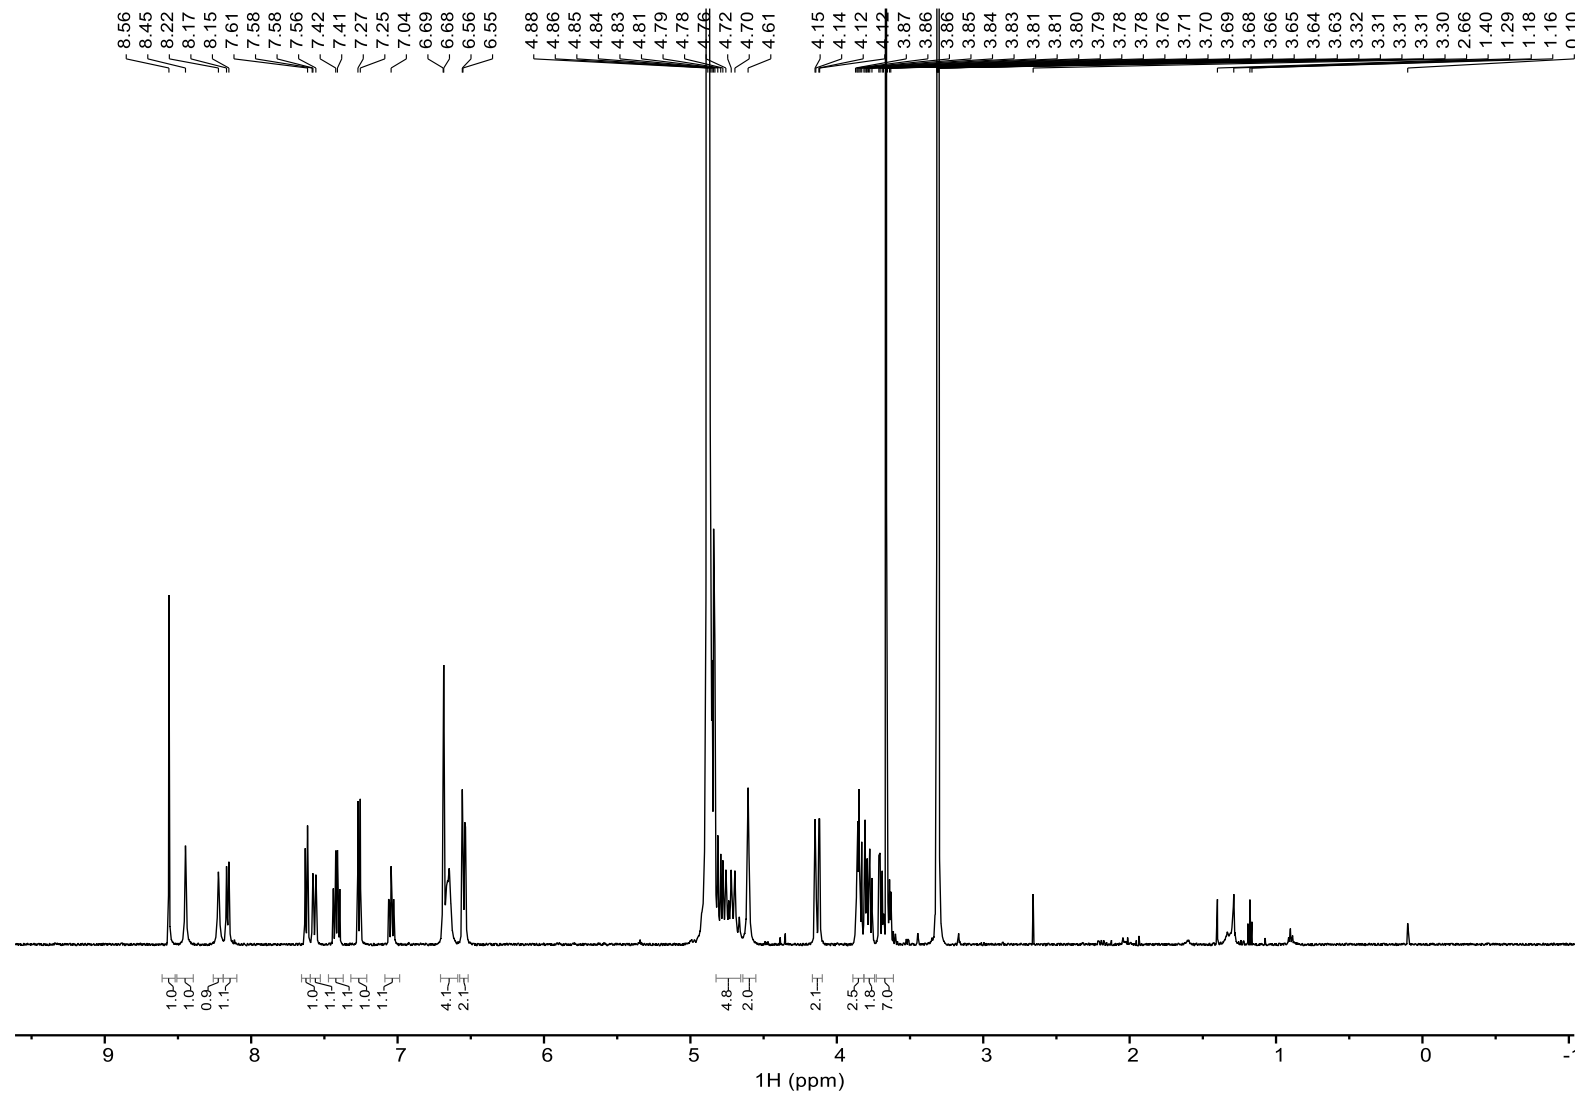

**$^{13}\text{C}\{^1\text{H}\}$  APT NMR (126 MHz, MeOD) S3**

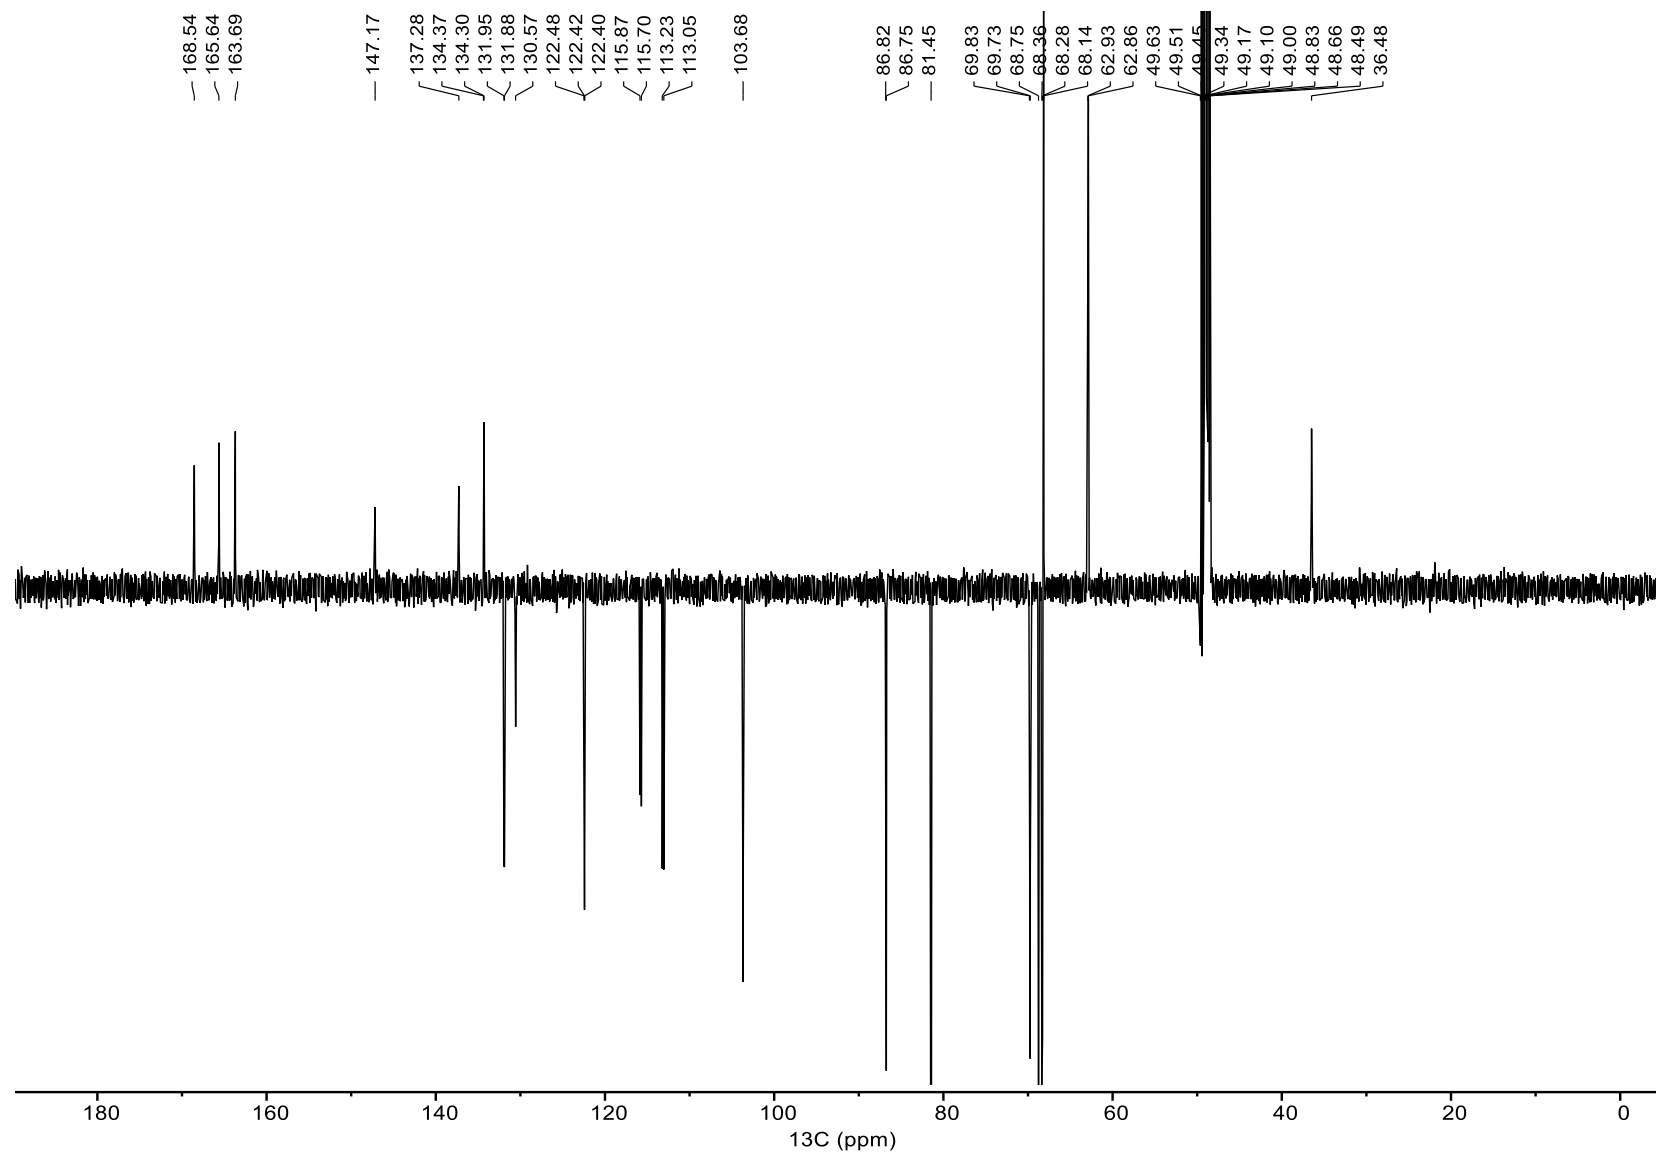

**<sup>19</sup>F NMR (470 MHz, MeOD) S3**

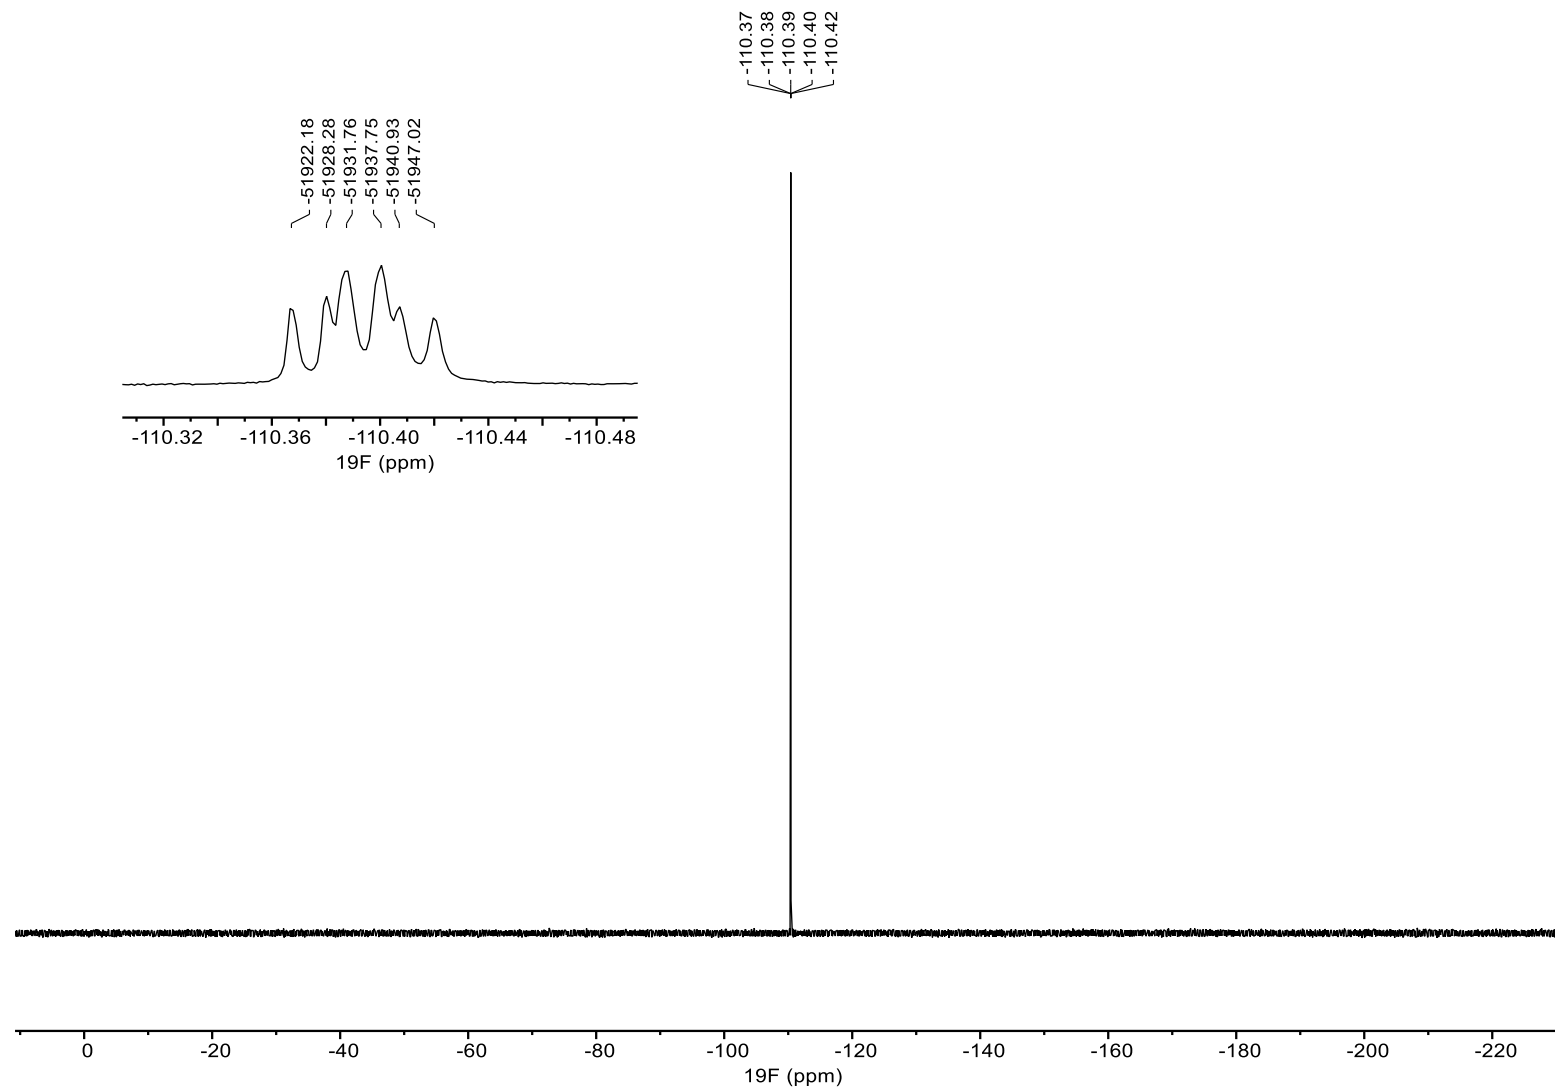



$^1\text{H}$ - $^{13}\text{C}$  HSQC S3

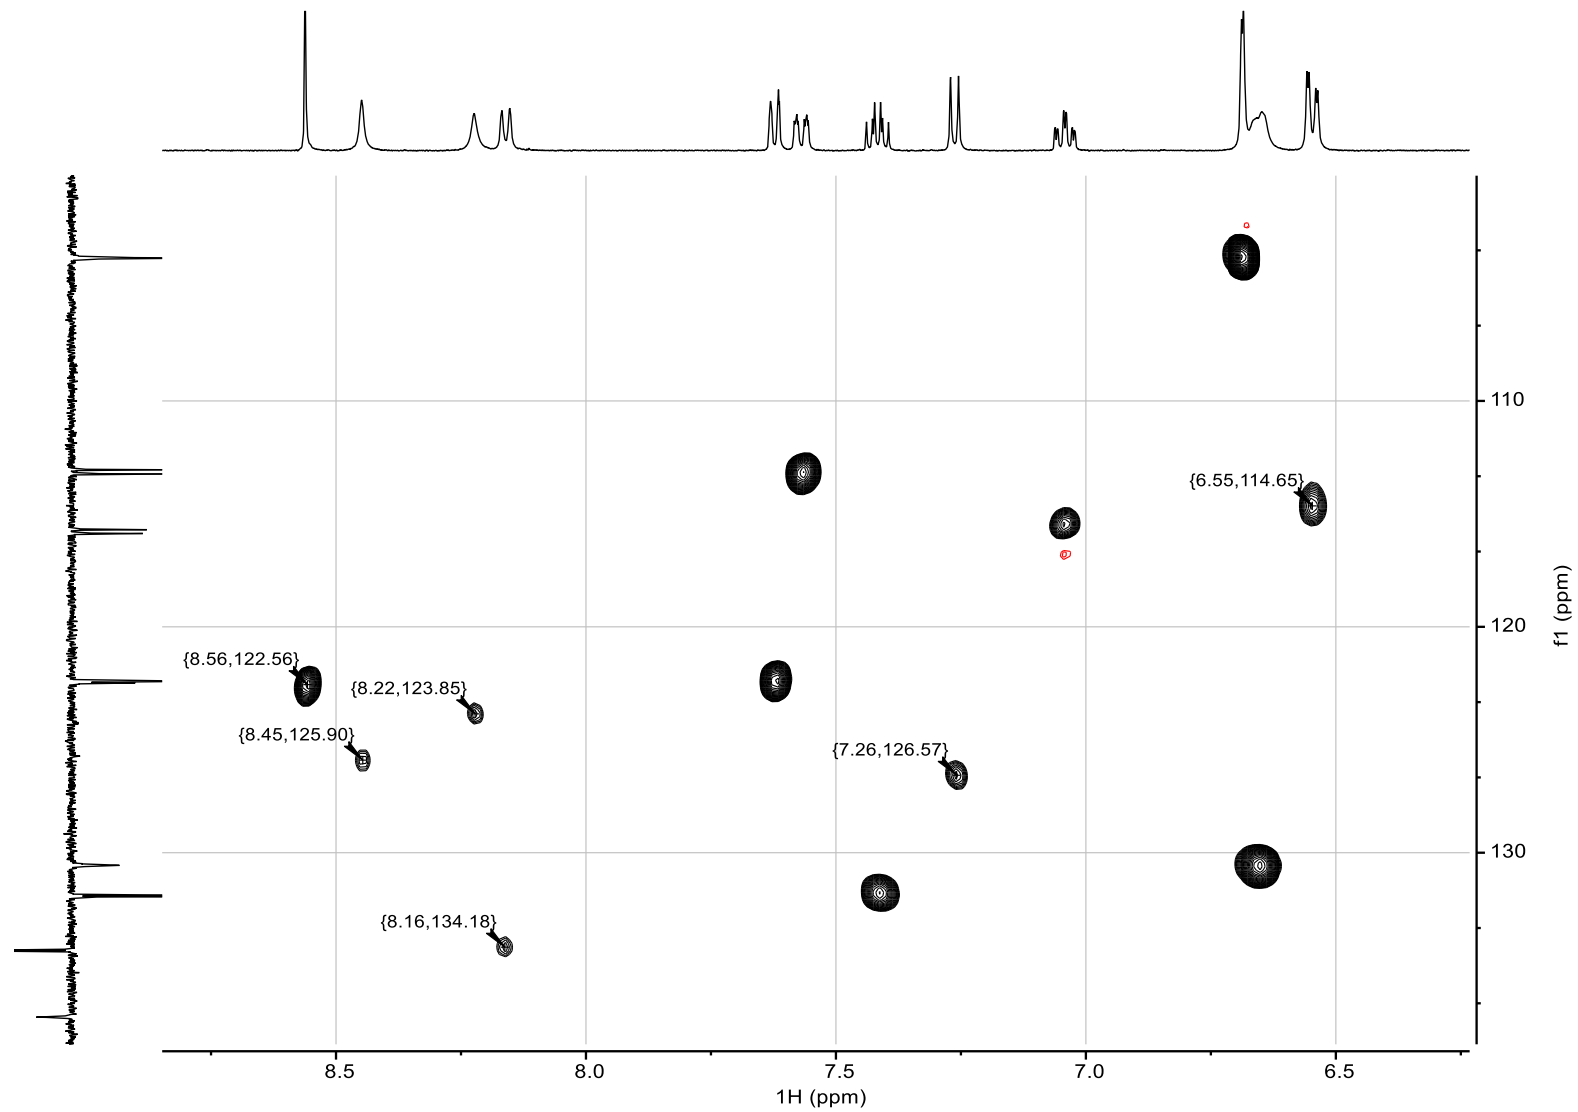

$^1\text{H}$ - $^{13}\text{C}$  HMBC S3

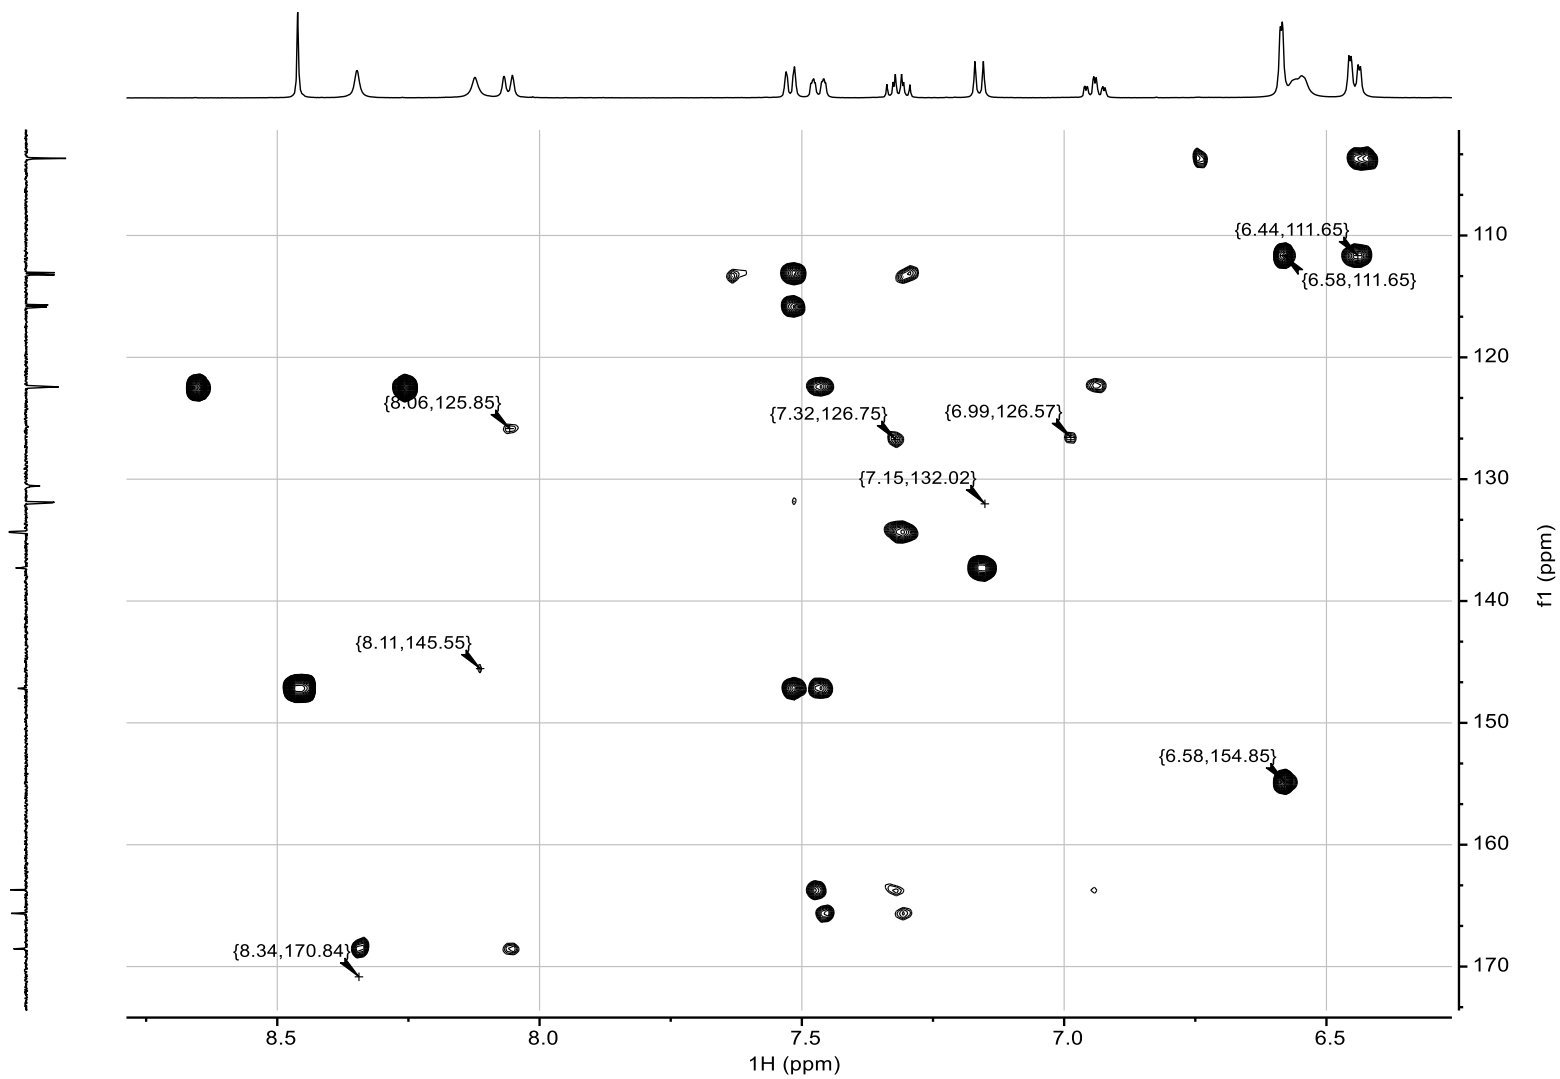

Supplement: d4qi01555j2.pdf [file d4qi01555j2.pdf]
