# Supplementary material for: Ferrocene- and ruthenium arene-containing glycomimetics as selective inhibitors of human galectin-1 and -3
Source: Royal Society of Chemistry journal article supplement (doi:10.1039/d4qi01555j), 2024-01-01
Supplement: d4qi01555j3.pdf [file d4qi01555j3.pdf]

**Table 4.** Thermodynamic parameters for binding to *hgal-1* and *hgal-3*-CRD obtained by ITC at T = 298 K.

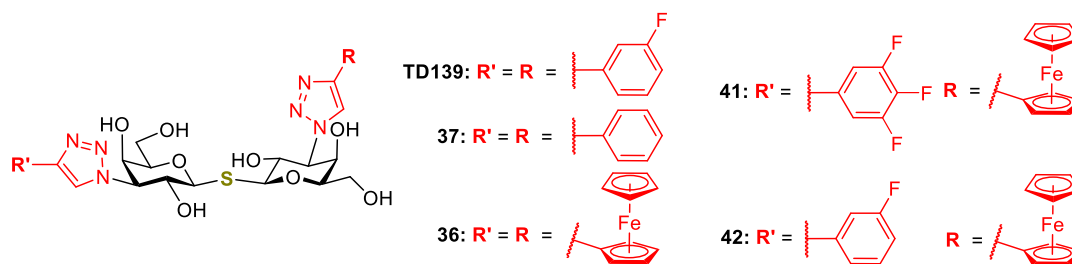

| Entry              | Compound                  | $K_d$ ( $\mu\text{M}$ ) | $\Delta G$<br>(kcal/mol) | $\Delta H$<br>(kcal/mol) | $-T\Delta S$<br>(kcal/mol) | n               | Selectivity<br>to <i>hgal-1</i> <sup>a</sup> |
|--------------------|---------------------------|-------------------------|--------------------------|--------------------------|----------------------------|-----------------|----------------------------------------------|
| <i>hgal-1</i>      |                           |                         |                          |                          |                            |                 |                                              |
| 1                  | <b>TD139</b> <sup>b</sup> | $0.220 \pm 0.05$        | $-9.1 \pm 0.2$           | $-16.7 \pm 0.4$          | $7.6 \pm 0.4$              | $0.96 \pm 0.04$ | 0.31                                         |
| 2                  | <b>TD139</b>              | $0.279 \pm 0.001$       | $-8.9 \pm 0.1$           | $-16.9 \pm 0.4$          | $8.0 \pm 0.4$              | $1.03 \pm 0.04$ | 0.07                                         |
| 3                  | <b>37</b>                 | $0.288 \pm 0.006$       | $-8.9 \pm 0.1$           | $-9.6 \pm 0.4$           | $0.7 \pm 0.4$              | $1.04 \pm 0.02$ | 0.33                                         |
| 4                  | <b>36</b>                 | $0.258 \pm 0.004$       | $-9.0 \pm 0.1$           | $-12.8 \pm 1.4$          | $3.8 \pm 1.5$              | $1.06 \pm 0.07$ | 3.6                                          |
| 5                  | <b>41</b>                 | $0.340 \pm 0.019$       | $-8.9 \pm 0.1$           | $-10.2 \pm 0.1$          | $1.3 \pm 0.1$              | $1.03 \pm 0.00$ | 0.07                                         |
| 6                  | <b>42</b>                 | $0.366 \pm 0.031$       | $-8.8 \pm 0.1$           | $-9.5 \pm 0.1$           | $0.6 \pm 0.1$              | $1.03 \pm 0.02$ | 0.18                                         |
| <i>hgal-3</i> -CRD |                           |                         |                          |                          |                            |                 |                                              |
| 7                  | <b>TD139</b> <sup>b</sup> | $0.068 \pm 0.01$        | $-9.9 \pm 0.4$           | $-18.2 \pm 0.8$          | $8.3 \pm 0.9$              | $0.96 \pm 0.01$ | -                                            |
| 8                  | <b>TD139</b>              | $0.019 \pm 0.003$       | $-10.6 \pm 0.1$          | $-16.4 \pm 0.4$          | $5.8 \pm 0.3$              | $1.08 \pm 0.01$ | -                                            |
| 9                  | <b>37</b>                 | $0.096 \pm 0.005$       | $-9.6 \pm 0.1$           | $-11.2 \pm 0.3$          | $1.7 \pm 0.2$              | $1.03 \pm 0.03$ | -                                            |
| 10                 | <b>36</b>                 | $0.923 \pm 0.04$        | $-8.3 \pm 0.1$           | $-12.7 \pm 0.2$          | $4.4 \pm 0.1$              | $1.08 \pm 0.02$ | -                                            |
| 11                 | <b>41</b>                 | $0.023 \pm 0.006$       | $-10.5 \pm 0.2$          | $-14.0 \pm 1.3$          | $3.6 \pm 1.5$              | $1.03 \pm 0.04$ | -                                            |
| 12                 | <b>42</b>                 | $0.066 \pm 0.010$       | $-9.8 \pm 0.1$           | $-12.0 \pm 0.2$          | $2.3 \pm 0.4$              | $1.01 \pm 0.00$ | -                                            |

<sup>a</sup> Defined as the ratio  $K_d(\textit{hgal-3})/K_d(\textit{hgal-1})$ . <sup>b</sup> Taken from ref.<sup>12b</sup>
